# Supplementary material for: Identification of Pathways and Key Genes in Carotid Atherosclerosis by Bioinformatics Analysis
Source: Research Square preprint supplement (doi:10.21203/rs.3.rs-1106491/v1), 2021-11-30
Supplement: Supplementary file 2 [file 0f2d585bc211dc6f507ec091.xlsx]

## Sheet: GSE100927
Genes	GSM2696614	GSM2696620	GSM2696623	GSM2696628	GSM2696630	GSM2696637	GSM2696643	GSM2696646	GSM2696652	GSM2696653	GSM2696657	GSM2696658	GSM2696667	GSM2696670	GSM2696673	GSM2696674	GSM2696679	GSM2696680	GSM2696681	GSM2696696	GSM2696701	GSM2696612	GSM2696615	GSM2696617	GSM2696627	GSM2696647	GSM2696688	GSM2696697	GSM2696700	GSM2696709	GSM2696711
A1BG	5.49615	5.4777	5.40127	5.34744	5.48175	5.57238	5.58742	5.45	5.5131	5.42107	5.51622	5.79095	5.68381	5.55554	5.45304	5.72772	5.7177	5.54069	5.59833	5.60143	5.56679	4.732	5.28979	4.93867	5.106	4.9715	4.9325	5.16192	5.12625	4.4035	5.2495
A1BG-AS1	5.82556	5.93067	5.58627	5.62007	5.79585	6.21429	5.89071	5.85313	5.82361	5.99389	5.92093	6.3098	6.15754	6.00167	5.6496	6.16746	6.127	5.86798	6.0469	5.97813	6.07726	4.3915	5.3775	5.00067	5.40281	4.942	5.1445	5.28	5.5101	4.236	5.41729
A1CF	4.50357	4.12095	4.00286	3.83476	3.80444	3.86889	3.80875	4.1679	3.87317	4.03071	3.78266	3.92837	4.20696	3.87619	3.83024	3.92065	3.87921	4.19615	4.01286	3.89095	3.88714	6.41492	4.13873	4.098	4.115	4.26833	4.1275	4.107	4.12733	5.13825	4.16322
A2M	10.7974	10.6074	11.1307	11.204	10.9352	11.0092	11.0182	10.7617	11.1655	10.6153	11.1004	10.5589	10.9666	11.312	11.3957	10.6494	10.7974	10.6609	10.9407	11.1371	10.7253	9.6855	10.7285	10.8275	10.8419	10.6653	10.6635	10.9784	10.7407	10.9175	10.9704
A2M-AS1	6.4473	6.23345	6.5089	6.40204	6.48286	6.04433	6.06698	6.60317	6.23996	6.28811	6.69206	6.68391	7.03333	6.49984	6.36583	6.32033	6.57827	6.28196	6.11657	6.42095	6.94766	6.7095	6.5245	5.9785	6.3918	6.28342	5.88067	6.27617	6.5245	6.42462	6.331
A2ML1	3.7303	3.90976	3.7131	3.64357	3.84835	3.61905	3.62929	3.76829	3.70929	3.67905	3.64286	3.53345	3.755	3.85463	3.65262	3.85825	3.82984	3.78694	3.82714	3.74833	3.72643	3.865	3.822	3.659	3.72	3.738	3.892	3.581	3.709	3.7205	3.941
A2MP1	4.02667	4.00095	3.94157	4.09455	4.08635	3.95143	3.85841	4.0425	3.80167	3.9867	3.7381	3.86976	4.1127	4.02929	4.04944	3.95778	3.96825	3.97786	3.85333	4.14071	3.95738	3.8335	3.88083	3.873	4.25617	4.05633	4.0165	4.27417	3.84112	3.9435	4.11133
A4GALT	7.92036	8.3219	7.63893	8.17082	8.01452	7.96496	7.37131	8.1204	7.9219	8.03976	8.12952	7.83143	7.93103	7.4481	7.91	7.58817	7.81897	8.35619	8.0604	7.69429	7.58738	7.52525	8.44367	8.37025	8.449	8.67	8.083	7.94757	8.25658	8.0935	8.303
A4GNT	4.19901	3.50714	3.76302	3.92008	3.63937	3.93992	3.65881	3.76829	3.5571	3.73937	3.88881	3.81252	3.88548	3.77115	3.85167	3.79447	3.78252	3.82984	3.89952	3.89952	3.51952	3.875	3.7935	3.753	3.72658	3.738	3.628	4.0105	3.81783	3.896	3.72
AA06	3.8573	3.69429	3.86656	3.58643	3.62024	3.7569	3.71151	3.82405	3.795	3.72825	3.61167	3.71563	3.83542	3.84279	3.79756	3.76238	3.59833	3.60476	3.82714	3.77175	3.70286	3.733	3.725	4.014	3.609	4.0005	3.792	3.6595	3.659	3.6995	3.8065
AAAS	6.98421	6.47067	6.17833	6.12067	6.16972	6.14011	6.11921	6.23836	6.23996	5.8673	6.36776	6.21734	6.1169	6.35226	6.13591	6.35964	6.33469	6.54016	6.30179	6.18675	6.24516	6.5385	6.0935	5.8142	5.82433	6.44317	5.94937	5.9968	6.2135	6.2408	6.03633
AACS	4.94952	4.9148	4.93202	4.86064	4.92	5.20075	4.68704	5.02524	5.07226	5.015	5.04952	4.9306	4.90333	4.74345	4.96094	4.9424	4.90976	4.8104	4.99367	4.89079	4.75381	4.93525	4.78617	5.23967	4.96675	4.94642	5.28983	4.98487	4.83817	4.704	4.8815
AACSP1	3.76056	3.76325	3.74806	3.862	4.10266	3.90095	3.85944	4.01111	3.92552	3.86529	3.87619	3.93429	3.82196	3.86955	3.70929	3.83828	4.02667	3.82984	3.89952	3.99357	3.78381	3.8135	3.8079	3.8135	3.87683	3.87333	3.9075	3.80582	3.84112	3.84479	3.6455
AADACL2	3.71048	3.55619	3.62369	3.63238	3.45429	3.67139	3.57262	3.76829	3.71873	3.70929	3.67224	3.69254	3.83542	3.80214	3.57762	3.72992	3.55881	3.71224	3.54619	3.85167	3.48802	3.82	3.8645	4.184	3.9135	3.6475	4.056	3.88713	3.90467	4.129	3.85533
AADACL3	4.79117	4.86556	4.93821	4.89195	4.76849	4.77135	4.73881	4.94093	4.81929	4.98841	4.79598	4.86214	4.87472	4.69036	4.70714	4.75497	4.77288	4.88063	4.88048	4.75532	4.74815	4.93525	4.77021	4.804	4.91007	4.8085	4.8445	4.735	4.6395	4.60217	4.848
AADACL4	3.71048	3.83913	3.37905	3.83476	3.83905	3.4706	4.24177	3.97506	3.82452	3.61321	3.88016	3.86671	3.74571	3.69734	4.13853	4.00802	5.33222	3.74548	3.58667	3.65317	3.71111	3.92125	3.7625	3.6195	3.963	4.097	3.922	3.8115	3.953	3.835	3.7585
AADACP1	4.06873	4.11579	3.95791	3.98163	3.8431	3.99433	3.96071	4.12494	4.08213	4.12111	3.95988	3.99881	3.90028	3.95913	4.00641	3.86379	3.95698	4.19992	3.95579	3.8873	3.94317	4.017	3.92704	3.83287	4.0655	3.98717	4.006	4.14233	3.97	4.02333	3.91783
AADAT	4.43274	4.79687	4.29964	4.33119	4.51357	4.58147	4.6159	4.32	4.68956	4.12111	4.42706	4.15981	4.25571	4.63611	4.62488	4.21809	4.26667	4.47563	4.25767	4.57702	4.33976	5.16792	4.735	5.71433	4.9055	5.071	5.00617	5.00333	4.755	6.14075	4.66917
AAGAB	7.37833	7.61381	7.22706	7.17675	7.21742	7.23143	7.09437	7.32929	7.22516	7.19198	7.19952	7.31524	7.40429	7.09905	7.22833	6.74151	7.12048	7.47667	7.19952	7.1419	7.29853	6.81467	7.49817	7.26	7.0915	7.14592	7.093	7.21383	7.4255	7.03392	6.953
AAK1	6.23419	6.04198	6.28552	6.14481	6.06476	6.07305	6.0399	6.20413	6.031	6.19103	6.06986	6.13844	6.25652	6.06516	6.07763	6.09243	6.0484	6.0659	6.09678	6.0659	6.15067	5.9785	6.1807	5.8411	6.1603	6.28955	5.90885	6.0353	6.1064	5.89683	5.98055
AAMDC	8.00024	7.84667	8.1531	8.05706	8.11905	8.23675	8.09357	7.92317	8.27917	7.99762	8.14135	7.86357	8.04786	8.025	8.17468	7.81044	7.96079	7.89857	7.89708	8.15443	8.00619	8.7505	8.0575	8.486	8.258	8.43579	8.516	8.18	8.031	8.74575	7.76792
AAMP	6.22881	6.43413	6.53663	6.67643	6.73905	6.78968	6.71504	6.67708	6.80357	6.69508	6.9119	6.72468	6.50839	6.74619	6.98333	6.89103	6.7626	6.24643	6.69502	6.842	6.6181	6.68908	6.7912	7.1225	6.78267	7.0215	6.896	6.91075	6.75883	7.05192	6.8295
AANAT	4.10762	4.30732	4.15079	4.4073	4.32901	4.09536	4.29	4.01681	4.04675	4.1954	4.02103	3.98212	4.21712	4.09524	4.24079	4.03889	4.07929	4.15786	4.30772	3.9479	4.28226	4.10833	4.26	5.2305	4.452	4.05633	4.59292	4.412	4.225	4.24558	4.33958
AAR2	5.32758	5.38198	5.15956	5.0919	5.27381	5.15881	5.00141	5.34476	5.2731	5.1882	5.24198	5.21937	5.15282	5.04151	5.16103	5.26067	5.11985	5.34214	5.2504	5.24667	5.20071	5.11217	5.15833	5.461	5.29162	5.2192	5.176	5.1925	5.21017	5.2575	5.03613
AARD	3.72	3.93087	3.95159	3.94063	3.74754	3.92806	3.77238	4.0381	3.795	3.87535	3.73246	3.89873	3.96466	4.10405	4.18825	3.81631	3.82071	4.07976	3.70119	3.90968	3.86244	3.885	3.7625	4.4205	3.7085	4.01092	4.1635	3.79133	3.8265	3.886	3.79733
AARS	5.58758	5.68948	5.57359	6.0171	5.9496	6.14976	6.00583	5.95583	6.00492	5.97373	6.00776	6.26614	5.88302	6.00167	6.03177	6.32033	6.09627	5.66827	6.02495	6.0484	5.94646	5.5765	5.941	6.156	5.88067	6.12817	5.969	5.9585	5.95083	5.7335	6.255
AARS2	6.49821	6.58548	6.55778	6.52847	6.4924	6.62698	6.61452	6.60317	6.48294	6.64806	6.53356	6.63917	6.57675	6.53702	6.61702	6.59879	6.58905	6.65323	6.39609	6.60111	6.47159	6.349	6.05067	5.91933	6.06467	6.014	5.94937	6.05971	6.15829	5.86283	6.392
AARSD1	5.98595	6.09567	6.22992	6.15925	6.20377	6.19462	6.23077	6.21734	6.25016	6.14081	6.23532	6.13222	6.20006	6.1619	6.32901	6.18844	6.16405	6.05087	6.35734	6.25726	6.15067	6.5585	6.29475	6.566	6.21367	6.626	6.32475	6.323	6.2745	6.59517	6.3407
AASDH	4.65873	4.67475	4.7681	4.83067	5.08294	4.87555	4.78089	5.06799	4.80119	4.77131	4.8004	4.92	4.95824	4.87169	4.76833	4.69675	4.89261	4.64427	4.68548	4.73079	4.80119	4.83558	4.84	4.79329	4.676	4.45667	4.6936	4.7455	4.6665	4.7455	4.85983
AASDHPPT	6.4004	6.39603	6.08385	6.06361	6.27669	6.27484	6.60532	6.14905	6.16754	6.51071	6.29722	6.11196	6.52762	6.52901	6.19286	6.34024	6.35389	6.59714	6.2803	6.25726	6.43095	6.40617	6.03	6.24867	6.205	5.9595	6.36617	6.27617	6.09233	6.86175	6.24525
AASS	5.2119	5.13371	5.57359	5.7558	5.35667	5.30984	5.30405	5.41263	5.43757	5.38472	5.34744	4.71077	4.84845	5.50778	5.6496	4.75127	5.15369	5.23873	5.41238	5.29721	5.26445	6.502	6.00662	6.553	6.08567	6.67892	6.4445	6.12587	6.052	6.19	5.916
AATBC	4.43687	4.36901	4.51119	4.27262	4.37226	4.54599	4.23829	4.47694	4.45948	4.20702	4.47183	4.69938	4.25948	4.28079	4.27226	4.59631	4.54253	4.27445	4.2621	4.38579	4.3475	4.64792	4.13308	3.98958	4.02825	4.12275	4.05392	4.09038	4.1	4.03425	4.19175
AATF	7.29917	7.14952	6.89488	6.94619	6.96774	7.06813	6.90726	6.96758	6.97762	6.74016	7.10337	6.95524	6.96405	6.90893	7.05968	7.0677	6.99472	7.11825	6.98413	7.04238	6.83119	6.991	7.0115	7.21	6.83908	6.99687	6.922	6.889	7.0205	7.10583	6.7505
AATK	4.77696	5.04024	4.6681	4.68929	4.50914	4.52635	4.5346	4.60286	4.64778	4.76641	4.59905	4.51452	4.72155	4.61675	4.56929	4.58585	4.64869	5.06724	4.73079	4.38467	4.47952	4.685	4.776	4.442	4.47325	4.84133	4.3	4.714	4.928	4.3895	5.24452
ABAT	5.08143	5.06075	5.08028	5.03897	4.98621	5.04413	4.90333	5.04492	5.02157	4.9283	4.94481	4.95456	4.94905	4.97999	4.94959	4.94869	4.99749	5.08155	5.13833	5.03581	5.09278	5.15892	4.77952	4.90017	5.0595	4.89483	5.203	5.1825	4.8975	5.00497	4.81375
ABCA1	7.68071	7.09286	7.39452	6.89452	7.56238	7.11508	7.84456	7.24885	7.00087	7.33167	7.45944	7.62103	7.22813	7.04238	7.04831	7.55214	7.12821	7.07976	7.36278	7.12373	7.32194	5.843	7.2385	5.3025	7.16833	6.1715	5.962	7.18267	7.2655	6.5715	7.72708
ABCA10	3.91786	3.83913	3.98224	3.85603	3.97786	4.01054	3.85548	4.07921	3.74613	4.05929	4.19861	3.99325	3.83542	3.79087	3.83024	4.09097	3.9727	3.79855	3.86833	4.01286	3.97405	4.2155	4.04754	4.1625	4.1428	4.15317	4.15508	4.195	3.64	4.369	4.20467
ABCA12	3.72	3.69429	3.70315	3.90993	3.73952	3.82762	3.77238	3.76829	3.54048	3.67905	4.09258	3.76738	3.78198	3.6748	3.45976	3.48143	3.71952	3.7014	3.50595	3.77175	3.57786	3.865	3.673	3.57233	3.89367	3.604	3.792	3.6595	3.8265	3.534	3.70937
ABCA13	4.09696	3.88925	3.95159	3.98163	4.05399	3.88841	3.80198	3.91048	3.81405	3.88714	3.93891	3.96024	4.02214	3.93471	3.77437	4.10018	3.91984	3.92028	3.82714	3.95641	4.04867	3.894	3.7845	3.6995	3.982	3.83017	3.74967	4.0105	3.9315	3.6995	4.308
ABCA17P	3.76056	3.86833	3.74425	3.87769	3.70246	4.12454	3.98429	3.91048	3.93456	3.79246	3.85	3.69254	3.97536	3.96317	3.89381	3.95238	4.11048	3.68952	3.74349	3.98373	3.69476	4.0555	3.832	3.753	3.72658	4.097	3.648	3.6005	3.8745	4.129	3.689
ABCA2	4.70349	4.48583	4.54167	4.50762	4.56833	4.60532	4.57243	4.42262	4.51448	4.40631	4.52087	4.44357	4.48465	4.53762	4.5495	4.54333	4.66642	4.45595	4.75716	4.51016	4.61675	4.732	4.46542	4.656	4.411	4.72042	4.47667	4.5125	4.39417	4.47017	4.61913
ABCA4	3.91786	3.87865	3.90952	3.89881	4.02464	4.02	3.9078	4.02821	3.97419	4.18409	3.88881	3.88857	3.77286	3.83325	3.83024	3.58881	4.00194	3.9931	3.92143	3.92857	4.01143	3.95	3.9405	3.711	3.922	3.98717	3.88117	3.87817	3.885	3.7315	4.0805
ABCA5	5.5169	5.32876	5.46139	5.4547	5.64187	5.33913	5.42294	5.53111	5.31115	5.53082	5.61194	5.57563	5.62763	5.11619	5.43913	5.63964	5.62802	5.38937	5.22226	5.42298	5.37437	5.73473	5.47788	5.42783	5.675	5.5425	5.70517	5.687	5.5101	5.89683	5.714
ABCA6	6.17004	6.45276	5.91022	6.60155	6.06476	6.21429	5.33758	6.21734	5.96913	6.57522	6.29722	6.17934	6.21837	5.95456	6.15683	5.55841	6.46126	6.27213	5.62544	5.9154	5.75776	6.52117	6.566	6.0465	7.0745	6.6445	7.16737	6.934	6.459	5.9785	7.0985
ABCA7	6.65452	6.6177	6.4881	5.81552	5.92093	6.29119	6.00583	6.47852	6.10492	6.30627	6.2463	6.63917	6.86802	6.1619	5.86702	6.02665	6.64806	6.5781	5.79833	6.14976	6.68022	4.472	6.10139	4.024	5.675	5.00533	4.87258	5.73051	6.13211	4.5355	5.74417
ABCA8	4.0765	4.4546	4.45048	4.64331	4.44762	4.70032	4.19556	4.56405	4.57553	4.68537	4.53476	4.51952	4.49585	4.25952	4.55786	4.05915	4.5391	4.45595	4.22524	4.22762	4.14167	5.81714	5.71967	5.56258	5.9705	6.2145	6.03775	6.05971	5.64692	6.19433	5.879
ABCA9	10.0931	10.4778	10.6033	10.5538	10.3413	10.367	10.1394	10.4996	10.3116	10.5309	10.2661	10.0973	10.4402	10.4888	10.5769	10.129	10.2122	10.358	10.3182	10.2931	10.4678	10.8328	10.4275	10.5327	10.4025	10.5832	10.4565	10.4635	10.4526	10.1293	10.6753
ABCB1	4.6946	4.59143	4.77378	4.87488	4.63445	4.82461	4.51635	4.90714	4.43262	4.92163	4.96774	4.60095	4.99365	4.90071	4.94959	4.48317	4.56853	4.59456	4.83527	4.6696	4.84258	4.2055	4.686	4.235	4.4905	4.45667	4.35142	4.592	4.6335	4.71433	4.69304
ABCB10	5.16627	5.08012	5.05317	5.11081	5.38048	5.04413	5.17087	5.06335	5.26309	4.98238	5.44806	5.15583	5.25357	5.09719	5.0444	5.25611	4.96474	5.06724	5.30512	5.26992	5.06397	5.214	5.0415	5.61933	5.21125	5.24153	5.32958	5.1405	4.8835	5.236	5.17145
ABCB11	3.84863	3.68365	3.68571	4.02	3.79548	3.71413	3.70214	3.82405	3.81405	3.73937	3.69476	3.58845	3.49	3.6146	3.69845	3.84849	3.86913	3.76452	3.84948	3.89952	3.84857	3.847	3.8435	3.7205	3.74467	3.77	3.524	3.689	3.79567	3.69038	3.81695
ABCB4	5.87634	5.41238	5.79815	5.5447	5.88944	5.30984	5.62708	5.70755	5.34175	5.36796	5.83558	5.24837	5.86626	5.59794	6.012	5.58941	5.53643	5.46937	5.93321	5.64778	5.73952	5.26683	4.92117	5.9288	4.8065	5.74167	5.60383	4.9715	4.85917	5.941	5.63792
ABCB5	5.60994	4.41554	4.94365	4.31024	4.62135	5.18254	5.01079	4.69647	4.65143	4.99901	4.95587	5.27087	5.07849	4.8431	4.21423	4.91921	4.78881	4.40414	4.32016	5.2894	4.34476	3.75633	4.27733	3.78933	4.00783	3.87333	3.90633	3.936	4.32758	3.65333	4.26054
ABCB6	6.14981	7.18524	6.78556	7.18683	6.67661	6.86159	6.78627	6.99937	6.95579	6.8325	6.55226	6.50806	7.14028	6.85387	6.76952	6.88071	6.9021	7.27841	6.90353	6.842	6.48504	7.145	6.97325	6.9245	6.98325	6.88825	6.87542	7.05775	7.05025	6.87283	6.718
ABCB7	6.70381	6.64542	6.67587	6.56905	6.45262	6.36767	6.43095	6.49738	6.47305	6.3427	6.56405	6.34056	6.6271	6.3869	6.43762	6.28119	6.28159	6.48008	6.44346	6.19656	6.44029	6.41492	6.71942	6.33717	6.6585	6.41269	6.295	6.4425	6.671	6.482	6.3407
ABCB8	5.16159	4.71437	4.57592	4.1881	4.37806	4.41675	4.37881	4.13931	4.38254	4.1954	4.36932	4.60929	4.3821	4.46532	4.34937	4.50075	4.45079	4.51627	4.29843	4.40854	4.15603	4.1945	4.3405	4.4935	4.2035	4.35208	4.31042	4.24692	4.2045	3.907	4.28817
ABCB9	4.11817	4.0825	4.20327	3.9921	3.86825	3.86889	3.9078	4.02821	4.10905	3.87535	4.22825	3.88857	3.86635	4.10405	3.974	4.16611	3.84048	3.88127	4.08403	4.21289	3.7419	4.13792	4.27183	3.907	4.19417	3.98717	3.8725	4.04633	3.99467	4.129	4.184
ABCC1	6.14981	6.0028	5.76706	5.71618	5.76607	5.51829	5.6181	5.60778	5.90722	5.49169	5.49373	5.70274	5.7377	5.82352	5.51909	5.65063	5.67079	6.13048	5.56302	5.55992	5.69802	5.4285	5.91083	6.27121	5.7125	6.1415	6.333	5.87725	6.0413	5.7465	5.5595
ABCC10	5.27365	5.21172	5.36796	5.42244	5.12619	5.32857	5.26925	5.35591	5.38013	5.41266	5.29738	5.52071	5.30968	5.36054	5.41779	5.57456	5.45464	5.32581	5.3723	5.28131	5.4699	5.12221	5.02867	5.01633	5.0215	4.96188	5.07483	4.98922	5.17667	4.659	5.16967
ABCC11	4.02667	3.99143	3.76738	3.86286	3.85167	3.74643	3.61024	3.74119	3.87317	3.79619	3.81643	3.60167	3.84048	3.80214	3.66067	3.78905	3.84595	3.92607	3.87286	3.60452	3.72071	3.6395	3.8115	3.789	3.6635	3.83017	3.8725	3.6575	3.8015	3.66533	3.73933
ABCC12	3.77	3.65	3.79262	3.79238	3.82071	3.84881	3.67857	3.69476	3.35095	3.56774	3.84048	3.88857	3.83542	3.74992	3.79756	3.72992	3.60837	3.63643	3.72181	3.62218	3.51357	3.6815	3.6155	3.711	3.59525	3.6475	3.535	3.71069	3.8265	3.7315	3.73933
ABCC13	3.80643	3.79478	3.85548	3.70552	3.86825	3.7379	4.10833	3.6519	4.0231	4.03071	3.74433	3.85528	3.70286	3.69734	3.8081	4.29881	3.58833	3.84095	3.56595	4.41905	4.0204	3.85767	3.875	3.866	3.823	3.7785	3.771	3.85029	4.1945	3.69038	3.568
ABCC2	3.9931	4.14111	4.04615	4.03586	3.86373	3.99387	3.87905	4.0746	3.93456	3.98393	4.11649	3.9877	4.11837	4.06044	3.96877	4.05915	3.96663	3.93929	3.91522	3.9619	4.06512	4.09417	4.01483	4.0655	4.106	3.96829	4.6515	4.19117	4.09575	4.1735	4.0875
ABCC3	7.49933	7.39123	6.90452	7.02302	7.1754	6.63595	7.20286	7.0623	7.16133	6.91862	7.05984	7.30433	7.43738	6.74619	6.89512	7.26655	7.5269	7.4127	7.17857	6.88591	7.00599	5.11217	6.50971	6.63658	6.17175	5.9275	6.09942	6.15517	6.5385	6.004	6.44892
ABCC4	4.13685	4.38945	4.38825	4.6045	4.4177	4.64905	4.42378	4.51161	4.3731	4.37975	4.36932	4.42578	4.33722	4.5225	4.28929	4.32016	4.36008	4.44544	4.38806	4.28034	4.22238	4.282	4.3895	4.2575	4.19417	4.11717	4.27767	4.28867	4.4405	4.442	4.35733
ABCC5	6.99306	6.7977	7.14929	6.78611	6.94897	6.81548	7.18198	7.28944	6.86603	7.00462	6.92802	7.53929	7.10579	6.99246	6.51917	7.31087	7.01595	6.76437	6.74812	6.99286	7.02865	6.1845	6.23783	5.44208	6.56833	5.94	6.02858	6.54317	6.27121	5.76617	6.37683
ABCC6	4.85595	4.69647	4.54745	4.82599	4.83794	4.53417	4.68079	4.71609	4.53179	4.80371	4.7316	4.565	4.86214	4.55302	4.6779	4.71345	4.66274	4.75975	4.81619	4.6325	4.68956	4.53958	4.58033	4.27875	4.39525	4.67533	4.411	4.348	4.62658	4.4785	4.6755
ABCC6P1	3.77	3.38286	3.68571	3.74762	3.62024	3.65944	3.80198	3.74623	3.90254	3.88714	3.68667	3.8327	3.97536	3.77115	3.8081	3.75143	3.99143	3.78694	3.88918	3.71952	3.72643	3.95733	3.822	3.76275	3.941	4.01092	3.8325	3.65	3.79567	3.803	3.775
ABCC8	4.04718	3.97286	3.82381	3.92008	4.16571	3.87833	4.14302	4.00429	4.05815	3.98063	4.00262	4.04722	4.08849	4.06738	4.07905	4.00802	4.41939	4.09052	4.12905	4.05262	4.30817	5.1425	4.0005	5.31833	4.33	5.753	4.511	4.107	4.10617	4.4315	4.24425
ABCC9	4.02167	4.57893	4.65702	5.06313	4.49567	4.16976	4.42378	4.70786	4.46865	4.56198	4.35933	4.10119	4.3931	4.50079	4.82816	4.14405	4.71358	4.6394	4.44762	4.26668	4.32913	5.6055	5.54067	5.3685	5.96762	5.70892	5.6655	5.8525	5.51417	5.80437	6.1845
ABCD1	5.17497	4.71437	4.8288	4.56286	4.95597	4.84492	4.91539	4.64286	4.88317	4.63794	4.96774	5.1823	4.62645	4.76575	4.65889	5.09401	4.8327	4.71909	4.82506	4.79484	4.83862	4.54554	4.66772	4.76917	4.59933	4.76929	4.71717	4.69117	4.7222	4.70933	4.57683
ABCD3	4.55218	4.78238	4.79183	4.74091	4.62908	4.78639	4.68079	4.79313	4.67563	4.77635	4.70714	4.7169	4.86647	4.6094	4.77288	4.68091	4.65738	4.74524	4.71878	4.58267	4.49143	4.657	4.82444	5.67017	4.97025	4.923	5.02437	5.0145	4.7985	4.75127	4.91717
ABCD4	5.61762	5.6604	5.74762	5.59496	5.61881	5.55103	5.6181	5.64198	5.58192	5.6075	5.57786	5.87595	5.58802	5.57881	5.6346	5.69175	5.64698	5.69315	5.62849	5.55992	5.61357	5.60067	5.564	5.26867	5.5209	5.65002	5.33483	5.55033	5.559	5.54267	5.63792
ABCE1	5.76187	5.94746	5.60532	5.58937	5.61643	5.6527	5.58742	5.70067	5.71117	5.73036	5.61194	5.69778	5.60175	5.60548	5.661	5.78924	5.65087	5.8275	5.61881	5.61962	5.75776	5.627	5.5335	5.84925	5.40281	5.484	5.60933	5.68375	5.5645	5.86283	5.5535
ABCF1	7.12127	6.96462	7.10524	6.95548	7.07062	7.13357	6.88869	7.1319	7.0619	6.8325	7.15	7.30433	6.95524	6.93571	7.09905	7.31571	7.04333	6.93833	7.14371	7.11456	6.93833	6.617	7.09683	7.3935	6.9535	6.99687	7.0835	6.95233	7.10892	7.024	6.96283
ABCF2	6.06452	6.15319	5.18167	6.18867	6.19095	6.36767	6.14921	6.25468	6.16754	6.20952	6.2571	6.43238	5.79399	6.19103	6.37722	6.54201	6.26614	6.02167	6.20726	6.29629	6.15067	6.2655	6.461	6.787	6.25262	6.36862	6.43367	6.393	6.5543	6.43367	6.255
ABCF3	8.11405	7.71778	7.56619	7.33079	7.40238	7.54605	7.49619	7.5246	7.45464	7.39008	7.52351	7.67976	7.47571	7.65286	7.48595	7.65845	7.54861	7.63611	7.43476	7.51262	7.42476	6.991	7.32083	7.26	7.1095	7.03212	7.155	7.12725	7.2055	6.8885	7.2515
ABCG1	7.93317	6.58548	7.23893	6.5486	7.27048	6.88813	7.47357	6.70099	6.52933	6.77667	7.11198	7.4025	7.01312	6.49127	6.74775	7.09794	6.73063	6.49038	7.40167	6.83218	6.99405	5.01133	7.00333	4.79329	6.689	5.81267	5.176	6.58575	7.09762	5.9595	7.0505
ABCG2	4.15817	4.17984	4.18091	4.27921	4.03548	4.25857	4.01802	4.33976	4.3053	4.15071	4.03063	4.75452	4.21712	4.42706	4.24079	4.40976	4.30921	3.98262	4.11738	4.43069	4.06841	4.4625	4.29	4.31192	4.12367	4.5195	4.1635	4.5015	4.225	4.61983	4.215
ABCG4	4.84258	4.04238	4.41619	3.86712	4.38825	4.51312	4.46516	4.4531	4.25738	4.0697	4.49929	5.76117	4.22762	4.35101	4.06905	4.54937	4.29905	4.32881	4.15788	4.55599	4.27149	4.06417	4.13873	3.984	4.096	4.078	4.1365	4.00122	4.0355	4.38025	4.01351
ABCG5	3.87667	3.89881	3.93119	3.92008	3.85706	3.89833	3.89714	3.9554	3.99381	3.92857	3.90881	3.94881	3.83542	3.82212	3.95347	4.00802	3.87921	4.00226	4.02308	3.93857	4.08968	3.95	3.8645	3.88633	3.9315	3.96829	3.9645	4.0105	4.012	4.0785	3.88633
ABCG8	3.80643	3.93087	4.15952	3.81405	3.86825	3.83857	3.9078	3.75897	3.76667	3.71883	3.64286	3.71563	3.9854	3.81214	3.78619	3.86833	3.64817	3.76452	3.85815	3.72968	3.87825	3.80983	3.773	3.91983	4.106	3.7175	3.8725	3.632	3.915	3.835	3.835
ABHD1	4.77198	4.65127	4.45528	4.62816	4.74246	4.68478	4.87824	4.77938	4.55853	4.89095	4.6325	4.94079	4.65873	4.80236	4.565	4.68607	4.87579	4.3594	4.8504	4.79484	4.71619	5.13183	4.5045	4.173	4.26979	4.5565	4.31042	4.352	4.46	4.55558	4.60017
ABHD10	4.05817	3.81671	3.82381	3.84556	3.66647	3.7379	3.60103	3.80273	3.56762	3.61321	3.86913	3.79077	3.755	3.64601	3.84135	3.85825	3.46405	3.68952	3.84948	3.76101	3.88714	3.7515	3.90387	3.57233	3.678	3.57467	3.699	3.58925	3.689	3.6995	3.7585
ABHD11	5.65427	5.86131	5.7244	5.8556	5.96706	5.87056	5.98063	6.02948	5.69758	6.07181	6.06258	6.10683	5.9054	5.88559	5.87409	6.11976	6.04119	5.78658	5.81615	6.02302	5.4031	5.5395	5.61617	5.87217	5.70533	5.51464	5.695	5.64281	5.58833	5.51867	5.79008
ABHD11-AS1	4.29	4.47754	4.20327	4.4073	4.4261	4.3104	4.22484	4.44357	3.89119	4.33	4.44656	4.35071	4.51161	4.35101	4.34937	4.38029	4.32016	4.23377	4.40746	4.37171	4.33976	5.50021	4.40598	4.33	4.341	4.14	4.24675	4.138	4.41862	4.369	4.0525
ABHD12	6.58615	5.87763	6.69502	6.00492	6.70742	6.46617	6.71504	6.51546	6.34889	6.43278	6.68476	7.00317	6.35004	6.36238	5.9305	6.97429	6.55992	5.80565	6.2169	6.68246	6.25667	5.37425	6.10139	5.72267	6.17383	5.635	5.8135	6.205	6.00933	5.37208	5.872
ABHD12B	3.81286	3.65587	3.7869	3.95956	3.90095	3.7379	3.69048	3.81976	3.8573	3.70334	3.89857	3.8327	3.89558	3.84279	3.96877	3.69516	3.79222	3.82984	4.06857	3.8881	3.74595	3.6255	3.725	3.78692	3.81567	3.88963	3.8265	3.761	3.7821	3.66533	3.901
ABHD13	4.04718	3.93087	4.15079	3.84556	4.30857	3.9081	3.81921	3.79052	4.01405	3.89833	3.90881	3.71563	3.81643	4.05738	3.9931	3.89938	4.11048	3.84095	3.98113	4.07079	3.80397	3.82	4.0005	4.2045	3.95125	4.195	3.9645	4.0365	3.81783	4.088	4.0805
ABHD14A	7.71619	7.69321	7.50675	7.55214	7.59647	7.72444	7.6323	7.75548	7.63627	7.55976	7.81452	7.98119	7.72016	7.49643	7.6253	7.11262	7.76595	7.59246	7.395	7.88881	7.74603	8.09413	7.40833	7.173	7.7415	7.94883	7.35525	7.674	7.4025	7.85817	7.784
ABHD14B	6.60508	5.85627	6.02452	5.97667	5.96204	6.01162	6.03667	5.89296	5.84984	5.69056	6.13196	6.04762	6.08527	5.94569	6.00109	5.97845	6.17397	6.01105	5.96079	6.0736	6.10837	5.9785	6.03	5.407	6.06467	6.116	5.94	6.07704	6.201	6.14075	5.98055
ABHD15	6.17004	5.71606	5.46964	5.43226	5.715	5.51829	5.66944	5.37079	5.43757	5.44327	5.61194	5.48333	5.55087	5.2031	5.31897	5.49893	5.4873	5.57444	5.58495	5.48591	5.55333	4.36021	5.08867	4.84017	5.193	4.849	4.9095	5.0145	5.091	4.96067	5.02715
ABHD16A	5.92619	5.5723	5.56079	5.35325	5.44306	5.57238	5.68798	5.49079	5.51845	5.49169	5.44306	5.65377	5.52238	5.60912	5.4773	5.70027	5.67079	5.62065	5.49504	5.68312	5.60581	4.9299	5.1925	5.2875	5.18	5.12327	5.20842	5.33567	5.264	5.08608	5.1355
ABHD16B	3.77875	3.93087	4.08849	4.3423	4.11393	3.89833	3.99427	4.13016	3.94505	4.02167	4.10119	4.17177	4.11837	3.91548	4.2304	4.05915	4.11048	4.40762	4.28857	3.88155	4.03929	4.10833	4.129	4.024	4.33	4.097	4.27767	4.3425	4.12733	3.9795	4.0805
ABHD17A	6.32619	6.18414	6.31689	6.34127	6.52097	6.54758	6.56229	6.5249	6.52469	6.37702	6.61656	6.79325	6.36324	6.5249	6.48583	6.72057	6.61906	6.16081	6.46632	6.63649	6.33384	6.3818	6.4462	6.5361	6.3102	6.4393	6.4509	6.303	6.4362	5.80437	6.5511
ABHD17B	5.4126	5.39321	5.19492	5.51183	5.54171	5.45205	5.39154	5.39659	5.4137	5.35052	5.37183	5.41698	5.25357	5.34476	5.44714	5.44581	5.26492	5.19845	5.20651	5.53286	5.54357	5.63779	5.35892	5.762	5.4658	5.57042	6.167	5.65067	5.43562	5.56667	5.507
ABHD17C	5.01395	5.27269	4.74595	4.94422	4.66575	4.94897	4.67421	4.74087	4.89048	4.86762	4.94952	4.79198	4.78775	4.87169	4.81857	4.83038	4.81619	5.22952	4.76425	4.82508	4.65968	4.117	4.71477	4.57683	4.4315	4.2355	4.38225	4.61321	4.41862	4.51517	4.8395
ABHD18	5.44186	5.06871	5.17151	5.15631	5.43246	5.2894	5.22198	5.12697	5.12129	5.24024	5.15202	5.12147	5.12887	5.32516	5.19048	5.10591	5.13329	5.02325	5.0419	5.1777	5.26445	5.3935	5.03593	5.23967	5.03746	5.2875	5.1665	4.928	5.04028	5.589	5.25558
ABHD2	5.29679	5.27269	5.8405	5.7558	6.20377	6.21429	5.89071	5.78673	6.04433	5.90646	6.15167	5.97056	5.57961	6.01325	6.13591	6.17912	5.88175	5.18009	6.035	6.13997	5.86599	5.203	5.8235	6.43758	5.60383	6.116	6.167	5.94867	5.656	5.7235	5.7235
ABHD3	5.97498	6.05989	5.98118	5.64135	5.72524	5.87595	5.84984	5.64821	5.83119	5.97373	5.70405	6.20968	5.95492	5.81413	5.4875	6.14475	5.765	5.60206	5.61397	5.96913	5.67504	5.0595	5.34454	4.79329	5.4715	4.91492	5.20842	5.5335	5.458	4.92075	5.33617
ABHD4	7.33685	7.19389	6.88349	7.25155	6.76905	7.13357	6.95548	6.56365	7.07631	6.98325	6.98476	6.86976	6.96405	7.10754	7.0006	6.72335	6.9219	7.18587	7.08	6.92503	7.03798	6.9685	7.06383	7.06358	7.0915	7.2085	7.46617	7.03917	6.9755	6.9405	7.199
ABHD5	6.93524	6.51016	6.08385	6.22881	6.15115	6.21429	6.29629	6.25468	6.41976	6.35369	6.35956	6.59996	6.21837	6.24659	6.11383	6.44363	6.08464	6.43119	5.9431	6.05989	6.24516	6.03217	6.862	6.8305	6.6585	6.2355	6.87542	6.67017	6.82367	5.8235	6.148
ABHD6	7.1675	6.7123	6.73933	6.42202	6.79476	6.7548	6.96587	6.73996	6.65738	6.61599	6.8156	7.11381	6.72357	6.68082	6.66254	7.02548	6.66767	6.69167	6.5486	6.81375	6.65792	5.7264	5.93	5.395	6.08567	5.625	6.03217	6.1155	5.94	5.52508	6.21254
ABHD8	8.0931	8.04103	7.80024	7.9381	7.98198	7.78218	8.09357	7.9402	7.75575	8.03976	7.93774	8.09214	8.1219	7.83	7.89833	8.04786	7.99944	8.00921	7.83794	7.9454	7.9381	7.369	7.5605	7.30665	7.46375	7.70083	7.63958	7.583	7.595	7.82075	7.717
ABI1	6.22881	5.86722	6.20012	5.95488	6.43119	6.13083	6.33824	6.0077	6.02413	6.23821	6.43652	6.47635	5.97667	6.14063	6.08458	6.48016	6.20149	5.87825	6.12817	6.37478	6.24516	5.969	5.873	6.20217	6.0065	5.92302	5.92992	6.1155	5.92983	6.19879	5.882
ABI3	7.3281	7.08897	7.09294	6.70619	6.86163	6.52847	7.09437	6.95772	6.77573	6.8046	6.72262	7.0831	6.98145	6.58968	6.63802	7.26095	6.88929	7.07619	6.50778	6.73571	7.33667	5.4015	6.8215	5.3075	6.36888	6.07442	5.695	6.40275	6.72833	6.094	6.35242
ABI3BP	4.87131	5.49493	4.93821	5.40036	5.3168	5.65841	5.04107	5.64821	5.16103	5.57365	4.9897	5.44578	5.5375	5.27444	5.04872	5.27004	5.49373	5.55036	5.65944	5.11	5.23873	5.96175	6.15517	5.4555	5.733	6.167	6.052	5.6052	6.118	6.094	5.75933
ABITRAM	5.57605	5.40548	5.24214	5.38071	5.60651	5.39302	5.3499	5.32571	5.42611	5.4569	5.38365	5.3753	5.37714	5.44952	5.4127	5.45735	5.45464	5.39222	5.31429	5.32571	5.23349	5.23525	5.22277	5.3375	5.26203	5.1195	5.32958	5.2925	5.31	5.5225	5.2495
ABL1	5.61762	5.43212	5.52976	5.46806	5.42778	5.60675	5.4121	5.46484	5.42163	5.4981	5.55833	5.6306	5.40536	5.34476	5.51437	5.49893	5.48148	5.41607	5.48905	5.50817	5.41056	5.52265	5.997	5.95804	5.60383	6.2258	5.79115	5.67467	5.85533	5.7465	5.611
ABL2	5.81504	5.49341	5.15381	5.36806	5.3168	5.41579	5.34147	5.52516	5.43757	5.49169	5.25867	5.48984	5.27302	5.40385	5.44197	5.56373	5.43589	5.47913	5.2796	5.19286	5.3394	5.10213	5.8044	5.22425	5.27168	5.603	5.34475	5.1445	5.81358	5.53775	5.62375
ABLIM1	5.56587	5.9256	5.9645	6.02302	5.88513	5.95286	5.99778	5.96421	6.07889	5.8999	5.91508	5.63163	5.95179	6.03959	6.09517	5.47423	5.80812	5.94802	5.88464	5.77821	5.97754	6.95267	6.68633	6.41642	6.51267	7.0215	6.75383	6.53708	6.70983	7.16833	6.7716
ABLIM2	4.92873	5.1399	5.06313	5.08367	4.77257	5.17561	4.9496	5.01508	4.75437	5.03899	5.02524	4.98679	5.3373	4.9856	5.20518	4.84754	4.86636	5.0659	4.87524	4.95796	4.92526	4.74267	5.26517	4.95733	4.84867	5.74167	4.94042	4.93395	5.23792	5.236	5.05933
ABLIM3	6.37465	5.99778	6.0469	5.86712	5.91389	6.23929	5.94443	6.00192	6.04433	5.94651	5.96778	6.08704	6.25167	6.14563	5.80548	5.867	5.99488	6.01105	6.15266	5.94921	5.8419	5.793	5.88333	5.2635	6.0355	5.8805	6.096	6.1285	5.92983	5.76617	5.98055
ABO	5.47016	5.235	5.11317	4.90889	4.9019	4.91329	4.99648	5.05851	4.90181	5.12255	4.87589	5.12662	5.02511	4.91987	4.86371	5.00964	4.80361	5.29381	4.8945	5.0119	5.05851	6.08592	5.0025	5.00067	5.0355	5.00067	5.00617	4.83	5.0675	5.02205	4.9685
ABR	7.4325	7.11167	7.50153	7.30698	7.35516	7.37	7.53881	7.51349	7.42972	7.22516	7.22536	7.70214	7.4219	7.48548	7.16405	7.54095	7.34325	7.16091	7.30119	7.21849	7.25913	7.3305	7.11075	7.0415	7.0915	7.544	7.236	7.112	7.05025	7.45217	7.2905
ABRA	4.15817	3.90976	3.95159	4.03059	4.44254	4.06821	4.18448	4.06824	4.28619	4.15071	3.92974	3.8773	4.35378	4.10405	4.18825	3.86833	3.95063	3.64881	4.40746	4.43863	4.06841	3.97475	4.1495	6.62308	4.6665	4.108	6.276	4.93867	3.85408	3.588	4.461
ABRACL	8.37799	8.46095	8.38298	8.29528	8.23694	8.09167	8.34417	8.24563	8.40119	8.33282	8.07786	8.57599	8.36714	7.91222	7.98869	8.56111	8.19452	8.50857	8.09595	7.9602	8.35357	6.7095	7.18025	7.38367	7.68433	6.35883	7.1788	7.536	7.15475	6.62067	7.74475
ABRAXAS1	5.36823	5.39143	5.32135	5.46357	5.47175	5.27143	5.46563	5.3499	5.32036	5.36796	5.43238	5.48333	5.40536	5.30361	5.44714	5.43238	5.40698	5.34734	5.34201	5.49639	5.43357	6.1735	5.28	5.87771	5.694	5.59292	5.72443	5.73954	5.264	5.997	5.65925
ABRAXAS2	5.2119	5.12227	4.6369	4.86064	5.18075	4.98786	4.97105	4.93337	4.90647	4.79109	4.9897	4.99036	4.98889	4.95014	4.91298	5.03851	4.83722	5.06138	4.99367	5.05798	4.72569	4.5785	4.77021	5.2635	4.8065	4.5015	4.9095	4.874	4.631	5.03887	4.56483
ABTB1	8.0931	8.27238	8.24167	8.21452	8.15556	8.02635	8.0031	7.99833	8.07024	7.9619	8.12952	8.17468	8.18667	8.11286	8.17881	7.83143	8.23095	8.235	8.0831	8.07329	8.1219	7.999	7.90475	7.349	7.825	8.1435	7.9705	7.855	7.94425	8.03025	8.14875
ABTB2	5.87634	5.74846	5.70811	5.65081	5.77552	5.91022	5.50381	5.47008	5.7869	5.56981	5.8001	5.3452	5.89349	5.80004	5.92195	5.19522	5.39848	5.63881	5.89798	5.51877	5.50722	6.27617	6.391	6.60633	5.92576	7.0105	6.64158	5.969	6.2645	6.7695	5.92633
ACAA1	8.24786	8.00024	7.91881	7.81738	7.88857	7.90452	8.02417	7.90024	7.9219	7.58448	7.93774	8.06151	7.83	7.96339	7.73032	7.97405	7.66333	8.00921	7.88024	7.9602	7.88952	7.5945	7.71717	7.56067	7.638	7.523	7.5725	7.64967	7.6655	7.7255	7.61658
ACAA2	7.03155	6.67381	6.85387	6.63373	7.15869	6.46617	6.63638	6.93678	6.92738	7.0604	7.04008	6.94619	6.88859	6.5754	6.24778	6.48952	6.65738	7.14881	6.84405	6.96841	6.73	6.3215	6.48325	6.65	6.9245	6.34	6.39349	6.65767	6.2745	6.4045	6.69925
ACACA	5.39302	5.75835	5.33052	5.73536	5.70865	5.80976	5.80337	5.69584	5.68357	5.62238	5.57666	5.79595	5.61572	5.73294	5.67849	5.8719	5.66413	5.69315	5.59371	5.60143	5.68405	6.1845	5.879	6.09012	5.84958	6.11	6.08075	5.847	5.94667	6.0835	5.9075
ACACB	4.97986	5.32395	5.18438	5.52206	5.24063	5.1377	5.30984	5.61437	5.08044	5.37583	5.26274	5.08853	5.61881	5.55554	5.4127	5.16746	5.4031	5.37095	5.40785	5.19857	5.54867	6.0486	5.5805	5.2575	6.7136	5.805	6.2355	6.617	5.714	5.879	5.9125
ACAD10	5.11119	5.2419	5.465	5.35325	5.32135	5.25246	5.40214	5.39127	5.34175	5.47583	5.36389	5.50619	5.35317	5.25757	5.36285	5.55841	5.3925	5.30984	5.35296	5.26992	5.49056	5.51617	5.26029	5.07075	5.34183	5.21275	5.195	5.36233	5.316	4.93683	5.3535
ACAD11	6.16028	5.86722	6.11582	5.93698	5.90845	5.91022	5.83698	5.89296	5.92534	6.08667	5.74377	5.65377	5.93429	6.08452	5.9305	5.6604	5.74724	5.95496	6.15676	5.94516	5.8419	5.9105	6.05067	5.9288	5.96762	6.293	5.959	5.9785	6.0413	5.9085	6.24525
ACAD9	6.91357	6.95667	7.35619	7.08516	6.99647	7.13964	7.32738	7.03988	7.33167	6.99524	7.10337	7.23849	6.98579	7.04238	7.07	7.34552	7.16385	6.94667	7.09437	7.14817	7.0303	7.09625	6.8695	7.291	6.943	6.9857	7.00817	6.92217	6.9915	6.76337	7.0435
ACADL	4.6377	4.36206	5.06754	5.06871	5.12214	4.60933	5.00141	4.33976	5.13158	4.17347	5.13158	4.10833	4.62925	4.79106	5.23135	4.20693	4.41939	4.40762	4.85986	5.3423	4.45306	6.62783	5.71967	6.797	5.94278	6.41269	6.7295	6.2261	5.5845	6.749	5.2135
ACADM	5.95302	5.87763	6.09504	6.32087	6.06476	6.14011	6.22387	6.06754	6.13532	6.04548	6.06986	6.11196	6.33945	6.13147	5.97579	6.0484	6.01317	6.01105	5.99818	5.99755	6.02706	6.28733	5.97008	6.2775	6.25262	5.96933	6.239	6.0505	6.00933	6.18292	5.96933
ACADS	5.10327	4.57462	4.7558	4.41619	4.89149	4.7823	4.99183	4.52242	4.89048	4.67794	4.90002	5.21206	4.40385	4.73456	4.6054	5.23444	4.97918	4.61683	4.80298	4.79484	4.85297	4.9299	4.64979	4.90017	4.60933	4.6065	4.58142	4.995	4.50229	4.52508	4.62933
ACADSB	5.40206	5.37754	5.83454	5.81552	5.75906	5.48357	5.78417	5.68381	5.72567	5.73925	5.76706	5.59437	5.63817	5.85206	5.92627	5.63536	5.765	5.38937	5.70048	5.81181	5.69048	6.2935	5.67317	6.12083	5.9085	5.97513	5.997	6.07704	5.66088	6.33175	5.882
ACADVL	9.47119	9.65802	9.28222	9.35071	9.34599	9.39333	9.32588	9.42071	9.44855	9.38452	9.11976	9.36528	9.39619	9.52881	9.24048	9.30147	9.375	9.64119	9.10988	9.35202	9.36012	9.48025	9.4185	9.3935	9.1985	9.7175	8.791	9.2033	9.4185	9.35283	9.3385
ACAN	6.33071	5.81298	5.99818	6.24968	5.58595	6.1773	5.84631	6.14506	6.12558	6.22381	4.9331	5.43333	5.99452	6.64883	5.52532	5.30968	5.70845	5.79956	5.85381	5.89802	6.27952	4.5785	5.82933	5.58079	6.28833	5.1585	6.02733	6.24592	5.88367	5.49517	5.879
ACAP1	4.27976	4.68438	5.11976	4.75647	5.14975	5.15341	5.17357	5.16351	5.06687	5.29337	5.20139	5.27621	4.98889	4.90071	5.16103	5.43238	5.31024	4.67171	4.84063	5.19857	5.4448	3.8385	4.92942	4.098	4.62475	4.11717	4.098	4.58263	4.787	3.9915	4.78933
ACAP2	5.85806	5.80732	5.94817	6.02508	5.99214	6.01162	5.90714	6.1219	5.86056	6.21877	6.01651	6.14198	5.9452	5.92476	5.89869	6.14475	6.05329	5.8275	5.91002	5.92476	5.9681	5.941	5.873	5.9288	5.7635	5.67467	5.74417	5.76715	5.85	6.1523	5.843
ACAP3	7.89984	7.94214	7.60778	7.44206	7.4948	7.6074	7.38119	7.65619	7.53071	7.25155	7.37075	7.54905	7.49548	7.55063	7.53286	7.62929	7.60726	7.80423	7.43476	7.53262	7.50675	7.83233	7.39258	7.4155	7.14433	7.888	7.53892	7.23683	7.39975	7.415	7.717
ACAT1	6.23786	6.14861	6.43119	6.43246	6.29889	6.49453	6.61879	6.36559	6.59735	6.27338	6.36294	6.34056	6.33945	6.5754	6.30718	6.38371	6.34481	6.15294	6.435	6.39825	6.38972	6.80067	6.67267	6.95583	6.596	6.8525	6.77663	6.65146	6.63483	7.13083	6.44321
ACAT2	6.52214	6.73156	6.70873	6.63373	6.67661	6.61528	6.82087	6.75238	6.8396	6.63847	6.66802	6.75179	6.66529	6.87864	6.56841	6.73152	6.72258	6.76437	6.55881	6.64825	6.79573	7.57137	6.53533	7.2215	6.348	6.7015	7.58325	6.4925	6.60642	6.87283	6.68092
ACBD3	5.70925	5.1995	5.36389	5.35325	5.51758	5.35833	5.31595	5.21214	5.46395	5.20237	5.33683	5.3366	5.11985	5.38742	5.14127	5.36085	5.34301	5.27067	5.31429	5.36984	5.21694	5.45067	5.09817	5.6765	5.2675	5.24583	5.6855	5.25988	5.21417	5.6665	5.08617
ACBD3-AS1	4.22042	3.97286	3.92098	3.87769	3.83905	3.78443	4.00688	3.89966	3.92552	3.89833	3.99214	4.00397	4.08849	3.95413	3.85167	3.90952	4.21913	3.85075	3.92143	3.97476	3.81135	3.894	3.967	3.9935	3.74467	3.83933	3.659	3.921	3.915	3.896	3.86592
ACBD4	4.92119	4.84352	4.64643	5.015	4.85954	4.80202	4.83381	5.05851	4.97812	4.74302	4.99921	4.87231	5.029	4.79106	4.98813	5.10591	4.87579	5.22952	5.09254	4.865	4.74383	4.96326	4.95771	4.9715	5.14967	5.12327	4.95478	4.928	5.091	4.6935	4.8175
ACBD5	5.43641	5.43212	5.63468	5.45937	5.3304	5.51437	5.54143	5.44456	5.47016	5.53589	5.47028	5.45083	5.68517	5.50419	5.42778	5.39143	5.33744	5.30304	5.50619	5.23929	5.72964	5.2435	5.46892	5.38313	5.37675	5.07833	5.11854	5.4175	5.27667	4.86433	5.2495
ACBD6	6.43246	6.87458	6.59879	6.98024	6.90528	6.84095	6.88869	7.0725	6.79794	6.91862	6.74393	6.83095	7.05214	6.92738	6.78476	6.92625	6.99472	6.80381	6.78365	6.94683	6.95706	6.907	6.59175	6.753	6.8085	6.5543	6.68525	6.7795	6.67817	6.74225	6.847
ACBD7	6.3026	5.9431	5.5501	6.05437	5.38431	5.44806	5.42294	5.67881	5.46395	5.6696	5.64526	5.76952	5.37186	5.19497	5.49897	5.72071	5.42504	5.81556	5.64362	5.3423	5.68405	6.34	5.81433	5.85542	6.31608	5.851	6.607	6.1155	5.638	5.6035	5.78325
ACCS	6.69286	6.76183	6.97234	7.04924	6.91056	6.97357	7.18738	7.19758	7.38095	6.96512	7.07	7.15	7.34258	7.03595	7.12333	7.67119	7.28944	6.78897	7.17857	6.94357	7.00599	7.43083	7.07475	6.553	6.826	7.294	6.896	6.82662	7.072	6.8155	7.60783
ACCSL	3.77	3.68365	3.80397	3.85603	3.80444	3.77333	3.65881	3.72524	3.75659	3.65452	4.39921	3.63702	3.78198	3.74992	3.96286	3.67536	3.79222	3.82984	3.7631	3.81214	4.1201	3.82	3.6865	3.671	3.7085	3.87333	3.85233	3.689	3.678	3.81433	3.63
ACE	5.54817	5.3622	4.97048	4.96094	4.92	5.00168	4.80302	4.88224	4.982	4.96762	4.90333	5.30177	4.81659	5.1119	4.77288	5.18302	4.93852	5.28345	4.93575	4.96119	4.90347	4.76158	4.91412	4.52867	4.78433	4.69887	4.80758	4.75092	4.8705	4.4725	4.73967
ACE2	3.63	3.79478	3.62369	3.48476	3.64857	3.64817	4.06744	3.58738	3.77508	4.03071	3.83071	3.79077	3.52619	3.69734	3.51183	3.84849	3.82984	3.82984	3.75321	3.54754	3.93097	3.64567	4.0209	3.753	3.941	3.93017	3.95438	3.972	4.0455	4.31042	3.826
ACER1	4.51565	4.53219	4.53687	4.53719	4.22754	4.25857	4.38972	4.33976	4.28619	4.41222	4.24994	4.53806	4.31833	4.13119	4.39825	4.6273	4.44091	4.86405	4.54285	4.37171	4.4269	4.4015	4.43283	4.1625	4.36021	4.5015	4.41367	4.46137	4.72717	4.442	4.266
ACER2	4.35599	4.41524	4.41619	4.49325	4.37806	4.3104	4.45929	4.43429	4.34206	4.4996	4.37262	4.45583	4.50086	4.17794	4.39825	4.37087	4.51758	4.5821	4.50894	4.41524	4.46873	4.3085	4.45329	4.445	4.524	4.72533	4.46767	4.4335	4.57744	4.5755	4.3205
ACER3	4.68079	4.75111	5.06754	4.65897	4.74246	4.91974	5.12183	4.88817	4.81063	4.82728	5.03774	5.31833	4.89359	5.00603	4.66393	5.3224	5.0074	4.68063	4.76425	5.07516	4.87838	4.088	4.62063	4.63867	4.6475	4.40491	4.61242	4.735	4.649	4.908	4.59
ACIN1	6.72082	7.30302	6.17833	7.07	6.61726	6.80042	6.83024	6.97573	6.84798	6.89452	6.36776	6.73607	7.14952	6.89833	6.79119	6.4052	6.61656	7.01349	6.70938	6.25726	6.93833	6.68908	6.7912	6.33717	6.6585	6.61608	6.32475	6.6365	6.8695	5.844	6.69925
ACKR1	5.04246	5.73754	5.18167	5.09865	4.52333	5.04413	4.48208	4.85722	4.26659	5.51371	5.27889	5.06342	4.81659	5.14849	5.78849	5.48157	5.06075	5.6877	4.65548	4.90167	5.37437	6.0215	6.9805	6.66033	7.25183	7.0415	6.804	7.3585	6.847	7.27867	6.804
ACKR2	4.29905	4.00095	4.0675	3.95956	3.71119	4.17905	3.99427	4.20706	3.73897	4.02167	4.15881	4.09754	4.17722	3.8969	4.20853	4.06857	3.9619	4.01151	4.0524	3.70929	3.9927	6.10333	4.1935	4.184	4.25333	4.24567	4.145	4.164	4.184	4.369	4.215
ACKR3	8.02429	8.26056	7.82679	8.28571	8.20167	8.23675	7.83095	7.83913	7.99119	7.60679	8.01433	7.41357	7.59679	7.89909	8.14429	7.61619	7.89	8.14563	7.96419	7.59647	8.09167	8.88825	9.5535	9.515	8.9465	9.8285	9.46825	9.057	9.384	9.7105	9.17
ACKR4	5.72786	5.77897	6.16746	6.32087	6.66579	6.02262	5.94443	5.86433	6.34889	5.84764	6.08868	5.59437	6.00071	6.02444	6.31817	5.35238	5.93635	5.86798	6.31	6.37478	6.09788	7.7535	6.93283	7.839	7.17467	7.324	7.8905	7.285	6.96592	7.12767	7.31975
ACLY	6.4004	6.2871	6.3095	6.15925	6.24802	6.26617	6.28567	6.27233	6.26917	6.27917	6.23532	6.40434	6.21837	6.31905	6.28143	6.4052	6.35389	6.36935	6.40603	6.2463	6.48504	5.47283	6.33083	6.39383	6.075	6.293	6.37533	6.1735	6.35858	6.393	5.96933
ACMSD	3.69152	3.70286	3.87647	3.85603	3.74754	3.79516	3.71151	3.92214	3.85326	3.82444	3.92974	3.843	3.88548	3.74992	3.78619	3.58881	3.87921	3.65817	3.82714	3.69548	3.55595	3.885	3.8435	3.773	3.656	3.7575	3.761	3.8012	3.837	3.896	3.6495
ACO1	6.71276	6.67381	6.40619	6.15925	6.59735	6.498	6.46968	6.31214	6.59024	6.3427	6.54238	6.62675	6.31044	6.35226	6.42929	6.75119	6.35389	6.59714	6.23788	6.43028	6.27367	5.83683	6.57823	6.553	6.348	6.4325	6.541	6.48167	6.617	6.5385	6.1275
ACO2	8.37008	8.29333	8.16774	8.0823	8.13286	8.15012	8.0031	8.03587	8.18952	7.98611	8.12952	8.18071	8.1219	8.31048	8.10937	8.2844	8.1204	8.31452	8.06913	8.105	8.19155	7.83233	7.9985	8.016	7.8415	7.953	8.0105	7.89	8.088	7.875	7.92
ACOD1	4.0669	4.03171	3.7831	3.76143	3.9954	3.80545	3.93588	3.96488	3.86394	3.99214	3.89857	4.03667	3.69476	4.05738	3.69845	3.89938	4.11048	3.75359	3.79505	3.97476	4.21034	3.85767	3.8645	3.8465	3.963	3.93017	3.8017	3.961	4.21525	4.18525	3.618
ACOT1	8.57889	8.4506	8.02258	7.9123	8.28742	8.04943	8.11833	7.74071	8.31016	7.71972	8.19254	8.08052	8.15254	8.00012	7.75111	8.5503	7.97357	8.4331	7.80226	8.28357	7.88024	7.9435	7.7015	8.2	7.972	7.98367	7.92767	8.144	7.70083	8.29658	7.735
ACOT11	5.74326	5.56464	5.79815	5.92571	5.6373	5.89832	5.92651	6.1177	6.16246	5.91905	5.83937	6.36486	6.03754	5.89296	5.85313	6.21335	6.11196	5.7502	6.19684	5.98847	5.80702	5.56658	5.473	5.16967	5.57275	5.41546	5.272	5.40717	5.6052	5.07133	5.614
ACOT12	4.12833	3.77357	3.82381	3.95956	3.78683	3.97171	3.80875	4.02821	3.82452	4.12111	3.92974	3.79077	3.91585	3.93471	4.00242	3.90952	3.93959	3.95115	3.84948	4.1354	3.84054	3.875	3.773	3.79387	4.012	4.022	4.006	3.85029	4.225	3.792	3.81695
ACOT13	8.13238	8.00921	8.01294	7.85643	8.01452	8.08052	8.2654	8.19317	8.02905	8.20381	8.02603	8.23274	8.27452	7.88639	7.38071	8.3129	8.30786	8.13286	7.99206	8.14563	8.18405	7.30625	7.33192	6.85008	7.4165	6.71233	6.8155	7.41417	7.482	6.90883	7.64833
ACOT4	7.13976	6.09567	6.127	5.55754	6.24802	6.29119	6.34841	5.68786	6.28988	5.93887	6.2571	6.6169	6.02871	6.08452	5.4875	6.79976	5.99488	6.03226	6.035	6.23758	5.92768	4.6315	4.95771	4.82317	5.615	4.3415	4.99883	5.55567	4.8975	4.0985	5.35633
ACOT6	3.88738	3.81671	3.34619	3.86712	3.98762	3.69435	3.80198	4.02821	3.70929	3.89833	3.99214	3.92837	4.12881	3.88556	3.51183	3.80488	3.54643	3.60476	3.99252	3.85167	3.67833	4.012	4.068	3.8465	3.982	4.184	3.771	3.761	3.84567	3.826	3.79733
ACOT7	6.50746	6.31849	6.54754	6.51917	6.56722	6.88813	6.57667	6.62024	6.78437	6.36309	6.65769	6.44581	6.5973	6.63246	6.57957	6.89103	6.7626	6.2634	6.77107	6.75585	6.69972	5.7264	6.255	6.60633	6.13575	6.15025	6.49975	6.07704	6.23134	6.173	6.09829
ACOT8	5.70925	4.98867	4.69766	4.61603	4.86747	4.80202	4.95906	4.62794	5.12129	4.74302	4.8004	5.10234	4.78775	5.07865	4.94503	4.89385	4.81619	4.72286	4.73079	4.96973	4.67894	4.56629	4.65825	4.756	4.6475	4.3765	5.01602	4.8275	4.60113	4.8175	4.53767
ACOT9	7.21337	7.09286	7.22111	7.16579	7.10171	7.22778	7.21337	7.18135	7.14071	7.1604	7.2369	7.27179	7.22115	7.14222	7.0906	7.35516	7.185	7.13167	7.1631	7.21919	7.29476	7.09625	7.31625	7.507	7.2055	7.375	7.53475	7.195	7.355	7.05775	7.09033
ACOX1	7.21837	7.46484	7.36714	7.28246	7.35262	7.42393	7.42853	7.34889	7.38095	7.0381	7.40325	7.46095	7.38556	7.46	7.27563	7.27893	7.35262	7.39202	7.3269	7.31389	7.125	7.349	7.3085	7.57137	7.50517	7.734	7.421	7.41417	7.40833	7.562	7.402
ACOX2	5.65873	5.93067	6.127	6.37313	6.09452	6.18365	6.07623	5.99627	6.22129	5.95286	6.1771	5.73207	6.15754	6.39802	6.28143	5.72071	6.04548	5.99155	6.25016	6.27021	5.80702	6.763	6.042	6.3268	6.28222	6.4325	6.48717	6.303	6.09233	6.3195	6.4945
ACOX3	5.83532	5.5723	5.5501	5.52206	5.39282	5.43159	5.63801	5.62929	5.57647	5.56981	5.67861	5.8306	5.39848	5.60912	5.51909	5.36984	5.70845	5.6877	5.67366	5.43246	5.54357	5.563	5.74675	5.614	5.634	5.9785	6.23101	5.34475	5.79443	6.01808	5.62737
ACOXL	3.9081	3.9377	3.83976	3.93079	4.03151	3.88103	3.87056	3.88349	3.84802	3.84262	3.81549	3.8773	3.80397	3.92109	4.11325	3.80087	3.88905	3.76032	3.71651	3.89706	3.95222	4.04833	4.02383	3.73225	3.86375	3.86633	3.85233	3.93417	4.017	3.84117	3.8065
ACOXL-AS1	3.51905	3.74347	3.86656	3.84556	3.67254	3.56786	3.83849	3.67214	3.6719	3.96008	3.65272	3.64817	3.7631	3.68714	3.53381	3.70929	3.78252	3.80857	3.71119	3.72968	3.42571	3.354	3.489	3.68955	3.699	3.518	3.74967	3.64217	3.689	3.62729	3.659
ACP1	5.99099	6.08554	6.34361	6.11706	6.11302	6.00595	6.15851	6.07802	6.08266	6.15825	6.22139	6.26992	6.05849	6.04611	5.99518	6.38663	6.15079	6.07432	6.13202	6.02581	6.02238	6.31517	6.0005	6.28733	6.144	6.12383	6.11667	6.11783	6.02733	6.04788	6.09367
ACP2	5.40859	5.00552	5.52976	5.18167	5.65796	5.65913	5.80337	5.3354	5.63187	5.53589	5.81016	5.99095	5.33831	5.48353	5.4225	6.27011	5.70405	4.92159	5.39143	5.69494	5.31715	4.378	4.984	4.65	4.95175	4.765	4.78033	5.156	5.01267	4.234	4.92192
ACP4	4.0669	4.02095	4.27214	4.2373	4.17643	4.21717	4.02841	4.23421	4.20881	4.41222	3.94865	4.30942	3.77286	4.1129	4.28929	4.59137	4.21913	4.15786	4.24698	4.1354	4.27149	4.291	4.25142	4.268	4.1535	4.30125	4.2895	4.0365	4.39933	4.1085	4.0525
ACP5	11.4563	11.5212	11.3957	11.0577	11.4502	11.4307	11.7421	11.375	11.8592	11.1946	11.312	12.1545	11.1157	11.4256	10.5046	11.759	11.6233	11.5212	10.8429	11.312	11.6938	8.01608	10.7575	5.64608	10.4808	6.50988	8.5665	10.4355	10.6653	6.65317	10.238
ACP6	4.45929	4.46643	4.41619	4.2591	4.19603	4.55774	4.35911	4.22762	4.57071	4.05929	4.38853	4.26365	4.44421	4.5225	4.54413	4.3294	4.37963	4.22574	4.25767	4.20169	4.28226	4.72533	4.70617	5.02092	4.53092	4.6065	4.675	4.78575	4.69887	4.8075	4.5265
ACP7	6.53278	5.54357	5.49829	5.60159	5.49337	5.42163	5.42294	5.44063	5.61786	5.43333	5.82621	6.02761	5.12887	5.44578	5.34147	5.94468	5.58758	5.67703	5.51643	5.8674	5.6674	5.60067	5.5865	5.5045	5.50042	5.81267	5.4984	5.5335	5.5845	5.14675	5.34733
ACPP	4.1731	4.25968	4.00286	4.05729	4.0019	3.90095	3.86571	3.96488	4.01024	4.14119	4.05065	4.205	3.88016	4.33762	3.98742	4.01913	3.91984	4.32162	3.90714	4.13024	3.87825	3.7935	4.01483	3.907	4.047	3.7485	3.94987	4.00417	3.91	3.6765	3.921
ACR	4.01254	4.21722	4.23563	4.21034	4.00139	4.17468	4.1331	4.22921	4.24742	4.16157	4.17516	4.17604	4.20222	4.11857	4.22339	4.20119	4.08381	4.22073	4.18087	4.1694	4.08579	4.33767	4.1935	4.47533	4.38767	4.24267	4.43417	4.33658	4.12983	4.15367	4.33267
ACRBP	6.80913	6.1426	5.61655	5.70405	6.08444	5.91022	5.96471	5.87587	5.4756	5.93887	5.83558	6.91484	5.92405	5.89762	5.96579	6.15754	6.15491	5.80565	5.8419	6.17782	6.27367	4.52093	5.38633	4.225	5.88067	4.70483	4.9095	5.94	5.3005	4.411	5.02715
ACRV1	3.81836	3.8481	3.95159	3.92008	3.80444	3.79516	3.96472	3.83635	3.76667	3.95024	3.44214	3.65573	3.66075	3.78151	3.91397	3.81631	3.69786	3.77452	3.74349	3.64298	3.88714	3.7515	3.725	3.88633	3.7735	3.7175	3.72	3.972	3.678	3.81433	3.86592
ACSBG1	3.74754	3.78071	3.98563	3.96381	4.0019	3.76667	3.80875	3.90714	3.80048	3.96381	3.85548	3.9651	4.05929	3.96317	3.867	3.75861	4.24587	3.79365	3.77841	3.81762	3.96557	3.917	3.837	3.9785	3.8845	3.953	4.006	4.056	3.79567	3.9315	3.977
ACSBG2	4.24198	4.14111	4.14099	4.2591	4.03548	4.06821	4.01802	4.08865	4.14897	4.13146	4.13024	3.93929	4.13843	3.97333	4.00242	4.07929	4.02167	4.04065	3.96119	4.1181	3.74988	4.312	4.13873	3.951	3.922	4.28	4.0365	4.1275	4.0455	4.24558	4.16322
ACSF2	6.61583	6.05024	5.97135	5.46357	6.06476	5.86532	5.87702	5.92472	5.87256	5.70037	6.04879	6.34056	5.97667	5.83349	5.7166	6.25929	6.01317	5.96435	5.81944	5.95365	6.02706	5.15892	5.73187	4.804	5.3725	5.46667	5.432	5.50683	5.6275	5.54267	5.41729
ACSF3	6.41786	5.98488	6.0646	5.88302	5.91516	5.94652	5.91042	5.95205	5.99405	5.87141	5.97857	6.2419	6.08527	5.89296	5.9581	6.28119	6.03086	6.05486	6.00683	5.92476	6.04548	5.5275	5.82933	5.753	5.7165	5.78321	5.78887	5.706	5.82421	5.54267	5.847
ACSL1	8.49774	7.3619	7.54841	7.08881	7.42369	7.44464	7.3144	7.57	7.16133	7.75111	7.61099	7.71379	7.33111	7.48873	7.33786	7.74167	7.26143	7.26952	7.48548	7.48873	7.29853	6.502	7.43067	6.54217	7.6045	6.75025	7.0415	7.68433	7.43592	6.79796	7.0985
ACSL3	6.24873	6.13222	6.44138	6.36206	6.46354	6.24614	6.37087	6.08754	6.31044	6.32515	6.5004	6.25565	6.02119	6.35226	6.40754	6.57111	6.25413	6.2634	6.2169	6.44138	6.23577	7.135	6.3595	6.81467	6.7285	6.67892	6.8575	6.65767	6.222	7.405	6.36425
ACSL5	7.49933	7.65933	7.4306	7.51333	7.54214	7.56444	7.43702	7.4773	7.49768	7.58448	7.51167	7.66778	7.55002	7.46921	7.53286	7.71881	7.60726	7.75913	7.23143	7.43262	7.71337	6.991	7.3085	6.54217	7.40933	7.052	6.67058	7.349	7.369	6.70942	7.5745
ACSL6	4.00845	4.80413	4.11071	3.9921	4.1322	3.85929	4.19556	4.06824	4.09838	4.09167	3.92058	4.00397	4.03413	4.1129	4.19794	3.95238	4.15042	3.93929	4.13901	3.97476	4.08968	4.06417	4.129	3.898	3.982	4.16342	4.078	4.107	3.922	4.2165	3.9645
ACSM1	4.09696	3.90976	4.14099	4.07952	3.8881	4.01054	4.10833	3.9554	4.13873	3.91786	4.10119	3.9081	4.07817	4.91987	4.16742	3.93119	4.11048	3.85075	4.1881	4.31111	4.09976	4.35133	4.068	4.3205	4.225	4.26833	4.056	4.29628	3.985	5.09372	3.95175
ACSM2A	4.00845	3.94071	3.75405	3.80385	3.77556	3.7569	3.98429	3.97506	3.80452	3.65452	3.69476	3.69254	3.68714	3.71841	3.87266	3.71952	3.69786	3.73327	3.50595	3.76101	3.6719	3.8385	3.6985	3.866	3.7085	3.617	3.771	3.85029	3.837	3.81433	3.6495
ACSM2B	3.87667	4.05504	3.95159	4.00179	3.67254	4.08683	3.79107	4.14921	4.09838	4.13146	3.88016	4.07952	3.64548	3.82212	4.2304	3.98563	3.79222	4.07976	4.01286	4.02292	4.65968	3.9035	3.7625	3.8135	3.80283	3.8845	4.006	4.107	4.012	3.92917	3.895
ACSM3	3.92929	3.97286	4.07762	4.41619	4.09167	4.21717	4.01802	4.14921	4.0231	4.26857	4.07052	3.94881	4.01286	4.22754	4.18825	3.90952	4.07929	3.9298	3.99252	4.1	4.19881	4.098	4.0375	4.03578	4.0433	4.05633	4.0165	4.155	4.0355	4.22667	4.0525
ACSM4	3.64262	3.58833	3.5256	3.74	4.24587	3.80545	3.71151	3.83635	3.54714	3.98063	3.69476	3.53345	3.87619	3.6748	3.54667	3.72992	3.82984	3.79855	3.55389	3.965	3.70286	3.6255	3.922	3.57233	3.823	3.584	3.628	3.7815	3.80783	3.649	3.7675
ACSM5	5.23071	4.97075	5.33984	4.87774	5.37873	5.42766	5.62339	5.30246	4.92405	5.17357	5.1777	5.76952	5.40536	4.9244	5.00325	5.68583	5.31024	4.99917	5.12115	5.7694	5.31893	4.778	4.902	4.25133	5.27792	4.6905	5.08667	5.42167	4.96058	4.1535	4.75105
ACSM6	3.9727	3.9944	4.08131	3.86144	3.8431	3.78443	3.85222	3.77302	3.83369	4.07694	3.98339	3.82183	3.79919	3.8371	3.95347	3.83254	3.81643	4.15123	3.90794	3.78087	3.94849	4.53725	4.05217	4.44367	3.85503	3.895	4.08525	3.90798	3.90467	3.88092	4.00877
ACSS1	5.88559	5.62702	5.68508	5.84873	5.77552	5.74401	5.81287	5.86433	5.68357	5.80343	5.78642	5.91633	6.1169	5.73294	5.73536	5.89369	5.76952	5.54069	5.6044	5.69619	5.7973	5.593	5.73942	5.51503	5.6565	6.02383	5.50579	5.77367	5.7235	5.5855	5.86846
ACSS2	6.73774	6.47067	6.26125	6.15012	6.22763	6.22468	6.38167	6.02948	6.37091	6.14081	6.2571	6.53746	6.30175	6.47302	6.34056	6.3768	6.11762	6.3953	6.19684	6.3181	6.20149	6.617	6.494	6.68	6.40067	6.791	6.76125	6.4925	6.5025	6.76017	6.24525
ACTA1	4.23238	4.21127	3.94157	3.94063	3.95024	4.05762	4.04855	3.93238	4.03548	3.96008	4.05065	3.96024	4.19754	3.95413	4.04238	4.01913	4.03175	4.2625	4.11738	4.20169	3.89302	4.69417	4.47233	5.70483	4.115	5.2545	5.30096	4.2575	4.40883	4.666	4.4819
ACTB	10.8059	10.9352	11.176	10.9976	10.7567	10.8429	10.8082	11.1071	10.8429	10.9205	10.8468	10.8391	10.9882	11.0577	10.8902	10.8195	10.8627	10.9093	10.954	10.7467	10.9299	10.9655	10.939	11.0735	10.8097	11.0108	11.135	10.838	11.0108	11.1085	11.0335
ACTBL2	7.47571	7.2673	7.81409	7.89956	7.81143	7.74071	7.83095	7.65619	7.99119	7.64643	7.70929	7.38421	7.76016	7.6156	8.14429	7.78655	7.6169	7.27841	8.26508	8.14563	7.59627	8.728	8.38275	9.17725	8.6445	8.992	9.2865	8.72	8.38275	8.47867	8.1595
ACTC1	3.92929	3.74347	3.84409	3.59857	4.07146	3.61905	3.97496	3.79052	4.11944	3.7731	3.68667	3.74303	3.79016	4.03802	3.69845	3.82748	3.67952	3.91024	3.89952	3.87262	4.04867	4.14692	4.29	4.21533	4.02267	4.2055	4.06583	3.921	3.9745	4.4838	4.318
ACTG1	9.65595	9.61208	9.43706	9.81298	9.77093	9.79449	9.61368	9.74024	9.82905	9.67894	9.79449	9.30655	9.58071	9.89413	9.78714	9.88143	9.79612	9.68524	9.98206	9.89952	9.64452	9.343	9.4815	9.87275	9.456	9.44217	9.816	9.57475	9.438	9.43725	9.643
ACTG1P17	4.84258	4.39833	4.41619	4.49971	4.45338	4.5396	4.56631	4.55978	4.26659	4.54008	5.19151	4.69027	4.47859	4.36942	4.52179	4.56937	4.54909	4.64427	4.50216	4.37171	4.50587	4.27329	4.0209	4.10813	4.1535	4.33	4.3	4.412	4.12733	4.088	4.442
ACTG1P20	10.753	10.744	9.90369	11.0182	10.8926	10.7028	10.5226	11.0295	11.0129	10.7147	10.9753	10.5805	11.0015	10.8352	10.71	10.7695	10.7054	10.9929	11.0811	10.9093	10.5563	10.4298	10.6355	10.7544	10.8419	10.803	10.8097	10.695	10.573	10.204	10.7381
ACTG1P4	7.27302	7.32409	7.17595	7.15595	7.31429	7.10853	9.00389	7.14103	7.23476	7.02885	7.29714	6.73607	7.11	6.70063	6.9731	7.22992	6.66767	7.45262	7.49595	7.26095	6.77563	6.56667	7.06383	7.296	7.222	7.11883	6.95429	7.03917	6.7895	6.8155	6.709
ACTG2	6.98421	6.72492	6.92802	6.72262	6.97381	6.30127	6.98171	7.01595	6.96724	6.77667	6.70399	6.28849	7.07313	6.8046	7.53286	6.5004	6.89548	6.65841	7.30802	7.3169	6.73	8.78425	7.8835	8.37025	7.97675	8.607	8.74725	8.036	7.89425	7.82075	7.64833
ACTL10	5.16159	5.36731	4.95775	5.06871	5.26492	5.18254	5.15468	5.05851	5.20139	4.95161	5.18183	5.26803	5.35317	5.14849	5.16103	5.2956	4.9585	5.35831	5.25621	5.1131	4.89048	4.641	4.902	5.6765	5.13083	5.0595	4.99883	5.156	4.923	5.03887	4.8395
ACTL6A	6.67405	6.79198	6.76786	6.82095	6.73024	6.7246	6.84962	6.80287	6.78437	6.74016	6.75817	6.62675	6.72357	6.76728	6.73917	6.84071	6.77361	6.81516	6.77107	6.72313	6.71791	6.763	6.6345	6.9145	6.596	6.4836	6.69	6.62533	6.617	7.05192	6.65079
ACTL6B	4.32952	4.67475	4.83603	4.51667	4.46476	4.55774	4.30929	4.5403	4.47494	4.39988	4.42706	4.47822	4.21712	4.27226	4.47159	4.45385	4.4002	4.57103	4.52405	4.29083	4.66884	4.50071	4.47233	4.43075	4.50167	4.617	4.76562	4.42117	4.4305	4.4725	4.64979
ACTL7A	4.19901	4.00095	4.11071	3.90993	3.92317	4.05762	4.07762	4.20706	4.19929	3.93929	4.15881	4.10833	3.99381	3.86532	4.00242	4.30933	3.86913	4.30952	4.09524	4.15401	3.9173	3.99283	4.1495	4.4205	4.3	4.225	4.19825	4.107	4.1465	4.2085	4.0525
ACTL7B	3.63	3.74347	3.77339	3.89881	3.67254	3.7379	3.57262	3.73748	3.84283	3.89833	3.7236	3.76738	3.79919	3.79087	3.87266	3.86833	3.81214	3.73327	3.97266	4.0619	3.72643	3.7515	3.6445	3.907	3.7845	3.8	3.659	3.88713	4.1945	3.649	3.8065
ACTL8	4.15817	4.22238	4.03548	4.17791	4.07146	4.09536	4.05746	4.20706	4.03548	4.17853	4.16937	4.23548	4.22762	3.98024	4.1445	4.14405	4.04933	4.28099	4.35542	4.00937	4.13619	4.0485	4.0005	4.227	4.23183	4.28	4.2035	3.91354	4.22008	4.1425	4.16783
ACTL9	3.8681	3.86833	3.82381	3.76143	3.9954	4.06821	3.88726	3.88931	3.95496	4.02167	3.7236	3.98212	3.86635	3.79087	4.02238	4.01913	3.99143	4.04913	3.87825	3.86119	3.98262	3.9655	4.04754	3.97267	3.7845	4.067	3.9645	3.941	4.00283	4.138	3.931
ACTN1	9.0506	8.76905	8.68267	8.75905	8.60671	8.69321	8.89476	8.69692	8.945	8.36814	8.71944	8.2654	8.83627	8.83955	8.93536	8.46095	8.55516	8.82726	8.95821	8.64143	8.4956	9.32235	9.37283	9.9085	8.95767	9.8285	9.5875	8.9105	9.438	9.16267	9.07142
ACTN1-AS1	4.4504	4.40881	4.02271	4.4073	4.38825	4.22821	4.38972	4.32885	4.43654	5.47016	4.27976	4.20909	4.557	4.36942	4.24079	4.29881	4.37083	4.40762	4.37659	4.41905	3.98262	5.364	4.31	5.3075	4.46133	4.75983	4.7335	4.46137	4.4855	4.6935	4.58037
ACTN2	4.11817	4.10024	4.05738	4.05998	3.97786	4.12454	4.21449	3.9554	4.41262	4.05929	4.12024	4.10833	3.8073	4.37786	4.48063	3.89938	3.87921	4.1446	4.075	4.1354	4.04867	5.6545	5.22277	5.53779	4.47125	6.08533	5.12188	4.37154	5.091	6.06267	4.461
ACTN3	5.09214	4.67475	4.58599	4.95597	4.89149	4.89909	4.92028	4.7503	5.11167	4.59498	4.93976	4.65935	4.76673	4.77088	5.0819	5.08127	4.60762	4.68063	4.95234	4.94981	4.56103	4.8975	5.39842	6.0655	5.0015	5.695	5.576	4.995	5.48033	5.27233	4.8175
ACTN4	7.78405	7.42452	7.87952	7.72929	7.83119	7.9169	7.78655	7.46738	7.93984	7.41351	8.01433	7.2473	7.76016	7.91222	8.05119	7.49548	7.64869	7.47667	8.02349	8.105	7.68083	8.2	8.3565	8.96	8.20717	8.97425	8.803	8.2815	8.3955	8.47867	8.028
ACTR10	5.36823	5.1995	5.08757	5.35325	5.57532	5.30175	5.30405	5.00921	5.33137	5.04254	5.33683	5.27621	5.22258	5.38742	5.19048	5.42175	5.32058	5.16607	5.18111	5.35222	5.00151	5.3935	5.21168	5.74367	5.32644	5.2192	5.74417	5.44317	5.21417	5.7335	5.1445
ACTR1A	7.67024	7.52905	7.13976	7.34536	7.305	7.47333	7.35357	7.39357	7.40161	7.30329	7.43214	7.61619	7.33111	7.4369	7.44845	7.5269	7.47667	7.44421	7.47504	7.32389	7.34563	6.804	7.45267	7.57137	7.17467	7.553	7.55283	7.306	7.44342	7.29858	7.0985
ACTR1B	6.84119	6.59472	6.79651	6.81051	7.05071	6.93143	7.0031	6.83119	6.85976	6.85476	7.04008	6.74405	6.69167	6.81448	7.00952	6.98452	7.13706	6.63373	7.10659	7.01925	7.0781	6.934	6.83333	7.31783	7.0425	7.18267	7.1788	6.94325	6.9203	6.826	7.1095
ACTR2	5.8999	6.08103	6.39698	6.20413	6.23762	6.15448	6.28115	6.43421	6.30619	6.39609	6.23532	6.28849	6.5819	6.41254	6.23836	6.40913	6.34849	6.15754	6.25873	6.2463	6.36468	6.06367	6.014	5.793	5.98142	5.8345	6.00629	6.0165	5.92983	5.82875	5.97655
ACTR3	8.76825	8.50905	8.63044	8.67925	8.58893	8.53651	8.54561	8.69692	8.59349	8.69905	8.68411	8.53714	8.53238	8.75619	8.51976	8.7944	8.59391	8.53563	8.6331	8.67508	8.86595	8.1535	8.12975	8.56837	8.104	7.972	8.419	8.19025	8.15385	8.522	8.24
ACTR3B	4.99464	4.98238	4.95008	4.90333	4.87194	4.79484	4.89261	4.85722	4.83103	4.82728	4.96774	5.04845	4.90815	4.77088	4.93821	4.90079	4.86968	5.02817	4.83405	4.87079	4.90071	4.99183	5.00617	5.2635	4.90917	5.05267	4.8784	4.94183	4.96215	4.92075	4.87267
ACTR3BP2	3.79833	3.8056	3.90952	3.81405	4.09167	3.92806	4.08852	3.88931	4.09838	4.03929	3.94865	4.09754	4.03413	3.78151	3.9931	3.86833	3.9619	3.96272	3.96119	4.03444	4.32913	4.0455	3.875	3.984	3.86375	4.067	4.056	3.972	3.90467	3.8755	3.895
ACTR3C	4.00845	4.02679	4.08131	4.09306	3.98254	4.02238	4.17849	4.06824	4.06175	4.0781	4.1494	4.14348	4.01595	4.05016	3.98833	4.08746	4.06639	4.01532	4.00504	4.15889	3.9881	4.04333	3.93517	4.04992	3.99867	4.01483	4.10225	3.91333	3.99467	4.01417	3.982
ACTR5	4.55218	4.84352	4.94847	4.89195	5.01563	4.86353	5.00141	5.10667	4.91833	4.80906	4.91987	4.88224	4.60984	4.97999	4.92167	4.79877	4.99749	4.76563	4.90079	4.96973	4.75381	4.78908	4.70617	5.2005	4.70875	4.4425	4.94475	4.7245	4.8705	4.87067	4.87733
ACTR6	6.01409	6.02413	6.05286	6.23875	6.29377	6.01162	6.30821	5.8152	6.11582	5.97373	5.97857	5.76952	6.05849	6.13147	5.95532	5.92673	5.94611	5.99155	5.9431	5.93488	6.20149	6.62783	5.98725	6.2135	6.1845	6.03283	6.09233	6.07704	5.86183	6.79796	5.78325
ACTR8	5.12143	5.10313	5.15956	5.26535	4.9019	5.13214	5.09175	5.11594	5.20139	5.14437	5.23845	5.19881	5.24405	5.0472	5.10987	5.2874	5.1131	5.02325	5.0819	5.18897	5.11937	5.15892	4.9475	5.4555	5.06417	4.9855	5.06225	5.0882	4.8485	5.0259	4.97725
ACTRT1	4.03722	3.86833	3.83438	3.85603	3.65762	3.9081	3.80198	3.93238	3.82452	3.63619	3.65272	3.76738	3.90614	3.63262	3.84135	3.74024	3.79222	3.93929	4.0524	3.78087	3.80397	4.002	3.6985	4.014	3.95125	3.82	3.74967	3.6235	3.885	3.741	3.922
ACTRT3	4.70804	4.51063	4.65702	4.50762	4.48579	4.49254	4.57786	4.49127	4.40238	4.66802	4.38853	4.56919	4.42286	4.43687	4.34937	4.60333	4.60762	4.34948	4.35542	4.29083	4.13087	4.4315	4.33	4.756	4.4315	4.5565	4.5715	4.633	4.28033	4.8595	4.308
ACVR1	6.12014	5.7869	5.81903	5.9183	5.98793	6.03917	5.83698	5.87131	5.98476	5.98377	5.90907	5.7806	5.66798	5.94015	5.84889	5.94468	5.93379	5.69315	6.04062	5.89802	5.8419	5.627	5.71967	6.0465	5.61083	5.96762	6.07125	5.9355	5.66088	6.2035	5.804
ACVR1B	4.19901	4.25968	4.47548	4.45579	4.17643	4.54901	4.6159	4.35061	4.42486	4.52925	4.51544	4.51952	4.35378	4.59404	4.6054	4.58008	4.55992	4.34948	4.33857	4.38905	4.48532	4.3915	4.902	4.73757	4.28967	5.0595	4.50158	4.3815	4.677	4.5804	4.5735
ACVR1C	3.7654	3.81671	3.9031	3.87131	3.55683	3.80024	3.89163	3.91048	3.81079	3.83056	3.85571	3.8055	3.95159	3.78651	3.93071	3.83365	3.78252	3.74016	3.80214	3.92438	3.78446	3.81333	3.875	3.956	4.40383	3.79408	4.23183	4.56752	3.91017	4.07617	3.86592
ACVR2A	4.77198	4.80413	4.96762	4.89195	4.69304	4.81396	4.70056	4.97913	4.6279	4.89095	4.7316	4.5794	4.74796	4.815	4.84024	4.90371	4.745	4.91643	4.83038	4.84466	4.69933	4.87375	4.67608	4.90017	4.9248	4.70483	4.9215	4.8485	4.55887	5.00497	5.00933
ACVR2B	5.12143	4.97779	5.08757	5.03452	5.24063	5.16252	5.11206	5.04024	5.01697	4.93303	5.0837	5.09246	5.15282	5.18197	5.01393	5.00569	5.09233	5.11405	5.0819	5.03048	4.96833	4.864	4.67608	4.756	4.8065	4.8725	4.8495	4.94779	4.755	5.3625	5.00933
ACVR2B-AS1	4.09696	4.13155	4.30967	4.36281	4.01563	4.18796	4.46516	3.99392	4.14897	4.0697	4.35933	3.98212	3.81643	4.21635	4.2502	4.03889	4.03175	4.01151	3.94095	4.07079	3.9395	4.07929	4.26	4.00267	3.941	4.48992	4.06583	3.931	4.02267	4.564	4.225
ACY1	7.48643	6.98452	6.76786	6.65742	6.76905	6.78968	6.78627	6.72552	6.59024	6.61599	6.77857	7.18111	6.91627	6.64183	6.66254	6.94302	6.79179	6.99452	6.83143	6.69333	6.76659	6.06583	6.245	6.28733	6.607	6.014	6.1807	6.54317	6.368	5.98683	6.4855
ACY3	3.83857	3.87865	3.66294	3.88881	3.63937	3.81607	3.81921	3.88931	3.88286	3.65452	3.80198	3.8327	3.7631	3.84279	3.81924	3.54536	3.63702	3.87206	3.68976	3.37714	3.93097	3.847	3.70683	3.753	3.656	3.6775	3.728	3.72	3.942	3.886	3.7675
ACYP1	6.88071	6.93474	7.05429	6.9169	7.05071	6.9219	7.0031	6.89548	6.91762	6.98325	6.94444	6.88115	6.90655	7.05512	6.92766	6.98452	7.0253	6.91119	6.87234	7.11456	7.04792	7.145	6.83333	6.4805	6.73842	7.14592	6.896	6.64725	6.90833	7.145	6.8175
ACYP2	6.55198	6.31202	5.87619	5.97254	6.14011	6.10496	6.04167	6.13905	6.22518	6.0704	6.30218	6.0659	6.20341	5.97254	5.96579	6.0823	5.95205	6.30282	6.22387	6.11524	6.00929	6.25933	6.08714	6.24867	6.454	6.1545	6.3386	6.35625	6.1165	6.16621	5.96592
ADA	8.15518	8.405	8.14087	7.9381	8.34222	7.67738	8.24302	8.19317	7.9219	7.9769	7.92651	8.09214	8.22333	7.80024	7.98869	7.88786	7.94976	8.40425	7.70381	7.92079	8.57333	7.09625	7.78883	6.34783	7.81262	7.2375	7.76325	7.87792	7.851	6.83292	8.14875
ADA2	9.93298	9.15548	9.00913	8.82101	9.30786	8.80571	9.27563	9.18214	8.74476	8.98058	9.225	9.69619	9.01099	8.5646	8.66556	9.76476	9.36119	9.1744	8.82006	9.29135	9.40738	6.69925	8.5135	6.632	8.421	6.906	7.63958	8.421	8.54608	6.69	7.717
ADAD1	3.96714	3.8056	3.7131	3.76143	3.78683	3.78443	3.97496	3.76829	3.78595	3.86529	3.74433	3.76738	3.64548	3.83325	3.87266	3.79447	3.9727	3.89	3.72181	3.78087	3.80397	3.8285	3.989	3.554	3.9725	4.0005	3.7395	3.6705	3.895	3.917	3.74967
ADAD2	4.73794	5.12227	4.95775	4.62816	4.95597	4.35262	5.01079	4.55978	4.66806	4.64869	4.77984	4.89238	4.99833	4.815	5.18131	4.60333	5.23952	5.31619	4.50216	4.46627	5.34423	4.5985	4.71477	4.50233	4.82533	4.70483	4.33	4.78575	4.74563	4.3195	4.8495
ADAL	4.61913	4.36206	4.43083	4.50762	4.61528	4.61563	4.46873	4.58329	4.48325	4.4932	4.4531	4.74458	4.15919	4.45528	4.38238	4.65317	4.52877	4.34278	4.47355	4.52738	4.56103	4.7365	4.564	4.8955	4.4055	4.5805	4.496	4.41783	4.45283	4.551	4.26983
ADAM10	6.32619	6.14905	6.26752	6.14603	6.14011	6.22881	6.29629	6.35343	6.19095	6.31853	6.17206	6.57008	6.25937	6.23664	6.17778	6.19095	6.14831	6.1186	6.2803	6.04327	6.11734	5.214	6.014	5.3902	5.687	5.3735	5.4984	5.676	5.95083	5.3335	6.1275
ADAM11	5.23071	3.96228	3.96552	3.94603	4.07146	3.84881	4.00688	4.03329	4.10425	3.89833	3.92661	3.98212	4.07817	3.92008	3.96286	3.88317	3.91548	3.97333	3.99729	3.99357	3.9875	4.172	3.989	4.07467	3.87683	4.08767	4.10367	4.056	3.99467	4.385	4.01351
ADAM12	4.55833	4.62908	4.47897	4.33913	4.57861	4.29665	4.48603	4.72226	4.53488	4.56226	4.40877	4.40968	4.39825	4.30778	4.51762	4.91349	4.50917	4.54381	4.71437	4.38544	4.44706	4.2155	4.30133	4.17817	4.20667	4.27508	4.19383	4.2145	4.20833	4.09567	4.30083
ADAM15	4.86397	5.49841	5.75696	5.82556	5.68287	6.23467	5.62708	5.87587	5.93566	6.10837	5.95755	6.0659	5.40536	6.07448	6.07425	6.28119	6.03659	5.37095	5.83173	6.00746	5.7869	5.51042	5.834	6.42475	6.06467	5.851	6.43367	6.2655	5.94	5.62375	6.43317
ADAM17	6.85214	6.44238	6.47671	6.35167	6.47398	6.50579	6.34841	6.51546	6.32817	6.38138	6.52469	6.37554	6.51841	6.43413	6.36583	6.59879	6.48952	6.51794	6.55881	6.28762	6.27367	6.00408	6.3163	5.969	6.12592	6.03283	6.052	6.12587	6.40417	5.715	6.285
ADAM18	3.61976	3.57429	3.71921	3.755	3.81643	3.53286	3.70214	3.76333	3.52905	3.55333	3.60726	3.69786	3.6277	3.73357	3.78619	3.72349	3.70976	3.51857	3.70119	3.62929	3.88976	4.029	3.7845	3.8735	3.712	3.7205	3.7345	3.83467	3.8265	3.74725	3.781
ADAM19	5.49615	5.93823	5.59643	5.64711	5.57532	5.40326	5.27998	5.53111	5.63187	5.55964	5.6069	5.29119	5.46175	5.38742	5.60562	5.49569	5.63403	5.75777	5.35782	5.47583	5.94646	5.83683	6.00662	6.011	5.525	6.6215	5.74417	5.59942	5.95752	5.75632	5.8985
ADAM1A	5.27004	5.46972	5.75696	5.44452	5.80608	5.48891	5.56482	5.56	5.39282	5.54131	5.68595	5.23167	5.235	5.69468	5.38082	5.43238	5.53643	5.50476	5.48367	5.68312	5.56119	5.58742	4.97587	5.5865	4.98982	5.01887	5.1445	5.25988	5.01267	5.46167	5.63792
ADAM2	3.88738	3.63921	3.73252	3.64357	3.72881	3.7569	3.58952	3.79052	3.59369	3.93929	3.65272	3.67008	3.78198	3.65746	3.72135	3.68714	3.51571	3.78694	3.78476	3.74833	3.46857	3.552	3.6985	3.907	3.812	3.6395	3.432	3.741	3.649	3.835	3.74967
ADAM20	3.95847	4.71437	4.7681	4.78825	4.40762	4.56833	4.87824	4.9127	4.68956	4.61675	4.57571	4.37401	5.029	5.08757	4.6054	4.25833	4.52877	4.50683	4.55302	4.46627	4.85297	5.203	4.95771	4.47233	4.184	4.89483	4.33	4.53225	5.1325	5.10283	4.95
ADAM20P1	4.37087	4.26889	4.36095	4.12935	4.48579	4.44724	4.1331	4.29905	4.28619	4.30921	4.15881	4.27198	4.33722	4.44421	4.34937	4.11071	4.32016	4.33913	4.28857	4.40854	4.46425	4.42093	4.25142	4.38633	4.13072	4.14	4.145	4.24692	4.184	4.35878	4.215
ADAM21	3.93929	3.8056	3.80397	4.06889	3.77556	3.56786	3.84845	3.81381	3.84283	3.75607	3.94865	3.81252	3.8073	3.93471	3.84135	3.90952	3.93024	3.98262	4.19893	3.97476	3.79413	3.82	3.9585	4.0455	3.823	3.96829	3.9025	3.771	3.709	3.97025	3.7675
ADAM21P1	3.64262	3.8056	3.69476	3.72683	3.85706	3.81607	4.01802	3.87817	3.82452	3.87535	3.7046	3.58845	3.69476	3.82212	3.94206	3.86833	3.84048	3.64881	3.64784	3.60111	3.82702	3.6615	3.754	3.91983	3.7085	3.87333	3.86177	3.771	3.942	3.679	3.728
ADAM22	4.14841	4.05504	4.40746	4.32048	3.96833	4.10683	4.00688	4.25571	4.08762	4.3594	4.08213	3.94881	4.05621	4.10405	4.2304	4.19658	4.04087	4.11071	3.94095	4.14532	4.07905	5.32	4.5045	4.90933	4.37046	5.1925	4.3	4.47125	4.4305	5.75632	4.62933
ADAM23	4.77696	4.29905	4.95775	5.15071	4.73667	4.78639	4.94375	4.78462	4.80371	4.69905	5.03349	4.73274	4.84845	4.97999	4.81857	4.38976	4.67544	4.24269	4.70392	4.8004	4.74383	4.15571	4.4785	4.538	4.8815	4.4725	4.52117	4.8175	4.40883	4.26	4.51967
ADAM28	6.14981	5.60994	6.22992	5.77583	6.23762	5.84361	6.2765	6.04619	5.75865	6.28811	6.33678	5.7806	5.89349	5.97254	6.24778	5.87809	6.09627	5.61219	6.12817	5.9154	6.31682	4.42093	6.255	4.29	5.53933	5.354	4.3915	5.8235	6.2425	4.88033	6.16225
ADAM29	3.58587	3.81135	3.71862	3.76143	3.79087	3.76243	3.6719	3.6519	3.73183	3.79565	3.73246	3.78262	3.70127	3.84956	3.77177	3.78738	3.72516	3.74841	3.72181	3.74313	4.03047	3.98383	3.74033	3.66442	3.8735	3.77333	3.63308	3.726	4.10067	3.7955	3.68333
ADAM30	3.87667	4.02095	3.88802	3.98163	3.95948	3.61905	3.74296	3.76829	3.86394	4.01151	3.7919	3.81252	3.96466	3.72893	3.67405	3.68714	3.87921	3.87206	3.74349	3.87262	3.80397	3.875	4.0105	3.7835	3.9725	3.97938	3.82217	3.85977	3.885	3.8755	3.835
ADAM32	4.13095	4.22238	4.19091	4.36984	4.24587	4.4027	4.28619	4.51161	4.22359	4.32473	4.43192	4.17722	4.45601	4.24413	4.12244	4.18667	4.08968	4.16659	4.33062	4.14071	3.99644	5.12221	4.5195	5.02517	4.4275	4.765	4.44233	4.44142	4.33067	5.122	4.62338
ADAM33	5.10773	4.79252	4.69224	4.90012	5.02587	4.61482	4.70786	4.73611	4.88421	4.66088	4.6573	4.72802	4.61627	4.65127	4.88119	4.71792	4.63208	4.90294	4.95794	4.60762	4.76927	5.686	5.354	5.5045	5.23083	5.89917	5.4275	5.13933	5.35414	5.427	5.14083
ADAM3A	3.88738	3.79478	3.68571	3.66278	3.82071	3.82762	3.77238	3.9554	3.82452	3.71883	3.89857	3.79077	3.7381	3.9434	3.7419	3.94143	3.59833	3.58095	3.84948	3.95641	3.67833	3.92125	3.931	3.87683	4.106	3.594	3.58	3.761	4.0455	3.85425	3.992
ADAM5	3.76405	3.86357	3.88242	3.7544	3.80821	3.73	3.86571	3.82857	3.7825	3.76159	3.86437	3.72169	3.7677	3.775	3.78155	3.75143	3.7344	3.77962	3.83143	3.755	3.81607	3.93625	3.8115	3.924	3.77958	3.77325	3.74425	3.82433	3.80225	3.922	3.895
ADAM6	3.37905	3.62833	3.84409	3.41929	3.74754	3.555	3.48095	3.52381	3.48167	3.47821	3.68667	3.63702	3.50262	3.63262	3.63254	3.67536	3.44683	3.4169	3.50595	3.76101	3.95738	3.67392	3.6865	3.564	3.542	3.594	3.6385	3.82917	3.4715	3.917	3.689
ADAM7	3.74754	3.74347	3.89873	3.80385	3.95024	3.84881	3.80198	4.01681	3.87317	3.80397	3.83071	3.73146	4.02214	4.01238	3.87266	3.99492	3.82071	3.9931	4.08403	3.78087	3.9231	4.021	4.0375	3.97267	4.1735	3.83933	3.91383	3.6595	3.99467	4.069	3.9645
ADAM8	10.3308	10.0794	9.66827	9.88786	10.2904	9.79449	10.2706	10.3786	9.98063	10.3413	10.1725	9.98063	10.4095	9.51292	10.0654	10.2959	10.4012	10.1255	10.1658	9.77093	10.168	6.59633	9.7065	6.2135	7.75725	7.19125	6.1807	7.74592	9.7795	6.607	10.1225
ADAM9	4.36095	4.50075	4.38825	4.1196	4.49567	4.23976	4.31952	4.09869	4.47494	4.26857	4.35016	4.45583	4.20696	4.38796	4.28929	4.4746	4.29905	4.21571	4.37659	4.44772	3.88714	3.8285	4.1831	4.442	4.115	3.96829	4.145	4.24692	4.1465	4.256	3.941
ADAMDEC1	6.53278	5.06871	6.21171	4.6045	6.15115	5.63615	6.26794	5.42284	5.82361	5.91615	6.27821	5.43333	5.06041	5.46738	5.58742	6.16746	6.0734	5.07137	4.52405	5.73294	6.1321	3.80983	4.64117	3.8245	4.7432	3.895	4.0265	4.98487	4.70679	3.782	5.00933
ADAMTS1	6.17004	6.46223	6.81976	6.84565	6.60254	6.63923	6.46968	6.30294	7.00087	6.45595	6.14071	5.94646	6.26645	6.94583	7.32456	5.73631	6.01984	6.44138	6.38179	6.47238	6.39762	7.91375	8.102	8.05686	7.595	8.891	8.303	7.6785	8.0935	8.3565	7.166
ADAMTS10	7.5655	7.8746	7.48516	7.6323	7.48476	7.38413	7.3144	7.40262	7.36194	7.07214	7.5575	6.98452	7.53357	7.67425	7.62905	6.69369	7.53226	7.87929	7.55294	7.43262	7.34563	8.1435	7.536	7.45258	7.623	8.051	7.82	7.44317	7.7255	8.275	8.01667
ADAMTS12	3.98929	4.04238	6.72927	3.81405	3.83905	3.87833	3.83849	3.87817	3.92552	3.81377	3.74433	3.60452	3.9854	3.99333	3.72135	3.87817	3.85071	3.87206	3.88918	3.84157	3.75706	3.95	3.90387	3.68955	3.76475	3.6575	3.85233	3.771	3.8645	3.917	4.11133
ADAMTS13	4.61913	4.85986	4.72226	4.96094	4.77257	4.89909	4.74512	4.93337	4.79294	4.74302	4.77427	4.65935	4.89048	4.57702	4.815	4.55992	4.85147	4.81723	4.91389	4.86019	4.75381	5.15892	4.90702	4.66862	4.95175	5.05325	4.96575	4.861	4.7685	4.77804	4.89075
ADAMTS14	7.06397	6.58548	5.97135	5.93698	5.57532	5.89349	5.54536	6.27233	5.3823	5.85879	5.94786	5.53583	5.48968	5.53915	5.6496	6.17912	6.16405	6.59714	5.92276	5.94516	5.74861	4.1945	5.22277	3.898	4.21383	4.16342	4.06583	4.2575	5.175	3.865	5.62737
ADAMTS15	3.94929	3.81671	3.97246	3.77	3.71119	3.59548	3.81921	3.92214	3.64152	3.92857	3.85984	3.8773	3.9371	3.925	3.85167	3.84849	3.68841	3.84095	3.80494	3.66452	3.69476	4.941	3.875	3.773	3.8735	4.195	3.8325	3.90798	3.85408	4.088	3.81695
ADAMTS16	3.70214	3.8576	3.66294	3.655	3.8881	3.85929	3.74296	3.84792	3.66194	3.83357	3.5802	3.57643	3.88548	3.79087	3.64048	3.54536	3.74103	3.87206	3.83857	3.79069	3.70286	3.82	3.70683	3.8465	3.656	3.96829	3.72	3.581	3.915	3.9795	4.25475
ADAMTS17	4.40881	4.31905	4.46923	4.2591	4.27155	4.32881	4.27976	4.17202	4.08762	4.51452	4.38853	4.11942	4.18749	4.4081	4.32877	4.14405	4.22345	4.36291	4.44143	4.27675	4.2877	4.3765	4.2155	4.30892	4.0335	4.158	4.072	4.27417	4.18075	4.3425	4.26
ADAMTS18	4.48353	4.88653	3.99262	4.31024	3.81286	4.08683	4.78979	3.85825	3.78595	4.50922	3.94865	4.62925	3.89558	4.20686	4.2794	4.02929	4.16968	4.83361	3.70119	3.84157	3.98262	4.1285	3.822	4.3205	4.0655	3.87333	3.98438	4.107	4.0355	4.01933	4.7615
ADAMTS19	4.35071	4.28619	4.29071	4.33119	4.40762	4.18796	4.31952	4.25571	4.33325	4.77131	4.35933	4.45583	4.37214	4.18079	4.32877	4.55992	4.33968	4.47563	4.53373	4.39976	4.26008	4.472	4.5755	4.95	4.85158	4.5015	4.7025	4.98487	4.6395	4.94125	4.2775
ADAMTS2	4.12833	3.9244	3.89873	4.06524	4.17278	4.37786	4.00688	3.96488	4.06332	4.10857	4.03063	3.98921	4.07817	4.37143	4.10405	4.04516	4.19383	4.06762	4.21881	4.07079	4.07905	4.0845	4.2455	4.24629	4.39117	4.483	4.5545	4.51642	4.24812	4.069	4.235
ADAMTS20	3.61571	3.82254	3.76302	3.66028	3.65405	3.74373	3.78365	3.81976	3.6719	3.68667	3.83532	3.69786	3.59833	3.74	3.65262	3.6719	3.67952	3.80857	3.70119	3.74347	3.74643	3.5565	3.6985	3.83133	3.672	3.726	3.7395	3.6005	3.56	3.6305	3.689
ADAMTS3	4.37087	4.68438	4.74595	4.66913	4.81333	4.33099	4.81268	4.39877	4.54797	4.46881	4.64202	4.06873	4.37214	4.815	4.73803	4.18667	4.33968	4.61683	4.49135	4.3402	4.30817	4.117	4.61107	5.48483	4.38083	4.26833	4.6215	4.70408	4.50229	4.5985	4.7287
ADAMTS4	5.48654	6.28218	5.5501	5.70865	5.10357	5.6881	5.3823	5.54611	5.45099	5.69423	5.13587	5.31325	5.24759	5.07865	5.45304	5.38143	5.66016	6.22119	5.5254	5.10393	5.73476	5.58742	7.18025	6.01617	5.74865	7.656	5.99142	5.656	7.15475	7.4545	6.62667
ADAMTS5	4.84258	6.49897	5.92131	5.61111	5.0554	4.99758	5.00141	4.90151	5.22052	5.74849	4.68294	5.10234	4.73794	5.45667	5.7166	5.13371	6.17397	6.52853	4.69819	5.33179	5.27381	5.73473	5.79563	7.1995	6.1947	4.797	6.68	6.24592	5.81358	4.73775	6.53283
ADAMTS6	4.24198	4.33992	4.33617	4.20214	4.07734	4.26645	4.07762	4.18774	4.11425	4.46881	4.1494	3.94317	4.07817	4.26028	4.32877	4.2748	4.13365	4.12905	4.30929	4.288	4.09976	4.44367	4.34812	5.322	4.33	4.48992	5.02437	4.23192	4.33067	4.8835	4.68575
ADAMTS7	6.33183	6.79563	6.68778	6.76575	6.61246	6.69024	6.57667	6.51933	6.61143	6.54262	6.56794	6.92655	6.63984	6.67738	6.58567	6.64107	6.70925	6.66833	6.56929	6.57048	6.58929	6.60243	6.75917	6.76583	6.7055	6.72917	6.717	6.62533	6.74033	6.61383	6.61317
ADAMTS7P1	5.14582	5.31985	5.17459	5.07956	5.14127	5.14698	5.02563	5.08716	5.04603	4.72763	4.9857	5.24837	5.19306	5.05815	4.93	5.13089	5.16825	5.23556	5.30071	5.16095	5.02587	4.80667	5.23337	5.34733	5.2005	5.16892	5.25517	5.09567	5.143	4.81204	5.06455
ADAMTS8	5.24111	7.5196	7.38897	7.05865	7.1354	5.36754	7.28012	5.92472	6.76353	6.26905	7.12214	6.42327	6.5973	6.72262	7.50758	5.89816	6.00377	7.58683	6.67476	6.75585	6.43095	6.97863	8.004	8.1815	6.5751	8.42025	7.093	6.4425	8.06292	8.102	7.1175
ADAMTS9	6.13067	7.55002	6.20012	6.43246	6.10238	5.96405	6.07623	6.11131	6.16754	6.56222	6.04879	5.95991	5.48143	6.43413	6.77857	5.76134	6.51187	7.57405	6.15676	6.38627	6.36468	7.68417	8.0475	8.05686	7.20983	8.18717	7.16737	7.2255	8.06292	8.6545	7.85283
ADAMTS9-AS1	3.58988	3.78381	3.81405	3.69476	3.91363	3.9081	3.69048	3.6519	3.74613	3.91786	3.61167	3.69254	3.72077	3.82212	3.58774	3.82748	3.8031	3.68952	3.82714	3.70929	3.69476	3.771	3.70683	3.8245	3.812	3.628	3.709	3.8685	3.38	3.865	3.86592
ADAMTSL1	4.33976	4.45048	4.61897	4.645	4.26667	4.36206	4.39794	4.49675	4.46149	4.51565	4.34198	4.49202	4.57056	4.45012	4.53202	4.38976	4.48317	4.4523	4.37659	4.33734	4.41306	5.043	4.60767	4.95	4.76875	5.24283	4.86717	4.60967	4.50017	4.97957	4.91767
ADAMTSL2	5.30575	5.44581	5.19286	5.46738	4.82952	5.62183	4.90254	5.54405	4.97229	5.53413	5.06226	4.69938	5.36242	5.94897	5.72025	5.3224	5.94268	5.49952	5.29444	5.2894	4.94952	5.24133	5.01114	4.66017	5.09917	5.3865	5.272	4.98922	5.165	5.18283	5.34317
ADAMTSL3	5.03869	4.87079	5.42984	5.62702	5.42988	5.69726	5.37889	5.12278	5.51151	5.27651	5.14151	4.37401	4.51161	5.53151	5.44306	4.51627	5.10202	4.85762	5.44071	5.36984	5.04024	6.27617	5.83887	6.2655	5.98767	6.393	6.4925	6.27617	5.76142	6.32875	5.48775
ADAMTSL4	6.52847	6.11516	5.86373	5.76998	5.82437	5.89349	5.55141	5.82915	5.68153	5.81952	5.78167	6.07524	5.87256	5.85087	5.72849	5.94062	5.82166	6.13048	6.25615	5.86552	5.73698	6.392	6.063	5.97404	5.78753	6.05925	6.21567	5.87267	6.037	5.184	5.83753
ADAMTSL4-AS1	4.42472	4.16095	4.58599	4.3871	4.03548	4.44724	4.30929	4.26667	4.19929	4.37	4.29905	4.48825	4.37214	4.36942	4.4073	4.39976	3.9619	4.25208	4.40746	4.20169	4.33976	4.556	4.61107	4.4935	4.5195	4.62988	4.9759	4.53225	4.58933	4.95	4.684
ADAMTSL5	6.86187	6.58548	6.27821	6.58714	6.74905	6.44226	6.64679	6.73996	6.70393	6.32515	6.895	6.88849	6.5973	6.34806	6.54976	6.84071	6.62726	6.82548	6.8371	6.75585	6.73482	7.5195	6.9515	6.92717	7.0615	6.9245	6.96	6.59583	6.91367	6.65967	6.5479
ADAP1	6.93524	6.52214	6.32653	6.04333	6.26808	6.28385	6.2765	6.44037	6.155	6.13077	6.33678	6.75179	6.15754	6.04611	6.09517	6.54201	6.38905	6.43119	6.3204	6.33341	6.39393	5.37425	5.92133	4.54454	5.7635	5.3735	5.5225	5.706	5.9785	5.3525	5.6855
ADAP2	9.68524	9.31452	8.1106	9.28119	9.24607	9.01482	9.4419	9.47286	9.05	9.32588	9.23417	9.46762	9.65802	9.32588	8.95772	9.39619	9.39696	9.59524	9.28325	9.3306	9.14262	7.68417	7.4145	6.89375	8.612	6.393	7.83	8.2815	7.71742	5.589	8.4625
ADAR	8.82448	8.74881	8.82489	8.71841	8.63921	8.77563	8.54561	8.68738	8.70119	8.61993	8.79411	8.75714	8.74703	8.72179	8.85381	8.69419	8.70363	8.76484	8.53238	8.8604	8.73524	8.4405	8.433	8.54133	8.363	8.545	8.4625	8.48367	8.29617	8.337	8.56338
ADARB1	6.13571	6.13222	6.47671	6.59429	5.98738	6.43119	6.16702	6.37619	6.382	6.46923	6.2463	5.80496	6.48183	6.47762	6.53427	6.09314	6.31576	6.16762	6.47675	6.29107	6.31065	6.8675	6.6215	7.0125	6.7965	7.213	7.123	6.7335	6.50958	7.03392	6.52
ADARB2	4.04718	4.04974	4.81268	4.12159	4.2227	4.07127	4.38579	3.98183	4.01885	3.9948	4.24994	4.17177	4.00984	4.26849	4.45587	4.02429	4.54317	4.11071	3.96833	4.49093	3.97873	4.16267	4.04467	4.119	4.07933	4.15712	4.11067	4.078	3.9315	4.03433	4.1575
ADARB2-AS1	3.76056	3.77357	3.76302	3.85603	3.92317	3.7569	3.69048	3.70368	3.90254	3.7831	3.93891	3.63702	3.71119	3.93471	3.61071	3.81631	3.75103	3.72278	3.92143	3.74833	4.33976	3.72233	3.773	3.773	3.72658	3.895	3.709	3.82917	3.659	3.792	3.86592
ADAT1	5.5071	5.38198	5.57359	5.30968	5.4031	5.53667	5.4121	5.50849	5.42611	5.50486	5.43238	5.61597	5.25357	5.32516	5.39173	5.62881	5.75659	5.50476	5.45655	5.81667	5.53349	5.0365	5.0025	5.614	5.10267	4.9664	5.10213	5.25988	4.976	5.22392	5.36542
ADAT2	4.20952	4.56488	4.42532	4.37544	4.36774	4.35262	4.5346	4.62794	4.47494	4.41222	4.53476	4.52837	4.44421	4.48486	4.49143	4.51183	4.62762	4.47563	4.38806	4.50357	4.26008	4.56629	4.20937	4.695	4.37046	4.547	4.372	4.524	4.3595	4.92075	4.461
ADAT3	7.15952	7.18524	6.75909	6.73	6.96774	6.7329	7.0031	7.08913	6.91762	7.0604	6.82786	7.43452	7.05833	6.87864	6.84996	7.05677	6.9219	7.2294	6.76048	6.88591	7.19571	6.28733	6.80325	6.576	6.78267	6.3	6.717	6.56642	6.8695	6.369	6.718
ADCK1	5.05321	4.55438	4.64643	4.68929	4.85954	4.73179	4.69147	4.74087	4.60944	4.6269	4.67389	4.91198	4.56698	4.86189	4.46048	4.92163	4.80361	4.45595	4.53373	4.76439	4.56103	4.002	4.5045	4.173	4.41979	4.40491	4.3915	4.23583	4.33067	4.369	4.58037
ADCK2	5.31648	4.63877	5.35143	5.12083	5.35667	5.46897	5.51839	5.28829	5.17202	5.34468	5.6569	5.74998	5.029	5.30361	5.14127	5.50825	5.60806	4.52563	5.49504	5.50817	5.10667	4.4015	4.70617	4.83119	4.6975	4.62988	4.95478	5.0255	4.69887	4.55558	4.95
ADCK5	6.23786	6.31849	6.035	5.93698	6.17901	6.02262	6.02502	6.06754	5.99726	6.10837	6.01651	6.17934	6.1052	6.0556	6.09517	6.10516	6.15491	6.23782	5.88944	6.03667	6.21135	5.69733	5.74675	5.46413	5.804	5.7225	5.70517	5.6955	5.79443	5.65483	5.99142
ADCY1	4.50357	4.58468	4.42532	4.89195	4.70056	4.80202	4.435	4.42262	4.17944	4.84681	4.30933	4.11942	4.73794	4.99337	4.98813	4.12052	4.83722	4.52563	4.46713	4.60762	4.13087	4.412	4.20167	4.27875	4.6975	4.547	4.7135	4.7245	4.155	4.369	4.93867
ADCY10	3.82859	3.87865	3.85548	3.56952	3.72	3.82762	3.97496	3.83635	3.72685	4.33992	4.20746	3.73146	3.79016	3.90614	3.89381	3.74024	3.81214	3.76452	4.09524	3.78087	4.08968	3.711	3.6615	3.671	3.843	3.7785	3.86177	3.6705	3.85408	4.0785	3.88633
ADCY10P1	4.8027	4.89776	3.73252	4.47655	4.74246	4.70623	5.04107	4.74087	4.41262	4.64869	4.61214	4.7225	4.68226	4.83585	4.72111	4.52278	4.78274	4.67171	4.11738	4.58889	5.00151	4.5985	4.85807	3.951	4.6475	4.4335	4.098	4.48983	4.8975	4.95	4.66917
ADCY2	3.73421	3.83351	3.75937	3.88556	3.83905	3.89506	3.84397	3.8969	3.69683	3.74643	3.81643	3.91786	3.84083	4.05065	3.72754	3.89579	3.86562	3.89	3.60071	3.86762	3.7069	3.63342	3.79883	3.8195	3.672	3.7485	3.92958	3.88713	3.6445	3.8925	3.7445
ADCY3	7.92036	8.22841	8.35321	8.06897	8.21143	8.37799	8.29952	8.46829	8.58119	8.10139	8.3501	8.88437	8.335	8.38774	8.18278	8.66383	8.42287	8.13286	8.02349	8.28357	8.20024	7.98717	8.04042	8.4675	8.92808	8.11475	8.705	8.8448	8.011	8.0665	8.54004
ADCY4	5.81429	6.74748	6.20637	6.37313	5.8819	6.20018	5.90246	6.09881	5.88452	6.38525	5.84381	6.03278	6.03754	6.28317	6.47095	5.89369	6.127	6.65738	5.84984	5.92925	6.40389	6.95233	6.245	5.73757	6.43975	6.23842	6.333	6.502	6.2245	6.44883	6.71288
ADCY6	5.25079	5.43212	4.38825	6.02508	5.96204	5.68381	6.04619	5.56	6.12558	5.54131	5.90907	5.36285	5.85389	6.26845	6.39663	5.48157	5.58758	5.53522	6.05802	6.05989	5.50722	5.98953	5.8235	6.28733	6.144	6.6445	6.3842	6.27617	6.0815	6.0735	6.322
ADCY7	6.92538	6.65571	6.73933	6.46603	6.81516	6.60532	6.58643	6.73996	6.51813	6.65871	6.69921	6.78317	6.7325	6.55603	6.41786	6.79159	6.68082	6.71641	6.63518	6.74655	6.91341	5.33133	5.6125	5.04213	5.8915	5.1445	5.48483	5.9585	5.694	4.73775	5.882
ADCY8	3.63	3.62833	3.84409	3.48476	3.93123	3.7569	3.83849	3.99392	3.83369	3.81377	3.67224	3.71563	3.85476	3.82212	3.9931	4.00802	3.78252	3.85075	3.93159	3.74012	3.68738	3.789	3.725	3.773	3.669	3.83017	3.942	3.72	3.837	3.649	3.95175
ADCY9	6.38468	6.36433	6.60942	6.73	6.90048	6.91143	6.41781	6.43032	6.74198	6.24833	6.52469	6.12298	6.43833	6.72262	6.95929	6.30187	6.51187	6.44138	6.72101	6.88591	6.24516	7.145	7.07475	7.4395	7.0315	7.734	7.48933	7.189	7.07725	7.798	6.8405
ADCYAP1	4.96599	5.10313	3.69476	4.68929	4.63445	4.37228	4.07762	4.43429	4.06833	4.66802	3.92974	4.37401	4.53024	5.01667	4.76833	4.21809	4.29905	5.14549	3.82714	4.30161	4.22238	4.10833	5.557	3.804	4.225	4.778	3.699	4.279	5.638	4.138	4.66917
ADCYAP1R1	4.19901	4.16095	4.17127	4.08905	4.06325	3.99206	4.05746	4.13016	4.15911	3.99214	4.10119	3.99325	4.0031	4.04702	4.18825	4.19658	4.17893	4.21571	4.32786	4.14532	3.36667	3.95	4.1015	4.024	4.19417	4.2055	4.17275	3.99117	4.21525	4.3895	4.1305
ADD1	5.29679	5.63992	6.05286	6.00492	5.4031	5.9323	5.8169	5.82397	5.96913	5.95286	5.73278	5.50619	5.89349	5.95456	5.84889	5.49091	5.74724	5.63881	5.99818	5.60675	6.00929	6.3595	6.05067	6.1655	5.93433	6.27065	5.959	6.0165	5.989	5.853	5.81442
ADD2	3.98929	3.95671	4.20327	3.81405	3.90873	4.13056	4.02841	3.83635	3.9304	3.96393	4.06738	4.00397	4.05621	4.01657	3.96825	4.00143	3.88905	3.94302	3.93159	3.96111	4.03047	3.85767	3.99367	3.76914	3.88967	3.78917	3.77413	3.9455	3.87733	3.82	3.84833
ADD3	7.38524	7.19389	7.28944	7.47532	7.45667	7.36524	7.29119	7.32929	7.27446	7.55782	7.37075	7.10468	6.95524	7.4781	7.21056	7.1823	7.23944	7.09726	7.17857	7.41032	7.34563	8.3155	7.34975	7.7875	8.0225	7.82	8.213	8.18	7.29	8.3115	7.80675
ADD3-AS1	4.18917	4.12897	4.12651	4.22649	4.10266	4.21034	4.13982	4.23421	4.18651	4.15795	4.1445	4.05262	4.093	4.51448	4.11282	4.10735	4.12678	4.07694	4.32048	4.14532	4.12513	5.00183	4.2655	4.804	4.27455	4.505	4.43417	4.407	4.22008	4.56867	4.38417
ADGB	3.71048	3.71833	3.79262	3.91458	3.74754	3.76667	4.00688	3.8546	3.87317	3.72825	3.86913	4.04095	3.7381	3.9406	3.87266	3.8892	3.9619	3.84095	3.84611	3.83712	3.63393	3.9785	3.8275	3.83133	3.8845	3.7625	3.7975	3.89735	3.7695	3.7975	3.941
ADGRA1	3.91786	3.78381	3.93119	3.43095	3.82071	3.86889	3.97496	3.83635	4.12952	4.0019	3.99214	3.76738	3.78198	3.95413	3.81924	3.80488	3.87921	3.91024	3.86833	3.99357	3.88714	4.088	3.90387	3.866	4.002	4.03567	3.8435	3.8012	4.012	3.907	3.835
ADGRA2	6.14981	6.89611	6.84266	7.01683	6.5879	7.23143	6.61452	6.90381	6.87992	7.08262	6.71327	6.58282	6.79357	7.26143	7.06599	6.43413	7.26143	6.97476	6.9123	6.86972	6.85958	6.84333	6.87267	6.03825	7.14433	7.38583	7.155	7.16575	6.6545	6.89775	7.42333
ADGRA3	4.74222	5.335	5.33524	5.39881	5.35143	5.20376	5.24402	5.24563	5.42163	5.19857	5.25298	4.85214	5.27302	5.40119	5.49897	4.84599	4.96474	5.14999	5.36154	5.23575	5.14242	6.469	5.74354	6.3268	5.57275	6.61608	6.0411	5.71892	5.6975	6.83692	5.705
ADGRB1	5.20127	5.10313	5.30246	5.11081	5.51758	5.6455	5.40214	5.29786	5.30214	5.6398	5.60238	5.37099	5.3904	5.12679	5.4031	5.3224	5.28008	5.01225	5.35782	5.24667	5.39222	5.6545	5.203	5.165	5.2675	5.685	4.96575	5.297	5.15396	5.853	5.507
ADGRB2	4.71214	4.7029	4.87774	4.78825	4.57881	4.62312	4.70056	4.6755	4.86029	4.76176	4.82718	4.71077	4.64847	4.76657	4.56929	4.56937	4.61746	4.63607	4.93643	4.6604	4.77008	5.17483	4.752	4.97867	4.849	5.3295	4.861	4.7615	4.817	4.976	4.73967
ADGRB3	4.38091	5.32876	5.08028	5.50266	5.77552	4.75216	4.75401	4.92329	4.95882	4.93303	5.18183	4.74458	4.80539	5.81413	5.35369	4.30933	4.68579	5.18009	4.85986	5.765	4.44061	5.7545	4.92117	5.86425	5.32644	4.94983	5.6855	5.45425	4.7648	6.19879	5.74417
ADGRD1	4.21571	4.10833	4.30468	4.11508	4.17278	4.29841	3.91714	4.21756	3.90905	4.40746	4.26508	4.26365	4.0031	4.11857	4.14308	3.97532	3.93959	4.10597	4.28048	4.20859	4.14984	4.31933	4.40267	4.58967	4.5195	4.5565	4.54075	4.63883	4.50983	4.3635	4.4035
ADGRD2	4.39008	4.29591	4.19091	4.2373	4.23563	4.04744	4.19556	4.25571	4.39467	4.1954	4.26016	4.37401	4.09905	4.18865	4.18825	4.48317	4.19786	4.37623	4.40746	4.15401	4.29389	4.99183	4.1831	4.523	4.1735	4.33	4.24675	4.33658	4.389	4.18525	4.121
ADGRE1	5.01395	4.84352	4.99964	4.84079	4.74246	4.69389	5.17357	4.99942	4.78452	4.79109	4.88147	5.06342	4.68226	4.64694	4.73803	5.09865	4.54909	4.99917	4.86968	4.94087	5.23873	5.01133	4.5045	4.61817	4.8065	4.6065	4.5715	4.714	4.56867	4.4935	4.37542
ADGRE2	7.06397	7.38056	7.4025	6.78171	7.10857	6.99472	7.07091	6.89548	7.19147	7.1331	7.48444	7.19845	7.03333	7.21119	7.08048	7.26095	7.16976	7.32579	7.0081	6.92503	7.39476	4.53167	6.3163	5.354	5.733	4.65325	4.9095	5.76715	6.29567	4.684	6.72917
ADGRE3	3.77	4.74202	4.11071	4.15873	3.92317	4.18796	3.87575	4.0381	4.0231	4.54905	3.77298	4.04722	3.9275	4.10405	4.01254	4.04889	3.93959	4.64427	3.87825	3.93857	4.64107	4.002	4.52383	3.76275	3.9725	3.81067	3.88117	3.931	4.3415	4.03883	3.931
ADGRE4P	4.04103	4.04913	4.33617	3.81405	4.37171	4.00522	4.15722	3.96024	4.24214	3.92333	4.00262	3.99958	3.94603	4.16683	3.88317	4.23768	4.29347	4.04065	4.11738	3.94143	4.21034	3.72808	3.88867	3.8	3.87817	3.901	3.728	3.85977	3.7695	3.581	3.771
ADGRE5	9.31865	9.14262	9.1498	9.04583	9.24607	8.98187	9.1881	8.91012	9.09702	9.02881	9.1369	8.83738	9.0219	9.24951	9.20494	8.86413	8.85214	9.08268	9.05948	8.97829	9.1498	9.09925	9.30443	9.75667	9.06275	9.91088	9.46825	9.1825	9.24537	9.84425	9.111
ADGRF1	3.82516	3.74347	3.80805	3.97024	3.82556	3.64024	3.75665	3.91786	3.84283	3.81877	3.7381	4.06873	3.7677	3.74992	3.76312	3.66452	3.78748	3.77238	3.72881	3.8773	3.74643	3.73724	3.7495	3.6995	3.85503	3.8915	3.786	3.85977	3.8016	3.9645	3.689
ADGRF2	3.6581	3.73238	3.77339	3.74762	3.91363	3.48238	3.57262	4.0381	3.67952	3.65452	3.73246	3.67008	3.87619	3.58667	3.76312	3.71952	3.81214	3.63643	3.73218	3.84157	3.7648	3.761	3.6155	3.484	4.0875	3.81067	3.699	3.729	3.895	3.792	3.86592
ADGRF3	3.8681	3.81671	3.89873	3.90993	3.83905	3.89833	3.71151	3.88931	3.81405	4.0019	4.03063	3.72516	3.74571	3.70963	3.81924	4.07929	3.88905	3.91024	3.91024	3.92857	3.9395	4.117	3.89375	3.7205	3.678	3.8515	3.9025	3.82917	3.8745	4.05954	3.6495
ADGRF4	3.8681	3.82776	3.69476	3.82381	3.83905	3.83857	4.0381	3.93238	3.795	4.05929	3.93891	3.88857	3.89558	4.0773	3.84135	3.78365	3.93959	3.76452	3.89952	3.92857	4.14167	3.931	3.854	3.753	3.794	4.0005	3.74967	3.72	3.9315	4.0785	3.835
ADGRF5	4.9164	6.02761	5.42984	5.76998	5.32058	6.02902	5.45282	6.24238	5.50337	5.7575	5.05531	4.96651	6.15384	5.76887	5.86702	5.38143	5.92552	5.95145	5.14817	5.3554	5.47619	4.79267	5.49704	4.48783	5.09967	4.91492	4.94475	5.16967	5.45367	5.04667	5.93167
ADGRG1	6.67405	7.91107	7.28944	7.58167	6.47398	7.4353	6.62476	7.40262	7.32655	7.44845	6.61933	6.80329	6.83635	7.25048	7.68155	6.76127	7.23944	8.01802	6.67476	6.82278	7.66524	7.26621	8.095	7.074	7.96332	8.059	7.93608	7.9155	7.9785	8.0563	8.11754
ADGRG2	4.00845	3.9573	3.9769	3.87008	4.01143	4.34214	3.95056	3.99392	4.01405	3.91786	4.1331	3.88857	3.80405	4.02117	3.95791	4.00802	4.00823	3.98857	4.13901	3.83712	4.07905	4.7432	4.84588	5.69822	4.9248	4.72042	5.33533	5.254	4.76075	4.7235	4.11683
ADGRG3	4.04718	4.2304	4.11071	4.27921	4.08079	3.99206	4.09773	4.33976	4.21857	4.25845	3.89857	3.843	4.24437	4.19758	4.18825	4.07929	4.16968	4.34948	4.20869	4.01286	4.08968	3.99283	4.4	4.024	4.21383	3.941	4.1365	3.90798	4.311	4.0785	3.992
ADGRG4	3.77875	3.79478	3.88802	3.80385	3.66647	3.7569	3.95611	3.84792	3.78595	3.96008	3.76258	3.71563	3.84611	3.83325	3.76312	3.71952	3.84048	3.77452	3.79505	3.95641	3.78246	4.021	3.822	3.866	4.0655	4.291	3.82217	3.82033	3.915	4.411	3.7585
ADGRG5	3.71048	3.98167	3.957	4.03059	3.87741	3.78443	3.86571	3.98254	3.94063	4.08087	3.99214	3.95345	4.06762	3.90984	4.08244	4.02308	3.96663	4.0981	4.04238	4.14992	3.9231	3.82	3.9135	3.773	3.8735	3.805	3.8325	3.9554	3.9795	3.77233	3.895
ADGRG6	5.19151	4.71437	4.56575	4.61603	4.69304	4.80202	4.58696	4.83762	4.65786	4.4996	4.74103	4.83385	4.71437	4.82546	4.62488	4.59137	4.75369	4.87282	4.59396	4.90167	4.56885	4.72533	4.351	4.35333	4.84108	4.42483	4.8495	5.20934	4.25367	4.9855	4.6395
ADGRG7	3.67905	3.45286	3.76302	3.64357	3.62024	3.88841	3.76143	3.64246	3.6719	3.72825	3.74433	3.98212	3.7381	3.69734	3.69845	3.59952	3.66119	3.75359	3.63579	3.88155	3.77381	3.82	3.5485	3.773	3.823	3.556	3.8125	3.82917	3.728	3.792	3.845
ADGRL1	5.43192	5.2623	5.05898	5.08789	4.97719	5.06676	4.89048	4.96818	4.98786	4.77131	5.06226	4.85214	4.76673	4.86189	4.70159	4.6377	4.84536	5.15571	4.88048	4.88229	5.21694	6.23575	4.92942	5.1565	4.8325	5.2192	5.03467	5.06963	4.99333	5.236	5.11621
ADGRL2	4.87671	5.74484	5.71746	5.83897	5.40603	5.5131	5.45282	5.43589	5.60681	5.4848	5.3954	5.18397	5.32365	5.70603	5.77718	5.20094	5.46436	5.71373	5.42284	5.60254	5.72579	6.14683	5.78517	6.00183	5.84025	6.1603	6.08675	5.89667	5.9045	6.35283	5.99608
ADGRL3	4.08968	4.29	4.21667	4.44397	4.50067	4.46256	4.51635	4.05202	4.27976	4.14119	4.38388	4.04175	4.35048	4.47952	4.8451	4.13861	4.56853	4.14992	4.36512	4.92111	4.08449	4.8495	4.4115	4.9855	4.778	5.443	4.9095	4.87067	4.4425	5.05033	4.71817
ADGRL4	5.25611	6.35918	5.61655	5.78881	5.48575	5.43357	5.57552	5.86433	5.56861	5.76387	5.28333	5.4231	5.35317	5.79641	5.90546	5.25228	5.86357	6.29	5.00607	5.27988	5.69381	6.0215	5.94658	5.316	6.106	5.805	5.7795	6.1895	5.9955	6.4525	6.59317
ADGRV1	3.82859	4.05504	3.90952	3.86712	3.87741	3.93992	3.94563	3.68612	3.76667	3.86529	4.01143	3.99325	3.64548	4.01238	4.00242	3.84849	3.6719	3.9298	3.83857	3.965	3.86976	4.15571	3.8115	3.68955	3.794	3.81067	3.7395	3.85029	3.728	3.711	3.982
ADH1A	5.88559	6.6177	7.33667	7.60306	6.99647	7.3227	6.93405	6.93678	7.34992	6.73028	7.50198	6.73607	6.66529	7.03595	7.68155	6.35964	7.12048	6.75585	6.35734	7.67956	6.54846	7.5455	7.482	7.8165	8.1425	8.051	8.386	8.11475	7.40833	7.51375	7.296
ADH1B	4.86397	5.59841	6.10524	6.33119	5.86048	6.02262	5.8169	5.46063	6.095	5.39437	6.1771	5.18979	5.36242	5.73892	6.31817	5.15115	5.82571	5.65984	5.39143	6.28762	5.28401	6.63883	6.06992	6.702	6.8705	6.50988	6.93017	6.889	6.00933	6.349	5.82371
ADH1C	6.84119	8.08659	8.97238	9.22375	8.47968	8.7944	8.41698	8.48579	8.76825	8.16099	8.9277	7.96756	8.3219	8.63921	9.22024	7.69321	8.69194	8.29671	7.88881	9.02795	8.05397	9.42682	8.989	9.289	9.515	9.61767	9.93275	9.625	8.931	9.20575	8.89425
ADH4	4.15817	4.05504	3.97246	3.95956	4.46476	3.97171	3.67857	4.08865	4.00368	4.0697	3.98036	3.843	3.79016	3.9831	3.87266	3.78365	3.79222	4.31952	4.27749	4.08044	4.1881	4.1655	4.35983	4.47233	5.4365	3.8845	4.31042	5.656	4.32092	4.38025	4.2775
ADH5	6.0469	6.05024	6.41865	6.94619	6.92131	6.41438	6.51917	6.2281	6.62171	6.14081	6.57905	6.01994	5.86626	6.35226	6.68365	6.34972	6.29143	6.05901	6.46119	6.75585	6.26602	7.72958	6.74175	7.78	7.20017	7.10958	7.431	7.306	6.75883	7.77083	6.7716
ADH6	3.76452	3.63333	3.84986	3.81405	3.82556	3.71413	3.86976	3.70368	3.74613	3.81377	3.86913	3.65167	3.8073	3.81214	3.68452	3.72349	3.70397	3.88127	3.71119	3.58905	3.74595	3.6395	3.8275	3.89375	3.609	3.6985	3.8079	3.729	3.652	3.6385	3.69447
ADH7	3.76056	3.75952	3.77339	3.60222	3.90627	3.67722	3.80198	3.77349	3.75151	3.72825	3.75671	3.76738	3.79919	3.79563	3.68403	3.69341	3.70976	3.75359	3.75802	3.61611	3.6719	3.688	3.7405	3.773	3.71317	3.823	3.72283	3.6685	3.6255	3.7315	3.7675
ADHFE1	4.94952	4.79687	5.41921	5.09865	5.27381	5.15881	5.25481	5.07119	5.13548	5.06515	5.27889	4.99651	5.13417	5.17663	5.275	5.00964	5.35032	4.86905	5.4756	5.3551	5.00151	6.429	5.40845	5.62718	5.81004	6.00883	5.97073	5.866	5.4865	6.58158	5.38
ADI1	7.22253	7.00381	6.92095	7.04333	7.04529	7.05214	7.0619	6.98702	7.08583	6.93833	6.9995	7.02444	7.00357	6.98008	6.89841	7.01018	7.00595	6.98024	7.21675	7.14893	6.75774	7.6105	7	7.585	7.47517	7.372	7.778	7.498	6.98504	8	6.93667
ADIG	3.77	3.65	3.74806	3.82918	3.84483	3.66294	3.72778	3.50667	3.75151	3.88714	3.91417	3.83952	3.64048	3.74433	3.7151	3.68714	3.67524	3.67786	3.60119	3.72389	3.79124	3.6045	3.587	3.587	3.7395	3.7735	3.694	3.604	3.6445	3.6765	3.699
ADIPOQ	3.82859	3.72278	3.81405	3.79238	3.82071	3.7569	3.82802	3.82405	3.795	3.7731	3.76258	3.76738	3.83542	3.80214	3.78619	3.76238	3.7727	3.75359	3.79505	3.72968	3.84857	3.98383	4.64979	4.00267	5.615	3.97938	5.2465	5.90623	4.716	4.34967	3.835
ADIPOR1	6.95746	6.62357	6.5779	6.34127	6.54976	6.61528	6.56714	6.59735	6.49897	6.51706	6.5004	6.77667	6.5869	6.53313	6.29221	6.79159	6.57444	6.61796	6.52762	6.48952	6.55286	5.7225	6.4675	6.0715	6.28222	6.03917	5.98633	6.16073	6.45283	5.785	6.40592
ADIPOR2	6.77742	6.73156	6.61913	6.60155	6.82836	6.7329	6.57667	6.58402	6.7319	6.67105	6.76728	6.77107	6.5669	6.61429	6.69321	6.75119	6.74048	6.76437	6.70938	6.78341	6.54846	6.72833	6.78083	7.0845	6.67983	6.66525	7.073	6.815	6.70633	6.983	6.50467
ADIRF	10.3075	10.2844	10.9073	10.7467	10.5538	10.9791	10.4921	10.0654	11.312	10.217	10.9052	10.0682	10.5951	10.8713	10.9164	9.70339	10.2122	10.4539	11.1655	10.8082	10.3158	11.5463	11.133	10.7544	10.766	11.27	11.135	10.667	11.133	11.0895	10.412
ADIRF-AS1	4.85214	5.06871	4.93821	4.64877	4.97719	4.81396	4.6159	4.80982	4.89802	4.65816	4.87131	4.54849	4.76673	4.72492	4.74694	4.91349	4.79468	4.85159	4.9406	4.89079	4.56103	5.029	5.21168	4.9715	4.56683	6.32938	4.89879	4.6945	5.175	6.04067	5.02715
ADK	6.14481	6.0686	5.53937	5.89079	5.95548	5.93683	5.88437	5.91871	5.96379	5.88797	5.8804	5.99095	5.77248	5.85206	5.77248	5.98706	5.9054	6.03226	5.94652	5.99755	6.00929	5.75054	5.83887	5.9605	5.7365	5.603	5.7485	5.77961	5.74467	5.9815	5.64375
ADM	9.07024	8.59317	7.77123	8.7074	7.83119	7.7521	8.40119	8.89512	8.01952	9.03952	8.43536	8.10643	8.03548	7.83913	7.86298	8.5503	9.1842	8.57167	7.34798	7.29175	7.83357	8.25342	9.85283	7.57137	9.188	9.367	7.9473	9.2366	9.86867	8.13875	8.79725
ADM2	4.71214	4.69137	4.92008	5.06313	4.74246	4.87555	4.78481	5.16956	4.94357	5.16349	4.88147	5.19881	4.57119	4.74345	4.88119	5.23444	4.90333	4.93172	5.02157	4.99635	5.525	5.09058	4.93133	4.71171	5.0735	4.99438	5.02	5.04213	5.1585	4.59437	4.76783
ADM5	3.57048	3.7129	3.82381	3.81405	3.75913	3.78443	3.80875	3.84792	3.61262	3.80397	3.88881	3.77889	3.77286	3.88556	3.89381	3.94143	3.89944	3.68952	3.70119	3.63389	3.59532	3.885	3.95	3.5925	3.982	3.82	3.85233	3.689	3.895	3.84479	3.9645
ADNP	6.8269	6.77706	6.96615	6.99087	7.11865	6.93734	7.03357	6.96758	6.93083	7.05393	7.01556	6.68151	6.96897	7.13743	7.06238	6.92625	6.94619	6.87389	6.99603	7.05159	7.06056	7.349	6.784	7.29	6.9245	7.11883	7.093	7.06908	6.80488	7.59875	6.994
ADNP2	5.12937	4.97779	5.03885	4.95597	5.13224	4.71452	5.16433	5.05851	4.89802	5.03365	5.11188	4.89238	4.98889	5.01667	4.89147	4.91349	4.92111	4.97143	4.98238	4.96973	5.09769	5.23525	5.1195	5.46413	4.9155	5.1925	5.04675	4.98487	5.175	5.21408	5.1445
ADO	5.30575	5.27269	4.95775	5.35325	5.58595	5.30175	5.29381	5.4031	5.37357	5.35591	5.28651	5.51738	5.17349	5.34476	5.19048	5.51988	5.37714	5.27067	5.39143	5.53944	5.22944	4.8175	4.7455	5.5045	5.06417	4.8175	5.28983	5.0882	4.8975	5.5545	5.0185
ADORA1	3.78905	3.8576	4.15952	4.22649	4.08079	4.10683	4.08852	4.08865	3.96381	4.13146	4.01143	4.15981	4.045	3.6748	4.02238	4.04889	4.11048	3.9931	3.98113	4.12525	3.83333	3.6615	3.8645	3.962	3.8325	3.628	4.056	3.931	3.9315	3.886	3.8755
ADORA2A	3.94302	4.05504	4.14746	4.04738	4.14369	3.88254	4.12024	4.01111	4.00095	4.21751	4.1763	4.04095	4.01897	4.02117	4.18352	4.05915	4.20867	4.00226	3.93159	4.09484	4.19881	3.92125	4.1345	4.03075	4.0875	4.0295	4.0365	3.93508	4.15142	4.069	4.056
ADORA2A-AS1	4.25795	4.00492	3.87647	3.90714	4.04738	3.99206	4.02365	4.09869	3.96964	4.13146	4.02103	4.06873	3.99214	3.96829	4.02238	4.14405	3.95619	3.95115	3.91024	4.03444	4.31095	3.65183	3.928	3.83133	3.982	3.96829	3.896	4.00382	4.0175	3.995	3.86592
ADORA2B	6.10948	5.93067	5.80849	5.58937	5.68287	5.58329	5.65841	5.58712	6.18042	6.22881	5.8973	6.01048	5.69841	5.53915	5.34147	6.02665	5.97534	5.84746	5.58495	5.44308	5.4973	4.2055	5.06846	4.4825	4.55625	3.905	4.60388	4.633	5.18208	3.564	5.38442
ADORA3	6.57698	5.2623	6.01333	5.70405	5.98239	6.18365	6.70593	6.02948	5.86056	5.76706	6.23532	6.51694	6.01143	5.83349	4.90321	6.55054	6.06349	5.22048	6.23788	6.36433	5.91633	4.4315	5.26029	4.098	5.83533	4.42483	5.47483	6.15517	5.2325	3.7205	4.4035
ADPGK	7.76143	7.17254	7.14929	6.95548	7.34313	7.13357	7.20786	6.98702	6.93881	6.99306	7.35071	7.25413	6.90655	6.96462	6.95929	7.445	7.12821	7.21996	7.14371	7.17234	7.0781	5.9595	6.60675	5.98792	6.40067	5.65483	6.014	6.4925	6.596	5.6935	6.69925
ADPRH	7.46095	7.33397	6.89488	6.83052	6.91056	7.10853	6.91655	7.03478	6.95579	7.12333	6.74911	7.06351	7.23476	6.83643	6.90321	7.03679	6.98452	7.27841	7.10659	7.08619	6.88024	5.9505	6.55371	6.2315	6.40858	6.244	6.4775	6.36108	6.5543	6.32875	6.65079
ADPRHL1	4.00845	3.86833	3.84409	3.88881	3.53143	3.84881	3.65881	3.99392	3.795	3.82444	3.74433	3.843	3.755	3.82212	3.63254	3.62246	3.88905	4.04913	3.98113	3.78087	4.16645	3.931	3.90387	3.804	3.843	3.77	3.771	3.961	3.953	3.77233	3.95175
ADPRHL2	5.56119	5.45286	6.02452	5.99468	6.07476	6.01162	6.21472	6.06754	6.13532	5.99389	6.0996	6.26614	5.98726	6.12298	6.05222	6.36762	6.20149	5.44063	5.9877	6.08429	5.92768	5.7264	5.8044	6.23875	5.75331	5.576	5.89967	5.73051	5.80492	5.5545	6.04517
ADPRM	5.90646	5.56107	5.94817	6.1404	5.93823	5.95286	5.91548	5.87587	5.92534	5.99389	5.83558	5.63706	5.64829	6.04611	5.89869	5.78087	5.94611	5.6877	5.9769	5.9154	6.18313	6.163	6.15517	6.0655	6.09535	6.06378	6.10837	6.05971	6.0815	6.41317	6.138
ADRA1A	4.83862	4.75111	4.73206	4.67585	4.68349	4.58607	4.80802	4.67389	4.69639	4.67278	4.65167	4.85722	4.81238	4.60433	4.59794	4.82437	4.6819	4.86913	5.01683	4.64032	4.65548	4.84775	4.71477	4.658	4.817	5.00183	4.7585	4.76167	4.787	4.564	4.83233
ADRA1B	6.01409	5.02999	6.58929	6.11169	6.76905	6.74357	6.59714	5.65865	6.81659	5.11167	6.6274	4.87231	6.03754	6.42385	5.8084	5.26492	5.89466	5.08155	6.29143	6.50557	5.7669	7.496	7.09683	8.0865	7.57517	7.18267	7.92767	7.422	7.0875	7.504	6.30407
ADRA1D	4.00845	3.8576	4.03548	3.70552	4.07146	3.86889	3.86571	3.69476	3.85326	3.79246	3.74433	3.67008	3.8073	3.88556	3.75286	3.81631	3.54643	3.85075	4.06393	3.65317	4.32913	4.74717	4.3405	4.61817	4.0526	4.99438	4.1635	4.096	4.225	5.8235	4.225
ADRA2A	6.49821	7.03095	5.26175	5.06871	5.86821	5.60175	5.04107	5.74619	5.0271	6.88389	5.16183	6.0659	5.51133	5.81413	6.14702	5.41263	4.63881	6.88831	5.93321	4.79484	5.63615	5.00183	5.23337	5.00067	6.02733	5.615	5.31987	5.969	5.38517	4.8075	6.392
ADRA2C	6.69286	5.75835	7.30595	6.74655	7.59016	5.95286	6.78627	5.56	7.14071	5.79719	6.45821	4.85214	6.22956	6.28915	6.54976	5.3224	5.89466	5.73952	7.13437	7.19587	6.3275	9.1165	9.249	8.8245	9.01358	9.299	9.667	8.9105	9.26925	9.629	7.31
ADRB1	3.96333	4.20657	4.21667	4.42524	3.93518	4.41675	4.0619	4.14921	4.18651	4.30298	4.4419	4.08873	3.88857	4.193	4.28413	4.17062	4.24087	4.0981	4.11738	4.45338	4.17849	4.10833	3.984	4.01075	4.138	4.28665	4.22333	4.195	4.00892	4.07517	3.9475
ADRB2	6.63595	6.65571	6.98278	6.53784	6.75976	7.07778	6.90726	7.09927	6.57975	6.79421	7.02885	7.07341	7.13214	6.6019	6.5973	7.08667	6.87615	6.59714	7.05214	7.20548	6.89071	6.05521	5.91083	5.18317	6.566	5.695	5.89967	6.576	5.92	5.45142	5.704
ADRB3	4.02667	4.14111	3.9623	4.17791	4.05399	4.06821	4.11568	4.08865	4.21857	4.1954	4.05065	4.15981	3.94603	3.76143	4.19794	4.29881	4.01238	4.12167	4.22841	4.01286	4.09976	3.95	4.12083	4.119	3.941	4.184	4.088	3.921	4.3005	4.11883	3.78717
ADRM1	7.1777	6.81369	6.55778	6.25933	6.50948	6.53784	6.40698	6.53264	6.59024	6.38138	6.59905	6.83095	6.46381	6.49984	6.44556	6.76127	6.61656	6.73706	6.61369	6.5669	6.53627	6.08237	6.4125	6.89375	6.25262	6.41269	6.4775	6.34217	6.4925	6.369	6.3407
ADSL	6.08952	6.01224	6.14967	6.30019	6.41893	6.45627	6.37087	6.30294	6.4419	6.46923	6.54238	6.45929	6.0484	6.23664	6.43762	6.70619	6.34481	6.05901	6.48825	6.46119	6.44029	6.493	6.15517	6.68	6.25262	5.8625	6.62	6.6089	6.23134	6.4045	6.35242
ADSS	6.60508	6.39603	6.60942	6.475	6.56722	6.68298	6.50933	6.26405	6.64127	6.64806	6.42659	6.22833	6.13844	6.49984	6.53881	6.51038	6.36214	6.47115	6.435	6.49595	6.65792	6.116	6.245	6.717	6.337	5.96933	6.4775	6.52117	6.23134	6.607	6.29325
ADSSL1	7.46722	6.78226	7.25087	8.09595	7.67976	7.3227	7.67956	7.08913	7.6253	7.10337	7.39238	6.37554	7.06857	7.43111	7.20016	6.6719	7.13706	6.86917	7.72558	7.27024	7.03798	7.57137	8.96075	7.06358	7.021	8.7275	7.252	6.977	9.00883	8.3675	7.359
ADTRP	5.9231	5.36984	5.10848	4.59385	5.29369	5.15341	5.55984	4.99942	5.32036	5.07185	5.39659	5.78685	5.31024	4.70758	4.52571	5.86198	5.36103	5.25905	4.96379	5.53286	4.75381	5.295	4.8975	4.10813	4.58263	4.029	4.098	4.5285	4.84133	4.551	4.3795
AEBP1	10.1477	10.17	10.7828	11.1307	10.17	10.8059	10.5538	10.4356	10.5993	10.1273	10.6641	10.4838	10.5494	10.695	10.7355	10.015	10.6386	10.1554	10.5143	10.4648	9.98206	9.0305	10.2416	10.0953	10.2655	10.3392	10.4635	10.354	10.334	10.1642	10.7145
AEBP2	6.14981	6.03333	6.21171	6.38389	6.45262	6.21429	6.37087	6.04619	6.30048	6.19103	6.31869	5.98595	6.03754	6.3759	6.39663	6.06916	6.21313	6.02167	6.17675	6.38627	6.21891	7.023	6.68	7.13042	6.79175	6.97583	7.063	6.65767	6.54375	7.415	6.46717
AEN	4.65339	4.51786	4.72226	4.79484	4.73095	4.95764	4.86222	4.94093	4.82615	4.91175	5.03167	4.79198	4.84845	4.9306	4.94071	4.83038	4.89261	4.67607	4.77394	4.94981	4.81063	4.3765	4.49225	4.8955	4.5965	4.4005	4.7135	4.609	4.5545	4.3405	4.6775
AFAP1	5.56119	5.2623	5.37357	5.06871	5.21	5.42163	5.00141	5.26743	5.25325	5.22171	5.43238	5.09246	5.24405	5.35548	5.33095	5.31304	5.13329	5.24653	5.54371	5.39194	5.10667	4.8275	5.50933	5.614	5.24577	5.84101	5.30096	5.17725	5.35414	5.65483	5.2885
AFAP1-AS1	3.8681	3.83913	3.75405	3.86712	3.82881	3.74643	3.79107	3.81381	3.77508	3.7731	3.86913	3.74303	3.8073	3.76143	3.81924	3.84849	3.81214	3.72278	3.78476	3.82183	3.73587	3.733	3.7845	3.8135	3.7845	3.738	3.761	3.85029	3.8645	3.803	3.895
AFAP1L1	7.03155	6.7519	6.93734	6.73804	6.87063	6.95266	6.59714	6.80287	6.88813	6.51071	6.76728	6.62675	6.83635	6.68082	6.60694	6.42385	6.52371	6.66375	6.3768	6.57722	6.39393	5.203	6.164	5.01063	6.0065	5.615	5.5945	5.8235	6.16825	5.7765	6.8855
AFAP1L2	4.54111	5.38198	5.09778	5.23728	5.19108	4.97719	5.4121	5.25757	5.04603	5.12255	5.09341	4.58845	5.41806	5.44578	5.27143	4.96632	5.04903	5.42139	4.91966	5.26333	5.24776	5.12221	5.03593	5.222	5.60383	5.418	5.4984	5.71892	5.143	5.633	5.54875
AFDN	5.26563	5.70972	5.68508	5.55754	5.26492	5.65671	5.40758	5.59516	5.4137	5.46643	5.48675	5.11544	5.59306	5.55694	5.55436	5.28425	5.42504	5.57726	5.58495	5.15095	5.53853	5.87758	5.85802	5.8095	5.79575	6.3235	5.872	5.66071	5.82421	6.11117	5.916
AFDN-DT	3.77349	3.91976	3.90246	3.76595	3.72437	3.79901	3.71151	3.82002	3.77508	3.83794	3.80603	3.77889	3.73206	3.92905	3.88317	3.84163	3.89289	3.88527	3.85815	3.80544	3.89302	4.00633	3.74967	3.819	3.75883	3.80417	3.76483	3.7865	3.75183	3.82	3.81133
AFF1	5.7769	5.78258	5.81486	5.59692	5.46259	5.60175	5.53675	5.78673	5.50337	5.68627	5.47881	5.58986	5.74881	5.68357	5.54536	5.50304	5.53036	5.67079	5.52105	5.36984	5.67143	5.54067	5.89257	5.2985	5.66633	5.91983	5.56333	5.75933	5.8932	5.773	5.88408
AFF2	3.67206	3.60964	3.78032	3.73421	3.63937	3.77032	3.76333	3.67	3.61746	3.69183	3.68952	3.63702	3.7381	3.66206	3.65877	3.69254	3.75508	3.80262	3.62175	3.64817	3.74627	3.73633	3.79783	4.42692	3.89758	3.68808	4.38225	3.972	3.699	3.71733	3.84083
AFF3	4.35492	4.25968	4.29698	4.2994	4.24087	4.31929	4.23817	4.32885	4.21429	4.27198	4.16937	4.12651	4.45601	4.29	4.2502	4.12851	4.33968	4.25825	4.25116	4.2577	4.22821	4.66725	4.45283	4.85617	4.3955	5.071	4.50517	4.28339	4.48033	4.966	4.4035
AFF4	6.29252	5.90459	6.1712	6.09437	6.03917	6.07397	5.96471	6.06163	6.08704	6.03133	5.90343	5.94646	5.93032	6.15714	6.05222	6.0646	5.98595	5.87825	6.05329	5.97813	6.02706	6.3164	6.32283	6.58317	6.16971	6.6089	6.4775	6.28333	6.29567	6.607	6.299
AFG1L	5.5711	5.3473	5.14849	5.1377	5.13224	5.10095	5.35478	5.13629	5.24081	5.22171	5.21294	5.51738	5.34437	5.29345	5.00325	5.44581	5.4973	5.30675	5.25621	5.02075	5.30304	4.87375	4.82896	4.82317	5.03746	4.715	5.10213	5.09917	5.01267	4.83988	5.06455
AFG3L1P	5.99508	6.04198	6.24825	6.11169	6.22119	6.1788	5.96471	6.28837	6.22518	6.31925	6.23532	6.13905	6.20006	6.06202	6.35107	6.20163	6.13111	6.06516	6.22837	6.2006	6.28597	6.16717	6.1155	5.87771	5.84958	6.07833	6.03217	5.99012	5.9785	5.80437	6.32698
AFG3L2	5.20127	5.25098	5.61655	5.5447	5.4225	5.44806	5.57552	5.46063	5.61786	5.40603	5.46428	5.67516	5.40536	5.36731	5.4225	5.70027	5.51496	5.24653	5.57238	5.3423	5.22944	5.26683	5.46067	5.51503	5.3175	5.3935	5.3935	5.4175	5.40633	5.21408	5.49775
AFM	3.74754	3.73238	3.47857	3.70552	3.70246	3.40286	3.98429	3.88931	3.77508	3.76508	3.69476	4.18087	3.96466	3.71841	3.88317	3.95238	4.94955	3.62381	3.61524	3.69548	3.65353	3.79943	3.725	3.837	3.645	3.6775	3.8725	3.72	4.0655	3.588	3.7585
AFMID	4.85726	4.43607	4.62004	4.53719	4.43055	4.48155	4.68079	4.53151	4.51306	4.59047	4.58415	4.55417	4.45205	4.57131	4.5506	4.59794	4.60183	4.58841	4.69218	4.52008	4.68607	4.27329	4.59	4.28175	4.56683	4.48	4.54592	4.44142	4.649	4.3895	4.543
AFP	3.58988	3.74347	3.72349	3.48476	3.89754	3.57774	3.86571	3.68612	3.70929	3.56774	3.65272	3.74303	3.64548	3.77115	3.81924	3.83828	3.60837	4.03147	3.5969	3.61131	3.9173	4.3415	4.13873	4.9605	3.8525	4.11717	4.27767	4.056	3.985	4.34967	3.7585
AFTPH	6.92873	6.90992	6.62476	6.72262	6.80619	6.7329	6.7626	6.74748	6.76905	6.79421	6.77349	6.79861	6.86159	6.8046	6.76952	6.79573	6.75865	6.81976	6.68476	6.70742	6.8	6.63883	6.76583	6.70967	6.5385	6.6215	6.75621	6.6765	6.781	6.86175	6.57423
AGA	6.75655	6.40571	6.53663	6.485	6.36	6.60532	6.09788	6.347	6.36067	6.37313	6.46972	6.43238	6.45452	6.20163	6.41786	6.71508	6.30238	6.38492	6.498	6.58929	6.39393	6.06583	5.834	5.88867	5.8915	5.9505	6.2475	5.9285	5.86183	6.20863	6.4945
AGAP1	4.64278	4.83389	4.58599	4.8006	4.73667	4.90333	4.64278	4.97347	4.6377	4.66802	4.65167	4.7169	4.9519	4.72048	4.84794	4.79349	4.7496	4.74058	4.89095	4.67135	4.67449	4.98271	5.05883	4.83119	4.848	5.2015	5.1445	4.714	5.022	4.93085	5.013
AGAP1-IT1	3.74754	3.93087	3.93119	3.82381	3.87741	3.84881	3.99427	3.92214	3.89119	4.05929	4.04095	3.98212	3.9854	3.97333	3.77437	4.04889	3.88905	4.10063	3.77381	3.84157	3.9173	3.595	3.7365	4.0455	3.80283	3.81067	3.942	3.7505	3.8745	3.81433	3.78717
AGAP11	5.11317	5.37369	5.45	5.5447	5.7846	5.47869	5.51839	5.79611	5.60681	5.69056	5.34744	5.55786	5.65782	5.45667	5.53139	5.54833	5.57532	5.33587	5.64362	5.57035	5.55333	5.51042	5.451	5.614	5.4365	5.59292	5.28983	5.12683	5.34369	5.3525	5.75433
AGAP2	5.23071	4.94746	4.95775	4.65897	4.86747	4.64024	4.95906	4.88817	4.71715	4.77131	4.72262	4.86214	4.99833	4.68518	4.53202	4.75127	4.76298	5.05235	4.6669	4.60762	4.65052	4.2155	4.4515	4.21533	4.60933	4.24567	4.006	4.31683	4.49408	3.97025	4.5265
AGAP2-AS1	5.26067	4.97779	4.94847	4.74623	4.675	4.96774	4.67421	4.70143	4.79294	4.54008	4.70206	4.60929	4.62925	4.70381	4.66393	4.69675	4.71358	4.94905	4.89095	4.62675	4.87838	4.30177	4.564	4.41117	4.61725	4.3195	4.776	4.756	4.677	4.29158	4.92192
AGAP3	8.25313	8.15192	7.88833	7.8963	8.12786	7.81849	7.93103	8.12786	8.0931	8.15405	7.95286	8.41698	7.91	7.87738	7.78643	8.20524	7.98536	8.16405	7.61421	7.85563	7.88659	7.111	7.6105	7.098	7.518	7.76525	7.4455	7.59533	7.5901	7.5275	7.801
AGAP4	4.25192	4.04238	4.54167	4.31706	4.22754	4.36738	4.47429	4.27852	4.35899	4.43841	4.27567	4.24762	4.35968	4.54206	4.29374	4.47738	4.45593	4.02667	4.27749	4.3402	4.12513	4.28867	4.4785	4.60967	4.1285	4.30125	4.31633	4.36817	4.3634	4.48892	4.39417
AGAP7P	5.5297	5.75305	6.23728	5.94746	6.10648	6.01486	5.85355	6.08546	5.96913	5.93887	5.83238	5.97857	5.77611	5.92861	6.06952	5.97464	5.85879	5.70937	6.13905	5.96325	6.03369	6.01808	5.88867	5.9382	5.71583	6.00783	5.634	5.61067	5.82421	5.50658	6.09829
AGBL1	4.21653	4.05504	4.11782	4.07274	4.02071	4.01054	4.29	4.07349	4.22359	4.14656	4.10661	4.15008	4.14901	3.9434	4.09381	4.08669	4.16571	4.27648	4.17648	4.1181	4.08968	3.97475	4.2355	3.962	4.0875	4.00337	4.11	4.08208	4.07508	3.995	3.987
AGBL1-AS1	3.80643	3.49488	3.64357	3.59857	3.77556	3.69435	3.57262	3.85825	3.85326	3.81377	3.69476	3.76738	3.89558	3.78151	4.21881	3.71952	3.86913	3.73327	3.80494	3.72968	3.55595	3.7515	3.8435	3.68	3.89367	3.738	3.5975	3.64217	3.85408	3.84479	3.78717
AGBL2	3.92929	3.93087	4.13119	4.05079	3.94095	4.14992	3.80875	4.04738	4.07781	4.05929	3.93891	3.843	3.89558	4.09524	4.01254	3.72992	4.21913	3.97333	3.99252	4.05262	4.24675	3.9035	3.8645	3.91983	3.86375	3.82	3.7395	3.98123	3.84567	3.8755	4.10067
AGBL3	4.68079	4.27214	4.2977	4.14748	4.10929	4.23385	4.06056	4.1679	4.17405	4.14683	4.16937	4.24167	4.32048	4.1129	4.25964	4.44692	4.24087	4.46088	4.38143	4.23881	4.28226	4.2685	4.29	4.21533	4.26	4.2055	4.2895	4.2685	4.13067	4.5205	4.235
AGBL4	4.08929	4.06988	3.99905	4.09298	4.07639	3.96528	4.01143	4.11325	4.00046	3.80964	3.95377	3.93374	3.91585	3.99671	4.09353	4.04401	4.1204	4.09052	4.00774	3.96155	3.97861	3.98825	4.068	4.01075	4.03775	3.9935	4.11642	3.87817	4.07825	4.06508	3.92075
AGBL5	4.13685	4.21127	4.34071	4.17791	4.34996	4.39849	4.435	4.27852	4.52762	4.4996	4.45683	4.52837	4.07817	4.46532	4.32877	4.26905	4.26667	4.02155	4.36512	4.36095	4.51758	4.4819	4.43283	5.02092	4.28	4.6406	4.5715	4.54133	4.389	4.666	4.318
AGER	4.87671	5.07409	5.18625	4.99337	5.03021	4.88071	4.81837	4.98653	4.75021	4.76516	4.85563	4.97601	4.99222	4.97011	4.84024	4.96932	4.80733	5.00474	4.88048	4.865	4.89048	4.91625	4.81375	4.54867	4.817	4.96917	4.62858	4.74017	4.69417	4.6015	4.91767
AGFG1	5.23071	5.97222	6.20012	6.42202	6.01333	6.25584	6.10937	6.47028	6.04433	6.57522	6.16544	6.28437	6.2906	6.30845	6.29221	6.28119	6.17397	6.04321	6.22837	6.03667	6.00929	6.45117	6.7105	6.37667	6.83908	6.393	6.566	6.53188	6.617	6.293	6.7505
AGFG2	4.64107	4.60306	4.47548	4.44397	4.39361	4.46667	4.51619	4.41619	4.39467	4.45205	4.52087	4.39833	4.39893	4.33524	4.45127	4.32016	4.54397	4.58841	4.43464	4.47548	4.44061	4.43525	4.48233	4.778	4.5735	4.6995	4.5985	4.67108	4.616	4.63692	4.66345
AGGF1	5.94524	6.0686	6.13929	6.12067	6.27669	5.99313	6.2394	6.07802	6.04433	6.11964	6.2463	6.15944	6.02871	6.22559	6.04119	6.05951	6.14831	6.10151	6.0823	6.21667	6.12357	6.29967	5.66683	6.357	6.144	5.635	6.03217	6.15517	5.64692	6.1523	6.21254
AGK	5.74714	5.37369	5.33052	5.32591	5.25183	5.23167	5.24402	5.35992	5.21182	5.33488	5.24806	5.49469	5.30532	5.31421	5.29905	5.27644	5.28008	5.32581	5.34201	5.22722	5.38383	5.4405	5.418	5.60333	5.04575	5.418	5.3935	5.156	5.289	5.614	5.31617
AGL	6.22881	6.19032	6.17833	6.24968	6.535	6.4381	6.31881	6.25468	6.37091	6.13077	6.40857	6.08704	6.01143	6.3869	6.32901	6.2271	6.2427	6.09103	5.96079	6.37478	6.15067	7.023	6.274	6.9635	6.596	6.55917	6.826	6.782	6.14973	6.994	6.00157
AGMAT	4.37087	4.35262	4.13119	4.08905	4.10266	4.16976	4.33893	4.27852	4.16847	4.55579	4.47716	4.51952	4.79669	4.51448	4.06905	4.23768	4.37963	4.28099	4.075	4.44772	4.21034	3.865	3.95	3.962	4.002	3.96829	3.88117	3.951	3.922	3.752	3.915
AGMO	3.94929	4.07577	4.14099	4.11015	4.04317	4.25857	4.14302	3.76829	3.72685	3.66429	3.93891	4.55917	3.86635	3.69734	3.89381	4.02929	4.03175	3.96272	3.89952	4.00333	3.77381	4.012	4.172	4.268	4.26979	4.067	4.5583	4.47125	3.915	4.442	4.4035
AGO1	6.76817	6.96462	6.7446	6.95548	6.80214	6.70504	6.81548	6.87895	6.87429	6.88389	6.70619	6.94071	6.86159	6.77714	6.84996	6.78611	6.77706	6.97476	6.73663	6.80746	6.83119	6.8525	6.81267	6.62308	6.566	6.945	6.78275	6.5615	6.781	6.92967	6.846
AGO2	5.64345	5.64675	5.7637	5.89897	5.69377	5.74762	5.72603	5.90714	5.80849	5.81226	5.68262	5.74998	5.84282	5.92476	5.78347	5.70027	5.5654	5.63396	5.69381	5.51877	5.69381	5.93767	6.23912	6.12083	6.04085	6.44585	6.05567	5.9215	6.15433	6.0735	5.901
AGO3	6.63984	7.03095	7.22706	7.19758	7.01683	6.97952	7.09766	7.24278	7.00595	7.21698	6.9119	7.06351	7.20129	7.14222	7.08667	7.03214	7.04333	7.01349	6.86357	6.88591	7.1831	7.52817	7.23692	7.0315	7.16783	7.4185	7.12725	7	7.294	7.2935	7.349
AGO4	5.90646	6.05024	6.3731	6.40204	6.28687	6.14011	6.56714	6.40786	6.26917	6.1621	6.27821	6.65115	6.35902	6.33119	6.06145	6.31107	6.26614	6.02167	6.29143	6.05989	6.08913	6.2655	6.2355	6.116	6.27367	6.4325	6.1445	6.105	6.201	6.0735	6.43317
AGPAT1	7.5906	7.68794	7.57583	7.60306	7.435	7.56444	7.5196	7.44631	7.5654	7.55782	7.47198	7.48341	7.59679	7.51405	7.5625	7.38774	7.53976	7.63611	7.61421	7.4221	7.56667	7.57137	7.383	7.1995	7.31165	7.4635	7.421	7.47175	7.43592	7.1655	7.554
AGPAT2	9.4154	9.4881	9.11131	9.11405	9.25728	9.25238	9.32588	9.30786	9.31048	9.06952	9.21343	9.33661	9.375	9.13208	9.07357	9.375	9.1842	9.3477	9.16345	9.09964	9.01482	8.22925	9.03933	8.27983	9.349	8.43579	9.16442	9.4795	8.931	8.4885	8.86838
AGPAT3	7.5304	7.00381	6.84266	6.74655	6.79476	6.81033	6.68722	6.81262	6.84798	6.8131	6.965	7.18111	6.74373	6.74619	6.74775	7.04627	6.81333	6.95536	6.72101	6.88591	6.86857	5.6125	6.22417	6.222	6.348	5.9961	6.23101	6.12587	6.183	6.19879	6.44321
AGPAT4	5.87978	5.5577	5.76176	5.64821	5.61925	5.985	5.7436	5.73421	5.75484	5.85151	5.8295	5.89317	5.73335	5.84679	5.54337	5.8626	5.74724	5.49778	5.66944	5.7377	5.3998	4.98775	5.76142	5.16192	5.17133	5.4475	5.382	5.173	5.69967	5.074	5.59392
AGPAT4-IT1	7.86092	6.88071	6.76786	6.5577	6.56722	6.77857	6.53004	6.84119	6.62929	6.94802	6.63887	6.82087	6.92571	6.74619	6.34056	6.89103	6.99472	6.93833	6.62476	6.75585	6.49547	5.80533	6.285	5.38313	5.53933	5.74167	5.4984	5.47808	6.2745	5.52508	6.43317
AGPAT5	5.25079	5.41238	5.29219	5.47216	5.50619	5.39909	5.35478	5.41263	5.29282	5.36796	5.36762	5.24837	5.20337	5.41442	5.39173	5.54833	5.38837	5.50476	5.26292	5.20583	5.4548	5.3935	5.3775	5.14796	5.0215	5.04908	5.156	5.239	5.165	5.39923	5.429
AGPS	6.28669	6.18067	6.31881	5.97667	6.13454	6.22468	6.3431	6.14905	6.08704	6.0399	6.2731	6.47635	6.17675	6.20619	5.9269	6.41052	6.28159	6.08159	6.19095	6.22802	6.10837	6.16717	5.82735	6.14164	6.01808	5.76617	5.77923	6.00642	5.7885	6.16621	5.98055
AGR2	3.73992	3.81671	3.55881	3.89881	3.94095	3.71413	3.57262	3.81381	3.88286	3.66429	3.7046	3.69254	3.85476	3.6019	3.93369	3.72992	3.87921	3.96272	4.03325	3.91971	3.73587	3.761	3.773	4.0455	3.7735	3.6685	3.699	3.85029	3.895	3.792	3.85533
AGR3	3.73992	3.79478	3.54952	3.74762	3.96833	3.69435	3.92556	3.71619	3.94505	3.99214	3.62107	3.85528	3.71119	3.65746	3.54667	3.65405	3.87921	3.81895	3.84948	4.08044	3.80397	3.617	3.754	3.742	3.90352	4.11717	3.678	3.729	3.885	3.97025	3.689
AGRN	6.83103	6.73156	6.60942	6.30019	6.24802	6.68298	5.80832	6.04619	6.43206	5.95286	6.39825	6.45929	6.35004	6.43413	6.34056	6.3953	6.53925	6.76437	6.26976	6.25726	6.51651	5.676	5.941	5.70483	5.87133	6.34	6.07125	5.90623	5.94	5.941	6.21254
AGRP	5.93603	5.00952	5.36389	5.19548	5.21	5.06676	5.91548	5.25757	5.44677	5.43333	5.35802	5.65377	5.71894	5.33452	4.71214	5.63964	5.40698	4.88944	5.16151	5.25481	5.1649	4.2155	4.31	4.00267	4.411	4.15317	4.26833	4.51033	4.225	3.95	4.58037
AGT	6.0554	8.39571	6.90452	8.16417	7.87881	7.64472	6.59714	7.29607	7.72905	7.75111	7.02885	6.55671	6.84603	7.57	7.97033	6.77155	7.99944	8.38089	7.3269	7.41032	7.13905	7.31717	8.0575	7.328	8.32467	8.43579	7.51925	8.39125	8.082	7.94633	9.0635
AGTPBP1	5.52071	5.65617	5.87849	5.93357	5.8279	5.71444	5.90714	5.96857	5.70786	6.09595	5.8544	6.00429	5.7377	5.92476	5.90954	5.90246	5.81921	5.68168	5.82639	5.90857	5.97754	5.86125	5.92525	6.004	5.77633	5.70433	5.8525	5.89017	5.72967	6.1265	5.8985
AGTR1	4.03722	3.82776	3.57762	3.78242	4.17643	3.41929	4.04855	3.99392	3.83369	3.80397	3.81131	3.79077	3.9854	3.74992	3.69845	3.76238	3.78252	3.81895	3.99252	3.88155	3.6202	5.13183	4.516	5.25267	4.72133	4.828	5.10213	4.8485	4.369	6.03	4.5265
AGTR2	3.75405	3.76857	3.75405	3.79595	3.63389	3.62929	3.72722	3.73748	3.78198	3.86529	3.76258	3.78262	3.81206	3.82805	3.7419	3.87286	3.78748	3.73327	3.68365	3.76544	3.6719	3.6985	3.7405	3.7365	3.771	3.78917	3.792	3.8055	3.7635	3.9315	3.73225
AGTRAP	5.95302	5.828	5.96103	5.64135	5.97226	5.82522	6.14921	5.8152	5.75865	5.7575	6.06986	6.3098	5.89349	5.88901	5.72506	6.38663	6.127	5.76472	5.89798	6.00746	5.97754	5.0365	5.71967	5.6765	5.675	5.165	5.72443	5.89667	5.734	4.5025	5.611
AGXT	4.22042	4.31471	4.19091	4.1381	4.35881	4.29909	4.12494	4.19754	4.28619	4.08087	4.00262	4.15008	4.21712	4.2644	4.05913	4.15619	4.13079	4.19615	4.24698	4.08968	4.23455	4.23475	4.33	4.33	4.21383	4.24567	4.0165	4.3425	4.21525	4.088	4.215
AGXT2	3.51222	3.88925	3.74425	3.70552	3.78683	3.56786	3.72317	3.56952	3.69683	3.65452	3.65272	3.70286	3.73002	3.6748	3.61071	3.64381	3.69786	3.45214	3.51833	3.62218	3.7648	3.8385	3.673	3.7835	3.823	3.556	3.58	3.689	3.503	3.62729	3.973
AHCTF1	4.94952	5.04976	5.12325	5.35325	5.12214	5.21383	5.19185	5.13629	5.25913	5.34468	5.12381	5.14098	5.07032	5.30798	5.28214	5.16528	5.18845	5.0291	5.19069	5.12448	5.16021	5.705	5.59317	5.67017	5.418	5.753	5.5275	5.46667	5.54321	5.9785	5.5175
AHCYL1	7.57829	7.52302	7.41327	7.4261	7.39202	7.46357	7.42357	7.45329	7.4146	7.42476	7.46595	7.52151	7.3223	7.35786	7.37508	7.49548	7.51131	7.55905	7.49595	7.41357	7.35095	7.23092	7.45267	7.3935	7.38275	7.5815	7.4455	7.377	7.45325	7.629	7.5455
AHDC1	5.71908	5.90907	5.76706	5.77583	5.70972	5.70393	5.51407	5.72056	5.78167	5.61235	5.61706	5.75651	5.74377	5.62771	5.7556	5.58941	5.67651	5.85741	5.80522	5.65643	5.89714	5.823	5.879	6.0465	5.773	6.25933	5.90725	5.69358	5.97242	5.872	5.804
AHI1	4.857	4.91949	4.94365	4.93777	4.83329	4.88071	4.9496	4.92871	4.94206	5.03899	4.91349	4.97582	4.92496	4.94357	4.94929	4.94869	4.86968	4.92068	4.94481	4.8588	4.87312	5.37067	5.08204	5.27417	5.08117	5.3865	5.08092	5.082	5.24112	5.52983	5.28217
AHNAK	8.10937	8.23675	8.62183	8.68675	8.73897	8.86714	8.56237	8.76738	8.67976	8.5969	8.60581	8.63921	8.68267	8.66774	8.72869	8.74053	8.77603	8.28135	8.85135	8.68992	8.48873	8.75433	8.62583	8.77283	8.7655	9.17833	8.96525	8.69483	8.58892	8.7505	8.76267
AHNAK2	5.27452	5.54357	6.26125	6.07549	5.75906	6.3933	5.96471	6.28837	6.09937	5.98706	5.77738	6.15357	6.22956	6.08952	6.12067	6.25167	6.22387	5.58712	6.15676	5.94921	5.83472	5.26683	5.68317	5.54842	5.4495	5.24153	6.1875	5.26517	5.66088	5.324	6.155
AHR	7.61766	7.32409	7.59917	7.33079	7.73063	7.63381	7.43702	7.30595	7.32655	7.48548	7.58984	7.34548	7.02363	7.32881	7.37024	7.59709	7.45024	7.43333	7.24349	7.51262	7.65675	7.62225	6.97325	7.45258	7.44317	6.761	7.45325	7.6145	7.0026	7.405	7.199
AHRR	3.7303	3.97286	4.00286	3.97024	4.15397	3.91786	4.15079	3.77905	4.09838	4.05929	3.80198	3.82183	4.13843	3.925	3.90381	4.07929	3.98167	3.96272	3.815	3.77175	3.90873	3.875	4.4165	3.7835	3.8525	3.895	3.535	3.88713	4.389	3.803	3.895
AHSA1	6.41163	6.46223	6.84266	6.73804	6.94492	7.04529	6.96587	6.81262	6.96724	6.94802	7.05984	6.95524	6.7002	6.98488	6.91425	7.14964	6.96317	6.46203	6.895	7.05159	6.89071	6.482	6.862	7.00858	6.83908	6.804	7.0115	6.987	6.8695	6.69	6.718
AHSA2P	5.66419	5.82275	5.92679	5.85012	5.87389	5.78108	5.97222	6.1619	5.77956	5.81417	5.90343	5.88569	6.01512	5.91798	5.96103	5.92226	5.91073	5.80874	5.99397	5.97425	5.96491	6.14625	5.82735	5.53779	5.86687	6.02383	5.75765	5.74342	5.85533	6.0338	6.13413
AHSG	3.96714	3.97286	3.77339	3.84556	3.93123	3.9081	3.84845	3.81381	3.95496	3.95024	3.88881	4.09754	3.79919	3.87619	3.974	4.05915	3.88905	4.00226	3.92143	4.03444	3.88714	3.9135	3.832	3.85775	3.89367	4.05633	3.9745	3.89735	3.728	4.0985	3.72
AHSP	4.37087	4.86556	3.97246	3.81405	3.98762	4.40762	4.32921	4.37095	4.31373	4.14119	3.7919	4.32016	4.84845	4.05738	3.94206	4.00802	4.05917	4.98058	4.04238	4.0619	4.15603	4.0375	4.068	3.91983	4.106	3.96829	3.761	3.85977	4.0655	4.129	4.0805
AICDA	3.88738	3.65	3.79262	3.89881	3.82071	4.00095	3.97496	3.77905	4.00368	3.88714	3.63333	3.69254	3.78198	4.02929	3.8081	4.06857	3.76143	3.75359	3.96119	3.99357	3.83333	3.95	3.822	3.85775	3.9135	3.7785	3.8325	3.90798	3.953	3.8755	3.7585
AIDA	4.72214	4.50587	4.55032	4.8006	4.77782	4.87063	4.63838	4.75975	4.9396	4.79109	4.94334	4.80781	4.62536	4.6669	4.73803	4.77913	4.66048	4.64905	4.95234	4.90167	4.76476	4.66933	4.64979	5.12283	4.83867	4.89917	4.98333	4.85767	4.70417	4.75367	4.66917
AIF1	7.42393	7.32929	7.30119	7.42345	7.26024	7.07178	7.305	7.36952	7.09633	7.3846	7.23738	7.41357	7.57333	7.30698	7.2696	7.42357	7.39286	7.47504	7.38524	7.38357	7.33667	6.91	6.94	6.3405	6.9745	6.23842	6.726	6.9835	7.05025	6.30958	6.93667
AIF1L	4.77845	4.7329	4.94129	4.55131	4.9019	4.86727	4.80413	4.6221	5.01283	4.70325	5.16697	4.84889	4.88921	4.82893	4.6871	4.98012	4.84155	4.78103	5.18382	5.0606	5.03452	5.15383	5.40383	4.92196	5.2345	5.53633	5.03742	5.18325	5.34369	5.344	5.15925
AIFM1	7.48643	7.3523	6.81976	7.355	7.435	7.36524	7.56869	7.28571	7.48548	7.29476	7.28615	7.6074	7.49548	7.46	7.24881	7.56619	7.49786	7.46921	7.3269	7.33421	7.125	6.7925	7.03017	6.8305	7.20017	6.8785	6.96283	7.09625	7.15475	6.7695	7.128
AIFM2	5.10327	5.20726	5.22722	5.18167	5.22461	5.23167	5.10571	5.335	5.22496	5.19857	5.16825	5.3753	5.3925	5.15893	5.19048	5.42175	5.3925	5.23472	5.22948	5.26992	5.11937	5.10658	5.1425	5.3335	5.165	5.23337	5.10213	5.17	5.24637	5.1665	5.0915
AIFM3	4.84258	4.65127	4.53687	4.44397	4.85954	4.75216	4.78089	4.73087	4.55853	4.37975	4.6325	4.91198	4.54762	4.815	4.24079	4.71792	4.72468	4.52563	4.69819	4.80361	4.46425	4.0555	4.2985	3.804	4.351	4.15317	4.078	4.138	4.8705	3.9915	4.20467
AIG1	6.58131	6.3225	6.70274	6.71409	6.67107	6.63923	6.75325	6.63528	6.63847	6.5577	6.64393	6.57845	6.72917	6.6019	6.73917	6.58976	6.50568	6.35147	6.75702	6.71615	6.51651	7.28975	6.86858	6.88508	6.815	7.22525	6.88092	6.916	6.851	7.36175	6.69225
AIM2	5.90646	6.18067	6.63658	5.69278	5.86048	5.92195	5.95452	5.60778	6.02413	6.51071	5.97857	5.6848	6.44581	5.47829	6.02238	5.54833	5.70845	6.10151	5.49504	5.97813	6.1321	4.52093	5.487	4.0655	5.10267	4.48992	4.24675	5.0255	5.4385	4.01063	5.52783
AIMP1	7.4025	7.40238	7.43714	7.50472	7.36095	7.33274	7.55937	7.54605	7.44262	7.60679	7.42381	7.38421	7.415	7.60349	7.48595	7.33786	7.44008	7.44421	7.37	7.40137	7.52571	7.9085	7.54704	7.8625	7.50517	7.53267	7.56242	7.453	7.555	7.851	7.554
AIMP2	7.07976	6.90528	6.73933	6.70619	6.78444	6.83099	6.85782	6.79325	6.82929	6.9269	6.86671	6.93615	6.66529	6.81448	6.66254	6.96471	6.91143	6.89548	6.94206	6.79456	6.90274	6.3215	6.503	7.11583	6.6365	6.27065	6.49975	6.74083	6.3405	6.5385	6.5855
AIP	7.87905	7.65286	7.86827	7.83738	7.77095	7.96496	7.80095	7.71421	7.88786	7.72881	7.98095	7.8522	7.76016	7.86274	7.98869	7.82833	8.01214	7.7004	7.98238	7.97452	7.99032	7.98717	7.9155	7.766	7.71317	7.84125	7.96364	7.80333	7.822	8.083	7.818
AIPL1	3.67905	3.6719	3.86656	3.94063	3.67254	3.71413	3.61214	3.68612	3.89119	3.81377	3.85984	3.64817	3.74571	3.6748	3.42976	3.61214	3.55881	3.65817	3.7631	3.64298	3.75706	3.64567	3.6445	3.68	3.556	3.6685	3.7395	3.729	3.678	3.782	3.55625
AIRE	4.26167	4.37133	4.19091	4.43347	3.90627	4.24929	4.25071	4.08865	4.26659	4.3594	4.16937	4.51952	4.33722	4.21635	4.44184	4.53179	4.36008	4.48567	4.31623	4.35061	4.48532	4.87375	4.351	4.8815	4.25333	4.48992	4.7975	4.5015	4.3595	4.64475	4.492
AJAP1	3.9977	4.29976	3.9623	3.945	3.99252	4.02325	3.93976	3.94024	4.01405	3.97496	4.01143	4.03141	3.9409	4.13683	3.87833	3.90619	3.68841	4.28711	3.65762	4.1181	3.98578	3.7515	3.967	3.91983	3.8285	3.7205	3.786	3.915	3.8585	3.97025	3.95175
AJM1	3.73992	3.62833	3.79262	3.85603	3.72881	3.9081	3.96472	3.79052	3.58714	3.75607	3.82103	3.61571	3.7631	3.83325	3.8081	3.85825	3.64817	3.71224	3.72181	3.83159	3.6619	3.789	3.673	3.659	3.72658	3.7175	4.0165	3.632	3.90467	3.865	3.671
AJUBA	5.08143	5.01808	5.01786	5.72556	5.53619	5.71444	5.43413	5.15282	5.46395	5.04254	5.54353	4.75452	5.56079	5.81413	5.57683	4.95714	5.10202	5.19056	5.49504	5.5869	5.11937	5.6545	5.28	5.91	5.60383	5.773	5.70517	5.625	5.2325	6.1195	5.10658
AK1	5.42284	5.39143	5.22135	5.1304	5.30611	5.53667	5.29381	5.25757	5.4137	5.17357	5.09341	5.3366	5.16337	5.15893	5.24181	5.07028	5.27056	5.48516	5.30512	5.25481	5.34423	5.3085	5.47788	5.4375	5.28767	5.418	5.156	5.365	5.417	5.43783	5.24452
AK2	6.37465	6.47305	6.23664	6.40629	6.24469	6.23957	6.34162	6.3003	6.31044	6.2826	6.23532	6.26986	6.26614	6.18085	6.34481	6.34621	6.34481	6.50281	6.27367	6.2659	6.2494	6.22687	6.33565	6.36263	6.2021	6.1553	6.13658	6.0639	6.30217	6.2778	6.21916
AK3	6.41643	6.7123	5.95548	6.89452	6.75976	6.89262	6.80381	6.71641	6.77107	6.85476	6.68476	6.46833	6.64786	6.82079	6.92131	6.64635	6.57827	6.64829	6.80381	6.74655	6.54276	7.12437	6.9035	7.359	6.95817	6.95467	6.90708	7.20142	6.88679	7.18383	6.671
AK4	6.37465	6.32515	6.15746	6.59762	6.74254	6.35704	6.49302	6.22329	6.66508	6.33905	6.55754	6.21734	6.46778	6.32587	6.42389	6.21976	6.23643	6.29889	6.60032	6.35274	6.20149	6.533	7.01867	6.62667	6.43367	6.90233	6.37933	6.433	7.03433	6.64617	6.60033
AK5	4.11817	4.08836	4.04615	4.07952	3.97317	4.4523	4.06056	4.13931	3.88286	3.95413	4.18746	4.14071	4.25571	4.28452	4.04722	4.19658	4.09584	4.1694	4.1881	4.16889	3.94183	4.0555	4.16433	4.10183	3.9725	4.24267	4.19467	4.1291	4.18017	4.45933	4.15633
AK6	6.85214	6.89611	7.10524	7.24032	7.18786	7.23143	7.3144	7.07913	7.21615	7.32151	7.17056	7.1619	7.02363	7.25048	7.09905	7.43155	7.21817	7.01349	7.16905	7.22357	7.16976	7.389	6.91175	7.48933	7.09958	7.10958	7.3045	7.16575	7.0026	7.51375	7.0415
AK7	3.77875	3.96228	3.84409	3.80385	3.80444	3.76667	3.85548	3.73748	3.80452	3.82444	3.78266	3.8327	3.8073	3.79087	3.79756	3.79447	3.86913	3.79855	3.82714	3.86119	3.83333	4.06417	3.7845	3.85775	3.80283	3.7485	3.728	3.82917	3.79567	3.896	3.845
AK8	5.7669	6.20048	5.04863	5.12083	5.19108	5.2894	4.68349	5.09751	5.91645	4.89095	5.12099	5.46181	5.58802	5.43641	4.81857	5.76134	5.4973	6.09103	4.88048	5.57035	4.82504	4.27329	4.533	4.35333	4.401	4.5195	4.9325	4.58263	4.60113	4.6935	4.461
AK9	3.94281	3.98663	4.0675	4.03059	3.96833	4.06035	4.10094	4.02306	4.01068	3.91097	3.974	3.94881	3.97536	4.0854	3.9867	3.88494	3.9451	3.87206	4.03325	3.94231	3.8439	4.08597	3.967	4.0655	3.9659	4.022	4.04225	3.9654	3.922	4.0232	3.992
AKAIN1	3.74754	3.81671	3.5256	3.6727	3.59992	3.82762	3.74296	3.81381	3.98425	3.59381	3.64286	3.843	3.78198	3.79087	3.66357	3.81631	3.81214	3.87206	3.65762	3.69548	3.54131	3.7805	3.581	3.742	3.645	3.68808	3.58	3.6705	3.67	3.792	3.728
AKAP1	6.07726	6.10865	6.42357	6.51917	6.45921	6.31849	6.52548	6.19905	6.56839	6.18714	6.57246	6.15944	6.26645	6.36238	6.82262	6.21192	6.22387	6.20968	6.41052	6.53048	6.28131	7.724	6.8285	7.3935	6.62025	7.507	7.0415	6.895	6.78192	7.14067	6.671
AKAP10	5.84833	5.828	5.94817	5.77583	5.61643	5.92195	5.74762	5.86433	5.68647	5.92534	6.02593	5.86738	5.98726	5.71553	5.64012	5.56937	5.82571	5.76472	5.65343	5.81667	5.62685	5.40917	5.6955	5.614	5.44523	5.49367	5.382	5.52463	5.6025	5.68054	5.882
AKAP11	6.27476	6.39965	6.63246	6.74655	6.56225	6.68778	6.64679	6.67708	6.56222	6.69508	6.70619	6.41476	6.69167	6.77714	6.62726	6.54201	6.61656	6.44138	6.61369	6.64333	6.57743	7.012	6.68467	6.67667	6.7285	6.717	6.57877	6.5789	6.58642	7.024	6.66763
AKAP12	5.6049	5.71028	5.78484	6.02722	5.92474	6.3275	5.67373	5.95294	6.02413	6.06916	5.89198	5.62881	5.88887	6.05238	6.1826	5.49893	5.83589	5.72603	5.9769	5.76716	5.93365	7.3555	7.35833	6.85833	7.39233	8.19133	7.0835	7.391	7.39283	7.47117	6.81467
AKAP13	7.76143	8.04103	8.1531	8.13143	8.21143	8.13143	7.98198	7.9402	8.02905	7.85484	8.04722	7.78913	8.09119	8.06171	8.17468	8.03571	8.12952	8.05095	8.21167	8.05397	8.1219	8.01608	8.20058	8.23417	7.929	8.65917	8.256	8.2225	8.32433	7.851	8.1815
AKAP14	3.72516	3.91976	3.79853	3.88556	3.75913	3.86205	3.86571	3.82857	3.80048	3.87535	3.78732	3.82714	3.54952	3.79563	3.77889	3.95929	3.78651	4.01151	4.00252	3.82183	4.22238	3.7515	3.6595	3.66617	3.843	3.85658	3.9025	3.705	3.7695	3.81433	3.8035
AKAP17A	3.9977	4.05504	3.89873	3.76143	3.90627	3.9081	4.16129	3.99392	3.95496	3.85409	3.81131	3.82183	3.9854	3.63262	3.90381	4.10018	3.84048	4.31952	3.83857	3.71952	3.79413	3.94	3.773	3.931	3.73567	4.022	3.86177	4.0365	4.00283	3.57575	3.973
AKAP2	5.12937	4.88653	4.86106	5.05159	4.94257	5.1229	4.98044	4.95008	5.24081	5.06062	5.06226	4.73274	4.95824	5.12679	5.16103	4.91349	4.84536	4.80458	5.11429	4.94087	4.99013	5.3525	5.63375	6.1275	5.04575	5.695	5.3625	5.31783	5.5755	5.941	5.326
AKAP3	3.98929	3.95143	3.97246	3.69476	3.72	3.98113	3.99427	3.52381	3.78595	3.73937	3.81131	4.01479	3.88548	3.99333	3.85167	3.98563	3.8031	3.91024	3.99252	3.69548	3.6719	3.741	3.773	3.64958	3.90352	3.6395	3.8125	3.8012	3.7575	3.826	3.6495
AKAP4	3.8024	3.8481	3.74806	3.95262	3.95024	4.00522	3.84397	4.00429	3.95024	4.09167	3.85984	4.01143	3.95143	3.88556	4.02238	4.11071	4.06533	3.84095	4.04738	3.89738	4.15952	3.86833	3.989	4.10375	4.0085	3.96829	3.96892	3.87817	4.155	4.183	3.938
AKAP5	3.88738	3.88925	4.04615	3.9921	3.95948	3.87833	4.0381	3.91048	4.04675	3.93929	3.92974	3.8327	3.90614	4.06738	4.04944	3.82748	3.81214	3.74548	3.87825	4.07079	3.86244	4.0375	3.967	4.5965	4.13072	4.0005	4.0365	4.0105	3.895	4.609	3.931
AKAP6	3.89817	3.99143	4.03548	3.97024	4.00504	4.00095	4.07762	4.10893	4.17944	3.76508	3.99214	4.04722	4.045	4.18865	4.09905	3.99492	4.06873	3.80857	4.03325	4.1	3.9173	4.012	4.1015	4.5325	4.0655	4.5879	4.2155	4.23583	4.10617	5.1665	4.16322
AKAP7	6.10948	5.8445	6.09504	6.08238	6.25776	5.96405	6.20637	6.11131	5.98793	6.06435	6.04879	6.18905	6.20006	6.06516	5.93837	6.30187	6.01317	5.79611	6.09379	6.20595	6.12357	6.34	5.8044	6.156	5.9535	5.695	6.0215	6.14467	5.75475	6.052	6.05422
AKAP8	6.92538	7.27613	7.33667	7.29988	7.305	7.03595	7.14595	7.37357	7.1231	7.32151	7.2406	7.17135	7.3223	7.18722	7.38071	7.21075	7.29895	7.32579	7.19952	7.23071	7.21556	7.30625	7.2185	7.6325	7.25183	7.58325	7.284	7.3585	7.2615	7.4645	7.5275
AKAP8L	6.57698	6.62786	6.66833	6.68628	6.61726	6.86159	6.59714	6.84119	6.70393	6.71276	6.8156	6.76024	6.5973	6.82548	6.89512	6.63198	6.77361	6.58773	6.61369	6.86262	6.71791	6.83183	7.05162	6.58617	6.73842	7.4025	6.826	6.815	7.072	7.195	6.8295
AKAP9	5.46758	5.51944	5.81536	5.77929	5.68984	5.6881	5.83083	5.92861	5.74377	5.77028	5.68948	5.73207	5.82619	5.82655	5.78849	5.78924	5.86722	5.5145	5.77242	5.71544	5.7558	6.07129	5.81803	5.74575	5.7635	5.86525	5.63817	5.68375	5.88867	5.85642	5.95625
AKIP1	6.26989	6.20048	6.43119	6.41292	6.50063	6.61528	6.45933	6.2826	6.36067	6.41208	6.56405	6.48785	6.42024	6.36238	6.49103	6.53056	6.53925	6.33413	6.59429	6.5669	6.2273	5.84942	6.164	6.23875	6.24353	6.1415	6.30363	6.393	6.0305	6.03	6.148
AKIRIN1	6.62992	6.74619	6.86849	6.88389	6.75976	6.77377	6.93678	6.89052	6.85389	6.93833	6.69008	6.86421	6.89135	6.84675	6.79397	6.86881	6.72706	6.81976	6.78863	6.68738	6.94766	6.53283	6.74933	6.83433	6.77883	7.08617	6.80142	6.7505	6.77375	6.58275	6.63283
AKIRIN2	6.9731	6.57579	6.75909	6.485	6.31682	6.46617	6.28567	6.64786	6.4619	6.70421	6.34849	6.38517	6.80619	6.51841	6.24778	6.42385	6.46126	6.64333	6.498	6.13997	6.54846	5.54533	6.1955	5.77246	6.29442	6.12817	6.0411	6.00642	6.183	5.37208	6.086
AKNA	4.49913	4.2802	4.43083	4.40147	4.44821	4.23976	4.44575	4.51627	4.30917	4.48877	4.32016	4.32016	4.49585	4.36409	4.37214	4.45859	4.41583	4.37083	4.2621	4.36095	4.55722	4.11275	4.54075	4.12425	4.27455	4.3895	4.041	4.23375	4.45225	4.11487	4.39825
AKNAD1	3.77	3.70286	3.86656	4.05998	3.85706	4.00095	3.80198	3.9554	3.70929	3.86529	3.99214	3.45476	3.77286	3.71841	3.92456	3.76238	3.95063	3.91024	3.75321	3.81214	3.78246	3.9135	3.80283	3.9935	3.941	3.8845	3.8435	4.17496	3.649	3.8755	4.04158
AKR1A1	7.10837	7.05258	7.59917	7.37333	7.50508	7.64472	7.87976	7.50429	7.51095	7.32976	7.76286	7.99163	7.34258	7.4781	7.30726	8.10786	7.73773	7.02321	7.49595	7.73218	7.65675	6.64983	6.9935	7.13042	7.021	6.52897	7.145	7.12725	6.89633	6.67033	7.18
AKR1B1	8.85869	7.88881	8.22	7.75393	8.25627	8.45655	8.73071	8.25738	7.99119	8.13869	8.51183	9.03357	8.335	8.0125	7.91845	8.75738	8.44607	7.89857	8.32925	8.42639	8.37429	7.012	7.898	7.1045	8.04292	6.99687	7.49725	8.2335	7.9785	7.03392	7.585
AKR1B10	4.09696	4.63397	3.89563	4.2591	3.7919	4.2069	3.91714	4.26167	4.25738	4.08762	3.78732	4.04016	4.13167	3.83325	3.84738	3.96381	4.35048	4.59456	4.04738	3.96155	4.09524	4.58433	3.952	4.34425	4.18741	3.932	4.378	4.3425	3.89925	4.256	3.9605
AKR1B15	3.98929	4.39833	4.02271	3.9921	4.00504	3.80545	3.95611	3.76829	3.92552	3.9081	4.12024	3.92837	3.81643	3.76143	3.76312	3.66452	3.93024	4.18659	3.93159	3.81214	4.29389	4.15571	4.1115	4.184	3.8735	3.87333	4.1835	4.352	3.84567	4.088	3.905
AKR1C1	4.78691	5.17649	5.88421	5.81552	4.91804	5.42468	5.39154	5.13409	5.69056	5.1346	5.04952	4.51952	5.18845	5.42559	5.16357	5.19522	5.57532	5.28214	5.36246	5.19286	4.95841	5.22242	5.6455	5.62375	5.81442	5.5775	5.86846	5.77367	5.6275	5.85883	5.51288
AKR1C2	6.70381	7.39123	7.28944	7.6323	6.75976	7.31405	7.14595	6.88389	7.63627	6.54754	6.80476	5.93577	6.99381	7.05512	6.57957	7.02548	7.74937	7.37	7.11508	7.18476	6.39393	6.91483	7.61775	7.6685	7.8415	7.8535	8.4095	7.7665	7.5745	8.251	7.2385
AKR1C3	7.4025	8.08659	7.77984	8.57599	7.61421	8.06976	7.85828	8.19317	8.22286	8.07917	7.83266	7.26476	8.15254	7.83913	7.9381	8.03571	8.54448	8.24964	8.0604	7.88321	7.99032	8.22925	8.44367	8.63113	8.32467	8.10575	8.5665	8.36975	8.431	8.89675	8.43125
AKR1C4	4.00291	4.0973	4.34833	4.51667	4.01563	4.34962	4.19024	4.35635	4.2776	4.17853	4.30423	4.13643	4.12881	4.17794	4.13183	4.33397	4.23591	4.2625	4.30772	4.2176	3.92703	3.95	4.461	4.623	4.44825	4.27433	4.545	4.36817	4.311	4.6315	4.20833
AKR1C6P	3.67905	3.81671	3.79262	3.51905	3.75913	3.80545	3.62929	3.86771	3.91363	3.76508	3.88016	3.62734	3.79016	3.69734	3.42976	3.28429	3.8031	3.73327	3.72181	3.69548	3.72643	3.79943	3.80283	3.63	3.982	3.78917	4.098	3.64217	3.80783	3.782	3.6785
AKR1C7P	4.85214	4.89095	5.24214	5.44452	5.08894	5.24841	5.07571	5.19873	5.46395	5.66306	4.97887	4.60929	5.20337	5.16569	4.86913	5.38766	5.63403	5.07651	5.14265	5.24171	4.93345	5.03388	5.28979	5.43233	5.45758	5.5275	6.29154	5.55142	5.42837	5.69923	5.30408
AKR1C8P	3.96714	3.63921	3.6719	4.04127	4.14369	4.02978	3.88726	4.06824	3.92552	4.17347	3.95988	3.89873	4.03413	3.665	3.974	4.15619	4.17893	3.95115	3.89952	3.87262	3.6469	3.711	3.9135	3.6995	3.794	3.738	3.74967	3.6705	3.8645	3.826	3.85533
AKR1D1	3.63762	3.69429	3.70315	3.71119	3.65405	3.67722	3.72722	3.7631	3.67627	3.79246	3.56893	3.67952	3.74571	3.84279	3.70701	3.6019	3.86562	3.67786	3.6696	3.70929	3.76143	3.63342	3.71888	3.76275	3.712	3.69983	3.6815	3.6465	3.73877	3.71783	3.6765
AKR1E2	4.09696	4.1704	4.21238	4.08905	3.9954	4.13265	4.07762	4.18774	3.98425	4.33992	4.07052	4.04722	4.09905	4.00262	4.13853	4.1319	4.16968	4.05935	4.28857	3.86119	4.07905	4.088	4.2407	4.33	4.0655	4.184	4.27767	4.17496	4.12733	4.4725	4.1305
AKR7A2	8.21155	7.91107	7.70214	7.83738	7.81976	7.79476	7.82016	7.83071	7.80825	7.78366	7.94913	8.03619	7.71466	7.85307	7.73032	7.98452	7.92821	7.89857	7.76016	7.91179	7.86034	7.6765	7.482	7.3585	7.752	7.6605	7.631	7.695	7.516	8.083	7.717
AKR7A2P1	5.55302	5.2419	5.14849	5.16746	5.45286	5.39909	5.32758	5.38135	5.39282	5.34468	5.51622	5.46181	5.2956	5.30361	5.43212	5.56937	5.44624	5.09194	5.28389	5.36984	5.33496	4.9299	5.09817	5.193	5.4533	5.335	5.4984	5.297	5.0315	5.37208	5.30408
AKR7A3	6.64615	6.44238	6.56802	6.6226	6.5879	6.60532	6.62476	6.59113	6.60345	6.51071	6.76728	6.71266	6.39754	6.565	6.53881	6.77155	6.73063	6.3953	6.4261	6.58929	6.69024	6.5385	6.255	6.222	6.62533	6.4765	6.4445	6.45608	6.35858	6.55692	6.54217
AKR7L	5.95302	5.82275	5.66774	5.76611	5.76158	5.76952	5.63801	5.75389	5.77262	5.61716	5.8001	5.75651	5.64198	5.6373	5.6071	5.76643	5.83083	5.84746	5.63428	5.71746	5.57976	5.58433	5.59317	5.68983	5.63958	5.695	5.634	5.6955	5.3745	5.9565	5.83358
AKT1	8.13238	7.64296	7.63893	7.48548	7.64165	7.59869	7.57829	7.62905	7.59952	7.43571	7.77369	7.82137	7.45913	7.51405	7.59151	7.83794	7.53226	7.62565	7.64008	7.74151	7.42476	7.191	7.59558	8.07925	7.51575	7.7175	7.811	7.526	7.40833	7.35875	7.585
AKT1S1	5.34181	5.39321	5.40127	5.41238	5.66325	5.31508	5.55087	5.23984	5.31115	5.56981	5.45937	5.3753	5.36242	5.29643	5.34147	5.54833	5.4699	5.33587	5.56774	5.43769	5.75776	5.0595	5.10283	5.225	5.4175	5.26033	5.40213	5.266	5.09983	4.90225	5.42667
AKT2	5.45581	5.70992	5.78317	5.82556	5.91359	5.82915	5.76293	5.77456	5.81413	5.84764	5.83864	5.86151	5.74228	5.88348	5.87734	5.90821	5.88683	5.51806	5.80602	5.91844	5.75329	5.931	6.0005	6.01992	5.86183	6.28567	6.00058	5.83221	5.91383	5.88067	5.90083
AKT3	5.92149	6.32362	6.64774	6.83274	6.60254	6.73889	6.6296	6.50127	6.69008	6.45595	6.5069	6.19452	6.40881	6.76728	6.78476	6.19095	6.49956	6.36333	6.79907	6.44776	6.71791	7.3565	7.03625	7.18025	6.9315	7.4025	7.37167	6.8955	7.0645	7.4645	7.01525
AKTIP	5.84114	5.71298	6.12111	6.30019	6.23044	6.14468	6.23077	6.03513	6.17167	6.02843	6.10472	5.84345	6.10048	6.28196	6.1773	5.89816	6.0669	5.7502	6.25873	6.19656	5.87683	6.70533	6.15903	6.84617	6.29967	6.47	6.63533	6.4925	6.06583	6.66408	6.16867
ALAD	6.4473	6.0028	6.127	6.00492	6.19095	6.16992	6.10937	5.76687	6.14532	5.81667	6.03694	5.79956	6.1169	6.13147	6.03177	5.70925	5.88175	6.05901	6.17675	5.97813	6.1321	6.08237	5.73942	6.357	5.92576	5.9595	6.239	6.19493	5.86183	5.9595	5.7335
ALAS1	6.70381	5.97222	6.19032	5.61111	6.33897	6.07865	6.21472	5.84313	5.97833	5.88464	6.23532	6.48785	4.91513	6.14063	6.13591	6.44363	5.81536	5.96435	6.01512	6.13028	6.11734	4.84775	5.756	5.18317	5.773	5.55467	5.83333	5.969	5.75475	5.44425	5.75433
ALAS2	6.10948	7.31349	4.58599	4.71792	5.0554	5.95286	4.89982	6.09881	6.0531	5.99389	4.45683	6.01048	5.90098	5.45667	4.90321	4.53179	4.98865	7.31571	5.21238	5.52901	5.4031	4.90985	4.735	4.4935	5.88067	4.807	4.7025	5.77961	4.99333	5.52508	4.35733
ALB	3.87667	3.74347	3.97246	3.97024	3.8881	3.76667	3.75381	3.89966	3.84283	3.66429	3.82103	3.88857	3.9854	3.99333	4.01254	3.70929	3.93024	3.76452	3.7631	4.00333	3.62976	3.931	5.53779	4.07467	3.75517	3.82	3.995	3.85977	5.68387	4.564	4.04158
ALCAM	7.4325	7.30302	8.42929	8.03571	7.96419	7.99833	8.09357	7.81095	7.95111	7.66532	7.7521	7.56151	8.1106	8.28595	7.89833	7.50524	7.56881	7.4606	8.3844	7.83762	7.91607	7.41625	7.77925	8.57933	7.96332	7.38583	8.503	8.19025	7.69175	7.73617	7.798
ALDH16A1	6.50746	6.46223	6.54754	6.20869	6.3869	6.37881	6.2394	6.57452	6.34889	6.33384	6.44706	6.76024	6.33945	6.17063	6.23836	6.55968	6.28159	6.30282	6.35	6.46119	6.16329	5.418	5.873	6.01617	5.98767	5.7325	5.7835	5.85788	5.88867	5.49517	6.148
ALDH18A1	6.54881	6.46223	6.56802	6.61079	6.36984	6.55599	6.37087	6.42024	6.54881	6.48016	6.39825	6.20968	6.31044	6.54698	6.42929	6.30187	6.37702	6.47115	6.65409	6.41438	6.53627	6.09233	6.6345	6.632	6.40858	6.40433	6.566	6.576	6.47	6.84333	6.234
ALDH1A1	7.09294	6.27484	6.51778	6.21208	6.65361	6.34889	6.94492	6.68341	6.28455	6.34889	6.48937	7.54381	6.63627	6.25762	6.04119	7.18794	6.79179	6.29271	6.09754	6.71276	6.44556	6.43952	6.52117	6.01617	6.8555	6.65567	6.56383	7.00833	6.56842	6.50217	6.05422
ALDH1A2	4.47258	5.04976	4.72845	5.3753	4.21722	4.83615	4.435	4.68048	4.81063	4.44357	5.07254	5.18056	4.65873	5.24837	4.99527	4.39976	4.76298	4.94905	4.31623	4.39976	4.51758	4.117	4.079	4.0555	4.24421	4.3195	4.078	4.5735	4.0355	4.62846	4.20467
ALDH1A3	5.85806	6.0028	5.09778	5.52206	5.80608	6.21429	5.56482	5.25757	6.03495	6.1519	5.13158	5.21206	5.70925	5.94569	5.34147	5.2956	5.58758	6.07014	5.0819	5.75651	5.60581	5.32	6.6265	6.0655	5.57275	5.74167	6.51117	5.44317	6.717	5.6035	6.02835
ALDH1B1	6.33698	6.03333	7.05429	7.25155	6.89183	6.68298	6.72706	6.3225	7.07631	6.54754	6.90048	5.69381	6.755	6.92738	7.21919	6.38663	6.21313	6.12183	7.26095	7.08619	6.74911	7.40092	7.62975	8.2	7.4925	8.24108	8.3665	7.6655	7.4955	8.023	7.359
ALDH1L1	5.03302	4.49127	4.98083	4.95597	4.85954	4.7823	4.5346	4.44357	4.78452	4.18409	4.77984	4.25302	4.35378	5.19497	4.85048	4.35988	4.63881	4.57103	5.02157	4.865	4.27149	7.30625	6.0835	7.0195	6.815	6.46008	7.47908	6.96667	5.95994	7.145	4.89983
ALDH1L2	5.08143	5.60994	5.6959	5.5447	5.63379	5.53667	5.51839	5.89296	5.66802	5.84764	5.30714	5.92504	5.8027	5.74877	5.55873	5.63964	5.62802	5.30675	5.56302	5.38143	5.61802	5.941	5.8235	5.41713	5.92576	6.053	6.12742	5.71892	5.75475	5.8235	5.95929
ALDH2	8.35286	7.45452	7.80024	7.54077	8.0504	7.86524	8.07702	7.74071	7.8631	7.59599	8.06067	8.24302	7.53357	7.6819	7.81095	8.13048	7.86121	7.63611	7.85075	8.09214	7.91607	8.26575	8.2415	8.12	7.7795	8.53712	8.12737	7.8265	8.25658	8.3675	7.56283
ALDH3A1	4.39825	4.13155	4.19786	4.08905	4.17976	4.2069	4.17401	4.16319	4.26659	4.19877	4.18667	4.15659	4.13843	4.0996	4.07513	4.47152	4.15952	4.35262	4.33062	4.18143	4.06841	4.09417	4.33	4.225	4.184	4.2155	4.15508	4.17183	4.189	4.2165	4.0805
ALDH3A2	7.18262	7.22929	7.4306	7.46417	7.42369	7.61405	7.62565	7.5196	7.67603	7.33704	7.43595	7.67976	7.59048	7.34524	7.18262	7.58817	7.60024	7.2831	7.34437	7.5621	7.29476	7.828	7.40067	7.27475	7.3445	7.4635	7.3785	7.2725	7.31637	7.77083	7.2385
ALDH3B1	5.50968	5.39731	5.57359	5.46889	5.65294	5.52347	5.71298	5.49516	5.64706	5.60437	5.79389	5.875	5.48968	5.33786	5.40771	5.97218	5.65595	5.40326	5.78484	5.61252	5.7025	5.364	5.11333	4.78817	5.26033	4.80242	5.0915	5.29233	5.23633	4.653	5.295
ALDH3B2	4.25192	4.06563	4.18091	4.22649	3.85706	4.14992	4.0381	4.0381	4.05815	3.89833	4.11024	4.25302	4.09905	4.16	4.08889	4.12052	4.04933	3.98262	4.09524	3.98373	4.00198	4.10833	4.129	4.0875	3.992	3.905	4.088	3.88713	4.07508	4.05954	3.941
ALDH4A1	5.89587	5.64675	5.91556	5.41806	5.65841	5.70913	5.73068	5.51937	5.99405	5.65344	5.57786	5.94646	5.73262	5.88284	5.4031	5.70393	5.75959	5.68357	5.3982	5.79381	5.50722	5.6125	5.432	5.941	5.48058	5.59292	5.77923	5.706	5.448	5.6935	5.2231
ALDH5A1	4.6481	4.7029	4.6681	4.73385	4.69304	4.51312	4.65548	4.47355	4.72869	4.50922	4.7316	4.49969	4.557	4.96024	4.71214	4.6273	4.66642	4.45595	4.6669	4.94981	4.76476	4.97267	4.5045	5.04213	4.58875	4.78621	4.675	4.756	4.3415	5.39092	4.70233
ALDH6A1	6.038	5.8445	6.26125	6.0171	5.86821	5.95286	6.04619	5.87587	5.93566	5.93887	6.00776	5.99738	6.06715	6.11373	6.08458	5.87809	6.03659	5.81556	6.09379	6.0736	6.04964	6.896	6.21367	6.01617	6.74808	6.44317	6.39349	6.51033	6.34967	6.9495	6.03633
ALDH7A1	5.46738	5.33341	5.4746	5.51774	5.39282	5.5577	5.22198	5.42071	5.25942	4.88567	5.51622	5.20563	5.44306	5.67302	5.46263	5.28137	5.42071	5.44373	5.54016	5.46956	5.26445	6.32967	5.64239	5.95804	5.66342	5.93013	5.70883	5.66372	5.70417	6.46733	5.43425
ALDH8A1	3.98929	4.21909	4.24198	4.1881	4.11393	4.09536	3.9078	4.37952	3.87317	4.18409	4.05968	4.19024	4.42286	4.14111	4.02238	4.07929	4.11048	4.33913	4.15788	4.04395	4.21034	4.23475	4.172	4.19458	3.992	4.1735	4.2575	4.04633	4.369	4.31042	4.318
ALDOA	10.0218	9.77905	9.68524	9.77643	9.74446	9.70339	9.79612	9.84269	9.87849	9.67894	9.83536	9.79286	9.85214	9.7104	9.7291	10.0441	9.9666	9.85032	9.8019	9.7	9.65595	8.92583	9.61875	9.417	8.9015	9.42062	9.111	8.97575	9.7215	9.20575	9.5375
ALDOAP2	3.74754	3.90976	3.86656	3.85603	3.98762	3.7569	4.31952	3.84792	3.90254	4.01151	3.89857	3.8327	3.69476	4.44421	3.8614	3.78365	3.9727	3.67786	3.87825	3.89095	3.84857	3.761	3.931	3.962	3.7735	3.895	3.771	3.741	3.922	4.0011	3.9645
ALDOB	3.8573	3.6881	3.88802	4.01088	3.54381	3.78443	3.83167	3.74119	3.83865	3.76956	3.76258	3.86976	3.82115	3.80654	3.74762	3.92672	3.91984	3.89952	3.86532	3.95641	3.86244	3.8335	3.90387	3.8195	3.6135	3.64342	3.7345	3.94471	3.898	4.03883	3.82917
ALDOC	5.97498	5.53349	5.61655	5.81552	5.87702	5.59219	5.84984	5.49905	5.71117	5.6075	5.84381	5.32581	5.41806	5.77631	5.81835	5.42175	5.65087	5.54579	5.96962	5.79381	5.62685	5.77829	6.1955	5.2635	5.81442	6.12817	6.014	5.77961	6.1755	5.9785	5.65925
ALG1	5.63881	5.58825	5.54405	5.66492	5.61643	5.409	5.48367	5.58	5.53403	5.61111	5.5531	5.6306	5.87825	5.40131	5.44714	5.36085	5.60246	5.58712	5.79833	5.55095	5.36806	5.203	5.3305	5.48117	5.15575	5.1495	5.38629	5.30875	5.13767	5.29367	5.326
ALG10B	4.57175	4.67475	4.78825	4.73385	4.70056	4.55774	4.79913	4.50071	4.42486	4.66802	4.525	4.56919	4.54762	4.82546	4.63433	4.76952	4.71358	4.71345	4.58359	4.62675	4.35107	4.282	4.22346	4.79329	4.58875	4.2055	4.4915	4.412	4.25367	4.369	4.4215
ALG11	6.89135	7.29476	7.58925	7.3846	7.32456	7.48419	7.34258	7.29607	7.40161	7.30329	7.27556	6.94619	7.59679	7.46	7.46635	7.02548	7.19028	7.10714	7.41194	7.00595	7.39476	7.65725	7.4145	7.6685	7.80229	7.18267	7.236	7.562	7.2615	6.826	7.073
ALG12	5.69806	5.46972	5.40127	5.23728	5.34591	5.2894	5.16433	5.3499	5.35389	5.17357	6.13196	5.49469	5.19306	5.18197	5.28214	5.55841	5.367	5.57444	5.35782	5.36984	5.42333	5.534	5.24267	5.51503	5.216	5.344	5.31987	5.1445	5.165	4.95	5.3935
ALG13	6.40632	6.54881	6.17833	6.66278	6.48	6.52847	6.58643	6.72552	6.47881	6.51071	6.44164	6.45929	6.49453	6.75202	6.57957	6.43	6.45543	6.41516	6.42127	6.4848	6.59333	6.617	6.6265	6.3055	6.459	6.5869	6.3595	6.318	6.7015	6.379	6.7347
ALG14	6.06452	6.09567	5.97135	6.19905	6.10238	6.19462	6.17754	5.99627	6.155	5.93887	6.06986	6.11196	6.21837	6.1619	6.11383	6.2271	6.01317	6.24643	6.31	6.11937	6.0173	6.1425	5.78517	6.702	6.144	5.70433	6.31619	6.1735	5.989	6.0835	6.086
ALG1L13P	3.9977	3.8576	3.76302	3.80385	3.93123	3.80545	3.79107	3.70368	3.61262	3.97119	3.75333	3.74303	3.69476	3.665	3.8081	3.68714	3.87921	3.74548	3.95143	3.81214	3.80397	3.741	3.673	3.984	3.6265	3.8	3.8325	3.7815	3.8265	3.752	3.835
ALG1L2	6.17976	5.97222	6.0646	5.96684	5.7846	5.78108	5.79784	5.76687	5.88452	5.8673	5.84381	6.04762	5.84282	5.99129	5.88776	5.98706	5.94611	5.92627	5.96962	5.73294	5.88236	5.90167	5.6125	5.60333	5.81442	5.364	5.8895	5.73051	5.82421	5.236	5.7665
ALG1L9P	5.97498	5.80732	5.99129	6.06361	5.92093	5.85337	5.95452	5.83521	5.96913	5.89609	5.99726	6.04762	5.83173	6.00167	6.07425	6.0484	5.94611	5.94476	6.01512	5.84984	5.86599	5.931	5.6765	5.8345	5.93433	5.59292	6.07125	5.98758	5.75475	5.408	5.872
ALG2	6.0469	5.90459	5.73492	5.62857	5.98239	5.7528	5.83179	5.82397	5.81671	5.83638	5.81016	5.81952	5.6746	5.83349	5.78849	5.97532	5.68786	5.79956	5.77294	5.82243	5.73607	5.27333	5.60592	5.81267	5.5765	5.4715	5.695	5.75067	5.54117	5.68567	5.5845
ALG3	7.94357	8.07143	7.86827	7.59246	7.6323	7.72905	7.6173	7.88929	7.69167	8.10139	7.51167	8.01714	7.81857	7.6156	7.35867	8.03571	7.92821	8.02429	7.80226	7.76262	7.69286	6.718	7.28233	7.6325	7.44317	6.99687	7.155	7.27583	7.2615	6.89775	7.42333
ALG5	7.93317	8.04103	8.12071	8.05706	8.24615	8.2244	8.08429	8.15944	8.15829	8.29528	8.14135	8.19119	7.91	8.00012	8.1319	8.24302	8.03421	8.18738	8.13468	8.20901	8.09167	8.24	7.944	8.349	8.0555	7.482	8.1595	8.144	7.99925	7.95767	8.2565
ALG6	6.20913	6.0028	6.09504	5.8556	6.16063	5.92195	6.17754	5.86433	5.87256	5.96449	6.05873	6.17934	5.89349	6.07448	5.94619	6.28119	6.09627	6.03226	5.81944	5.96913	6.1321	5.84942	5.557	5.5045	5.70317	5.418	5.764	5.9285	5.5475	5.7765	5.872
ALG8	7.73127	7.79722	7.66825	7.6323	7.69167	7.69611	7.64571	7.83913	7.5654	7.83563	7.69167	7.88857	7.52302	7.71746	7.75111	7.83794	7.77643	7.83071	7.60349	7.73218	7.74603	7.18	7.43067	7.3935	7.349	7.03212	7.22525	7.3585	7.416	7.1175	7.516
ALG9	5.06226	5.04024	4.81651	4.91491	5.10357	4.93984	5.12183	4.76849	5.04603	4.93303	4.93976	4.78274	4.78775	5.14849	4.84024	4.91349	4.97918	5.05235	4.97347	5.02075	4.87838	5.418	5.0025	5.48483	5.13083	5.324	5.0915	5.059	5.15396	5.6935	5.03613
ALK	5.67897	4.67475	4.83603	4.32048	3.76718	4.67641	5.75762	5.14448	3.98425	4.80906	4.33913	5.52699	5.04905	4.5225	3.96286	6.10516	5.26136	4.80458	4.30772	5.03048	4.71619	3.6615	4.12083	3.753	4.0765	3.56417	4.15508	4.401	4.1735	3.69038	3.895
ALKAL1	3.9977	3.75381	3.95159	3.84556	3.77556	3.72524	3.86571	3.84792	3.87317	3.96008	3.65272	3.8773	3.67024	3.91548	3.73124	3.62246	3.71952	3.65817	3.815	3.83159	3.81135	3.95	3.52975	4.129	3.95125	3.895	3.88117	3.678	3.709	3.659	3.941
ALKAL2	6.88071	5.4223	5.91022	4.86968	5.73536	6.28385	5.97591	6.0077	6.21147	5.40603	6.63887	7.10468	5.48143	5.31421	4.76833	6.89103	5.4973	5.3806	5.6044	5.75651	5.56119	6.52875	6.57823	6.66033	7.23575	6.2258	6.11667	7.20142	6.5025	6.25338	5.155
ALKBH1	5.24111	4.61008	4.48387	4.77762	4.9331	4.77135	4.79913	4.65734	4.73931	4.73131	4.90802	4.8239	4.8588	4.97011	4.76833	5.08127	4.86636	4.69304	4.9406	4.90167	4.57932	4.641	4.686	4.849	4.4905	4.4335	4.59292	4.37154	4.83817	4.8175	4.78025
ALKBH2	6.52214	6.98452	6.81976	6.78171	6.86163	6.7329	6.81103	6.95772	6.59024	6.75909	6.73136	6.77107	6.89798	6.86655	7.02175	6.84071	6.97353	6.93833	6.895	6.77361	6.77563	7.6765	7.0115	7.38367	7.00171	6.896	6.95429	6.95975	7.15475	6.983	7.263
ALKBH3	5.27004	5.09153	5.18438	5.24194	5.26187	5.42468	5.32157	5.29337	5.25325	5.26706	5.3431	5.44175	5.28556	5.24405	5.35971	5.5854	5.28976	5.00667	5.30968	5.44714	5.25452	5.40917	5.24267	5.77246	5.38837	5.12771	5.64692	5.57083	5.23675	5.53433	5.48
ALKBH3-AS1	3.76056	4.14111	3.87647	4.17791	3.9954	4.09536	4.29	3.9554	3.75659	4.03929	3.85984	4.09754	4.05621	3.90614	4.05913	3.82748	4.06873	4.03147	3.87825	3.85167	3.86976	3.94	3.9785	4.513	4.0875	4.108	4.1635	4.164	3.9315	3.9795	4.225
ALKBH4	5.70925	5.5723	5.22135	5.44452	5.63379	5.35032	5.72603	5.59849	5.54867	5.37583	5.68595	5.59437	5.64829	5.59794	5.56861	5.44581	5.1131	5.80565	5.64362	5.52901	5.4031	5.25871	5.26029	5.71433	5.27792	5.2015	5.382	5.20934	5.39511	4.908	5.507
ALKBH5	6.86685	6.5598	6.4931	6.58649	6.43583	6.50579	6.6181	6.42024	6.57444	6.36012	6.46972	6.46294	6.71218	6.5402	6.35107	6.41952	6.46921	6.5726	6.65409	6.36433	6.5646	6.2035	6.54953	6.41901	6.3125	6.92583	6.50425	6.32888	6.64167	6.2135	6.4055
ALKBH6	4.7625	4.59675	4.86106	4.81254	4.84921	5.01429	4.89048	4.7503	4.94971	4.97143	5.00952	5.03317	4.78775	4.97999	4.84024	5.15115	5.23952	4.69304	4.88048	5.02075	4.90071	4.87375	4.92117	5.21075	4.94437	4.861	4.80758	4.8075	4.99333	4.87067	4.547
ALKBH8	4.52529	4.63877	4.86591	4.91491	4.64871	4.75216	4.80302	4.71214	4.76002	4.63794	4.66702	4.60548	4.79113	4.6625	4.84024	4.58438	4.76298	4.58841	4.73079	4.47952	4.67449	4.9475	4.72467	5.00571	4.8945	4.715	4.6975	4.76633	4.63573	4.63692	4.76633
ALLC	3.81836	3.75381	3.7831	3.83476	3.81286	3.78443	3.74296	3.80273	3.84283	3.76508	3.74433	3.76738	3.83542	3.77115	3.79756	3.82748	3.70976	3.82984	3.84948	3.89095	3.6719	3.6815	3.89375	3.85775	3.941	3.8845	3.9745	3.961	4.056	3.803	3.79733
ALMS1	5.94524	6.04198	6.11582	6.07181	6.13048	6.10016	5.99778	5.94524	6.10492	5.96449	5.95755	5.99738	6.1052	6.12298	6.14702	6.05951	6.00377	6.16762	6.14905	6.08429	6.1321	6.63883	6.13767	6.576	6.1545	6.57877	6.49975	6.303	6.222	6.8155	6.01275
ALMS1P1	4.43274	4.75111	4.99964	4.48782	4.80236	4.84492	4.55324	4.57845	4.85433	4.60667	4.53476	4.56919	4.76673	4.83585	4.72111	4.68607	4.52877	4.60508	4.76425	4.61738	4.72569	5.00183	4.89242	5.1025	4.6665	5.08367	4.94475	4.86483	4.96512	5.13825	4.70233
ALOX12	3.7303	3.62833	3.77339	3.76143	3.78683	3.49333	3.65881	3.88931	3.77508	4.03071	3.32429	3.69254	3.95542	3.96317	3.72135	3.71952	3.48548	3.58095	3.65762	3.81214	3.53437	3.875	3.822	3.6195	3.823	3.83933	3.659	3.511	3.885	3.555	3.602
ALOX12-AS1	4.86733	4.9148	4.84889	4.58841	4.93	4.76778	4.92679	4.76849	4.97812	4.76641	4.95429	4.86214	4.84398	4.91413	4.88776	4.98927	4.9585	4.87639	4.69147	4.88603	4.8288	4.75717	4.53787	4.60967	4.6731	4.79	4.6515	4.714	4.616	4.8175	4.76633
ALOX12B	4.25192	3.97286	4.24198	4.3871	4.09167	4.37228	4.18448	4.15881	4.06833	4.18409	4.77984	4.29	4.28786	4.05738	4.31929	4.52278	4.05917	4.30952	4.24698	4.16302	4.17849	4.06417	4.3405	4.098	4.1535	4.184	4.27767	4.2685	4.262	4.236	4.452
ALOX12P2	3.89171	3.81131	3.89873	3.92599	3.95345	3.96663	3.9619	3.84131	3.88286	3.81762	3.7919	3.93369	3.97201	3.94036	3.88881	4.03373	3.93456	3.79365	3.91567	3.96964	3.97099	3.931	3.88867	3.87683	3.89775	3.93017	3.93992	3.88713	3.9605	3.95883	3.88242
ALOX15	4.21653	3.87865	3.88802	3.88556	3.91947	3.96714	3.95056	4.00008	4.01024	4.10905	4.05968	4.08464	3.9371	3.94865	4.05913	4.24815	4.06357	3.92438	3.97587	4.05746	4.11548	3.94	3.907	3.9785	3.917	3.911	3.917	4.00122	4.09575	4.02383	3.9975
ALOX15B	8.13238	6.42291	6.68401	4.90333	6.48286	6.4381	6.82087	6.71087	6.25016	5.77738	6.84698	7.78913	6.2906	6.40762	5.7981	7.58817	6.66767	6.35849	6.39609	6.58929	6.55786	4.96326	6.80325	4.38633	7.4165	5.17446	4.7975	7.3845	6.9425	4.61983	4.7975
ALOX5	6.73175	6.50235	6.48286	6.56225	6.69675	6.35008	6.66802	6.75238	6.38519	6.63446	6.63887	6.6623	6.59071	6.49984	6.52633	6.80913	6.55992	6.64829	6.69008	6.62476	6.69972	5.418	6.22417	5.18	6.04975	5.43451	5.60933	5.90623	6.23495	4.96067	6.603
ALOX5AP	7.42393	7.55002	7.10524	7.61492	7.08921	7.4353	7.15468	7.57	7.40161	7.57405	7.83266	6.71266	7.61619	6.87864	7.81095	7.4127	8.01214	7.7004	8.3754	7.23071	7.3781	5.22242	6.87267	5.54842	6.50867	5.5235	6.64158	6.51033	6.95325	5.3625	7.199
ALPG	6.61583	6.26778	6.04498	6.21881	5.97226	5.985	5.94443	6.14071	6.11582	6.21877	6.03694	6.37554	6.16746	5.71553	5.92195	6.23728	6.05329	6.38492	6.15676	6.13997	6.39393	6.2035	6.2045	6.28733	6.36888	6.31683	6.295	6.12587	6.16825	5.8235	5.81442
ALPI	4.17857	4.10024	3.84409	4.17791	4.21722	4.08683	3.83849	4.09869	4.0231	3.95024	3.86913	4.09754	4.03413	4.02929	4.1496	4.16611	4.36008	4.16659	4.08403	4.1	4.16645	4.291	4.0005	3.85775	4.12367	4.047	4.11642	4.11683	4.1465	4.2085	4.01351
ALPK1	8.68201	8.77738	8.75905	8.5881	8.63	8.57706	8.49857	8.77524	8.61651	8.70659	8.73579	8.78254	8.71012	8.59071	8.67873	8.64321	8.55516	8.79794	8.66976	8.72333	8.58893	7.999	8.23012	8.3785	8.31375	8.1795	8.01483	8.19833	8.1815	7.92	8.54004
ALPK2	4.95615	4.05504	4.18091	4.20696	3.94095	4.14119	3.92556	4.56833	3.94505	4.90206	4.03063	3.97171	4.43413	4.48486	4.39825	4.67692	4.23054	3.96272	4.49135	4.40854	4.35107	3.789	3.9405	3.4925	3.7085	3.81067	3.7395	3.65	3.61	3.711	3.671
ALPK3	7.15952	7.21226	7.77123	7.67425	7.6323	7.30302	7.64571	7.23476	7.71379	7.39008	7.53429	6.79325	7.46833	7.77524	7.79952	7.10714	7.42643	7.43333	7.80226	7.76262	7.42476	7.496	7.953	8.20625	7.40033	8.18717	7.7255	7.422	7.8815	8.023	7.898
ALPL	4.41516	4.49127	4.40746	4.11015	4.44254	4.68478	3.83849	4.30929	3.98425	4.54008	4.26016	4.28161	4.32693	4.54206	4.28929	4.17665	4.24087	4.49794	4.32786	4.54647	4.07905	4.0455	4.71477	4.35333	4.58875	4.25742	4.452	4.48983	4.8265	3.97025	4.547
ALPP	5.22048	5.1131	4.58599	4.97792	4.95597	4.83615	4.67421	4.97913	4.89802	4.85762	4.74103	5.13079	4.71437	4.70381	5.00325	5.08127	4.9585	5.1019	4.99367	4.83597	5.03048	4.97267	4.89242	4.9715	4.95175	5.04908	4.8815	4.797	4.98513	4.8495	4.77113
ALS2	4.57638	4.39475	4.60194	4.4955	4.48579	4.47146	4.64278	4.53707	4.55358	4.53513	4.53476	4.57592	4.51479	4.63611	4.50798	4.55438	4.57256	4.32881	4.41475	4.46958	4.37973	4.46047	4.4207	4.675	4.4832	4.4614	4.48343	4.4456	4.3924	4.5804	4.4996
ALS2CL	5.02356	4.93716	4.84889	5.05159	4.80236	4.97719	4.9106	4.97913	4.88071	4.86762	5.11188	4.94079	4.87472	5.02587	5.16103	5.00569	4.94071	4.86405	4.97347	4.94087	4.92899	5.19325	4.79	5.11333	5.112	5.2192	5.02437	5.0255	4.817	4.908	4.93
ALX1	3.94929	3.97286	3.88802	3.94063	4.09167	3.98113	4.05746	3.89966	3.78595	5.6496	3.93891	3.88857	3.86635	3.83325	3.72135	3.87817	3.85071	3.88127	3.51833	3.85167	3.90873	3.98383	3.773	3.907	4.0433	3.96829	3.82217	4.107	3.689	3.57575	4.11133
ALX3	4.20952	4.03171	4.01286	3.98163	3.94095	4.05762	4.17401	4.01681	4.16847	3.83357	4.00262	4.10833	4.07817	4.05738	4.13853	4.10018	4.07929	4.1754	4.42861	3.91971	3.93097	4.021	4.0005	4.0555	4.26979	3.96829	4.2895	4.138	4.21525	4.069	4.002
ALX4	3.93456	3.80188	3.7869	3.81893	3.82452	3.89833	3.85119	3.81381	3.96964	3.79246	4.05607	3.92238	3.86635	3.85	3.8027	3.78738	3.9619	4.09052	3.96119	3.99	3.63484	3.875	3.9635	3.992	3.917	3.8155	3.917	3.9565	3.8795	3.9645	3.771
ALYREF	7.20762	7.52905	7.50153	7.54833	7.47571	7.40167	7.48516	7.5246	7.59952	7.38056	7.43214	7.45095	7.45913	7.38631	7.46635	7.56619	7.36952	7.64774	7.43476	7.27024	7.25155	7.6395	7.45267	7.65517	7.241	7.4635	7.431	7.3585	7.4635	7.4455	7.1375
AMACR	4.59476	4.63397	4.80567	4.85048	4.55282	4.64024	4.85381	4.86214	4.77239	4.86353	4.8905	4.78024	4.86647	4.8396	4.90321	4.76952	4.65298	4.5821	4.69147	4.72075	4.59246	4.6475	4.655	4.59008	4.45542	4.3765	4.6215	4.67108	4.55887	4.352	4.63312
AMBN	3.94929	3.99143	3.99262	3.86712	3.77556	4.00095	4.11568	3.87817	4.0231	4.0697	4.04095	4.05849	3.62	4.02117	4.15868	3.96381	4.00194	4.07032	4.00252	3.93857	4.17849	3.9655	3.9405	3.60225	3.86375	3.86163	3.8017	4.00122	3.9745	3.886	3.602
AMBP	4.03722	4.10024	3.95159	4.01088	4.11393	4.15933	3.84845	4.07921	3.87317	3.85409	4.10119	3.8773	4.08849	4.00262	3.92456	3.86833	3.91024	3.91024	4.15788	4.00333	3.74988	3.711	3.9785	3.951	4.02267	3.905	3.74967	3.771	4.02267	4.05954	3.8755
AMBRA1	5.9305	5.71142	5.86994	5.79885	5.78924	5.81556	5.8169	5.89611	5.80849	5.77738	5.79585	5.84033	5.64198	5.91107	5.89869	5.77675	5.79611	5.8104	5.74228	5.81181	5.80062	5.83683	5.6765	5.84672	5.7955	5.81483	5.8426	5.7545	5.67317	5.7335	5.69775
AMD1	7.1144	7.31349	6.82548	7.4261	7.31944	7.27548	7.44881	7.45329	7.28738	7.35119	7.34325	7.41095	7.37738	7.215	7.37024	7.51095	7.22198	7.17988	7.10659	7.19587	7.31147	7.3365	7.368	7.71517	7.29025	7.7255	7.3085	7.294	7.3525	7.6325	7.0845
AMDHD1	4.77198	4.24149	5.11976	4.48782	5.4225	5.22258	5.76706	5.20197	4.90647	4.01151	5.06226	5.58643	5.0404	4.46532	4.72857	5.54833	5.04903	4.13286	4.27749	4.89079	4.30817	4.10833	4.43283	3.907	4.77212	4.108	4.1275	4.94779	4.4405	4.5804	4.235
AMDHD2	6.77381	6.49341	6.70381	6.57992	6.71409	6.62698	6.87179	6.78944	6.66375	6.63446	6.70619	7.1619	6.89798	6.59714	6.44868	6.92131	6.82855	6.55595	6.59933	6.70381	6.60603	6.09233	6.05875	5.75533	6.4135	5.78842	6.1554	6.37683	5.9955	5.60983	6.27041
AMELX	3.76056	3.69429	3.87647	3.72683	3.81286	3.80545	3.60103	3.87817	3.35095	3.59381	3.62107	3.8327	3.66075	3.69734	3.72135	3.96381	3.62857	3.71224	3.80494	3.84157	3.95738	3.6815	3.714	3.773	3.6385	3.78917	3.8325	3.82917	3.7575	3.886	3.72
AMELY	3.77875	3.59857	3.94157	3.74762	3.96833	3.77333	3.6719	3.96488	3.90254	3.84262	3.62107	3.79077	3.95542	3.84279	4.12881	3.61214	3.8031	3.65817	3.74349	4.25192	3.6202	3.82	3.773	3.61183	3.7845	4.022	3.792	3.8405	3.9315	3.803	3.73933
AMER1	4.50924	4.45748	4.44214	4.33889	4.48579	4.31869	4.44575	4.35635	4.44706	4.23563	4.29515	4.31616	4.43413	4.47952	4.51623	4.42548	4.31325	4.49143	4.62143	4.40854	4.63016	4.8175	4.564	4.85492	4.47125	4.90967	4.861	4.5635	4.5735	4.8175	4.4297
AMER3	3.70214	3.77357	3.95159	3.78242	4.185	3.7569	3.88726	3.86771	4.00368	3.75607	3.65272	3.70286	3.97536	3.90614	3.88317	3.89938	3.84048	4.02155	4.04238	3.57571	3.81976	3.656	3.8435	3.8245	3.7845	4.047	3.8125	3.7815	3.80783	3.6995	4.01351
AMFR	6.83619	6.98452	6.62476	6.47048	6.88544	7.0822	6.82548	6.67108	6.78437	6.9529	7.1619	6.98452	6.64183	6.75202	6.56472	6.91036	6.99119	6.98024	6.96619	6.80861	6.59933	6.51275	6.611	6.66033	6.454	6.884	6.79447	6.58575	6.63483	6.848	6.65079
AMH	4.45929	4.15167	4.35087	3.9921	4.02464	4.19738	3.9078	3.98619	4.00368	4.03929	4.24994	4.14071	4.13843	3.90614	4.11913	4.20693	4.08968	4.2625	4.01286	4.29083	3.9927	4.312	4.319	4.235	4.13072	4.022	4.0265	4.195	3.953	3.907	4.03313
AMHR2	3.81836	3.82776	3.73252	3.76143	3.94095	4.02978	3.82802	3.93238	3.70929	3.6719	3.89857	3.71563	3.69476	3.72893	3.87266	3.69516	3.6719	3.97333	3.815	3.83159	4.51758	3.894	3.673	3.6195	3.74467	3.82	4.056	3.99117	3.73877	3.679	3.85533
AMIGO1	4.6377	5.08012	5.43861	5.52206	5.69377	5.39015	5.6181	5.47008	5.26309	5.08278	5.53403	4.94952	5.48143	5.32516	5.49897	5.01589	5.34301	5.13468	5.43364	5.22722	4.86636	5.63312	5.50933	5.64608	5.74283	5.7325	5.8625	5.656	5.5101	5.3625	5.62737
AMIGO2	6.53992	6.38663	7.6501	6.59036	7.05952	7.1956	7.20786	6.51546	7.14071	7.2721	7.09095	6.70236	7.13214	7.10754	6.86869	6.5004	6.64806	6.30282	6.88252	7.08619	7.03798	8.0715	7.482	8.1465	7.71317	7.789	7.70175	7.756	7.40833	7.195	6.90625
AMMECR1	5.89052	6.31849	5.73492	5.98619	5.83905	5.85825	5.75363	6.18867	5.73944	5.81226	5.79129	5.87595	5.89349	5.64813	5.7556	5.867	5.86357	6.27213	5.91633	5.79381	5.725	5.76	5.557	5.8615	5.7635	5.46667	5.80013	5.7635	5.55092	5.44633	5.81442
AMN	5.93603	6.76183	6.70873	6.6226	6.31682	6.4256	6.43095	6.6569	6.65738	6.70421	6.37761	6.93615	6.47538	6.11373	6.43762	6.80913	6.51187	6.80669	6.64583	6.25726	6.89071	6.5477	6.771	6.24867	6.895	6.93167	6.607	6.6089	6.88679	6.369	6.148
AMN1	4.45929	4.34298	4.29071	4.36281	4.43317	4.35262	4.26063	4.21756	4.31373	4.27881	4.30933	4.32979	4.15919	4.49532	4.34937	4.38976	4.4002	4.1754	4.44143	4.35061	4.21034	4.37075	4.13873	4.71575	4.411	4.48992	4.511	4.51642	4.21525	5.1155	4.308
AMOT	4.08587	4.06923	4.22714	4.24234	4.25833	4.31929	4.35133	4.09183	4.02032	4.11656	4.21159	4.07952	4.15257	4.2589	4.21581	4.02929	4.14002	4.14002	4.12905	4.23289	4.02444	4.58875	4.23192	4.58033	4.44683	4.67117	4.49417	4.48983	4.14133	4.891	4.28817
AMOTL1	5.04246	5.67881	5.93095	6.5089	6.20377	6.10016	6.21472	6.16857	6.155	6.1519	5.93823	6.47635	5.97667	6.00167	6.31032	6.48952	6.44046	5.86798	6.2169	6.23758	7.00599	6.51275	6.3691	6.632	6.826	6.791	6.826	6.303	6.4135	6.47258	6.255
AMOTL2	7.5655	7.68794	8.39714	8.34083	8.21143	8.74327	8.10278	8.025	8.12333	8.30643	8.09012	7.96756	8.44381	8.60747	8.7074	7.65845	8.1204	7.64774	8.25524	8.23429	8.09167	8.01608	7.84242	8.1465	8.471	7.7175	8.5665	8.40883	7.7665	7.2861	8.00808
AMPD1	3.82381	4.10742	4.00286	3.64357	3.8881	3.85548	4.07762	3.92802	3.71401	4.71619	3.87619	3.99325	4.27237	3.68714	4.58206	4.05429	4.00823	4.01595	3.73218	4.21722	3.9395	3.741	4.155	3.6995	3.73567	3.63342	3.765	3.755	4.0525	3.70625	3.9605
AMPD2	6.82079	6.48857	6.3731	6.5089	6.44103	6.47595	6.49897	6.45109	6.4419	6.35369	6.48937	6.34056	6.22956	6.47302	6.60694	6.41476	6.40048	6.2634	6.39609	6.49595	6.55786	6.3855	6.846	6.1895	5.94278	6.52897	6.0215	6.08617	6.77065	5.98683	6.617
AMPD3	4.23238	4.15167	4.13119	4.46563	3.9954	4.16976	4.38972	4.28929	4.16847	4.28857	4.32016	4.38633	4.33722	4.21635	4.3881	4.54937	4.47878	4.3881	4.2372	4.15401	4.33976	4.62092	4.9475	4.2575	4.60933	4.5015	4.33	4.352	5.003	4.34967	4.35733
AMPH	3.92929	4.21127	4.08849	3.95002	4.17643	4.03889	3.86571	3.98619	4.35258	3.80397	3.99214	4.15008	4.02214	4.10405	4.05913	3.90952	3.76143	4.02155	4.12905	3.97476	4.29389	5.4405	4.984	6.08575	4.86225	5.4385	5.08092	4.8925	4.976	6.41317	4.60017
AMT	5.80062	5.828	6.42429	6.42817	6.20952	6.15448	6.35226	5.94524	6.22968	6.02482	6.18048	6.01557	6.18867	6.33625	6.48213	6.09948	6.38905	5.8904	6.13222	6.40004	6.23577	7.0455	6.461	5.9605	6.129	6.812	6.212	6.222	6.36142	6.545	6.50467
AMTN	3.89817	3.87865	3.90952	3.88881	4.07146	3.91786	3.92556	3.77905	5.13158	3.98063	3.82103	3.91786	3.81643	3.79087	4.02238	3.93119	3.75103	4.02155	3.92143	3.89095	3.85476	3.875	3.516	3.753	3.8845	3.95083	4.0165	3.89735	4.13658	3.6995	3.895
AMY1C	6.06006	6.09567	6.38405	6.37881	6.62869	6.32619	6.14321	6.5249	6.05698	6.51071	6.42143	6.30798	6.33945	6.41643	6.43762	6.34972	6.25933	5.93464	6.33357	6.47238	6.57111	6.71288	6.05375	5.70483	6.4915	6.423	6.18588	6.5511	6.00933	6.74225	6.59583
AMZ1	7.45044	6.96462	7.02363	7.11579	7.59405	7.88833	6.80381	7.17595	7.45464	7.36048	7.46595	7.67976	7.66714	7.19929	6.90933	7.91179	7.76143	6.89183	7.23964	7.36897	6.70393	6.67983	7.06383	6.59183	6.6285	7.098	6.46808	6.4855	7.0255	6.8785	7.062
AMZ2	7.74206	7.54077	7.73063	7.61492	7.75286	7.82937	7.69302	7.63984	7.74321	7.63893	7.77968	7.57524	7.46619	7.68595	7.65698	7.66528	7.60071	7.53008	7.79722	7.79437	7.74603	7.82867	7.7015	7.59725	7.56283	7.26817	7.46617	7.61833	7.68517	7.63267	7.67425
AMZ2P1	7.14437	6.83246	7.19508	6.88879	7.25143	7.165	7.05698	6.96405	6.93188	7.06571	7.09794	6.90302	6.68183	6.96952	6.88869	6.92131	7.01595	6.79377	7.19508	7.15256	7.03798	7.1955	6.94383	6.846	6.9535	6.6445	6.67058	7.0425	7.0205	7.10583	6.98092
ANAPC1	4.95079	5.20184	5.33371	5.25098	5.2258	5.22837	5.2976	5.41263	5.25791	5.37583	5.19638	5.29263	5.36876	5.2433	5.26535	5.31586	5.34939	5.18625	5.17194	5.17226	5.32668	5.27168	5.32762	5.2571	5.26029	5.32644	5.08579	5.21521	5.25612	5.35414	5.40864
ANAPC13	6.22881	5.97222	6.4881	6.49638	6.37786	6.59333	6.60532	6.18867	6.01468	6.44599	6.42659	6.47635	6.33945	6.18085	6.43762	6.3768	6.34481	6.0021	6.58302	6.11169	6.41373	6.617	6.29475	6.58617	6.617	6.19775	6.541	6.5555	6.368	6.8525	6.46717
ANAPC15	6.6274	6.32841	6.05286	5.97667	6.16063	6.19462	6.18852	6.09881	6.18042	5.95286	6.3275	6.25565	6.20833	6.1619	6.03177	6.19656	6.25413	6.44138	6.31	6.2463	6.30516	6.41492	6.128	6.632	6.106	6.116	6.4775	6.0505	6.2135	6.30958	5.882
ANAPC16	5.35829	5.63992	5.57359	5.78484	5.81548	5.72651	5.77778	5.64821	5.40326	5.6398	5.82621	5.69381	5.65782	5.69468	5.84889	5.62881	5.73706	5.57444	5.67366	5.9154	5.8419	6.223	5.844	5.85542	5.81442	5.83208	5.6445	5.94867	5.8805	6.30183	5.64967
ANAPC1P1	4.00845	3.94071	4.43613	4.14748	3.97786	4.27982	4.25071	4.24405	4.229	4.24016	4.23881	4.56919	3.8273	4.30151	4.1496	4.20693	4.04933	4.25208	4.29843	4.18143	4.52881	4.30177	4.20167	4.29	4.1635	4.11717	4.15508	4.138	4.225	4.369	4.318
ANAPC2	4.6377	4.25071	4.57592	4.36281	4.46476	4.47694	4.52264	4.32	4.49999	4.33	4.60333	4.53806	4.36203	4.35101	4.39825	4.61615	4.67544	4.53817	4.50216	4.57702	4.65052	4.2645	4.319	4.47233	4.25333	4.4425	4.5583	4.4315	4.41862	4.28283	4.4715
ANAPC4	7.36913	7.43389	7.50153	7.33079	7.61421	7.58179	7.64571	7.67806	7.58857	7.50758	7.53429	7.5819	7.49548	7.51405	7.5625	7.57619	7.58897	7.34889	7.52766	7.63843	7.5369	7.5605	7.422	7.57137	7.377	7.11883	7.236	7.306	7.389	7.4955	7.5745
ANAPC5	8.82448	9.01388	8.79381	8.80952	8.75905	8.75175	8.78825	8.80484	8.73464	8.29528	8.68411	8.76917	8.84438	8.91952	8.75972	8.66383	8.85214	9.03274	8.84505	8.7854	8.88333	8.876	8.676	8.93	8.6335	8.635	8.705	8.594	8.76883	8.91133	8.9865
ANAPC7	5.20127	5.14328	5.46139	5.34423	5.56629	5.46897	5.65841	5.49079	5.58643	5.48079	5.60238	5.79956	5.235	5.4973	5.50865	5.85673	5.58758	5.29897	5.45655	5.64778	5.57271	5.4285	5.203	5.57637	5.2345	5.364	5.55042	5.50683	5.28	5.68054	5.5175
ANG	7.39381	7.22929	7.19508	7.4519	7.48476	7.33274	7.43702	6.85292	7.40161	7.04821	7.30988	7.19845	7.31262	7.20365	7.24881	6.92131	7.31786	7.29734	7.53369	7.2154	7.22879	7.25737	7.54704	7.2215	7.40933	7.6225	7.60125	7.3585	7.5455	7.851	7.31975
ANGEL1	6.0469	5.63992	5.51909	5.22837	5.60651	5.54611	5.73683	5.43222	5.40326	5.5206	5.56357	5.7806	5.41806	5.64813	5.62929	5.75044	5.68199	5.60206	5.35782	5.45476	5.525	4.67533	5.10783	4.81299	5.01033	4.8175	4.7135	5.0145	5.28	4.82933	5.176
ANGEL2	5.5844	5.81683	5.95548	6.01202	5.98239	5.83992	5.85437	5.97373	5.75601	5.85355	5.8973	5.661	5.73262	5.81738	5.89258	5.82421	5.86357	5.79611	5.92673	5.8356	5.87809	6.00779	5.60592	5.83958	5.773	5.91188	5.825	5.9605	5.59258	6.02475	6.06025
ANGPT1	6.12014	6.67381	6.97234	7.28246	6.86163	7.41175	6.58643	6.85292	6.82929	7.04821	6.9232	6.0659	7.52302	7.6919	7.26143	6.10516	6.87615	6.60952	6.88252	7.27024	6.55786	8.3345	6.87267	7.074	7.536	7.6115	7.35025	7.6585	6.803	8.1295	6.89629
ANGPT2	6.71276	7.59952	6.65792	7.34536	6.91056	7.02571	7.10968	7.40262	7.53071	6.86667	6.34849	6.95524	6.39754	7.19587	6.83738	6.35964	7.35262	7.57405	6.52762	7.04238	7.2721	7.145	7.09683	5.793	6.4805	6.99687	6.52983	6.463	7.2055	7.32775	7.41383
ANGPT4	3.95847	4.37133	4.14099	4.8006	4.1221	4.24929	4.05746	4.63786	4.35258	4.74302	3.98036	4.29	4.29857	4.18079	4.50071	4.37087	4.18865	4.83361	4.69819	4.16302	4.90071	4.56629	4.1015	4.10813	4.60933	4.35208	5.10213	4.7245	4.53483	4.266	4.32796
ANGPTL1	4.29905	4.60563	4.65119	4.70603	4.63445	4.59627	4.30173	4.36738	4.71214	4.98841	4.64202	4.23548	4.31833	4.24413	4.85563	4.10735	4.39467	4.40262	4.60532	4.75532	4.35683	6.14923	5.432	6.31333	5.66937	6.10117	6.0655	5.8135	5.3005	6.29567	5.17375
ANGPTL2	6.61583	7.99063	6.84266	7.64036	7.20692	7.3227	7.26095	7.25202	7.20329	6.46923	6.80476	7.07341	6.94508	7.09905	7.24881	6.86286	7.40004	7.93317	7.3804	7.00595	6.80369	6.2455	7.28233	7.06358	6.44925	7.368	7.05179	6.37042	7.43592	6.67967	7.8415
ANGPTL3	3.7303	3.74347	3.82381	3.69476	3.45429	3.72524	3.71151	3.75897	3.62393	3.6279	3.4356	3.81252	3.90614	3.8969	3.72135	3.75143	3.52452	3.63643	3.96119	3.65317	3.6469	3.711	3.7935	3.73225	3.518	3.6475	3.49025	3.71069	3.78733	3.752	3.86592
ANGPTL4	8.32925	8.54448	7.4231	8.39012	8.06667	8.1852	7.94472	8.09286	8.51873	8.22786	7.97095	7.4731	8.02377	7.92442	7.31738	6.89976	7.42643	8.59494	8.16417	7.31389	7.69286	7.976	9.84262	8.45625	8.68988	9.3775	7.284	8.495	9.91449	8.89675	8.3895
ANGPTL5	4.03722	3.82776	3.9623	4.3871	4.06325	4.33099	3.69048	4.1679	3.89119	4.21202	3.77298	4.00397	4.27897	3.64601	3.92456	3.89938	4.29905	3.93929	4.51387	3.93857	3.88714	5.048	4.319	5.07075	5.03746	4.72533	5.576	5.39567	4.4405	4.73142	4.6395
ANGPTL6	4.82246	4.53219	4.43613	4.61603	5.0554	4.37228	4.79913	4.51161	4.47494	4.54008	4.2699	4.56919	4.3821	4.64694	4.42576	4.58008	4.18865	4.44544	4.53373	4.23289	4.61905	4.15571	4.1935	4.2045	4.0875	4.31055	4.33	4.2575	4.28033	4.148	4.266
ANGPTL7	4.25192	4.21909	4.03548	5.71618	4.52333	3.58135	4.15079	4.0381	3.95496	4.03071	4.01143	3.88857	3.94603	4.17085	3.91397	3.64381	3.8031	4.03147	5.45655	3.98373	3.77381	5.50021	4.92942	5.193	6.32608	5.071	6.596	6.77217	4.787	6.59517	5.06455
ANGPTL8	3.84863	4.00095	4.02271	3.9921	3.96833	3.76667	3.96472	3.85825	3.83369	3.91786	3.83071	3.88857	3.89558	3.87619	3.71119	3.76238	3.64817	3.85075	4.03325	3.90968	4.33976	4.1285	4.068	4.29	4.4905	4.0005	5.10213	4.4515	3.84567	4.4725	3.992
ANHX	3.64964	3.8056	3.75405	3.53262	3.76718	3.96119	3.55238	3.67214	3.5571	3.73937	3.85984	3.88857	3.6277	3.72893	3.53381	3.75143	3.63702	3.76452	3.72181	3.64298	3.89952	3.875	3.822	3.5925	3.556	3.594	3.5665	3.612	3.555	3.865	3.699
ANK1	4.56548	4.4546	4.47952	4.3423	4.50377	4.5396	4.41242	4.33976	4.59587	4.32473	4.39921	4.40474	4.14901	4.47548	4.46575	4.48317	4.28857	4.54605	4.26753	4.30161	4.64655	5.0225	4.42225	5.1445	4.2035	5.08883	4.545	4.28867	4.4915	4.9904	4.4819
ANK2	4.35071	4.1704	4.0191	4.32703	4.28679	4.20119	4.18881	4.23875	4.229	4.16157	4.01595	4.25302	4.26008	4.03262	4.1445	4.28413	4.50917	4.08571	4.28226	3.97221	4.22902	4.732	4.67608	4.652	4.46133	5.07833	4.78263	4.5015	4.75033	4.97203	4.75658
ANK3	4.43519	4.63457	4.96243	4.77221	4.95029	5.11687	5.05871	4.94093	5.25917	4.92773	4.88485	4.51008	5.06041	5.36067	5.13343	4.50462	5.05523	4.65818	5.0354	4.9379	4.89418	4.6376	5.3922	4.95	4.9299	5.3674	4.75105	4.85767	5.36285	4.83577	4.99304
ANKAR	5.29679	5.15268	5.5501	5.36389	5.58595	5.13214	5.26417	5.21214	5.2731	5.29337	5.28651	5.0819	5.36242	5.55062	5.4031	5.00569	5.32058	5.3806	5.23349	5.35222	5.33496	6.461	5.131	5.364	5.3175	5.615	5.31987	5.46667	5.18208	5.969	5.45233
ANKDD1A	4.44724	4.36206	4.68353	4.72647	4.56833	4.50162	4.83754	4.77288	4.72262	4.61952	4.57571	4.54357	4.58496	4.73456	4.7631	4.74595	4.73379	4.44183	4.73427	4.73794	4.47494	5.295	5.08333	5.16	4.95775	5.4263	4.86892	4.978	5.0775	5.22092	5.00933
ANKDD1B	3.8422	3.98492	3.78833	3.77437	3.82071	3.6873	3.96868	3.73095	3.89841	3.89016	3.85571	4.04016	3.78563	3.77562	3.81366	3.78829	4.04627	3.76032	3.76946	3.80698	3.82229	3.83333	3.754	3.742	3.69133	3.83017	3.7395	3.82333	3.85883	3.865	3.821
ANKEF1	4.06048	4.17984	4.0675	4.03586	4.0583	3.97405	3.98246	4.0746	4.09838	4.18897	4.01143	3.88323	4.16841	4.02929	4.10405	4.10018	4.25611	4.10063	3.83857	4.1354	4.03047	3.9355	4.02408	3.89375	3.91954	3.782	3.8435	4.0175	3.8585	3.77233	4.16683
ANKFN1	3.8681	3.77357	3.76302	4.00179	3.90627	3.4706	3.81921	3.64246	4.00368	3.6719	3.67224	3.69254	3.86635	3.95413	3.6879	3.82748	3.76143	3.9298	3.85815	3.81214	3.75706	3.85767	3.773	3.804	3.90352	3.81067	3.8725	3.90798	3.7695	3.8755	3.6405
ANKFY1	5.0984	5.43757	5.26651	5.3221	5.25183	5.23167	5.32758	5.43222	5.32036	5.31586	5.19151	5.31833	5.3493	5.1119	5.16966	5.35548	5.28452	5.28214	5.29444	5.29105	5.4031	5.40917	5.08867	5.14796	5.24577	5.16731	5.22277	5.25988	5.27667	5.28	5.204
ANKH	5.93603	6.43937	6.13222	6.36762	5.98738	6.27952	5.92651	6.26405	6.0106	5.98706	6.03274	5.66836	6.21202	6.03631	6.21659	5.90492	6.03659	6.42409	6.3768	6.02238	5.86932	6.08592	6.02542	6.4745	5.804	6.671	6.1875	5.95233	6.13211	6.76017	6.72187
ANKHD1	5.97498	5.96667	5.99818	6.1268	6.00192	5.8877	6.00349	6.17538	6.05698	6.1474	6.05873	6.1551	5.82619	6.00722	6.10865	6.15754	6.09179	5.89595	5.9769	6.10865	6.11734	6.255	6.73142	6.824	6.20863	6.906	6.5544	6.15025	6.70633	6.54953	6.26108
ANKHD1-EIF4EBP3	7.33685	6.96462	6.9156	6.57992	6.84984	6.83099	6.87833	6.76444	6.70393	6.74016	6.98476	7.11381	6.91627	6.81448	6.66254	6.91036	7.04333	7.04016	6.92341	6.91548	6.92952	6.23575	6.6705	6.39383	6.62533	6.57877	6.836	6.702	6.70633	6.44283	6.72917
ANKIB1	5.52508	5.20726	5.25079	5.1377	5.38431	5.36754	5.2019	5.04024	5.19224	5.95286	5.29738	5.06342	5.13921	5.18197	5.33095	5.31304	5.1446	5.12337	5.28389	5.36984	5.24776	5.24783	4.88345	5.6335	5.18	5.09372	5.432	5.34475	4.908	5.57675	5.1945
ANKK1	4.08587	4.13155	4.42532	4.49971	4.4177	4.32187	4.22484	4.22762	4.38254	4.1954	4.19861	4.19024	4.33722	4.29	4.34937	3.94143	4.36008	4.27091	4.22841	4.19159	4.06841	4.184	4.079	3.8245	4.37046	4.25742	3.9745	4.2155	4.11554	4.4935	3.922
ANKLE1	3.79833	3.70286	3.87647	3.93079	3.84835	3.86889	3.77238	3.77905	3.95496	3.71883	3.77298	3.86671	3.81643	3.70963	4.08889	3.95238	3.76143	3.74548	3.78476	3.82183	3.84857	3.511	3.832	3.804	3.5705	3.584	3.8725	3.71069	3.885	3.835	3.95175
ANKLE2	5.71908	5.1131	5.42984	5.39302	5.55583	5.39909	5.42294	5.57683	5.53929	5.23119	5.37861	5.29576	5.37186	5.50778	5.4225	5.65063	5.34301	5.37095	5.70361	5.38143	5.21694	5.11217	5.17467	5.66633	5.06417	5.23675	5.44433	5.0882	5.1195	5.46167	5.40467
ANKMY1	5.48079	5.94619	5.28607	5.96115	5.68786	5.76405	5.77317	5.85786	5.55543	5.68079	5.57666	6.13905	5.82294	5.55554	5.7556	5.80496	5.86722	5.92313	5.67366	5.71083	5.85355	5.69733	5.46067	5.25267	5.61083	5.57042	5.658	5.54	5.5755	5.2885	5.61867
ANKMY2	5.30575	5.3473	5.32135	5.30079	5.43246	5.22258	5.30405	5.3499	5.37357	5.28325	5.27889	5.47165	5.27637	5.30361	5.24181	5.41263	5.23952	5.32581	5.41238	5.41294	5.15432	5.26683	5.05883	5.51503	5.33592	5.1925	5.3525	5.156	4.96512	5.81359	5.297
ANKRA2	6.00389	5.70694	5.67302	5.83512	5.8519	5.81556	5.84984	5.63785	5.87256	5.7575	5.84381	5.65377	5.78379	6.01325	5.92195	5.63964	5.89466	5.83667	5.92276	5.9154	5.9054	6.2035	5.6765	5.9382	5.8915	5.695	5.94937	5.94	5.714	6.274	5.99142
ANKRD1	4.22042	4.12095	5.14849	5.03452	4.08079	5.39015	4.62397	4.66814	4.46532	4.85762	4.60333	4.43448	4.83932	4.6669	4.64488	4.46556	4.40881	3.89952	4.74294	5.27381	4.46425	3.7005	4.068	4.03578	4.676	3.86163	4.41367	4.58263	4.28033	3.6705	3.992
ANKRD10	6.86187	6.58548	6.96238	6.9169	6.87063	6.89976	6.75774	6.77563	6.72262	6.73028	6.82786	6.42327	6.53765	6.99778	6.94968	6.91036	6.83307	6.75585	6.93222	6.95405	6.82183	6.78283	6.4125	6.997	6.50867	6.72033	6.75025	6.7125	6.2425	7.349	7.166
ANKRD10-IT1	5.68869	5.67881	6.26125	6.30929	5.98239	5.92195	5.89071	6.25468	5.95671	6.29722	5.72417	5.85841	5.95492	5.85833	5.96579	6.0484	6.127	5.59171	6.105	5.88032	5.92768	6.075	5.8235	5.72267	6.0355	6.36862	5.634	5.847	5.74467	5.65483	6.4945
ANKRD11	6.47179	6.54881	6.55036	6.66433	6.71321	6.39615	6.32372	6.75782	6.70779	6.71276	6.5486	6.34823	6.73821	6.45429	6.36012	6.12881	6.3095	6.75585	6.6821	6.43413	6.55286	6.33565	6.6345	6.58875	6.65108	6.87175	6.32875	6.44861	6.4445	6.265	6.66675
ANKRD12	5.49699	5.72001	5.19563	5.82556	5.91359	5.68103	5.52206	5.75508	5.80004	5.7277	5.87938	5.76117	5.83173	5.67698	5.73536	5.74846	5.5252	5.81181	5.81468	5.81667	5.77687	5.90167	5.69367	6.1815	5.88583	5.91683	5.65052	5.86267	5.82421	6.00033	5.65925
ANKRD13A	6.50317	6.52841	6.66433	6.80381	6.4924	6.51683	6.68333	6.60992	6.59714	6.68438	6.51841	6.38917	6.74952	6.48793	6.54548	6.32619	6.50746	6.6721	6.61804	6.41438	6.69508	6.763	6.84925	6.616	6.5225	7.09217	6.58817	6.50567	6.763	7.0951	6.59642
ANKRD13B	4.83159	4.9148	4.76286	4.98086	4.70056	4.68016	4.63185	4.68649	4.6377	4.73595	4.5398	4.7169	4.61556	4.58323	4.7631	4.87231	4.76691	4.9594	4.94544	4.61329	4.85297	4.7065	4.6941	4.675	4.78913	4.8175	4.99304	4.8075	4.83817	4.7235	4.614
ANKRD13C	4.29	4.45748	4.29964	4.44397	4.27857	4.39066	4.29881	4.26667	4.3053	4.37	4.45683	4.47822	4.50086	4.45528	4.33889	4.41951	4.43055	4.44544	4.39738	4.39976	4.44061	4.54554	4.3795	4.71575	4.28967	4.3195	4.35142	4.5015	4.2345	4.666	4.32796
ANKRD13D	8.02429	8.53238	8.1106	8.01512	7.97452	8.03722	7.83976	8.15944	7.90976	8.08333	8.03722	8.00921	8.04786	7.9731	7.97917	8.06	8.07095	8.44135	8.01286	8.01857	8.13286	7.2265	7.6886	7.30665	7.733	7.49275	7.61208	7.756	7.6145	7.0725	8.01667
ANKRD16	6.18897	6.42291	6.46937	6.5089	6.06476	6.41438	6.56714	6.42024	6.43206	6.38138	6.39825	6.44581	6.61595	6.5754	6.64833	6.54201	6.56929	6.47115	6.35734	6.52659	6.43095	6.82425	6.30363	6.702	6.47	6.781	6.65183	6.60317	6.31983	6.4525	6.62667
ANKRD17	6.37465	6.66529	6.73933	6.9169	6.83929	6.7329	6.70593	6.72552	6.66802	6.8046	6.75817	6.79325	6.83635	6.86655	6.80819	6.81976	6.7123	6.6226	6.80381	6.86972	6.75774	7.0325	6.65183	7.13042	6.815	6.85883	6.93667	6.95233	6.75883	6.77908	6.761
ANKRD18A	4.0669	3.79478	3.90952	3.94063	3.95948	3.85929	4.07762	4.04738	4.09838	3.91786	3.83071	4.14071	3.89558	3.96317	3.8614	3.76238	3.9619	3.87206	4.04238	4.0619	3.85476	3.6045	3.854	3.8465	4.2035	3.7175	3.628	3.99117	3.942	4.03883	3.79733
ANKRD18B	3.77875	3.95143	3.81405	3.88881	3.95948	4.2069	3.79107	3.89966	3.78595	3.75607	3.59845	4.03667	3.53444	4.04702	3.85167	3.94143	3.91984	3.78694	4.0524	3.80206	3.9927	3.875	3.714	3.68	3.794	3.97938	3.771	3.82033	3.885	4.03883	3.671
ANKRD18CP	3.87262	3.97702	4.3556	3.99635	4.15397	4.20119	3.92984	4.10361	4.09167	4.02167	3.99956	4.06873	4.01652	4.09524	4.05361	3.93857	3.87526	3.96913	4.09052	4.08683	4.13087	3.99033	4.097	4.07833	3.9725	4.05158	4.06275	4.0265	3.97025	4.29	4.09742
ANKRD18DP	4.32008	5.91964	3.83438	6.38389	5.22048	5.33913	4.85877	5.30736	4.57071	5.1346	4.42706	4.44357	5.44306	4.49532	5.20056	4.51183	4.37963	5.94476	6.01512	4.18143	5.02187	4.778	4.23192	4.90933	5.55117	4.5305	6.66033	5.19783	4.516	3.95	5.2135
ANKRD19P	3.82444	3.92381	3.80702	3.76595	3.90627	3.76317	3.82802	3.84792	3.87781	3.75607	3.7304	3.75913	3.88937	3.88556	3.72881	3.73738	3.68841	3.6954	3.71651	3.8273	3.6748	3.84333	3.899	3.87333	3.89758	3.72933	3.79671	3.82033	3.72233	3.78817	3.75392
ANKRD2	4.25192	5.17226	4.21238	4.2994	4.43317	4.39849	4.25071	4.26667	4.6377	4.54008	4.20746	4.10833	4.59374	4.13119	4.43317	4.26905	4.41939	4.62632	4.81222	4.43069	4.57932	4.62092	4.516	4.71575	4.96067	4.45667	4.98767	5.0145	4.4305	4.666	4.37542
ANKRD20A1	4.14841	4.27288	4.5001	4.34996	4.54635	4.39567	4.20853	4.24833	4.19615	4.25401	4.28369	4.34661	4.20923	4.12686	4.22649	4.36357	4.05605	4.29665	4.27012	4.20778	4.44742	4.21237	4.2407	4.07833	4.29333	4.21225	4.1635	4.29158	4.27617	4.0455	4.10636
ANKRD20A11P	4.67708	4.42343	4.9606	4.78089	4.84228	4.8283	4.29665	4.68742	4.47859	4.65816	4.69724	4.66594	4.47494	4.74738	4.61196	4.6925	4.49567	4.45972	4.52837	4.58337	4.76877	4.8175	4.72875	4.43075	4.8815	4.58275	4.83325	4.87846	4.70346	4.59363	4.864
ANKRD20A19P	3.79357	3.70762	3.94635	3.93079	4.04738	3.8206	3.9078	3.89558	3.91363	3.86881	3.89857	3.9651	3.7631	3.84279	3.90901	3.92672	3.89353	4.07032	4.04238	3.70929	3.98262	3.94	3.9935	3.8195	4.0805	3.94467	4.041	3.84517	3.9585	3.761	3.931
ANKRD20A2	4.49971	4.54808	4.93296	4.54089	4.96954	4.80202	4.41639	4.62533	4.48651	4.44772	4.40414	4.62645	4.29374	4.51813	4.52179	4.56937	4.22649	4.36203	4.61376	4.47859	4.78118	4.80077	4.76546	4.4676	4.77807	4.60107	4.44807	4.57739	4.649	4.58614	4.76579
ANKRD20A4	4.04103	3.86246	4.11782	3.88881	3.9731	4.02978	3.85944	4.03329	3.83952	3.88714	3.94865	4.03667	3.95944	3.76143	3.85167	4.00802	3.91984	3.86648	3.82183	3.84157	3.97135	3.998	4.098	4.019	3.992	3.941	3.866	4.0105	4.012	3.9535	4.25475
ANKRD20A5P	5.21647	5.28907	5.66204	5.30968	5.57532	5.5223	4.83754	5.46063	5.23434	5.41532	5.18183	5.36731	5.12887	5.07266	5.24181	5.2874	5.1131	5.34734	5.10929	5.1777	5.40934	5.68217	5.3735	5.29179	5.508	5.23337	5.26483	5.39567	5.41	4.976	5.3005
ANKRD20A8P	4.43654	4.75556	4.86106	4.46873	4.34159	4.91198	4.22817	4.76849	4.32873	4.65352	4.28529	4.69938	4.62925	4.92335	4.51726	4.22143	4.74139	4.78042	4.53762	4.53984	4.51758	4.28917	4.20167	4.2045	4.28417	4.18933	4.28033	4.23133	4.19917	4.3145	4.48667
ANKRD20A9P	4.08968	3.76813	4.20867	3.91458	4.0777	4.08177	3.85167	4.0506	3.94984	4.07841	3.96425	3.95448	3.95036	4.16683	3.96877	3.93714	4.01595	3.91714	3.95143	4.04893	4.00688	3.95733	3.994	4.01875	4.08942	3.96225	4.094	4.121	3.85025	3.89375	4.13713
ANKRD22	4.6377	4.28619	4.29071	4.2373	4.15397	4.51312	4.50075	4.52242	4.03548	4.83722	4.41762	4.24167	4.37214	4.54206	4.72111	4.01913	4.03175	4.15786	4.20869	4.35061	4.76476	3.789	3.754	3.9935	3.95125	3.628	3.8125	4.0265	3.72	3.752	3.9645
ANKRD23	4.37659	4.31471	4.67843	4.26946	4.23563	4.22238	4.41242	4.26167	4.18532	4.24016	4.24994	4.29665	4.48988	4.29881	4.2304	4.34206	4.30563	4.27648	4.31	4.26668	4.34558	4.34797	4.39417	4.28319	4.30342	4.4205	4.35142	4.22033	4.4225	4.31267	4.36627
ANKRD24	4.35071	4.34298	4.09921	4.12935	4.1322	3.93992	4.02841	4.08865	4.07781	3.99214	4.08213	4.09754	3.9854	4.1129	4.11913	4.14405	4.08968	4.21571	4.04238	4.00333	3.80397	4.44142	4.172	4.0655	4.28967	3.95083	4.056	4.0365	4.13658	3.9915	4.0805
ANKRD26	4.47258	4.28118	4.60591	4.49325	4.46476	4.50162	4.50587	4.55151	4.46865	4.61675	4.4419	4.39833	4.45601	4.47054	4.37841	4.37581	4.44492	4.35488	4.40746	4.43863	4.43448	4.44367	4.3025	4.263	4.31683	4.4305	4.372	4.31683	4.3634	4.4515	4.3415
ANKRD26P1	3.92929	4.07909	4.05029	4.08905	3.86373	4.01405	4.1302	3.97105	3.9306	3.95532	3.89381	4.0205	3.90952	4.00262	3.8027	4.01286	4.06873	3.88127	3.91522	4.09716	3.97135	3.9135	3.9935	3.931	3.823	3.963	3.9745	3.8055	4.09054	4.148	3.826
ANKRD26P3	4.14841	4.54253	4.28238	4.14748	4.37806	4.62929	4.54381	4.33976	4.36281	4.10127	4.33913	4.79198	4.03413	4.38796	4.45127	4.39976	4.35048	4.46571	4.41766	3.83159	4.30817	4.1945	4.26	4.4515	4.53092	4.839	4.755	4.48	4.07508	4.3895	4.235
ANKRD27	5.46063	5.39595	5.46964	5.41607	5.48575	5.48891	5.44071	5.51571	5.40008	5.4654	5.46937	5.52699	5.25972	5.43641	5.34147	5.53044	5.45992	5.35831	5.38412	5.51877	5.53006	5.029	5.32417	5.42204	5.13479	5.289	5.489	5.2545	5.26783	5.264	5.2625
ANKRD28	6.00389	6.30802	6.11582	6.08238	5.92093	6.28385	6.04619	6.29343	6.03495	6.10837	5.94786	5.88966	6.25937	6.04611	6.00109	6.27011	6.29143	6.24643	6.05802	5.96913	6.05913	5.9785	6.3405	5.91	5.87133	6.15025	5.77388	5.88583	6.393	6.4045	6.1275
ANKRD29	6.32619	5.50833	5.91022	5.48266	5.76607	6.06724	6.05667	5.82397	5.70301	5.81667	6.18639	6.44581	5.90098	5.51792	5.58742	5.867	5.87305	5.24653	5.78881	5.89258	5.6674	5.84942	5.40845	5.08104	5.9535	5.74167	5.3525	6.09567	5.3745	5.56667	6.1165
ANKRD30A	3.84381	3.89475	3.85056	3.86712	3.83905	3.77746	4.08852	3.82002	3.78246	3.78925	3.87651	3.96468	3.92238	4.20306	3.97861	4.12052	3.82071	3.79413	3.85274	3.87262	3.63532	4.01517	3.89817	4.40217	3.89367	3.87333	3.86583	3.82917	3.8645	3.80967	3.78717
ANKRD30B	3.84381	3.86487	3.74749	3.75464	3.73159	3.6777	3.76143	3.79052	3.72187	3.70929	3.85504	3.67611	3.88937	3.78651	3.77167	3.78063	3.67627	3.65183	3.7154	3.65317	3.79871	3.72867	3.76617	3.8245	3.71261	3.77	3.76483	3.80617	3.70317	3.85933	3.79267
ANKRD30BL	5.49127	4.93716	4.81651	4.49971	4.77257	4.5396	4.59762	4.82476	4.80119	4.68873	4.79012	5.18056	4.62925	4.39833	4.17708	4.81857	4.37083	4.92746	4.45823	4.84466	4.21034	4.07142	4.60346	4.35333	4.46133	4.5565	4.31042	4.524	4.28033	4.4205	4.36627
ANKRD30BP2	3.93379	3.89881	3.77835	3.81933	3.83338	3.77213	3.89033	3.82918	3.795	4.21952	3.73838	3.84898	3.87995	3.83741	3.94843	3.78941	3.79816	3.81895	3.80494	3.86676	3.73932	3.8138	3.8506	3.89323	3.9308	3.8769	3.7969	3.8351	3.8774	3.7315	3.7926
ANKRD30BP3	3.8681	3.7129	3.63417	3.87769	4.02464	3.64817	3.55764	4.15881	4.17944	3.85409	4.07052	3.63702	4.01286	3.6748	3.974	3.87817	3.76143	4.09052	4.1881	4.08044	3.81976	3.894	3.875	3.962	3.922	4.108	3.8325	3.7815	3.4335	3.752	3.941
ANKRD31	3.76444	3.75914	3.77339	3.83008	3.8081	3.77333	3.73506	3.86379	3.74613	3.58278	3.75706	3.755	3.87123	3.85905	3.8577	3.73563	3.70976	3.83587	3.75671	3.89952	3.80614	4.10383	3.89867	4.0005	3.81817	3.73075	3.82217	3.85029	3.951	3.89233	3.728
ANKRD33	5.63881	5.87763	4.7558	5.52206	5.22048	5.30984	5.25481	5.58712	5.34175	5.45278	5.15202	5.54631	5.44306	5.08757	5.54786	5.6604	5.42504	6.02167	5.50619	5.45476	5.60581	5.1425	5.38633	5.42783	5.57275	5.59292	5.72443	5.39567	5.61696	5.3025	5.05375
ANKRD33B	4.37587	4.29056	4.45841	4.49254	4.41392	4.6246	4.46516	4.52698	4.47494	4.48877	4.82718	4.35859	4.39825	4.5121	4.44184	4.28929	4.41381	4.29063	4.49635	4.56746	4.74948	4.641	4.55517	4.38633	4.41367	4.7995	4.3145	4.5635	4.58933	4.66117	4.4819
ANKRD34A	3.97786	3.6619	3.9623	3.89881	4.08079	4.00095	4.16129	3.87817	3.89119	3.79246	3.90881	3.88857	3.94603	3.9434	3.95347	4.01913	3.88905	3.98262	3.96119	4.03444	4.19881	3.931	4.0105	4.54454	4.12367	4.129	3.932	4.04633	3.942	4.7235	4.01351
ANKRD34B	3.63	3.90976	3.7131	3.85603	3.91363	3.61905	3.6719	3.72524	3.72685	3.96008	3.71351	3.76738	3.6277	3.6748	3.85167	3.63333	3.62857	3.73327	3.60369	3.67611	3.62976	3.733	3.74425	3.8135	3.72	3.6985	3.547	3.729	3.689	3.57575	3.845
ANKRD34C	3.7303	3.95143	3.76302	3.58643	3.77556	3.82762	3.9078	3.68612	3.68881	3.86529	4.13024	3.77889	3.81643	3.81214	3.81924	3.8892	3.87921	3.63643	3.86833	3.79069	3.84054	3.6045	3.754	3.753	3.76475	3.7175	3.8125	3.87817	3.78733	3.679	3.85533
ANKRD34C-AS1	3.70214	3.8481	3.66294	3.70552	4.06325	3.7569	4.11568	3.58738	3.81405	3.7831	3.81131	3.74303	3.83542	3.91548	3.72135	3.77369	3.71952	3.91024	3.71119	3.70929	3.81976	3.761	3.931	3.87683	3.72658	3.738	3.8725	3.8405	3.73877	3.95	3.85533
ANKRD35	7.13226	7.84667	7.84774	8.64395	7.97452	7.66679	7.93571	7.98119	8.17833	7.82476	7.99833	6.96405	8.1106	8.00012	8.21655	7.20306	7.80423	7.94214	8.11611	7.38357	7.22879	8.813	8.17925	8.714	8.64883	8.48675	8.53875	8.56225	8.14425	8.759	8.267
ANKRD36	5.655	6.06476	6.26125	6.29403	6.12529	6.21983	6.38679	6.52901	6.22643	6.25762	6.18048	5.98296	6.38179	6.31127	6.4419	6.18357	6.11762	6.00548	6.26278	6.05488	6.23917	7.00683	6.3215	6.35975	6.6135	6.87175	6.20675	6.469	6.25425	6.48858	6.60575
ANKRD36B	5.83532	6.65571	7.03381	6.985	6.67661	6.64737	6.66802	7.1319	6.77573	6.88389	6.68476	6.71266	7.04529	6.8046	6.80042	6.71508	6.95379	6.78897	6.88252	6.64825	6.85008	7.2744	6.7005	6.30042	6.773	7.19125	6.34342	6.7125	6.68	6.8885	7.263
ANKRD36BP1	5.7769	5.50833	4.98968	5.015	5.46259	5.18254	5.02127	4.82476	5.17202	5.02502	5.37861	5.11198	5.07032	5.17107	5.19048	5.1722	4.99749	5.30675	5.0419	5.29721	5.20651	4.941	4.84	6.0655	5.193	5.2015	5.6545	5.43333	4.807	4.96067	4.78933
ANKRD36BP2	4.70349	5.0719	5.23831	5.03988	4.91575	4.93984	5.40538	5.16351	5.05107	5.51806	4.95611	4.95658	5.3194	5.03159	5.34734	5.16552	5.11985	5.02825	4.9373	5.08811	5.34767	5.1355	5.00478	4.76017	5.006	5.05258	4.73675	4.874	5.08475	5.18317	5.18092
ANKRD36C	6.21357	6.65063	7.09794	6.96282	6.69675	6.8823	6.88869	7.15905	6.83444	7.02885	6.68044	6.64825	7.06857	6.96462	6.89048	6.77706	6.86468	6.60952	6.9	6.59472	6.99849	7.2615	6.85925	6.41901	6.99483	6.97583	6.62533	6.94733	6.86067	6.88508	7.20383
ANKRD37	7.13976	6.70274	7.13238	7.03865	7.22845	6.94083	7.33048	6.92538	7.00595	6.59714	7.02075	6.55671	6.65746	6.84675	6.55948	6.78151	7.28198	6.6721	7.05214	6.87895	6.81333	6.804	7.54704	6.702	5.96762	7.888	6.566	6.00642	7.4635	7.32775	7.2385
ANKRD39	6.79337	7.02222	6.81976	6.92766	7.02675	7.04529	6.96587	7.0677	6.95579	7.08262	6.94444	7.05341	6.99381	6.97381	7.05968	6.93143	6.9219	6.87864	6.9123	6.95405	6.99405	7.084	6.80325	7.1995	6.962	6.65567	6.98467	6.987	6.70633	6.983	6.953
ANKRD40	7.41242	7.28452	7.57583	7.51333	7.6323	7.44464	7.5196	7.33845	7.53071	7.22992	7.51167	7.37508	7.54333	7.41214	7.5819	7.45488	7.44008	7.4606	7.57381	7.45667	7.18698	7.41625	7.383	7.80033	7.305	7.63267	7.6499	7.41417	7.236	7.27867	7.18
ANKRD40CL	3.84196	3.78014	3.89475	3.84956	3.7329	3.7989	3.82481	3.83635	3.82452	3.77733	3.90881	3.84038	3.79016	3.84937	3.81433	3.88494	3.80743	3.79855	3.84462	3.84676	3.7692	3.81278	3.81627	3.8732	3.7784	3.7094	3.8273	3.82917	3.87885	3.85425	3.7711
ANKRD42	6.18897	6.18651	6.44138	6.37738	6.26405	6.50087	6.42381	6.3603	6.42817	6.41554	6.35317	6.27492	6.26505	6.39802	6.42381	6.34972	6.26976	6.17206	6.3454	6.33893	6.3119	6.73	6.46817	6.46283	6.41936	6.51275	6.48133	6.4365	6.39721	6.67967	6.4015
ANKRD44	4.94952	4.85986	5.2331	4.9879	5.07824	4.86929	4.94375	5.09175	4.97175	4.94722	4.97244	5.0976	4.99833	5.04032	5.01393	4.92163	5.03587	4.81873	4.9406	5.01635	5.244	4.61633	5.08333	4.68867	4.878	4.79978	4.755	4.9595	5.05067	4.735	4.9595
ANKRD45	9.51292	9.91262	9.93095	9.69143	9.52147	9.60863	9.45214	9.8573	9.71595	9.8697	9.6931	9.66827	9.59683	9.61048	9.815	9.46857	9.57238	9.82521	9.76852	9.7621	9.82328	9.6015	9.35408	9.50284	9.326	9.6475	9.2755	9.349	9.21975	9.16267	9.708
ANKRD46	4.58984	4.72845	4.55992	4.71271	4.66913	4.61563	4.78089	4.49127	4.66268	4.42288	4.72714	4.48325	4.61889	4.88079	4.6548	4.7302	4.72969	4.66274	4.6604	4.73079	4.81857	5.12908	4.60346	5.0505	4.66275	4.89	4.82533	4.7615	4.636	5.3845	4.7055
ANKRD49	6.82079	6.82321	6.77611	6.71815	6.90048	6.7246	6.90726	6.75238	6.78437	6.8325	6.90048	6.80329	6.755	6.82548	6.80819	6.74151	6.72258	6.70742	6.77107	6.96841	6.85958	7.2485	6.48325	6.9508	6.74808	6.50988	6.7405	6.7505	6.35858	6.826	6.671
ANKRD50	4.61913	4.6625	4.83603	4.86968	5.00452	4.79113	4.78979	4.50071	4.98786	4.81847	4.65167	4.65935	4.80539	5.03735	4.92167	4.48317	4.69496	4.62632	4.71878	4.89079	4.7344	4.7365	4.758	5.4375	4.77212	4.75983	4.95478	4.797	4.797	5.45142	4.62933
ANKRD52	7.79722	7.97033	7.70214	7.83738	8.06667	7.94712	8.04722	7.99206	7.96214	7.86633	7.84456	7.94093	8.1219	8.0706	7.9381	7.99375	7.96079	8.26167	8.01286	7.97452	8.03317	7.84842	7.422	7.72083	7.68433	7.74696	7.53892	7.73333	7.516	7.476	7.94275
ANKRD53	4.26167	4.25968	3.93119	4.19758	4.16571	4.2069	3.85548	4.15881	4.14897	4.09167	4.05968	4.15981	3.64548	3.9434	4.12881	4.20693	4.05917	4.29063	4.1475	4.24421	4.00198	5.32	4.0005	4.29	4.0655	4.31055	4.226	4.155	4.1945	4.38025	4.195
ANKRD54	5.06586	4.79151	4.7029	4.60929	4.7558	4.9307	4.62397	4.66814	4.72262	4.67347	4.75452	4.72714	4.68813	4.7531	4.68048	4.87231	4.66192	4.71345	4.70583	4.6821	4.68956	4.62092	4.48233	4.76817	4.51067	4.53767	4.776	4.5735	4.5306	4.609	4.55092
ANKRD55	3.77875	3.87865	3.93119	3.87769	3.56381	3.92806	4.0381	3.72524	3.56762	3.96008	4.01143	3.86671	3.8273	3.86532	3.974	3.75143	3.93959	3.97333	3.82714	3.78087	4.08968	3.98383	3.8435	3.554	3.794	3.726	3.628	3.931	3.80783	3.761	3.518
ANKRD6	4.70804	4.57462	4.73627	4.91491	5.13224	5.02333	5.15468	4.64708	5.25325	4.92163	5.00952	4.56919	5.06041	5.33452	4.95637	4.60333	4.84536	4.57103	5.05523	4.88229	4.66884	5.64494	5.048	5.762	4.97867	5.773	5.60383	5.22067	5.111	6.33925	5.00058
ANKRD60	3.78905	3.89881	3.88802	3.82381	3.78683	3.81607	3.77238	3.81381	3.75659	3.72825	3.62107	3.74303	3.86635	3.9434	3.8081	3.79447	3.51571	3.96272	3.71119	3.69548	4.27149	3.80983	3.70683	3.7205	3.76475	3.82	3.8725	3.88713	3.837	4.0985	3.905
ANKRD61	3.89817	3.73238	3.93119	3.6727	3.83905	3.80545	3.89714	3.93238	3.73897	3.7831	3.88881	3.80319	3.97536	3.79087	3.91397	3.76238	3.9619	3.79855	3.84948	3.74012	3.6023	3.7005	3.673	3.8465	3.8845	3.81067	3.9645	4.0365	3.79567	3.826	3.982
ANKRD62	3.79369	3.69781	3.67786	3.83012	3.74754	3.81341	3.80198	3.75321	3.78595	3.80964	3.83609	3.66079	3.75107	3.80746	3.79756	3.80179	3.79725	3.80352	3.72181	3.755	3.71607	3.89925	3.74025	3.773	3.7085	3.835	3.70458	3.87475	3.7725	3.711	3.782
ANKRD62P1-PARP4P3	3.83857	3.77875	3.73932	3.80968	3.7164	3.74643	3.82802	3.80867	3.86394	3.72825	3.90268	3.94254	3.70075	3.86532	3.7419	3.67167	3.90694	3.75359	3.83143	3.79563	3.93599	3.8325	3.6985	4.0405	3.7395	3.823	3.786	3.5945	3.83195	3.69717	3.705
ANKRD63	4.58984	4.36206	4.03548	4.1881	4.2976	4.23976	4.15079	4.38893	4.40238	4.17347	4.24994	4.91198	4.43413	4.10405	4.48063	4.40976	4.30921	4.25208	4.41766	4.17336	4.38496	4.30177	4.26	4.3205	4.26979	4.41325	4.191	4.18475	4.12733	4.24558	4.1535
ANKRD65	4.03722	4.58468	4.18091	4.31024	4.17643	4.12454	4.07762	4.33976	3.97419	4.38921	4.12024	3.99325	4.15919	4.56183	4.34937	4.21809	4.26667	4.69304	4.22841	3.72968	4.53976	4.652	4.3895	4.24629	4.41979	4.547	4.7975	4.51033	4.27017	4.51517	4.8395
ANKRD7	3.95847	3.78381	3.74425	3.94063	3.71119	3.86889	3.81921	3.83635	3.67952	3.79246	3.95988	3.96024	3.67024	3.88556	4.05913	3.96381	4.09976	3.81895	3.86833	3.87262	3.85476	3.94	3.875	4.0455	3.699	4.01092	4.0165	3.921	3.90467	4.148	3.72
ANKRD9	8.19845	7.37119	7.36714	7.22992	7.17937	7.31405	7.39155	7.5246	7.30754	7.30329	7.36175	7.36262	7.38556	7.33845	7.20016	7.40556	7.40004	7.44421	7.50758	7.43262	7.15071	6.82425	7.816	6.717	6.88175	7.9095	7.021	6.934	7.8045	7.30783	7.4325
ANKS1A	6.24567	6.00746	6.10524	5.93421	5.92958	5.99313	5.90246	5.95205	6.07421	6.02482	6.01651	5.97548	6.02119	5.95456	6.09103	5.92306	5.83589	6.0654	6.21107	6.11524	6.04619	6.4775	5.7665	6.357	6.106	6.0675	6.424	6.10992	5.92	6.186	5.83625
ANKS1B	3.98345	4.09754	4.0071	4.05998	4.1322	3.98113	4.13944	3.95048	4.08044	3.93254	4.02345	4.02079	4.07177	3.96742	4.10361	4.16127	4.01238	3.9298	3.99881	4.04395	3.8752	4.81101	4.32233	4.84017	4.27617	4.8784	4.49417	4.33658	4.291	4.97683	4.33067
ANKS3	7.03155	7.52905	7.56619	7.79248	7.59016	7.57381	7.6173	7.8481	7.57524	7.65647	7.5469	7.45095	7.76016	7.6919	7.78643	7.45488	7.68202	7.50778	7.74952	7.62833	7.5369	7.96332	7.78883	7.8905	7.7015	7.917	7.56242	7.51575	7.6491	7.798	7.94275
ANKS4B	3.53119	3.68365	3.6719	3.53262	3.70246	3.83857	3.58952	3.46714	3.90254	3.71883	3.88016	3.97171	3.44357	3.64601	3.56762	3.86833	3.85071	3.39409	3.79505	3.50667	3.82702	3.82	3.6155	3.8245	3.5705	3.6685	3.72	3.565	3.7695	3.752	3.42
ANKS6	6.19873	6.74151	6.65792	6.99627	6.68754	6.80042	6.84032	6.94802	6.96724	7.0604	6.83905	6.62675	6.96405	6.92738	7.0906	6.54201	6.85421	6.83095	6.98413	6.89679	6.78643	7.64833	7.08467	7.4025	7.20017	7.43583	7.325	7.16575	7.0875	7.504	7.31
ANKUB1	3.9081	3.65	3.80397	3.90993	3.74754	3.79516	3.92556	3.77905	3.77508	3.65452	3.73246	3.69254	3.87619	3.82212	3.59857	3.75143	3.78252	3.93929	3.75321	3.58905	3.6719	3.511	3.725	3.76275	3.5705	3.6985	3.8125	3.689	3.546	3.792	3.659
ANKZF1	5.37968	5.25098	5.49127	5.57937	5.61643	5.53667	5.57552	5.58712	5.49675	5.49169	5.56357	5.64345	5.55087	5.47829	5.62929	5.53929	5.75659	5.25905	5.3227	5.5869	5.4973	5.3935	5.74675	4.9715	5.14967	5.505	5.156	5.17725	5.734	5.264	5.74417
ANLN	4.72857	4.71437	4.61548	4.55558	4.58512	4.56833	4.69147	4.73087	4.75021	4.2294	4.64202	4.55917	4.58496	4.55302	4.4073	4.67692	4.49984	4.59456	4.34606	4.52355	4.36138	4.255	4.1831	4.119	4.184	4.16342	4.43417	4.225	4.1735	3.9915	4.29725
ANO1	5.37389	5.29345	5.52524	5.57277	5.97667	5.68381	5.71735	5.49389	5.80746	4.85762	5.54754	5.21206	5.6433	5.92921	5.98683	5.25228	5.60423	5.29381	5.72512	5.92135	5.71813	6.32967	6.08714	6.42475	6.091	6.991	6.391	6.15025	6.0855	7.16	6.255
ANO10	7.38202	7.30302	7.25087	7.2629	7.34726	7.18937	7.3144	7.20163	7.4231	7.25155	7.21762	7.45571	7.20762	7.16456	7.14163	7.32159	7.18444	7.33008	7.08601	7.26667	7.15778	6.9297	7.28233	7.54807	7.2285	7.27242	7.3845	7.1155	7.29455	7.23975	7.0845
ANO2	4.33512	4.46358	4.53687	4.57131	4.48579	5.06676	4.66627	4.36556	4.52762	4.46028	4.40877	4.37952	4.78246	4.34098	4.48063	4.46556	4.32964	4.45079	4.19369	4.51016	4.76476	4.657	4.752	4.4825	5.0915	4.67017	4.80758	5.1345	4.8705	4.48	4.7055
ANO3	3.92929	3.90976	3.94157	3.69476	4.07146	4.13265	4.16129	3.94464	3.74613	3.70929	3.88881	4.20909	3.96466	3.69734	3.89381	3.94143	3.98167	3.67786	3.88918	3.83159	4.05907	3.6255	3.9785	3.951	4.13072	3.82	3.9025	4.17496	4.0655	3.8755	4.03313
ANO4	3.9081	3.62833	3.90952	3.83476	3.8881	3.78443	3.9078	3.46714	3.56762	3.62056	3.54571	3.70286	3.95542	3.925	3.76312	3.80488	3.55881	3.75359	3.815	3.92857	3.7419	3.58325	3.673	3.533	3.74467	3.6985	3.82217	3.565	3.7485	3.679	3.78717
ANO5	4.65873	4.53219	4.61548	5.11081	4.77257	4.85486	4.95906	4.28929	4.81929	4.3594	4.94952	4.6683	4.34437	4.78111	4.93353	4.78981	4.19786	4.40762	4.8504	4.72075	4.48532	5.4405	5.03593	6.0065	5.14967	5.484	5.2365	5.0882	4.95437	6.16167	4.93867
ANO6	4.81214	3.8481	4.01286	3.69476	3.92317	3.74643	3.69048	3.84792	3.92552	3.92857	3.7236	3.69254	3.83542	3.84279	3.62056	3.8892	3.91984	3.76452	3.89952	3.965	3.63857	3.789	3.673	4.10813	3.76475	3.8	3.8725	3.972	3.79567	3.752	3.85533
ANO7	4.32381	4.375	4.26155	4.35262	4.36774	4.3052	4.2851	4.3546	4.24276	4.25294	4.33167	4.46349	4.29124	4.06738	4.30381	4.52619	4.26992	4.50683	4.46425	4.20859	4.23455	4.16183	4.20533	4.28183	4.30517	4.2355	4.3	4.17217	4.25717	4.04467	4.35133
ANO7L1	4.48353	4.44123	4.51516	4.78825	4.36774	4.53119	4.56631	4.48103	4.50992	4.57582	4.44656	4.54849	4.557	4.41754	4.41619	4.48317	4.63881	4.59456	4.51387	4.31111	4.53976	3.94	4.2985	4.184	4.3105	4.31055	4.47233	4.5015	4.244	4.256	4.64979
ANO9	4.39008	4.21909	4.60591	4.4073	4.65531	4.50162	4.6159	4.71214	4.57071	4.67794	4.74103	4.85214	4.68226	4.45528	4.48063	4.74103	4.51758	4.25208	4.54285	4.71048	4.85297	3.85767	4.54525	4.024	4.41979	4.31055	4.17275	4.31683	4.50229	3.886	4.51383
ANOS1	5.84833	5.36984	5.78458	5.50266	5.6373	5.97532	5.95895	5.49905	5.48563	5.71732	5.81929	5.89379	5.78379	5.79532	5.4127	5.59643	5.73119	5.35831	5.89187	5.79381	5.53006	5.40917	5.4925	5.762	5.5455	5.4995	5.7495	5.5115	5.448	5.59733	5.59333
ANOS2P	3.93518	3.98667	4.26778	4.08464	4.08671	4.16621	4.06744	4.11275	4.03548	4.0697	4.11024	4.06429	4.14415	3.80563	3.98847	4.05579	4.02786	3.8773	4.07857	4.04791	4.03929	3.96133	4.07383	3.96842	3.95733	4.02967	3.99042	4.07317	3.97	4.04533	4.04733
ANP32A	5.83532	5.69377	5.60968	5.59496	5.68786	5.60675	5.68312	5.64198	5.64079	5.74476	5.73744	5.661	5.61881	5.67516	5.56861	5.76701	5.74724	5.725	5.86738	5.81181	5.61357	5.9505	5.71967	5.733	5.6215	5.87217	5.73051	5.8171	5.7235	6.2835	5.41729
ANP32A-IT1	9.31254	9.89413	9.76852	9.7	9.40548	9.45895	9.39476	9.87996	9.58881	9.80738	9.39202	9.53833	9.74024	9.48663	9.71464	9.38452	9.48964	10.0107	9.62	9.53913	9.72343	9.89367	9.5355	9.34175	9.456	9.8615	9.144	9.2865	9.438	9.37125	9.816
ANP32B	7.2881	7.47571	7.88833	7.9123	7.87	7.83405	8.0031	7.9402	7.81937	7.92988	7.84456	7.66778	7.94093	7.94298	7.89833	7.85468	7.9402	7.50778	7.99206	7.77357	7.90266	8.7345	8.0575	7.962	8.1625	8.01608	8.10242	8.133	8.082	7.9705	8.09413
ANP32C	4.97689	4.93716	4.82526	4.91491	4.9331	4.87555	4.84203	4.87833	4.81929	4.91175	4.79012	4.94952	4.70563	4.53219	4.74694	5.09079	4.745	4.67171	4.80298	4.94981	4.87838	4.52093	4.79777	5.1025	4.8725	5.01887	4.7975	4.7455	4.83817	4.8075	4.53767
ANP32D	5.45286	5.51944	5.53937	5.47216	5.35667	5.43159	5.55583	5.61881	5.51845	5.61716	5.51622	5.48333	5.60175	5.31421	5.4031	5.48157	5.367	5.5652	5.57238	5.39194	5.37437	5.77829	5.6125	5.3735	5.615	5.91188	5.586	5.656	5.5845	5.589	5.3745
ANP32E	5.8084	5.91964	5.91651	6.08921	5.98702	5.985	5.95452	5.9177	6.01092	5.89241	5.98532	5.7656	5.91964	5.93024	5.98683	5.94468	5.84313	5.97794	5.9523	5.9196	5.81683	6.90833	6.38333	6.68617	6.23733	6.59833	6.0565	6.22183	6.37283	6.58633	5.98767
ANPEP	6.48649	7.19389	6.49901	6.44387	6.57722	6.51683	6.29629	6.98702	6.76353	6.33384	6.20298	6.63917	7.12048	6.64183	6.45357	6.93143	6.74048	7.13976	6.81262	6.45167	6.73	4.452	6.05875	4.4825	5.32644	4.715	5.48483	5.33567	6.103	4.1085	6.392
ANTXR1	7.79722	7.97033	8.60429	8.99161	8.43603	9.24238	8.46095	8.38571	8.71944	8.33282	8.79411	7.63651	8.58161	8.89605	8.68992	7.8469	8.49857	8.02429	8.92165	8.92165	8.51357	8.876	8.5835	9.008	8.6725	8.825	8.6205	8.852	8.453	9.0595	8.57137
ANTXR2	5.98183	6.4848	6.59472	6.82421	6.51794	6.65135	6.49302	6.7473	6.59735	6.5573	6.49786	6.49311	6.5973	6.67643	6.60032	6.23728	6.61933	6.47667	6.57722	6.29167	6.51651	6.08745	6.41483	6.02742	6.41367	6.25228	6.17417	6.30823	6.4525	6.04788	6.40617
ANTXRL	3.6954	3.67656	3.74425	3.65143	3.68432	3.7031	3.61976	3.69048	3.74613	3.79619	3.62905	3.76032	3.73238	3.78151	3.61393	3.62579	3.70976	3.70409	3.65385	3.53524	3.83333	3.775	3.7845	3.69508	3.73567	3.7575	3.68183	3.729	3.73877	3.9795	3.68417
ANXA1	10.3746	10.3547	10.2684	10.3607	10.3248	10.4325	10.1932	10.2122	10.3804	10.278	10.2378	9.91702	10.1144	10.4888	10.3607	10.2246	10.2877	10.2267	10.2287	10.2122	10.2246	10.0853	10.0768	10.3635	9.90888	10.0207	10.2013	10.0184	9.99797	10.5288	9.86608
ANXA10	3.58	3.78381	3.76302	3.93079	4.05399	3.72524	3.83849	3.75897	3.88286	3.97119	3.85	3.80319	3.84611	3.76143	3.83024	3.71952	3.91024	3.89	3.77381	3.62218	3.83333	3.63342	3.95	3.73225	3.75517	3.905	3.547	3.972	3.61	3.865	3.895
ANXA11	6.32168	6.10151	6.24778	6.05437	6.12579	6.1648	6.13077	6.09194	6.29669	5.99389	6.21861	6.21734	6.13222	6.34107	6.19286	6.10516	6.16405	6.26778	6.2169	6.16913	6.14692	6.36617	6.28217	6.41642	6.06467	6.67033	6.214	6.16596	6.40933	6.58633	6.15617
ANXA13	3.95847	3.8056	3.55881	3.83476	3.76718	3.7379	3.81921	3.88931	3.74613	3.61321	3.86913	3.70286	3.8273	3.74	3.85167	3.82748	3.71952	3.78694	3.7631	3.83159	3.6619	3.9135	3.6865	3.87683	3.794	3.8	3.689	3.87817	3.649	3.752	3.86592
ANXA2	8.45548	7.93063	8.18994	7.9123	8.3231	8.22905	7.8631	8.06298	8.34262	8.18071	8.19254	8.34083	8.01714	7.75258	7.88397	8.40881	7.77194	8.17893	8.49365	7.95103	7.87421	6.991	7.64658	7.998	7.6585	7.5675	7.806	7.77083	7.5901	7.71008	7.46967
ANXA2P1	8.34222	8.4506	8.75394	8.40667	8.75905	8.84448	8.69067	8.48579	8.7956	8.61993	8.76742	8.88437	8.28548	8.73524	8.57345	9.17897	8.70363	8.41774	8.73405	8.8031	8.58893	8.121	8.16792	8.45625	8.1805	8.051	8.49	8.46	8.2665	7.998	8.3265
ANXA2P3	5.11317	5.62016	5.01786	5.47216	5.77552	5.89349	5.45595	5.63785	5.76706	5.6075	5.4746	5.98595	5.41806	5.32516	5.58742	6.13238	5.41442	5.47607	5.69381	5.70111	5.21694	4.78908	5.3775	5.6765	5.309	5.0365	5.55867	5.46667	5.264	5.27233	4.95
ANXA2R	6.00389	6.82321	6.90452	6.75927	6.84984	6.68298	6.88869	6.94802	6.64127	6.9269	6.71327	6.86976	7.09905	6.54698	6.62726	6.68349	6.91143	6.83095	6.50778	6.64825	7.17833	6.1425	6.566	5.3735	7.118	6.116	6.276	7.00833	6.69	5.7765	6.804
ANXA3	4.90127	4.94746	4.91175	4.89195	4.50377	5.87595	4.47429	4.55151	5.15349	4.97143	5.28651	4.51008	4.9373	4.87169	5.01393	4.43152	4.37963	4.92746	5.43364	4.89079	4.75381	6.41492	5.23337	7.074	5.48058	5.92302	6.7405	5.68	5.194	6.393	4.93867
ANXA4	8.40683	8.00024	8.38298	8.06897	8.20167	8.4431	8.23675	8.10762	8.33627	8.20381	8.2831	8.33365	8.24952	8.46214	8.10937	8.38679	8.33238	7.93317	8.32925	8.42639	8.33238	8.12925	7.756	7.8995	7.8305	7.962	7.93608	8.0305	7.81508	8.421	7.9105
ANXA5	9.82108	9.53833	9.74446	9.46524	9.56258	9.80429	9.54262	9.61208	9.79286	9.47587	9.60518	9.73655	9.47286	9.77368	9.49119	9.9666	9.67894	9.56833	9.59417	9.72343	9.5931	9.0615	9.289	9.7455	9.1985	9.455	9.667	9.39525	9.2985	9.645	9.302
ANXA6	7.84845	7.27613	6.92802	7.64036	7.50508	7.55671	7.53881	7.49548	7.61571	7.41351	7.61099	7.38421	7.57333	7.56079	7.50758	7.62929	7.42643	7.39202	7.68214	7.68778	7.2721	7.48592	7.74696	7.99267	7.853	8.083	7.90158	7.695	7.71742	7.6595	7.56283
ANXA7	7.58448	7.40238	6.99833	7.42095	7.43905	7.45698	7.48825	7.37357	7.37508	7.32151	7.43214	7.30433	7.40429	7.41214	7.37508	7.37833	7.43429	7.46484	7.52381	7.46024	7.27913	7.359	7.3085	7.76117	7.51575	7.4025	7.5145	7.4645	7.36433	7.79183	7.1435
ANXA8L1	5.29679	5.95205	5.36389	4.54817	4.95597	6.22468	4.36774	6.39937	5.2304	6.08667	5.68595	5.10234	6.21837	5.24837	7.13468	5.56937	5.44624	5.6981	6.97357	6.13028	4.92899	3.92125	4.20167	4.10813	4.59933	4.28	4.2895	4.5635	4.47575	3.97025	4.58037
ANXA9	4.38091	4.12095	4.0675	4.02	3.95024	4.03889	4.08852	4.09869	3.96381	3.9081	4.13024	4.2296	4.11837	4.0773	3.98288	4.17665	4.06873	4.11071	4.0524	4.31111	3.89302	3.72233	3.922	3.8135	3.7845	3.7575	3.8325	3.79133	3.915	3.792	3.79733
AOAH	6.54881	6.22139	6.29073	5.76611	6.37786	5.72651	6.2765	6.01907	5.84984	5.97373	6.45821	6.34056	6.13844	5.6373	5.93837	6.6069	6.20149	6.22747	5.56302	6.22802	6.31682	4.291	6.042	4.119	5.52983	4.685	4.5475	5.54483	6.07233	4.236	5.24452
AOC1	4.41516	3.97286	4.30967	4.11015	3.94095	4.26988	4.09773	4.06824	4.09838	4.33	3.97119	4.36205	4.06762	4.16	4.13853	4.30933	3.85071	3.95115	3.7631	4.29083	4.1201	5.38417	4.33	4.0875	3.9135	4.05633	4.0365	3.931	4.0355	4.01063	3.79733
AOC2	4.00845	3.93087	3.97246	3.92008	3.82881	4.03889	4.01802	3.84792	4.20881	4.01151	3.85	3.91786	4.0031	3.87619	3.974	4.09097	4.13079	4.02155	4.1475	3.89095	4.30817	3.95733	3.9135	3.91983	3.843	4.184	4.056	3.98123	3.985	3.917	3.931
AOC4P	4.13685	4.44123	4.70921	4.73385	4.54127	4.39066	4.72183	4.43429	4.59079	4.20377	4.28929	4.26365	4.50086	4.46532	4.75667	4.14405	4.47878	4.44544	4.68548	4.52355	4.32913	5.47283	5.776	6.0465	5.4365	6.9405	5.56667	5.297	5.734	6.73717	5.58742
AOPEP	6.14583	6.19032	6.67151	6.60651	6.46923	6.70742	6.59966	6.44037	6.69706	6.38573	6.36776	5.86738	6.54238	6.78293	6.83111	6.05437	6.36643	6.18817	6.72492	6.58103	6.44508	7.38108	7.11217	7.32167	6.93167	7.52667	7.10371	6.83217	7.08367	7.318	6.93933
AOX1	5.24563	4.89226	4.72226	4.82643	4.99579	5.25246	4.84681	5.28829	4.66806	5.33488	5.27889	5.48333	5.11985	4.93456	5.04087	4.54937	4.80733	4.87639	5.61881	5.06569	4.92389	6.6085	6.05425	6.63658	7.241	6.423	6.98467	7.40625	6.1755	6.48683	6.234
AOX2P	3.71048	3.76325	3.79262	3.77	3.82881	3.74643	3.66845	3.79052	3.79071	3.72405	3.7694	3.70917	3.70143	3.68147	3.89933	3.84155	3.81581	3.78694	3.64784	3.7748	3.82202	3.84325	3.72975	3.88633	3.77958	3.83017	3.94008	3.8115	3.74275	3.72708	3.792
AOX3P	3.94929	3.93087	3.85548	3.655	3.80444	3.7379	3.76143	3.72524	3.88286	3.71883	3.7236	3.69254	3.87619	3.74	3.59857	3.65405	3.76143	3.95115	3.96119	3.77175	3.84857	3.733	3.63	3.753	3.7845	3.584	3.9645	3.7815	3.67	3.792	3.922
AOX3P-AOX2P	3.84461	3.75381	3.53405	3.98667	3.8881	3.88841	3.94071	3.97506	3.9396	3.70334	3.91417	4.00397	3.87619	4.02452	4.01254	3.93857	3.84048	3.75359	3.92929	3.84157	3.84504	3.9355	3.779	3.8465	3.9585	3.78317	3.8435	3.741	3.885	3.8615	3.792
AP1AR	5.3904	5.2623	5.42984	5.3753	5.61643	5.57238	5.51839	5.25757	5.49675	5.41532	5.59405	5.66609	5.30532	5.46738	5.34147	5.72071	5.60806	5.28718	5.3799	5.50817	5.4973	5.38417	5.131	5.66633	5.14083	5.071	5.30096	5.28	4.88858	5.39092	4.9685
AP1B1	8.36181	8.01881	8.43603	8.27583	8.4731	8.3844	8.61651	8.4619	8.15829	8.46095	8.44357	8.79258	8.40667	8.33282	8.06151	8.71738	8.48079	8.04738	8.52357	8.53968	8.32171	6.80875	7.656	7.47975	7.797	7.073	7.545	8.0305	7.64425	7.0205	7.867
AP1B1P1	4.94385	5.00952	5.31304	5.18668	5.01563	5.00683	5.43413	5.72556	5.09164	5.43333	5.09341	5.91633	5.21259	5.24837	4.96694	5.38143	5.31024	4.85159	5.16151	5.1777	5.24776	4.56629	4.87346	4.7055	5.0015	4.745	4.7975	4.86483	4.93293	4.5355	5.31617
AP1G2	6.47671	6.1426	6.16746	5.93698	5.93823	6.13083	6.16702	6.14905	5.92534	6.06435	6.13196	6.37554	6.09517	6.15079	6.06145	6.34024	6.25413	6.04321	5.9523	6.13028	6.23577	5.10213	5.79563	5.0505	5.5115	5.3735	5.55042	5.625	5.70417	5.1155	5.83358
AP1M1	7.60754	7.14016	7.0725	7.07	7.1354	7.1956	7.13333	7.1319	7.21615	7.02885	7.19952	7.33397	7.07913	7.13743	7.18794	7.36802	7.29895	7.25048	7.26095	7.17234	7.13905	6.52875	7.00333	7.1225	6.86029	6.96	7.1905	6.85883	7.0115	6.41317	7.0815
AP1M2	3.64964	3.82776	3.95159	4.09952	4.00504	3.78443	4.0381	4.0381	4.05815	3.80397	4.00262	3.98212	4.06762	3.76143	3.90381	3.90952	3.93024	3.82984	4.11738	3.76101	3.87825	3.761	3.90387	4.07467	3.89367	3.78917	3.932	3.85029	3.922	3.865	3.7585
AP1S1	6.16028	6.01224	6.01333	5.76611	5.96204	6.1106	6.19833	5.74619	6.04433	5.92534	6.08868	6.13222	5.88302	6.02444	5.85828	6.21645	5.97534	5.97333	5.7669	5.99755	6.05913	5.23525	5.32417	5.4555	5.60383	5.2015	5.50933	5.55567	5.417	5.10283	5.704
AP1S2	6.54444	6.01224	6.21552	6.1404	6.25776	6.17556	6.62897	6.205	5.96504	6.24603	6.42095	6.70236	5.87878	6.25762	6.1673	6.55968	6.27233	6.02571	6.02077	6.25204	6.3225	5.941	5.997	5.87217	6.116	5.77633	5.93623	6.18883	5.93483	6.15675	5.96667
AP1S3	4.5572	4.48583	4.48028	4.46061	4.24956	4.42762	4.41242	4.49127	4.62298	4.49194	4.48317	4.44845	4.33988	4.49532	4.4444	4.45859	4.38404	4.46571	4.30948	4.46401	4.44452	3.9415	4.24575	4.24075	4.11775	4.2055	4.078	4.00122	4.2985	4.1425	4.35265
AP2A2	5.07084	5.00952	4.93821	4.76754	5.18075	5.47869	5.24402	5.1823	5.09164	5.11167	5.30714	5.23167	4.99833	5.19497	5.10987	5.53044	5.04903	4.84183	4.95234	5.26333	4.99013	4.67533	5.03593	4.95	4.94437	5.02706	5.2196	5.09917	4.976	4.73142	4.93867
AP2M1	9.54127	9.82905	9.48425	9.71333	9.66381	9.63357	9.69619	9.75881	9.73655	9.67894	9.6931	9.84664	9.85214	9.7104	9.54976	9.66194	9.79612	9.87538	9.67418	9.74173	9.6719	9.737	9.4925	9.58575	9.481	9.69075	9.446	9.45867	9.60267	9.7835	9.801
AP2S1	10.9299	11.0055	10.744	10.6414	10.687	10.5494	10.5993	10.6033	10.5494	10.6438	10.3438	10.7212	10.815	10.5494	10.3821	10.753	10.6386	11.0092	10.5309	10.4996	10.4996	9.5345	10.0768	9.629	10.0887	9.481	10.0941	10.2553	10.081	9.507	10.039
AP3B1	7.27302	7.17254	7.23893	7.25155	7.17937	7.3227	7.29119	7.28571	7.20329	7.26246	7.15	7.28488	7.21337	7.06667	7.23829	7.4127	7.26143	7.16714	7.37	7.15256	7.34563	7.2744	6.95483	7.236	7.20017	6.848	7.155	7.26008	6.90833	7.29858	7.0985
AP3B2	3.6581	3.78381	3.76302	3.71607	3.82881	3.82762	3.9078	3.86771	3.75659	3.80397	3.90881	3.86671	3.59357	3.6019	3.72135	3.49738	3.68841	3.81895	3.87825	3.67611	3.89302	4.0455	3.80283	4.024	3.8845	3.895	3.8435	3.972	4.4405	3.907	3.8065
AP3M1	5.56119	5.54357	5.56079	5.68153	5.51758	5.54611	5.6181	5.79611	5.72995	5.72176	5.67861	5.70274	5.43417	5.69468	5.61917	5.72071	5.57532	5.37095	5.56302	5.61706	5.47619	5.32	5.46067	5.85542	5.48058	5.5235	5.79413	5.49667	5.4385	5.62375	5.65925
AP3M2	5.59743	5.96228	5.81903	5.68153	6.20377	5.96405	5.6181	5.76687	5.94652	5.77738	5.8544	5.71314	5.96548	5.80004	6.04119	5.867	5.74724	6.04321	6.035	5.92476	5.91633	6.15433	6.1845	6.34783	5.997	6.4836	6.052	6.0165	6.0223	6.566	5.93767
AP3S1	7.84845	7.66524	7.76595	7.83738	7.75913	7.74821	7.83095	7.64869	7.81937	7.6754	7.7521	7.5677	7.75111	7.85307	7.68155	7.59246	7.57437	7.68119	7.87421	7.67306	7.70579	7.855	7.75917	7.98717	7.65044	7.61567	7.89683	7.73567	7.76033	8.0563	7.60783
AP3S2	7.49933	7.1604	6.9156	7.10687	7.1354	7.17571	6.84032	6.87458	6.94897	7.10337	6.87924	7.38421	7.16972	6.89833	7.03357	7.25048	6.95379	7.0504	6.84405	7.30175	6.92131	6.81467	6.8215	6.804	6.5185	6.65567	6.8675	6.56642	6.72833	6.79796	6.55342
AP4B1	4.90687	5.19185	5.17663	5.27206	5.23016	5.25246	5.22762	5.31325	5.24698	5.24024	5.22135	5.15583	4.82246	5.29729	5.2166	5.37548	5.35504	5.172	5.1645	5.21548	5.47619	5.28385	5.05883	4.99367	5.01033	4.828	4.861	5.0255	5.1325	5.0315	5.18
AP4E1	6.72082	6.81369	6.86429	6.85234	6.76905	6.7246	6.66802	6.70099	6.74198	6.68438	6.71327	6.59996	6.43032	6.84675	6.77857	6.58976	6.65738	6.8494	6.69502	6.60111	6.78643	6.424	6.47197	6.50113	6.3918	6.15025	6.66033	6.576	6.596	6.33925	6.68092
AP4M1	4.89087	4.8004	5.07298	4.93927	4.98095	5.04413	5.03558	4.98539	4.91833	5.04254	5.04095	4.97918	4.78775	5.1119	5.1231	4.99543	5.01167	4.73391	4.95942	4.99744	5.10667	5.1425	4.91412	5.38313	4.85833	4.93933	5.203	4.9225	4.9595	4.93683	5.10233
AP4S1	4.50924	4.25564	4.55546	4.40992	4.63445	4.46667	4.49151	4.49405	4.51925	4.50922	4.5497	4.49266	4.4177	4.39833	4.33183	4.65804	4.36433	4.42286	4.46713	4.48988	4.32913	4.822	4.675	4.864	4.6475	4.61109	4.50417	4.62312	4.6335	5.0812	4.51383
AP5B1	5.6496	5.04024	5.32135	5.03452	5.24063	5.16252	5.49337	5.00921	5.49675	5.21222	5.3169	5.48333	5.27637	5.18197	5.15131	5.33333	5.16228	5.08155	5.07419	5.04837	5.18302	4.52093	4.79777	4.83119	4.6975	4.8725	4.60388	4.8485	4.8705	4.369	4.8175
AP5S1	6.17004	6.46223	6.15976	5.95488	5.97226	5.83417	6.02502	5.98476	5.97833	6.00429	5.84381	6.18905	5.86626	5.97254	6.00109	6.14475	6.11762	6.45169	5.85879	5.99755	6.17357	5.299	5.557	5.695	5.86183	5.266	5.969	5.88583	5.59392	5.39923	5.74417
AP5Z1	6.26989	6.34772	6.35048	6.29577	6.4924	6.32111	6.37619	6.38573	6.39246	6.40762	6.43107	6.63262	6.30756	6.31127	6.23836	6.58413	6.3731	6.36333	6.26976	6.34044	6.18885	5.872	6.03475	6.18283	5.93917	5.8445	6.0295	6.1915	6.05663	5.69923	6.205
APAF1	4.69938	4.81577	4.88119	4.82246	4.79167	4.76298	4.75401	4.85722	4.76002	4.96159	4.6325	4.87231	4.82643	4.97011	4.85048	4.67692	4.67544	4.74524	4.59396	4.58889	4.85297	4.69417	4.72467	4.756	4.25333	4.666	4.6515	4.524	4.65825	4.609	4.6395
APBA1	5.47516	4.89226	4.95079	4.8006	5.08294	4.86929	4.78979	4.94093	4.86389	4.73595	5.03167	5.3452	4.84352	4.76657	4.70714	5.10591	4.94665	4.71345	5.05523	5.1319	4.80563	5.10658	4.8127	4.9855	4.77212	5.09842	4.81767	4.65633	4.797	4.891	4.6445
APBA2	4.48353	4.24603	4.43083	4.39008	4.41349	4.44222	4.30173	4.36556	4.34997	4.68294	4.23357	4.24762	4.4838	4.39833	4.21514	4.08296	4.37963	4.33241	4.33857	4.43863	4.44767	3.941	4.3025	3.87683	4.4055	4.15317	4.17275	4.2685	4.4125	4.385	4.201
APBA3	4.95615	4.96518	4.6681	4.81254	4.9331	5.01429	4.72183	4.58688	4.68956	4.80906	4.69271	4.8239	4.73794	4.82546	4.6159	4.76952	4.88345	4.73391	4.67641	4.62675	4.91238	4.452	4.43283	4.4205	4.3105	4.3415	4.6215	4.401	4.3595	4.4838	4.6395
APBB1	4.52996	4.21909	4.58155	4.69913	4.64871	4.73179	4.56631	4.53631	4.65786	4.56998	4.85057	4.48825	4.63457	4.60433	4.72857	4.56937	4.53349	4.50683	4.73079	4.79484	4.63694	4.8495	4.93683	5.21075	4.85833	5.37783	5.05933	4.8925	4.98133	5.1245	4.90522
APBB1IP	8.17145	7.8746	7.88397	7.75937	7.90167	7.56869	8.13929	7.91798	7.67468	8.00921	7.82643	8.02417	8.0706	7.75837	7.50758	8.04786	7.93627	7.91	7.73127	7.82242	8.15829	5.686	6.8885	6.1275	7.24833	5.55467	6.78942	7.16575	6.87392	5.28	7.06908
APBB2	4.99464	5.15268	5.57973	5.50821	5.14975	5.44806	5.11733	5.39659	5.51845	5.26274	5.40243	4.97918	5.17349	5.41442	5.55103	4.99543	5.08313	5.26492	5.48905	5.42298	5.1649	6.1355	5.89257	6.75	6.178	6.25933	6.41617	6.15517	5.83029	6.4615	6.0065
APBB3	6.05206	5.82381	5.96548	5.81552	6.08079	5.91683	5.84313	5.9127	5.79399	6.05486	6.05499	6.05238	5.7558	6.19103	6.06835	6.0553	5.95205	5.80565	5.97397	6.00746	6.15738	6.02575	6.07675	5.51867	5.77633	6.11183	5.71258	5.82988	6.1625	5.64308	6.1425
APC	4.87555	5.11806	5.26175	5.21206	5.20302	5.26508	5.19185	5.29492	5.2781	5.27651	5.14151	5.14098	5.29103	5.37639	5.21417	5.09345	5.15369	5.05235	5.29052	5.04246	5.17127	5.4285	5.131	5.38313	5.155	5.299	5.17167	5.20934	5.1585	5.562	5.26767
APC2	4.25192	3.95143	4.05738	3.85603	4.15397	4.27982	3.97496	4.17754	4.14897	4.11237	3.82103	3.96024	3.94603	4.22754	4.04944	3.93119	3.91024	3.97333	3.96119	4.18143	3.9927	4.27329	4.0005	4.442	4.1735	4.48	4.2575	4.0175	3.78733	4.442	4.0525
APCDD1	4.98621	4.77135	4.26155	4.66594	4.65905	4.73576	4.31325	4.58329	4.57071	4.37341	4.75452	4.55468	4.47429	4.45528	4.5119	4.32603	4.54397	4.79252	4.80298	4.61329	4.35829	5.16792	4.9665	5.25267	5.28767	5.484	5.57067	5.28	5.00867	5.4695	4.605
APCDD1L	6.12014	5.95205	5.11976	5.53202	4.76234	5.68381	4.42378	5.22246	5.73944	4.85762	4.61214	5.4231	5.25357	5.19497	4.20853	5.05833	5.89466	6.05901	5.03103	5.23575	5.48552	4.652	4.95771	4.63867	4.676	4.91492	5.695	4.685	4.93293	4.78817	4.61913
APCDD1L-DT	3.89817	3.96228	3.86656	4.04127	4.40762	4.06821	4.05746	3.91048	4.03548	4.01151	4.01143	4.07952	3.9371	3.74992	3.92456	4.05915	4.02167	4.04065	3.86833	3.89952	4.0204	3.931	4.057	3.79387	3.992	4.078	3.86177	3.82033	3.78733	3.85425	4.03313
APCS	4.32008	4.46643	3.99262	4.73385	4.34996	4.47694	4.37881	4.59627	4.39467	4.35048	4.42706	4.69027	4.48988	4.35101	4.50071	4.96632	4.50917	4.45595	4.67641	4.43863	4.53976	4.652	4.5045	4.4825	4.68583	4.48992	4.81767	4.363	5.0315	4.256	4.492
APEH	6.17976	5.93067	6.24381	6.1404	6.31682	6.3933	6.49897	6.2281	6.31044	6.25762	6.47881	6.53746	6.05849	6.33119	6.30179	6.63198	6.56929	5.88675	6.26976	6.36433	6.35583	6.116	5.901	6.20217	6.1947	5.78321	6.2555	6.2145	5.9785	5.76617	6.285
APEX1	5.2119	5.1624	5.17151	5.51183	5.35667	5.35032	5.42294	5.56905	5.50734	5.46181	5.50325	5.49469	5.31325	5.35548	5.4569	5.81741	5.65087	5.38937	5.49504	5.45476	5.28401	5.289	5.52041	5.804	5.53933	5.5655	5.55042	5.587	5.40633	5.39092	5.64967
APEX2	7.36913	6.98452	6.64774	6.65742	6.73024	6.61528	6.87833	6.72552	6.66802	6.74956	6.73136	6.96405	6.89798	6.6019	6.61702	6.87338	6.68082	6.98488	6.74016	6.73571	6.75774	6.08237	6.35047	6.2775	6.337	6.04309	6.30363	6.25667	6.459	5.969	6.285
APH1A	6.29929	5.84114	6.07609	5.8719	5.97226	6.20018	6.27079	6.1177	6.03865	6.43833	5.78167	6.22373	5.88302	6.27254	5.83179	6.29651	6.40048	5.90206	6.1421	6.10865	6.21891	5.3525	5.9085	5.88867	6.106	5.76267	5.87833	5.87725	5.9085	5.57283	6.16225
APH1B	7.83095	7.38056	7.44738	7.20881	7.2831	7.28536	7.7169	7.3169	7.32655	7.39008	7.35071	7.71379	7.40429	7.41214	7.14849	7.59709	7.46722	7.4127	7.39143	7.44631	7.44738	6.2455	6.89417	6.83975	7.155	6.1875	6.97462	7.16575	7.0615	6.30958	7.128
API5	5.47016	5.6604	5.60532	5.73952	5.48175	5.5223	5.53675	5.6626	5.59988	5.71133	5.60238	5.61597	5.55575	5.62219	5.45304	5.67004	5.45992	5.69315	5.50619	5.55992	5.66067	5.66088	5.55054	5.93167	5.5455	5.603	5.60101	5.61933	5.5525	6.22383	5.5115
APIP	5.06754	4.78813	4.79378	4.82643	4.85405	4.77135	4.95597	4.96293	4.78452	4.80035	5.16825	5.05968	4.97202	4.82546	4.74694	4.98394	4.85291	4.88944	4.72411	4.75127	4.59246	4.68017	4.79777	4.8075	4.7432	4.71892	4.7335	4.78938	4.68371	4.97203	4.61913
APLF	3.63	3.86833	3.82381	3.71607	3.95024	3.74643	3.54333	3.76829	3.88286	3.82444	3.69476	3.67008	3.85476	3.53786	3.76312	3.77369	3.71952	3.89	3.91024	3.84157	3.7419	3.92125	3.8435	3.64958	3.86375	3.8	3.771	3.82033	3.953	3.84479	3.73933
APLN	5.05321	6.34044	5.10848	6.36206	6.6444	5.60175	6.95548	6.13196	7.11262	5.93887	5.97857	5.52699	5.17349	6.34107	5.21056	5.19522	5.79095	6.29271	5.88081	5.33179	6.33905	4.54554	6.9805	4.7465	4.41979	5.753	4.33	4.3425	7.03117	4.61983	6.29325
APLNR	3.8681	4.61008	4.28238	4.37544	4.24587	4.02978	4.37881	4.14921	3.86394	4.31992	4.05065	4.09754	4.26667	4.19758	4.10905	4.14405	4.45079	4.47563	4.12905	4.18143	4.36138	4.1285	4.0375	3.898	4.115	4.291	4.15508	3.931	4.07508	4.34967	4.60963
APLP1	4.43274	4.40881	4.55546	4.54817	4.43317	4.62929	4.63185	4.37095	4.53911	4.46028	4.51544	4.5794	4.47859	4.35101	4.46048	4.55992	4.55992	4.52563	4.65548	4.47548	4.66884	4.38167	4.64979	4.8815	4.401	4.923	4.80758	4.524	4.55887	4.7235	4.4819
APLP2	10.2748	9.84849	9.91262	9.69143	9.93731	9.82521	9.78167	9.71595	9.96212	9.72138	9.87849	9.59683	9.77093	10.0627	9.84849	9.82905	9.74738	9.8619	9.82328	9.74173	9.53595	9.2344	9.5355	9.732	9.26342	9.7665	9.7705	9.5535	9.592	9.68025	9.42815
APMAP	5.75667	5.60994	5.94817	5.95488	6.41893	6.24614	6.19833	6.0552	6.155	6.42143	6.44706	6.34056	5.98726	6.21246	5.93837	6.48016	6.25413	5.53522	6.035	6.22802	5.97754	5.0225	5.6955	5.60333	5.87133	5.45783	5.74417	6.1735	5.7745	5.00497	5.78325
APOA1	4.23763	4.01405	3.91714	3.92008	4.08746	3.94762	3.85944	4.05202	3.87817	4.01789	3.97405	4.02479	4.14348	3.96829	3.91958	4.10018	3.93024	4.04065	3.88714	3.86762	3.98578	5.06973	4.03433	4.098	4.0265	4.13483	4.078	4.0995	4.155	4.305	4.02758
APOA2	3.60119	3.76325	3.7131	3.72683	3.59083	3.71413	3.60103	3.94464	3.81405	3.7731	3.80198	3.74303	3.7631	3.77115	3.85167	3.77369	3.75103	3.76452	3.65762	3.85167	3.6202	3.6815	4.4515	3.6995	3.76475	3.547	3.628	3.761	4.07508	4.24558	3.775
APOA4	3.61202	3.63921	3.7831	3.89881	3.86825	3.78443	3.62929	3.55675	3.91363	3.93929	3.85	3.89873	3.67786	3.84279	3.75286	3.79447	3.67952	3.88127	3.72181	3.62218	3.86244	3.69133	3.70683	3.8245	3.74467	3.8845	3.942	3.699	3.9315	3.803	3.81695
APOA5	3.77875	3.76325	3.58667	3.89881	3.77556	3.83857	3.95611	3.96488	3.61262	3.6719	3.89857	3.80319	3.81643	3.82212	3.90381	3.98563	3.69786	3.93929	3.95143	3.87262	3.89952	3.894	3.80283	3.773	3.8325	3.895	4.0465	3.90798	3.885	3.865	3.95175
APOB	3.97246	3.90587	4.0675	4.01088	3.98262	4.02325	3.9704	3.86357	4.01024	3.84964	4.05607	3.82714	4.06762	4.00262	3.96877	3.83333	3.89944	3.93929	4.09524	4.05815	3.97881	3.95308	4.05217	4.268	3.922	4.26833	4.1275	4.062	4.14	4.411	3.992
APOBEC1	3.57048	3.74347	3.64357	3.61214	3.30833	3.62929	3.77238	3.57762	3.65077	3.73937	3.69476	3.74303	3.85476	3.85463	3.59857	3.67536	3.62857	3.39409	3.64784	3.58905	3.56833	3.79943	3.725	3.907	3.656	3.604	3.617	3.82917	3.699	3.69038	3.905
APOBEC2	3.93929	3.89881	3.83438	3.82381	3.69405	3.56786	3.57262	3.77905	3.80452	3.79246	3.66333	3.76738	3.68714	3.90614	3.69845	3.71952	3.9727	3.67167	3.815	3.80206	3.6469	4.14692	3.8645	3.8245	3.8735	3.83933	3.8725	3.8405	3.8645	3.752	3.728
APOBEC3A	4.41516	6.13222	5.67302	5.12083	4.19603	4.79113	4.40079	4.9127	4.91833	5.51371	4.81685	4.64032	4.82643	4.73456	4.84024	5.07028	3.86913	5.95496	4.08403	4.66579	5.63615	4.1655	3.80283	4.64608	4.096	4.39533	4.0165	4.28867	3.709	4.38025	3.86592
APOBEC3B	5.08143	5.75835	5.57359	5.1304	4.45338	4.89909	4.74512	4.95944	5.06687	5.34468	4.96774	4.81471	4.95824	5.12679	4.77869	5.3224	4.1204	5.73032	4.49135	4.74623	5.47619	4.3415	4.4165	4.56517	4.578	4.40491	4.50158	4.58263	4.46763	4.411	4.38417
APOBEC3C	6.80913	5.88736	5.98118	5.79409	6.06476	6.01162	5.90714	5.86433	5.91645	5.92534	6.14071	6.12298	5.9129	5.95456	5.95532	6.14475	5.98595	5.88675	5.9431	6.11169	6.12357	5.0225	5.40845	5.27417	5.65337	5.1825	5.695	5.75933	5.417	5.19567	5.64967
APOBEC3F	6.10524	5.78377	5.87849	5.72056	5.705	5.88175	5.78417	5.71689	5.88452	5.73925	5.93823	5.89758	5.93032	5.84679	5.83764	5.867	5.80317	5.81944	5.65885	5.89802	5.82832	5.50517	5.3505	5.1245	5.68458	5.0365	5.56667	5.73051	5.3005	5.408	5.55592
APOBEC3G	6.60508	6.2871	6.58929	6.5577	6.78444	6.7548	6.87833	6.68861	6.43206	7.02885	6.77857	6.73607	6.67266	6.51841	6.63802	6.98452	6.75421	6.15754	6.38639	6.95405	7.16155	5.69733	5.834	5.2985	6.40858	5.42883	5.586	6.4925	5.80492	5.3335	6.24525
APOBEC3H	4.51016	4.27857	4.49893	4.32881	4.71452	4.55774	4.67421	4.49611	4.12349	4.64869	4.48317	4.17177	4.32693	4.35101	4.30198	4.29292	4.5391	4.0973	4.34075	4.56286	4.60349	3.86833	4.12583	3.895	4.13683	3.711	3.765	4.348	4.155	3.6865	4.28817
APOBEC4	3.8573	4.02095	3.68571	3.81405	3.8881	3.7379	3.80198	3.56952	3.83369	3.99214	3.73246	3.60452	3.94603	3.59667	3.62056	3.79447	3.64817	3.60476	3.62619	3.69548	3.69476	3.7515	3.6865	3.581	3.86375	3.68808	3.8725	3.8012	3.85408	3.761	3.659
APOBR	7.61766	7.71778	7.60778	7.22992	7.39202	7.36524	7.52714	7.60802	7.49768	7.38056	7.51167	7.67976	7.57333	7.30988	7.23829	7.81044	7.63778	7.72929	7.52766	7.27913	7.66524	4.312	6.545	4.7735	6.144	4.89483	5.2365	6.09567	6.5355	4.369	6.9435
APOC1	11.4919	10.3308	9.99694	9.25345	10.4156	10.5805	11.2507	10.3158	10.3917	10.0017	10.4306	11.3264	10.2267	9.89413	9.51071	11.1307	10.2606	10.2516	10.4996	10.2931	10.5563	5.71667	10.178	4.93867	10.194	5.364	5.45533	10.1015	10.2093	6.8825	9.51788
APOC2	7.3281	5.98488	7.185	5.65081	6.3869	6.19462	6.64679	5.15282	7.45464	5.98377	5.70405	7.71379	6.22956	6.70063	6.04119	7.67119	5.75659	5.81556	6.3768	5.77468	6.45937	3.94	5.81433	3.773	5.5209	3.93017	4.0365	5.56621	5.6275	3.61742	5.30408
APOC3	3.6581	3.6719	3.73252	3.80385	3.62992	3.69435	3.70214	3.79052	3.59369	3.61321	3.88016	3.79077	3.81643	3.82212	3.87266	3.84849	3.8031	3.73327	3.6696	3.80206	3.71111	3.79943	4.20167	3.641	3.6385	3.78917	3.74967	3.931	3.895	3.85425	3.689
APOC4	5.96449	5.02999	4.7681	4.6045	5.08294	5.21383	5.94443	4.98929	4.85433	4.89095	4.97887	5.27621	4.65873	4.90988	4.55358	5.63964	5.07169	5.02325	5.19069	5.27381	4.89048	5.1815	4.92117	4.41117	4.93642	4.3765	4.27767	4.685	4.8975	4.22667	4.36627
APOD	4.69058	4.41859	4.12107	4.32048	4.53294	4.26988	4.17401	4.52242	4.229	3.93929	4.10119	3.97171	4.15919	3.8969	4.19794	4.53976	4.30921	4.65387	4.40746	4.18143	4.17849	5.83683	6.91175	5.9785	6.6585	7.70083	7.58325	6.59583	6.9425	6.576	5.6855
APOE	12.6311	12.4832	12.2323	11.6845	12.4832	12.3476	12.6311	12.5571	12.2786	12.3243	12.3243	12.6311	12.371	11.9924	11.963	12.6311	12.4832	12.4832	12.397	12.4832	12.3014	8.5075	12.2	8.2	12.0288	9.6475	8.96525	11.9998	12.11	9.92383	12.016
APOF	3.63	3.8481	3.73252	3.64357	3.77556	3.69435	3.85548	3.93238	3.78595	3.86529	3.59845	3.8327	3.77286	3.70963	3.8081	3.84849	3.93959	3.76452	3.80494	3.69548	3.95738	3.69133	3.832	4.4615	3.80283	3.8515	3.524	3.7815	3.709	3.865	3.78717
APOH	3.47333	3.82776	3.54202	3.74762	3.64857	3.71413	3.67857	3.46714	3.65077	3.79246	3.66333	3.57643	3.69476	3.6019	3.44988	3.74024	3.58833	3.48619	3.79505	3.77175	3.63857	3.79943	4.08921	3.57233	3.656	3.604	3.535	3.72	3.90467	4.11883	3.79733
APOL1	7.83944	7.58179	7.4025	7.43238	7.24889	7.50175	7.44595	7.42643	7.52194	7.53762	7.41345	7.51131	7.61619	7.38631	7.30726	7.30595	7.51405	7.60468	7.23143	7.54167	7.73591	7.09625	7.5825	7.375	7.3585	7.1655	7.11558	7.44317	7.507	7.01425	7.1095
APOL2	8.19036	8.46873	8.55224	8.39012	8.25627	8.47849	8.28742	8.44405	8.54143	7.9769	8.23675	8.43004	8.55425	8.35085	8.30294	8.3129	8.44607	8.52526	8.18667	8.39643	8.63127	8.121	8.3265	8.22317	8.53383	8.313	8.083	8.4385	8.36892	8.0935	8.3265
APOL3	4.61048	4.84352	4.94214	5.00087	4.72468	4.8597	4.93492	5.10667	4.81929	5.19395	4.87829	4.89238	4.96734	4.80957	4.9079	4.73627	5.13794	4.85762	4.77855	4.90726	5.20071	5.0595	5.029	4.95593	5.14483	4.86667	5.04171	5.0315	4.9595	4.68637	5.08617
APOL4	4.295	4.40385	4.54381	4.7225	4.14905	4.29778	4.57786	4.46708	4.49147	4.50922	4.2699	4.6154	4.37786	4.58907	4.20853	4.40524	4.45593	4.35488	4.26753	4.14532	4.69933	4.79483	4.50121	4.59992	4.6665	4.505	4.372	4.8175	4.55265	4.2165	4.715
APOL5	4.20952	3.8576	3.87647	3.84556	3.84835	3.95143	4.02841	3.75897	3.82452	4.03929	3.90881	4.10833	3.65262	3.665	3.81924	3.85825	3.89944	3.98262	3.99252	3.89952	4.17849	3.92125	3.773	3.6995	3.9315	4.097	4.006	3.99117	3.9315	3.835	3.941
APOL6	5.94524	5.98928	6.07609	5.80849	5.83389	5.92195	5.90901	6.06258	5.87825	6.11237	5.98397	6.13992	6.08809	5.93837	5.93837	6.06532	6.06888	5.99609	5.66084	6.05484	6.21135	5.40633	5.68111	5.27933	5.74283	5.501	5.48117	5.71433	5.64417	5.37208	5.804
APOLD1	8.0931	8.07143	7.98423	8.06897	8.13286	8.02635	8.17772	8.14946	8.0381	8.02429	8.12952	7.94988	7.93103	8.14329	8.24821	7.99375	8.04908	7.93317	7.9731	8.06381	7.98119	8.25342	8.083	8.37025	8.09125	8.24108	8.046	7.95767	8.1345	8.23225	8.267
APOM	5.02929	4.95942	4.94847	4.78118	5.13794	4.86929	5.05806	4.86625	4.93303	4.71062	4.99643	5.25927	5.12381	4.80236	4.84794	4.89385	5.00325	4.89333	4.88675	4.97964	5.06278	4.7632	4.9175	5.17483	5.08564	4.84432	4.9325	5.19783	4.8925	4.93683	4.8815
APOO	7.3281	7.03988	6.92802	6.82095	7.05952	7.03595	7.28012	7.05214	7.15089	7.07214	7.04008	7.54905	7.02363	7.06667	6.77857	7.69321	7.22893	7.13976	6.9123	7.15256	7.24048	6.67	6.71942	6.4588	6.79175	6.15025	6.37533	6.77217	6.8395	6.349	6.661
APOOL	5.4126	5.76716	6.00315	5.81552	5.80608	5.69377	5.83698	5.62929	5.95671	5.56981	5.74377	5.7423	6.00071	5.72755	5.94619	5.8076	5.89466	5.78658	5.92276	5.75651	5.88236	6.223	6.15517	6.4478	6.4295	6.2145	6.5855	6.37042	6.15829	5.7335	5.66717
APOOP5	4.11817	4.04238	4.17127	4.14748	4.2069	3.82762	3.85548	4.17754	4.11944	4.10127	3.99214	3.74303	4.05621	4.02929	4.15868	4.3294	4.13079	4.31952	4.06393	4.1181	4.1201	4.06417	3.989	4.1495	4.1635	4.24567	4.23633	4.164	4.012	3.95883	4.266
APP	7.52536	8.08024	8.39012	8.32833	7.92518	8.21488	8.0444	8.10762	8.13556	8.19119	7.88857	7.73	8.25968	8.21024	8.19076	7.5496	8.05462	8.21143	8.0381	7.81167	7.88952	7.871	8.36792	8.1265	8.29375	8.92454	8.24025	8.269	8.318	8.123	8.5835
APPBP2	6.00389	6.24437	6.43119	6.64107	6.5879	6.50579	6.32667	6.40786	6.45274	6.43278	6.55226	6.46833	6.37605	6.54698	6.58968	6.45171	6.46126	6.28196	6.4261	6.72313	6.44029	7.06275	6.2355	6.98633	6.78267	6.6445	6.70633	6.74083	6.1415	7.195	6.7815
APPL1	7.35532	7.41327	7.93246	8.00476	7.80405	7.82137	7.92651	7.59778	7.77745	7.6754	7.88857	7.4731	7.86274	8.04103	7.83	7.51603	7.57881	7.34889	7.73619	7.29175	7.82294	7.976	7.5605	8.016	7.8415	7.50417	7.43875	7.9155	7.53567	7.63833	7.756
APPL2	6.2581	5.6972	5.76706	5.79409	5.64187	5.76952	5.87702	5.70755	5.69453	5.77738	5.72417	5.73207	5.66798	5.84679	5.58742	5.76134	5.66016	5.66827	5.81944	5.66567	5.72964	5.3415	5.52041	5.41713	5.694	5.266	5.5945	5.656	5.53888	5.65483	5.65925
APRT	9.09161	9.09964	8.83524	8.79258	8.47968	8.59433	8.73071	8.67815	8.71944	8.83627	8.71944	8.93556	8.79258	8.52095	8.06762	8.87762	8.89183	9.10833	8.7459	8.41552	9.04845	8.2875	8.607	8.61117	8.68988	8.2325	8.419	8.6245	8.6815	8.11842	8.729
APTX	5.76023	5.74846	5.84984	5.93236	5.74849	5.82915	5.94722	5.8152	5.73619	5.80956	5.79389	5.94383	5.97333	5.78377	5.79484	5.95571	5.9054	5.7502	5.69778	5.72849	5.71405	6.05521	5.97867	6.03142	5.726	5.845	5.8365	5.71325	5.81358	5.80825	5.773
AQP1	7.83095	8.31198	9.15667	9.46524	9.0881	9.53595	9.05143	8.88929	9.33333	8.8944	9.19976	8.74435	8.8816	9.12714	9.35619	8.68817	9.02795	8.36452	9.16345	9.25452	8.68201	9.17833	9.34521	9.9795	9.50575	9.7455	9.856	9.712	9.3605	9.64192	9.59
AQP10	3.94929	4.29591	4.14099	4.04127	3.69405	4.38198	3.9078	3.92214	4.1894	4.3594	4.15881	4.05849	4.09905	4.21635	3.9931	3.90952	4.08968	4.05935	3.94095	4.02292	4.31905	3.9035	4.0105	4.3005	3.963	4.08767	4.0165	3.99117	4.2345	4.1765	3.85533
AQP11	4.13685	4.07577	3.7131	3.92008	4.08079	4.00095	3.86571	3.84792	4.03548	4.03929	4.07052	4.09754	4.12881	3.9831	4.00242	4.12052	3.76143	3.67786	3.89952	4.05262	4.19881	3.771	3.822	4.0455	3.9315	3.6985	3.91383	4.0175	3.79567	4.088	3.7675
AQP12B	3.53119	3.74347	3.88802	3.70552	3.63937	3.84881	3.57262	3.79052	3.68881	3.89833	3.7236	3.76738	3.70286	3.71841	3.83024	3.63333	3.78252	3.71224	3.6696	3.89095	3.75706	3.6615	3.7365	3.79387	3.8845	3.7175	3.8017	3.8115	4.0355	3.69038	3.835
AQP2	3.69152	3.76325	3.87647	3.62333	3.64857	3.63619	3.60103	3.87817	3.69683	3.67905	3.80198	3.76738	3.63619	3.72893	3.44988	3.75143	3.51571	3.63643	3.71119	3.64298	4.06841	3.761	3.6585	3.6195	3.823	4.16342	3.8725	3.921	3.709	3.782	3.73933
AQP3	4.13119	4.49127	4.35087	4.54817	4.47563	4.62929	4.49639	4.39361	4.32238	4.53433	4.62762	4.27198	4.49367	4.44421	4.53891	4.5275	4.66642	4.36738	4.50216	4.42548	4.4173	4.012	4.35983	4.2085	4.39725	4.2105	4.47667	4.51642	4.1686	4.2241	4.51383
AQP4	3.61202	3.21714	3.75405	3.85603	3.62992	3.48476	3.89714	3.46714	3.52905	3.73937	3.37524	3.53345	3.54202	3.6146	3.54667	3.70929	4.46829	3.59643	3.5969	3.61131	3.71865	3.656	3.391	3.484	3.546	3.7175	3.617	3.678	3.709	3.524	3.6785
AQP4-AS1	3.81836	3.68365	3.88802	3.58643	3.8881	3.61905	3.79107	3.73748	3.795	3.88714	3.69476	3.65573	3.94603	3.72893	3.93369	3.70929	3.85071	3.71224	3.6696	3.52595	3.63857	3.847	3.714	3.68955	3.843	3.8845	3.72	3.8012	3.79567	3.6995	3.728
AQP5	5.28071	5.04976	4.6369	4.99645	4.73095	4.82461	4.75401	4.77938	4.85433	4.90206	4.94952	5.02333	4.81659	4.70381	4.73803	5.12595	4.79468	5.3806	5.28389	4.93119	4.97884	5.12221	4.8175	4.929	4.98982	5.08367	5.3725	5.0365	4.8975	4.96067	4.62933
AQP7	3.87286	4.01405	3.92098	3.89381	3.92857	3.96714	3.98119	3.91786	4.02937	3.945	3.78732	3.79077	3.92143	3.88937	3.97048	3.93714	4.01595	3.91714	3.92143	3.81214	3.83655	4.0865	4.1545	4.05897	4.138	4.07217	4.28113	4.401	4.13658	4.215	3.9605
AQP7P1	4.25795	4.27214	4.10456	4.17791	4.09746	4.34214	4.22484	4.31517	3.95024	4.26238	4.17746	3.98212	4.36203	4.35101	4.44544	4.06857	4.34456	4.19032	4.09972	4.19754	3.97135	4.8815	4.8075	4.445	5.75682	4.745	5.44433	5.94278	4.7135	4.90225	4.498
AQP7P3	4.53667	4.4546	4.19091	4.01405	4.10266	4.4724	4.66627	4.37587	4.06332	4.59138	4.06653	4.18686	4.19754	4.70853	4.33365	4.26905	4.39659	4.35262	4.12905	4.79484	3.96557	4.78908	5.35715	5.3335	5.6215	5.24971	5.68054	5.81833	5.31	5.49983	4.57712
AQP8	4.11817	4.19015	4.23084	4.3871	3.85706	4.35262	3.99427	4.26667	4.26659	4.01151	4.03063	4.35071	4.13843	4.24413	4.37841	4.38976	4.11048	4.29063	4.26753	4.25192	4.3731	4.35133	4.1015	4.184	4.13072	4.2155	4.0265	3.85029	3.9645	4.2165	3.895
AQP9	8.52687	8.3501	7.93246	7.02732	8.03587	7.55671	8.22	7.64869	7.72111	7.94167	7.91437	8.10643	7.83778	7.71746	7.74151	8.10786	7.45913	8.28595	7.48548	7.63843	7.78524	4.412	7.28233	5.38313	5.773	4.184	4.6515	5.71892	7.2705	4.609	7.402
AQR	5.68381	5.75835	5.65825	5.55754	5.81111	5.54224	5.66944	5.72056	5.71728	5.63468	5.69063	5.54119	5.56079	5.71553	5.661	5.79508	5.71373	5.81944	5.72512	5.72312	5.69381	5.66088	5.51608	5.91392	5.65337	5.537	5.6895	5.76715	5.5065	5.91825	5.60125
AR	5.6049	5.85627	6.58929	6.70619	6.33897	6.4381	6.39187	6.1219	6.62171	5.99389	6.53356	5.51738	6.6069	6.68082	6.73113	5.6181	6.16405	5.94476	6.22837	6.61944	6.04964	7.46425	6.5865	7.328	7.263	7.5935	7.22525	7.20142	6.5751	7.415	6.47858
ARAF	5.5711	5.24724	5.44532	5.44909	5.52798	5.67087	5.55087	5.43476	5.52347	5.39143	5.5902	5.49469	5.33831	5.56746	5.65657	5.6247	5.51865	5.25905	5.60831	5.60143	5.49056	5.70417	5.58333	6.03225	5.56017	5.61025	5.83333	5.66683	5.638	5.76337	5.48775
ARAFP2	9.23067	9.58071	8.46984	9.3771	9.19477	9.225	9.31254	9.33476	9.29762	8.94762	9.30917	9.77905	9.29976	9.21613	9.24048	9.66194	9.48964	9.47806	9.44929	9.48179	9.46762	9.2995	9.43967	9.4495	9.607	9.326	9.333	9.4795	9.47786	8.992	9.111
ARAP1	4.24198	4.45748	4.6681	4.71792	4.7194	4.68478	4.66627	4.95008	4.54797	4.73131	4.81685	4.91198	4.66952	4.74345	4.53202	5.12595	4.79468	4.33913	4.63683	4.55599	4.90071	4.44142	4.54525	4.5965	4.68583	4.745	4.96575	4.5735	4.57744	4.3195	4.75105
ARAP1-AS2	3.8681	3.77357	3.98224	3.95956	3.9954	3.96119	3.86571	4.06824	3.80452	4.09167	4.04095	3.9081	3.70286	4.00262	3.85167	3.93119	4.13079	4.13286	3.98113	3.91971	4.4269	4.012	3.832	4.00267	3.8735	4.1735	3.86177	4.0365	3.837	3.93933	3.922
ARAP2	6.32619	5.88736	5.89349	5.94569	6.03504	5.82522	5.93308	6.01907	5.76706	6.09595	6.01651	6.15944	5.96548	5.83349	5.77718	6.09595	5.74724	5.66827	5.36762	5.84121	6.38456	5.2785	5.85363	4.60617	5.5209	5.2192	5.00617	5.80154	5.7745	5.39092	5.611
ARAP3	6.86187	7.64296	7.49381	7.6323	7.29476	7.64472	7.2181	7.54605	7.51095	7.32976	7.29714	6.92655	7.44587	7.62821	7.75111	7.11702	7.58897	7.81758	7.2969	7.15256	7.55865	6.75175	7.07475	6.2135	7.06442	6.97583	7.218	7.1775	7.0615	6.8045	7.962
ARC	4.6481	3.93087	3.93119	3.92008	4.08079	4.22821	3.89714	4.09869	4.12952	4.03929	4.12024	4.39302	3.94603	4.2644	4.16742	4.14405	3.84048	4.03147	4.19893	3.89095	4.04867	4.088	4.0375	4.35333	4.41979	4.51033	4.452	4.23583	4.09575	4.52508	3.8755
ARCN1	6.75143	6.90992	7.00964	6.98278	6.83929	7.11508	6.93833	7.01595	7.11762	7.07214	6.80476	6.97417	6.98145	7.12746	7.07595	6.90381	6.96627	6.90667	6.98413	6.80746	6.99909	6.9745	7.2185	7.17467	7.01867	7.2515	7.184	7.0115	7.2185	7.21246	7.0455
AREG	6.69286	4.63397	4.49254	4.63881	4.27857	4.3104	4.21881	4.08393	4.26659	4.48877	4.23357	4.58415	4.06762	4.73063	5.05779	4.07929	3.9244	4.58841	4.40099	4.14532	5.44038	4.8975	7.31625	4.53725	5.221	5.03133	5.35633	5.37208	7.226	4.6975	4.63312
AREL1	5.51133	5.56698	5.68508	5.57532	5.56034	5.60675	5.65841	5.83521	5.57198	5.66306	5.58742	5.83433	5.78881	5.57143	5.51639	5.67004	5.68786	5.6173	5.49895	5.35222	5.42974	5.11825	5.42792	5.3335	5.33267	5.3295	5.47958	5.33567	5.38	5.17425	5.48775
ARF1	6.4473	6.37659	6.56802	6.77095	6.99647	7.09905	6.78627	6.93678	7.05115	7.04821	7.09095	6.95524	6.52762	6.91833	6.9731	7.25048	6.99472	6.14905	6.98413	7.1419	6.69024	6.37633	6.94383	7.1995	6.76363	6.9857	7.1905	7.09625	6.803	6.69	6.8295
ARF3	6.84119	6.77667	6.82548	6.83425	6.82836	6.87643	6.75179	6.80718	6.81008	6.86923	6.77857	6.95579	6.87429	6.84119	6.82213	6.67732	6.62171	6.72607	6.63802	6.71921	6.76183	6.70633	6.52983	6.67667	6.73275	6.97583	6.36617	6.797	6.39768	6.78283	6.6345
ARF4	8.76825	8.59317	8.45325	8.50833	8.6145	8.67873	8.30933	8.49738	8.71944	8.5503	8.57506	8.43004	8.44381	8.54606	8.58202	8.43754	8.34619	8.49857	8.68954	8.68675	8.33857	8.3545	8.5025	9.0645	8.612	8.5545	8.8245	8.73933	8.36892	8.6545	8.43125
ARF5	9.26409	9.5581	9.64948	9.63571	9.56258	9.43905	9.57452	9.53024	9.57345	9.44855	9.37595	9.39333	9.68976	9.44855	9.47119	9.35762	9.50405	9.5519	9.51512	9.2627	9.49214	9.874	9.28025	9.50284	9.349	9.367	9.5705	9.44379	9.343	9.3285	9.38933
ARF6	6.17004	6.31849	6.33881	6.30019	6.36984	6.31202	6.29629	6.29343	6.23996	6.40406	6.38794	6.28437	6.25167	6.33119	6.12581	6.48952	6.25413	6.31393	6.36563	6.39567	6.39393	5.73473	5.92133	6.553	6.075	6.12817	6.32475	6.15517	5.9105	6.4925	6.01992
ARFGAP1	8.0931	8.1919	7.99988	7.79248	7.76258	7.84456	7.86869	7.92317	7.84563	7.75111	7.86298	8.10004	7.92135	7.88639	7.98869	7.98452	7.9402	8.10937	7.83794	7.8481	7.82294	7.6955	7.86518	7.6325	7.4925	7.80883	7.716	7.536	7.7925	7.51375	7.9765
ARFGAP2	8.0602	8.25024	8.04722	7.995	8.22143	7.99833	7.91238	8.1204	7.98198	8.05238	8.09012	8.20417	8.09833	8.00012	8.16429	8.04786	8.04908	8.18738	7.96419	8.2244	8.04173	8.1655	7.8325	8.05686	7.9405	7.89933	8.02175	8.01667	7.7665	8.036	7.8875
ARFGEF1	5.41806	5.50833	5.48552	5.49651	5.57532	5.37357	5.38821	5.4854	5.44452	5.4981	5.35802	5.39154	5.41175	5.44578	5.47203	5.38143	5.42115	5.41496	5.47897	5.33616	5.23349	5.47683	5.3305	5.4555	5.3975	5.55142	5.3625	5.55567	5.38517	5.39092	5.484
ARFGEF2	6.20913	6.02413	6.08385	5.70405	5.92958	5.85337	5.90714	5.67881	5.96913	5.73925	5.87587	5.98595	5.9452	5.96379	5.86702	5.95385	5.75659	6.09103	5.8719	5.88032	5.7973	5.64494	5.63375	6.1045	5.773	5.695	6.0215	5.89667	5.64692	6.14075	5.82371
ARFGEF3	4.08079	4.05504	4.14099	3.95508	4.03956	4.12454	4.13861	3.99392	3.92552	4.03929	4.11516	3.96468	4.11837	4.04175	4.12881	4.13794	3.96825	3.96724	4.12107	3.97476	3.87825	4.017	4.08517	3.957	4.0875	4.11333	4.07217	4.1275	4.2045	4.13133	4.1305
ARFIP1	5.76187	5.91512	5.76706	6.00492	6.14011	6.07865	6.10474	6.08458	6.02413	6.05873	5.95755	6.01557	6.00071	5.88421	6.04119	6.04293	5.94099	5.8217	6.00683	6.0736	5.96321	6.0515	5.941	6.09012	6.014	5.87783	5.98633	6.10992	5.94	6.1195	5.94117
ARFIP2	6.87071	6.63698	6.09504	6.02508	6.23762	6.13083	6.06698	6.27233	6.19095	6.07587	6.2571	6.34823	6.12476	5.94569	6.29221	6.31107	6.1841	6.5781	6.3204	6.13028	6.30516	6.0215	6.4425	6.797	6.106	6.69	6.43367	6.1355	6.44996	6.369	6.285
ARFRP1	5.77254	5.75218	5.83589	5.77583	5.79821	5.8875	5.8169	5.87099	5.80849	5.79016	5.83274	6.03242	5.90821	5.78615	5.92627	5.95385	5.85258	5.86506	5.93868	5.94516	5.90893	5.78325	5.84092	5.95804	5.78662	5.9355	5.94483	5.785	5.85533	5.73904	5.76317
ARG1	4.0669	4.02667	3.89563	4.15167	3.94095	3.92806	3.81296	3.98254	3.83369	3.90137	3.83071	3.843	3.92143	4.04702	3.76312	3.58167	3.755	3.97786	3.73218	4.12065	3.6981	3.8385	4.256	3.641	3.8285	3.9165	3.71261	3.7955	4.25367	4.4021	3.78717
ARG2	5.5421	4.97779	4.74595	4.41619	4.61528	4.67641	5.03048	4.57845	4.52762	4.73131	4.90002	5.01373	4.77929	4.64694	4.76833	4.7302	4.75369	4.88063	4.50216	4.63683	4.27149	4.1655	4.58614	5.165	4.37046	4.828	5.176	4.524	4.53483	4.7235	4.55567
ARGFX	4.58984	4.58468	4.14099	4.46563	4.48579	4.45675	4.67421	4.65734	4.41262	4.4796	4.55482	4.83385	4.59374	4.45528	4.6548	4.80764	4.81619	4.65387	4.69819	4.67705	4.56103	4.472	4.4165	4.60617	4.5195	4.67533	4.41367	4.5015	4.451	4.65613	4.36627
ARGFXP2	4.43274	4.25968	4.18091	4.09952	4.24587	3.96119	4.2327	4.09869	4.11944	4.16157	4.26016	4.29905	4.45601	4.25442	4.07905	4.16611	4.25071	4.16659	4.11738	4.32952	3.90873	4.002	3.8115	4.184	4.12367	4.03567	3.8325	3.89735	3.942	3.61742	4.0525
ARGLU1	5.71536	6.10032	6.68022	6.53278	6.03917	6.27079	6.30821	6.66613	6.34246	6.3977	6.1052	6.26614	6.49897	6.45101	6.52633	6.05951	6.24782	6.28798	6.39609	6.05989	6.55286	7.012	6.8885	6.43285	6.54567	7.134	6.46283	6.58896	6.934	6.9685	7.0055
ARHGAP1	9.15944	9.67089	9.80738	10.2844	9.7621	10.0794	9.96944	9.84269	9.97381	9.94619	9.96212	9.68333	10.0165	10.1636	10.2208	9.67646	9.90619	9.65159	9.9569	10.1255	9.73357	9.6515	9.8715	10.285	9.98525	10.151	10.2273	10.1238	9.7795	10.0048	10.2655
ARHGAP10	6.5573	6.05024	6.51778	6.5089	6.45262	6.69502	6.54032	6.58402	6.67708	6.23821	6.46972	6.43238	6.48887	6.36238	6.57957	6.61528	6.6069	6.19201	6.68476	6.71276	6.3744	7.166	6.93283	7.4155	7.00171	7.6225	7.368	7.189	7.07725	7.0615	6.607
ARHGAP11A	4.03722	3.87865	3.81976	3.91313	4.03071	3.78443	3.89952	4.00429	4.04103	3.88005	3.90268	3.85528	3.9371	3.83325	3.82381	3.78905	3.82481	3.87206	4.20478	3.92317	3.75706	3.73724	3.952	3.9475	4.225	3.804	3.715	3.8155	3.7821	3.6995	3.9645
ARHGAP15	5.97498	5.63107	5.21056	5.71618	5.90845	5.6628	6.09788	5.92472	5.60681	5.82595	5.8544	5.88966	5.81348	5.83349	5.68484	5.94468	5.89466	5.60206	5.68369	5.80565	6.21135	5.19325	5.487	4.656	5.625	5.071	4.8495	5.656	5.694	4.8495	5.843
ARHGAP17	7.67024	7.2673	7.09294	6.985	7.18786	7.07778	7.23944	7.09927	7.15089	7.0604	7.21046	7.22593	7.20129	7.28071	7.04333	7.20306	7.13706	7.26952	6.97357	7.26095	7.0781	6.41492	6.89417	6.787	6.76363	7.08267	6.98467	6.85883	6.73667	7.226	6.7915
ARHGAP19	4.7344	4.78111	4.93117	4.90968	4.8181	4.85079	4.75401	4.94639	4.74397	4.92899	4.76691	4.93532	4.98155	4.815	4.83579	4.88968	4.85762	4.79349	4.80733	4.82048	4.85883	4.71133	4.73883	4.56117	4.76817	4.64567	4.61683	4.7095	4.69283	4.82317	4.89483
ARHGAP20	4.69058	4.61008	4.37	4.77762	4.54127	4.59216	4.46516	4.69151	4.65786	4.55579	4.53476	4.58845	4.46679	4.65627	4.6159	4.39976	4.75369	4.61683	4.42861	4.67705	4.52881	5.01133	4.20937	4.84017	4.795	4.88233	5.11267	4.90392	4.225	5.3625	4.4715
ARHGAP21	5.11873	4.90151	4.92397	4.89778	4.97981	4.85996	4.93984	4.95008	4.99238	5.03774	4.91349	4.81669	4.83932	5.09719	4.75167	4.85579	4.91845	4.9127	4.82106	4.815	4.76476	5.48917	5.00617	5.00758	4.8945	5.29542	5.05375	4.86167	4.97267	5.54267	4.95
ARHGAP22	8.15518	8.12262	8.03571	7.87095	7.77902	7.80423	7.7081	8.07786	7.77745	7.82476	7.98671	8.13333	8.01119	7.72845	7.84143	7.95921	8.10786	8.06897	8.25524	7.66754	7.69286	6.36825	7.2405	6.83975	7.00171	6.34933	6.9035	6.87925	7.236	6.70942	7.50725
ARHGAP23	4.26167	4.83932	4.79183	4.89919	4.48113	4.68016	4.68079	5.00381	4.6996	4.80035	4.50613	4.60929	4.8104	4.77762	4.97873	4.50603	4.63385	4.85898	4.71042	4.44357	4.70206	4.958	4.88967	5.17483	5.00617	5.28017	5.029	4.76633	4.79008	4.9135	5.17145
ARHGAP24	5.65873	5.2623	4.7681	4.77762	5.33508	5.13214	5.09175	5.06799	4.85433	5.55087	5.26833	5.53583	4.80539	5.11619	5.15131	5.2874	5.34301	5.29897	5.10347	5.43246	5.15432	4.452	4.54525	4.34142	4.82533	4.3655	4.53092	4.874	4.58933	4.34967	4.8075
ARHGAP25	8.52687	8.2056	7.87952	7.68214	7.9169	7.72905	8.07702	8.1319	7.83492	8.11071	7.86298	8.43004	8.1106	7.83	7.55107	8.06	7.96079	8.16405	7.72558	8.00071	8.24786	5.686	6.83333	5.3735	7.305	5.266	6.09942	7.2965	6.8785	5.3335	7.218
ARHGAP26	5.44687	5.45286	5.41921	5.55095	5.25563	5.27644	5.36762	5.49905	5.24698	5.6454	5.32075	5.61921	5.43913	5.28976	5.34956	5.51988	5.32591	5.4031	5.18111	5.58274	5.38954	5.36922	5.28979	4.84517	5.27792	5.04908	5.02437	5.244	5.2226	4.81583	5.1835
ARHGAP27	7.44524	7.61381	7.34595	7.27855	7.36929	7.24976	7.22198	7.52103	7.24076	7.40214	7.32508	7.6625	7.48933	7.34524	7.33444	7.35071	7.38167	7.50778	7.19603	7.43905	7.4219	6.17742	6.7745	5.946	6.64658	6.014	6.285	6.6365	6.58642	6.0355	7.18723
ARHGAP27P1	4.22042	4.04238	3.72349	4.03059	4.10266	3.85929	4.20508	4.11944	4.05815	4.0697	4.03063	4.17177	4.28786	4.02117	4.07905	4.64869	4.16968	4.09052	4.04238	4.02292	4.16645	4.1945	4.068	4.129	4.225	4.108	4.11642	3.972	4.3005	3.81433	4.121
ARHGAP27P2	4.68079	4.76877	4.81651	4.78825	4.86747	4.73179	4.75401	4.99942	4.81063	4.80906	4.80843	4.76619	4.84845	4.72492	4.85954	4.9396	4.82718	5.03227	5.02157	4.89079	5.01385	4.84775	4.72467	4.81299	4.8725	4.99438	4.6936	4.76633	4.976	4.78817	4.89075
ARHGAP28	3.97286	4.51619	3.957	4.41619	3.98262	4.10024	3.82548	4.11944	3.84283	4.16746	3.88016	3.99325	4.0502	4.03802	3.96877	3.94143	4.13528	4.45595	3.83143	3.93226	3.6671	3.942	3.9435	4.1145	4.23071	4.0525	4.13017	4.17183	4.0175	3.92917	4.361
ARHGAP29	3.98929	4.67964	4.55546	4.97792	4.25407	4.61376	4.5927	4.45714	4.53294	4.50922	4.42286	4.36205	4.0031	4.52827	4.55786	4.26316	4.81113	4.61196	4.53373	4.29682	4.7344	4.68017	4.776	4.523	4.58875	4.91492	4.61754	4.71825	4.616	5.01103	5.02715
ARHGAP29-AS1	3.73992	3.83913	3.88802	3.58643	3.81286	3.88841	3.88726	3.80273	3.84283	3.84262	3.86913	3.79077	3.87619	3.9434	3.62056	3.76238	3.64817	3.56226	3.5969	3.66452	3.9231	3.6815	3.9135	3.898	3.8735	3.7785	3.8125	3.761	3.659	3.6385	3.8755
ARHGAP30	6.61583	6.54444	6.62476	6.54276	6.73024	6.68778	6.6919	6.71641	6.64948	6.74016	6.72833	6.96988	6.83264	6.59714	6.5973	6.80381	6.7123	6.50438	6.65769	6.52659	6.82548	5.25417	5.80958	4.9135	5.863	5.01042	5.28533	5.83592	5.7805	4.4515	6.0735
ARHGAP31	5.72786	5.55302	5.42984	5.14698	5.37548	5.48891	5.26417	5.41263	5.3823	5.22171	5.62044	5.63706	5.36242	5.40385	5.4127	5.6604	5.39848	5.62881	5.49504	5.42298	5.57271	4.704	5.02175	5.1385	5.204	4.94983	5.2365	5.22925	5.1195	5.14675	5.3935
ARHGAP32	4.54611	4.39442	4.43198	4.62036	4.40762	4.37228	4.39659	4.45722	4.36901	4.48472	4.55032	4.37944	4.4969	4.44102	4.55873	4.44214	4.34325	4.50284	4.45075	4.41242	4.08579	4.77283	4.67467	4.80767	4.64267	4.98183	4.67837	4.51983	4.677	5.14333	4.69304
ARHGAP33	6.05873	6.23917	6.15623	5.97897	5.89754	5.93623	5.82984	5.92472	5.98793	5.89609	5.99365	6.09881	5.90748	5.87476	5.93556	6.01246	5.93024	6.1111	6.0469	5.99755	6.12778	6.116	6.12451	5.86217	6.131	6.26517	6.09233	6.04	6.02621	6.15675	5.839
ARHGAP35	5.08744	5.01808	5.33524	5.33052	5.36751	5.30175	5.35923	5.4031	5.5131	5.29786	5.35802	5.38669	5.47187	5.2796	5.32571	5.25228	5.34301	4.95262	5.46238	5.33616	5.29472	5.25871	5.23792	5.58079	5.29733	5.57933	5.428	5.34867	5.14654	5.109	5.39917
ARHGAP36	4.0765	3.79478	3.60452	3.74762	3.80444	3.67139	3.83849	3.9554	3.80452	3.61321	3.76258	3.63702	3.755	3.91548	3.85167	3.86833	3.57821	3.74548	3.82714	3.84157	3.6202	3.72233	3.725	3.8465	3.76475	3.95083	3.74967	3.79133	3.709	3.741	3.86592
ARHGAP39	4.19901	4.47754	4.57592	4.44397	4.82555	4.43729	4.41242	4.71214	4.49147	4.48877	4.38853	4.32979	4.52071	4.2644	4.39825	4.53179	4.41939	4.68063	4.88048	4.38905	4.53976	4.42093	4.3795	4.3765	4.38083	4.40491	4.61242	4.54133	4.649	4.4935	4.55567
ARHGAP4	9.71333	9.72729	9.65595	9.57119	9.57857	9.4931	9.48333	9.6981	9.4881	9.63786	9.56087	9.77905	9.65802	9.51292	9.6719	9.73357	9.68976	9.71595	9.61368	9.6719	9.71595	9.1495	9.3365	8.91133	9.40892	8.9875	9.2348	9.454	9.2885	8.7655	9.43725
ARHGAP40	4.34694	4.34937	4.42075	4.45079	4.26667	4.3104	4.21913	4.3927	4.43654	4.4838	4.29905	4.29	4.38796	4.10849	4.33484	4.49175	4.42508	4.59079	4.5969	4.32952	4.3696	4.53725	4.30342	4.35983	4.41979	4.6015	4.50517	4.33658	4.28867	4.61283	4.413
ARHGAP42	4.46623	4.69036	4.63194	4.83453	4.56833	4.77984	4.62807	4.90151	4.56464	4.79687	4.72631	4.58329	4.71798	4.84579	4.74345	4.60333	4.78274	4.74202	4.75647	4.81976	4.79798	4.8495	4.66772	4.93867	4.93975	5.02258	4.9215	4.83	4.716	4.862	5.12175
ARHGAP44	4.5469	5.10313	5.2331	5.4877	5.20452	5.66881	5.22944	5.0531	5.56143	5.18056	5.16651	4.68537	5.26683	5.55062	5.37754	4.86762	5.42504	5.1019	5.30512	5.42807	5.44933	5.38986	5.3015	5.03721	5.17288	5.53167	5.3416	5.50683	5.4865	5.50658	5.507
ARHGAP45	9.4154	9.51512	9.71464	9.63571	9.7844	9.45895	9.52265	9.82905	9.38857	9.65536	9.7621	9.815	9.87538	9.61048	9.52029	9.49119	9.59837	9.4579	9.52548	9.49571	9.74571	7.5145	8.97425	7.38367	8.997	7.86786	8.02175	8.99875	8.9425	7.26008	9.2445
ARHGAP5	5.37512	5.62587	6.01976	6.12476	5.98239	5.9323	6.10937	6.0552	5.89964	5.92534	5.9729	5.73207	6.00492	6.14063	6.07794	5.87409	5.95548	5.65617	6.02077	5.86552	5.88702	7.03017	6.39378	6.50467	6.24353	6.79473	6.36617	6.30823	6.38933	7.01425	6.37183
ARHGAP5-AS1	4.91758	4.82508	4.85539	5.04212	4.98987	4.86727	4.95906	4.77288	4.98786	4.81333	4.95429	4.76619	4.80119	5.30798	4.98813	4.90905	5.02957	4.85762	5.0119	5.05798	4.81063	5.312	5.10783	5.247	5.0495	5.07833	5.17375	5.05083	5.01267	5.3335	4.83325
ARHGAP6	4.55631	4.57462	4.83603	4.74091	4.9019	4.77135	4.72183	4.70143	4.63292	4.63292	4.71825	4.35071	4.76165	4.70381	4.71589	4.51627	4.67883	4.53817	4.78813	4.52964	4.35683	4.657	4.77021	4.91833	4.78433	5.00067	4.80758	4.685	4.81101	5.17925	4.71817
ARHGAP8	4.17857	3.75381	4.02271	3.56119	3.86825	4.00095	3.95611	3.99392	3.51524	3.7731	4.11024	4.32016	3.88548	3.82212	3.69845	4.05915	3.78252	3.63643	3.97266	4.04395	3.67833	3.6615	3.6865	3.85775	3.86375	3.617	3.86177	3.8012	3.80783	3.896	3.8755
ARHGAP9	8.08143	8.16229	7.4231	7.70226	7.80405	7.7169	7.7081	7.87341	7.52194	7.84484	7.69167	7.91	8.01119	7.70594	7.67	7.7352	7.74937	8.27452	7.76016	7.69429	8.0125	5.563	7.249	5.64608	6.79175	5.91188	6.07125	6.85883	7.236	5.705	7.18
ARHGDIA	8.02429	7.5196	7.46484	7.25155	7.435	7.54605	7.30024	7.46738	7.45464	7.40214	7.52351	7.67976	7.15917	7.51405	7.39794	7.7352	7.48643	7.50778	7.6501	7.51262	7.5369	6.617	7.36375	7.65517	7.0425	7.38583	7.48933	7.118	7.3585	6.89775	7.199
ARHGDIB	10.5951	10.4095	10.3278	10.3248	10.3948	10.2877	10.3786	10.4838	10.3547	10.4856	10.446	10.3215	10.4951	10.3804	10.3413	10.3804	10.5309	10.4921	10.2004	10.4648	10.6074	8.721	9.7455	8.876	9.7545	9.051	9.46825	9.7815	9.74508	9.0895	9.90175
ARHGDIG	3.9081	3.95143	3.9623	3.90993	3.78683	4.02	3.69048	3.80273	3.76667	3.82444	3.93891	3.93929	3.74571	3.58667	3.71119	3.82748	3.86913	3.7014	3.87825	3.80206	3.85476	3.97475	4.0005	3.941	3.80283	3.738	4.06583	3.8115	3.73877	3.886	3.8755
ARHGEF1	5.04246	5.19522	5.12413	5.1377	5.25603	5.10095	5.05722	5.20726	5.11405	5.08966	5.13704	5.13435	5.12325	4.9879	5.08582	5.162	5.13329	5.2031	5.23952	5.08952	4.8825	4.864	5.0025	4.97867	5.124	5.12327	5.13283	5.06963	5.143	4.80567	5.22842
ARHGEF10	5.49905	5.55302	5.74226	6.01105	5.64718	5.85909	5.62162	5.9206	5.87921	5.66306	5.78679	5.48877	5.69397	5.80653	5.98167	5.62881	5.76928	5.725	6.05802	5.77929	5.66996	6.25933	5.86825	6.06075	5.90644	6.16425	6.14075	5.70258	5.98292	5.88075	6.05892
ARHGEF10L	8.45381	8.57996	8.5569	8.5219	8.76595	8.4619	8.45325	8.58976	8.59349	8.47234	8.56929	8.41627	8.71516	8.53159	8.59433	8.44405	8.57222	8.58976	8.7255	8.62286	8.2919	9.051	8.61	8.96	8.433	9.33475	8.92717	8.58142	8.645	9.2344	8.6075
ARHGEF11	6.95518	5.99405	5.74762	5.46357	5.72524	5.60175	5.69951	5.50849	5.73944	5.45278	5.90907	5.99738	5.68892	5.75724	5.57683	6.01619	5.81536	6.0021	5.79833	5.78381	5.71813	5.289	5.16358	5.6855	5.24577	5.2545	5.44433	5.354	5.111	5.29367	5.27825
ARHGEF12	4.36095	4.34298	4.29071	4.45579	4.48579	4.45675	4.26063	4.48103	4.36281	4.2294	4.43637	4.17177	4.10905	4.61675	4.3881	4.09097	4.45079	4.44544	4.26753	4.36095	4.06841	4.6315	4.631	5.02092	4.442	4.91492	4.861	4.65633	4.61017	5.39923	4.59
ARHGEF15	6.3026	7.38056	6.02452	6.73804	6.14011	6.28385	6.05667	6.96758	6.14532	6.3929	6.13196	6.38517	6.38663	6.01325	6.34056	6.19656	6.37702	7.53008	6.33945	6.18675	6.34621	6.7095	6.3691	6.1655	6.40067	6.423	6.66033	6.41271	6.2425	6.369	6.73958
ARHGEF16	5.48079	4.80413	5.01786	4.73385	4.91238	5.1229	4.99183	4.66814	4.39467	4.81847	5.15202	5.02333	4.86647	4.6669	4.86913	4.87231	4.86636	4.80458	5.03103	4.79484	4.4173	3.931	4.442	4.24629	4.442	4.291	4.46175	4.30633	4.40883	4.29158	4.8495
ARHGEF17	8.00024	8.0619	8.69067	8.59391	8.29788	8.59433	8.34417	8.1204	8.55163	8.06107	8.3444	7.34548	8.39397	8.75619	8.80571	7.57619	8.23762	8.04173	8.35321	8.60143	7.9381	9.051	8.655	9.225	8.887	9.455	9.045	8.87575	8.65275	9.43725	8.6245
ARHGEF18	6.14032	6.03071	6.14967	6.19317	6.37485	6.20548	6.42255	6.20619	6.26405	7.03357	6.31869	6.43738	6.26778	6.11	6.21107	6.5669	6.28159	6.10496	6.18012	6.37478	6.14627	5.7835	5.88333	5.90328	5.86183	5.7365	5.85817	5.97242	5.76142	5.46167	5.73033
ARHGEF19	4.94385	5.05349	5.22722	4.94952	5.14127	5.25246	4.9675	4.79313	5.08044	5.12952	5.25298	4.76135	4.83341	4.86189	5.01976	4.7225	4.94071	5.172	5.03103	4.64927	4.95841	4.592	4.8075	4.78383	4.91007	4.715	4.97133	5.02	4.58933	4.279	4.91064
ARHGEF2	5.27004	5.50476	5.33052	5.83133	5.69377	5.62065	5.71149	5.61437	5.71496	5.7575	5.70405	5.87956	5.76667	5.84679	5.70735	5.79944	5.82571	5.59171	5.59921	5.55992	5.7669	5.23525	5.6955	5.79788	5.484	5.805	5.63817	5.4015	5.6955	5.57675	5.706
ARHGEF25	5.9156	5.80732	5.93095	5.95488	6.01333	6.01162	6.01512	5.53111	6.28988	5.73925	5.8973	5.32581	6.00071	6.14063	6.37722	5.27644	5.82571	5.67703	6.0469	6.14976	5.8419	7.2485	6.60675	6.87033	6.47	7.27242	6.804	6.6089	6.699	7.30783	6.392
ARHGEF26	5.58758	4.72845	5.93556	5.33556	6.01907	6.25584	5.45595	5.25088	6.04855	5.10667	5.89349	4.72714	5.35556	6.05145	5.80327	5.21173	5.01167	4.84183	5.86611	5.82243	4.85986	6.2518	6.33083	6.98633	6.28538	6.86917	6.9035	6.37042	6.346	6.42462	5.3935
ARHGEF28	4.49286	4.98114	5.3168	5.43786	5.01155	5.01429	5.18119	4.91883	5.17542	4.71062	4.99512	4.44357	5.1319	5.08333	5.07185	4.70056	4.84079	4.9594	5.09879	4.98452	4.69589	5.12221	5.01114	5.27417	5.193	5.28017	5.50475	5.156	4.95437	5.49029	5.2305
ARHGEF3-AS1	3.89817	3.82776	4.6273	4.81254	4.23563	4.37228	4.34889	4.73087	4.54797	4.72155	4.33913	4.43448	4.37214	4.18865	4.39825	4.81857	4.50917	4.05935	4.74294	4.25192	4.61905	4.6315	4.42567	4.50233	5.0015	4.6406	4.685	4.65633	4.70679	4.99438	4.7975
ARHGEF33	3.73992	3.73238	3.86656	3.76143	3.62992	3.93992	3.95611	3.98619	3.89119	3.82444	3.82103	3.93929	3.87619	4.19758	3.8614	3.74024	4.14002	3.77452	3.93159	3.82183	3.82702	3.847	3.90387	4.43075	3.76475	3.9165	3.8125	3.64217	3.9645	3.92917	3.7585
ARHGEF35	5.23071	5.33905	5.41024	4.84079	5.00452	4.89909	5.02127	5.42284	4.51925	4.85762	4.60333	4.6683	5.56079	4.93984	4.81012	4.01913	4.94071	5.37095	4.82106	4.47548	4.90071	5.1425	5.08867	5.0505	5.15983	5.45783	4.31042	4.9715	5.04028	4.92075	4.93
ARHGEF37	5.27004	5.58123	5.66204	5.84406	5.624	6.1106	5.73683	5.44063	5.86056	5.21222	5.78881	4.81471	5.65782	5.53915	5.661	5.09079	5.57532	5.42139	5.9431	5.79381	5.20651	5.64494	5.941	5.9	5.86183	5.9785	5.94937	5.969	5.89987	6.2408	5.81442
ARHGEF38	3.75405	3.74762	3.79853	3.77421	3.82556	3.8206	3.54333	3.92214	3.7316	3.67294	3.71749	3.843	3.92143	3.87998	3.75671	3.78738	3.66631	3.76452	3.75706	3.86762	4.03047	3.80983	3.70683	3.73225	3.712	3.738	3.866	3.765	3.7485	3.62729	3.8415
ARHGEF39	4.14302	3.95143	4.02992	3.92008	3.9954	4.06091	4.0381	3.93238	4.16847	4.10127	3.94865	4.16571	4.02841	4.06738	4.01254	4.02308	4.03175	3.87206	4.0281	4.05833	3.9619	4.1285	4.08577	4.024	4.096	4.195	4.062	4.0365	3.99012	4.28875	3.91
ARHGEF4	4.21653	4.25968	4.58599	4.20214	4.54762	4.84492	4.5827	4.14337	4.55853	4.33	4.70206	4.15008	4.35968	4.33524	4.68048	4.24815	4.13528	4.13944	4.62143	4.75127	4.57932	6.2085	4.861	4.9135	4.95775	5.45783	5.12908	5.02	4.758	5.44633	4.86738
ARHGEF40	8.24786	8.44333	8.32171	8.29528	8.31016	8.48873	8.39179	8.56287	8.22286	8.11071	8.32171	8.46333	8.52	8.50921	8.24821	8.53968	8.55516	8.38929	8.26508	8.44607	8.38167	8.1435	8.11617	8.1465	8.233	8.545	8.49	8.123	8.129	8.38125	8.729
ARHGEF5	5.2119	5.05925	4.99964	4.88143	4.94257	5.1229	4.9496	4.72226	5.01697	4.92163	4.9585	4.92	4.97833	5.06799	5.09187	4.81857	4.93156	4.99917	4.86968	4.90167	4.86636	5.563	5.06846	5.91933	5.10267	5.45783	5.4984	5.40717	5.061	5.7235	4.87733
ARHGEF6	5.18167	5.17226	5.35143	5.3753	5.56629	5.37921	5.1446	5.21214	5.33137	5.41532	5.32571	5.27621	5.34437	5.25757	5.39173	5.36984	5.47667	4.88944	5.4449	5.57035	5.27381	4.8175	4.984	4.90933	5.0215	4.89483	5.13283	5.326	5.061	5.12975	5.165
ARHGEF7	5.42766	5.42479	5.62587	5.80548	5.63018	5.52347	5.64214	5.54571	5.57271	5.5375	5.42175	5.34902	5.48579	5.65599	5.72849	5.46643	5.64032	5.49389	5.56302	5.59692	5.55825	5.82333	6.1755	5.997	5.7125	6.585	5.82421	5.73383	6.09575	6.052	5.98767
ARHGEF9	5.34626	5.42639	5.81903	5.74888	5.79985	5.68381	5.91998	5.47008	5.96379	5.49169	5.58742	5.32581	5.59476	5.80735	5.82742	5.42175	5.58198	5.32099	5.89369	5.72768	5.56679	6.52875	6.128	7.072	6.38427	6.65975	6.9685	6.381	6.13211	6.545	6.00157
ARID1A	6.60508	6.08554	5.58627	5.30968	5.55583	5.50865	5.27465	5.50849	5.56861	5.53082	5.63389	5.50619	5.56079	5.53915	5.67202	5.51988	5.45464	6.04321	5.6044	5.60675	5.65643	5.203	5.487	5.66633	5.18	5.67467	5.6445	5.43333	5.5101	5.57675	5.31617
ARID1B	5.43192	5.49341	5.61024	5.58234	5.42528	5.39409	5.49337	5.50456	5.43757	5.46444	5.3431	5.45464	5.57412	5.38742	5.45188	5.37369	5.43226	5.51855	5.44012	5.31401	5.47619	5.69367	5.68075	5.49488	5.52983	6.04025	5.50375	5.49275	5.67033	5.67508	5.49375
ARID2	5.35829	5.60994	5.46964	5.50266	5.63379	5.52702	5.45595	5.3499	5.34175	5.51371	5.51622	5.48333	5.42625	5.53915	5.68484	5.58941	5.505	5.38937	5.49504	5.63881	5.59496	5.6235	5.335	6.08575	5.68458	6.1603	5.89967	5.8135	5.39511	6.30958	5.695
ARID3A	6.5919	6.52214	6.41865	6.1404	6.45262	6.06724	6.32667	6.2281	6.23996	6.30627	6.39825	6.76024	6.38663	6.28915	6.15683	6.48952	6.27233	6.43119	6.17675	6.27021	6.09788	4.88917	5.756	5.13	5.615	5.59292	5.55042	5.75933	5.638	4.93085	5.93767
ARID3B	7.15012	7.01385	7.06397	6.88879	7.03976	7.03595	6.81103	7.02548	6.78437	7.0081	7.18024	7.1619	7.20129	6.89833	7.00952	6.89103	7.01595	6.93	6.84405	7.17234	7.0781	6.586	6.75188	6.9425	6.74808	7.263	6.79447	6.87925	6.671	6.65317	6.91517
ARID3C	4.04718	4.03171	3.76302	3.98163	3.79548	4.00095	4.01802	3.87817	3.95496	3.87535	3.89857	3.73146	3.9275	3.86532	3.79756	3.96381	3.82984	3.67786	3.815	3.77175	3.96557	3.8285	3.822	4.1495	3.794	4.022	3.9025	3.85977	3.885	3.792	3.8755
ARID4A	4.97689	5.13371	5.26175	5.02517	5.0339	5.11206	4.9106	5.20197	5.08044	5.18238	5.04952	5.17175	5.17349	5.08757	5.0444	4.7302	5.0404	5.15571	4.96379	4.82508	5.17361	5.38417	5.1925	5.17483	4.96067	5.324	4.99883	4.94779	5.175	5.7765	4.91064
ARID4B	4.89359	5.01808	5.07298	5.10393	5.15381	5.10095	5.03048	4.97347	5.0271	5.18056	5.07254	4.83722	4.89359	5.14294	5.25595	4.99543	5.07768	4.95262	4.95833	5.13629	5.27833	5.214	5.20658	5.143	4.96483	5.3415	5.08667	5.0145	5.25958	5.67508	5.24452
ARID5A	6.08952	5.96706	6.22992	6.09437	5.87702	6.05175	5.88548	5.83909	5.94652	5.99389	5.9431	6.02389	5.97095	5.86634	6.14198	5.99397	5.81778	5.9229	5.89521	5.86552	6.00437	6.7095	6.58383	6.72408	6.57863	7.54873	6.82167	6.45117	6.53033	6.37425	6.21254
ARID5B	5.80343	5.70694	5.72849	5.74748	5.6981	5.88476	5.5821	5.69877	5.73944	5.70655	5.61706	5.4231	5.68517	5.86575	5.95198	5.54349	5.71373	5.6944	5.79595	5.68667	5.8419	6.43308	6.617	6.47592	6.0215	6.77538	6.4925	6.16733	6.51375	6.5385	6.04996
ARIH1	5.78133	6.1169	6.35071	6.45563	6.27669	6.27952	6.39825	6.347	6.30437	6.17846	6.28218	6.30591	6.48282	6.34107	6.33631	6.33607	6.42151	6.17365	6.3204	6.25148	6.25667	6.68233	6.59175	6.315	6.5265	6.991	6.4445	6.34217	6.7015	6.5385	6.65079
ARIH2	7.98524	8.17611	8.2654	8.25667	8.17952	8.13643	8.17145	8.2377	8.12333	8.12214	8.17262	8.10921	8.21452	8.22048	8.2831	8.09333	8.15024	8.21143	8.13143	8.17145	8.15829	8.1795	8.1435	8.39933	7.96817	8.267	8.05825	8.02325	8.104	8.0185	8.24433
ARIH2OS	4.44218	4.41859	4.52567	4.4073	4.47563	4.45675	4.6159	4.51161	4.6279	4.4796	4.48837	4.08873	4.53024	4.46532	4.30857	4.4746	4.49	4.28099	4.38806	4.58889	4.53976	4.72533	4.43283	4.54454	4.72133	4.4335	4.44233	4.6445	4.369	4.6935	4.318
ARL1	7.52175	7.59952	7.78812	7.89956	7.86121	7.79476	7.64571	7.63984	7.93103	7.69294	7.73	7.52968	7.70333	7.85307	7.91	7.59709	7.58897	7.66825	7.77048	7.85895	7.55865	8.575	7.93342	8.37025	7.9405	8.24108	8.2225	8.05025	7.9545	8.102	7.735
ARL10	4.26167	4.26889	4.41619	4.46563	4.60341	4.55774	4.76349	4.48103	4.53911	4.61675	4.50613	4.42578	4.58496	4.70381	4.53202	4.51183	4.45079	4.2625	4.35542	4.36095	4.09976	4.62092	4.758	4.71575	4.452	4.839	4.5475	4.42117	4.50229	4.8975	4.60017
ARL11	4.27976	4.76877	4.89129	4.54817	4.69304	4.7423	4.73225	5.01937	4.68956	4.72155	4.53476	4.81471	5.00832	4.65627	4.45127	4.68607	4.70381	4.50683	4.52405	4.43069	4.56103	3.6045	4.20167	3.61183	4.0526	4.129	3.761	4.17496	4.262	3.61742	4.461
ARL13A	3.87667	3.74347	3.74425	3.80385	3.68432	3.82762	3.96472	3.56952	3.62393	3.79246	3.89857	3.81252	3.9371	3.55389	3.8081	3.77369	3.62857	3.52524	3.88918	3.71952	3.68738	3.69133	3.885	3.671	3.76475	3.52625	3.648	3.82917	3.79567	3.555	3.86592
ARL13B	4.71715	4.38945	4.54745	4.48782	4.45338	4.55774	4.52264	4.39877	4.46532	4.57582	4.47716	4.34008	4.33722	4.61675	4.50071	4.4746	4.4599	4.37623	4.45075	4.40854	4.46425	4.472	4.54525	4.83119	4.442	4.46763	4.59292	4.5015	4.49408	5.21408	4.38417
ARL14	3.88738	3.59857	3.7131	3.72683	3.96833	3.69435	3.97496	3.79052	3.83369	3.80397	3.94865	3.65573	3.85476	3.53786	3.78619	3.63333	3.6719	3.71224	3.80494	3.66452	3.63857	3.64567	3.875	3.866	3.95125	3.7575	3.659	3.771	3.7695	3.7205	3.7585
ARL14EP	6.48649	6.78226	6.29073	6.96533	7.10857	6.97357	6.99373	6.94802	6.995	6.98325	6.95524	6.74405	7.07913	7.09905	7.17833	6.89976	7.05429	6.86917	7.17857	7.0301	7.22879	7.6765	6.73142	7.0195	7.0845	6.67892	6.70633	7.118	6.8575	6.8155	6.8175
ARL14EPL	3.81836	3.61738	3.81405	3.64357	3.77556	3.84881	3.81921	3.75897	3.65077	3.59381	3.49738	3.79077	3.84611	3.90614	3.90381	3.70929	3.68841	3.75359	3.65762	3.72968	3.93097	3.7005	3.6985	3.76275	3.431	3.584	3.792	3.8115	3.659	3.6705	3.78717
ARL15	4.55218	4.52222	4.57592	4.69913	4.73095	4.50162	4.77288	4.84845	4.66806	4.68873	4.90802	4.87231	4.48988	4.7531	4.58206	4.66802	4.72468	4.48567	4.33857	4.61738	4.46425	4.36021	4.70617	4.4935	4.55625	4.72533	4.7135	4.61321	4.52508	4.9855	4.97725
ARL16	6.65452	7.03095	7.10524	6.99627	7.09837	7.12186	6.65738	6.82163	7.05115	6.67105	7.11198	7.0431	7.11	6.88929	6.84996	6.94302	7.06571	7.04016	6.92341	7.06103	6.53627	7.18	6.9935	7.26	7.0425	6.9857	6.96283	6.977	6.95325	7.10583	7.18
ARL17A	6.11484	6.47067	7.20984	6.79948	6.22763	6.65829	6.98032	7.07913	6.5531	6.5577	6.74911	6.74405	6.755	6.28317	6.62726	6.65437	6.75421	6.40821	6.57452	6.54122	6.61448	7.012	6.566	6.55983	6.689	6.6215	6.607	6.61942	6.6092	6.4315	6.90625
ARL2	7.5655	7.20325	7.20563	7.31262	7.19845	7.42393	7.36214	7.30595	7.27446	7.15024	7.42381	7.51131	7.20129	7.28071	7.48595	7.39738	7.46722	7.19806	7.59381	7.36262	7.31635	7.496	7.526	7.7435	7.51575	7.6715	7.7925	7.526	7.5745	7.69858	7.31975
ARL2BP	7.41242	7.3523	7.31738	7.48548	7.36929	7.39286	7.44595	7.38413	7.34992	7.26246	7.49381	7.46095	7.43262	7.32881	7.38897	7.45488	7.36952	7.4025	7.47504	7.48873	7.13905	7.18	7.1265	7.54807	7.40033	7.11883	7.51925	7.44317	7.0026	7.29858	7.2515
ARL2BPP2	3.9081	3.75381	3.85548	3.76143	3.74754	3.88841	3.76143	3.73748	3.70929	3.72825	3.68667	3.65573	3.61214	3.82212	3.55988	3.74024	3.84048	3.89	3.815	3.70929	3.98262	3.85767	3.673	4.00267	3.617	3.6395	4.0465	3.85977	3.85408	3.886	3.7675
ARL3	5.29679	5.4223	5.03885	5.36389	5.46259	5.45881	5.39154	5.31879	5.11167	5.015	5.37861	5.03317	5.3331	5.31421	5.23135	5.20429	5.38837	5.59171	5.57238	5.41294	5.01385	5.765	5.16358	5.62375	5.33592	5.695	5.3525	5.297	5.39511	5.65483	5.41729
ARL4A	6.07266	5.3575	5.65825	5.34744	5.50968	5.64929	5.42937	5.47583	5.46821	5.55087	5.42778	5.37849	5.26161	5.33063	5.62587	5.70925	5.3823	5.42417	5.4449	5.39848	5.62685	5.289	5.65052	5.70483	5.615	5.46317	5.50933	5.67317	5.6052	5.562	5.56817
ARL4C	9.48425	8.97651	8.58675	8.89605	9.05348	8.73329	9.12333	8.81563	8.33627	9.1444	8.89512	8.72167	8.8898	8.4781	8.66556	8.72167	9.03778	9.02357	8.78965	8.52526	9.21081	6.68908	8.855	5.9382	7.7685	7.53267	6.5855	7.839	8.9075	6.69	9.17
ARL4D	5.08143	5.01808	5.22135	4.73385	5.13224	5.57238	5.2019	5.01937	5.37357	5.00357	5.06226	4.97037	5.3331	5.31421	5.07185	5.18302	5.01683	5.01225	5.19069	5.1777	4.81063	5.666	5.50933	5.0505	5.41283	5.603	5.13283	5.0882	5.24112	5.6935	4.8395
ARL5A	6.24873	6.18067	6.61913	6.73	6.61726	6.54758	6.95548	6.62881	6.59024	6.56222	6.68476	6.77107	6.53765	6.71183	6.73113	6.53056	6.57827	6.25546	6.56929	6.65835	6.63984	7.26621	6.91175	7.4395	6.88175	7.03212	6.95429	6.92217	6.8395	7.43725	6.8855
ARL5B	4.74929	4.35262	4.59667	4.63881	4.52333	4.64024	4.63185	4.51161	4.51925	4.76176	4.58415	4.53806	4.557	4.68518	4.6159	4.46556	4.44091	4.32881	4.42861	4.55599	4.65968	4.8175	4.89242	4.89112	4.28	5.1925	4.66435	4.4515	4.6665	5.5545	4.5265
ARL5C	4.51565	4.12095	3.80397	4.17791	4.26667	4.23976	4.0381	4.13016	4.23763	4.10127	4.33913	4.17177	4.23452	4.18079	4.26909	4.38976	4.20867	4.32881	4.34606	4.22119	4.19881	4.1285	4.20167	4.4205	4.442	4.2355	4.40367	3.82917	4.13658	4.2165	4.17308
ARL6	4.19901	4.34298	4.60591	4.69913	4.40762	4.51312	4.46516	4.50071	4.49999	4.52925	4.51544	4.28161	4.36203	4.56183	4.43317	4.6273	4.54909	4.32881	4.58359	4.3402	4.4073	4.4905	4.33	4.58628	4.50167	4.41325	4.52117	4.3815	4.39933	4.76792	4.4715
ARL6IP1	6.49821	6.02413	6.22992	6.16913	6.43119	6.26617	6.32667	6.17934	6.25016	6.35369	6.39825	6.35849	5.92405	6.34107	6.07425	6.64984	6.36214	6.03226	6.25873	6.45167	6.25667	5.6545	5.834	5.733	6.0355	5.635	5.83333	6.1355	5.843	6.293	5.94825
ARL6IP4	8.38619	8.53238	8.42127	8.58032	8.56237	8.52	8.57996	8.5569	8.5555	8.4506	8.6171	8.50921	8.63339	8.54606	8.6956	8.66383	8.62024	8.47159	8.58893	8.56413	8.41849	9.1945	8.628	8.918	8.37167	8.795	8.88762	8.61	8.61	8.6545	8.49425
ARL6IP5	8.28262	8.2056	8.61563	8.69321	8.69194	8.54143	8.67063	8.55163	8.51873	8.57306	8.58315	8.43004	8.53238	8.49282	8.49003	8.56111	8.61286	8.34429	8.55333	8.52526	8.51357	8.61058	8.305	8.53042	8.6335	8.545	8.53875	8.63475	8.27433	8.816	8.49425
ARL8A	9.03095	8.69029	8.7654	8.80155	9.07143	8.94595	8.89476	8.78825	8.83627	8.88104	8.98236	8.99643	8.84438	8.74762	8.67873	8.99345	8.74881	8.63127	8.71647	8.7854	8.56111	7.999	8.422	8.50938	8.56375	8.5545	8.5535	8.707	8.453	8.2145	8.43125
ARL8B	6.83683	6.65929	6.81333	6.63847	6.86671	6.72	6.87179	6.78944	6.8644	6.68438	6.8156	6.94357	6.71702	6.82119	6.53264	6.98627	6.80214	6.60952	6.6496	6.73571	6.51651	6.4225	6.57442	6.40933	6.3405	6.365	6.482	6.40275	6.5751	6.65317	6.4945
ARL9	4.39008	4.38048	4.21238	4.45579	4.2976	4.47694	3.98429	4.27852	4.49999	4.4996	4.36932	4.42578	4.65873	4.60433	4.41619	4.24815	4.49984	4.27091	4.28857	4.47548	4.33976	4.7365	4.49225	4.523	4.41979	4.45667	5.01602	4.62312	4.4855	4.704	4.4715
ARMC10	6.79841	6.67865	6.87833	6.92298	6.91056	6.9219	6.9123	6.82421	6.995	6.81	6.97143	6.96405	6.62325	6.83087	6.84996	7.03155	6.81754	6.66375	6.9123	7.02484	6.69024	7.10017	6.74933	7.11883	6.9535	6.74042	7.03433	6.93817	6.64967	6.96633	6.72917
ARMC12	3.74754	3.81671	3.97246	3.94063	3.8881	3.86889	4.01802	3.74623	4.10905	4.0697	3.94865	4.04722	3.99381	4.16	4.18825	3.68714	4.29905	3.76452	3.83857	4.16302	3.78738	3.82	3.89375	4.03578	3.90352	3.895	4.1275	4.1275	3.922	3.93933	3.982
ARMC2	4.30405	4.16095	4.29591	4.26946	4.07734	4.21717	4.16129	4.22762	4.15911	4.18897	4.26631	4.20643	4.38881	4.33762	4.08244	4.15619	4.17468	4.16099	4.32048	4.25786	4.01143	4.1625	4.23192	4.038	4.23542	4.158	4.19825	4.13417	4.33917	4.27479	4.03313
ARMC3	3.71437	3.82776	3.69845	3.72683	3.77032	3.72927	3.85222	3.77302	3.77508	3.77714	3.74433	3.71563	3.83542	3.70963	3.80341	3.80087	3.79625	3.8773	3.66167	3.80206	3.73921	3.80983	3.78067	4.12483	3.75067	3.81067	3.75517	3.67383	3.7485	3.95	3.76133
ARMC4	3.91786	3.86833	3.95853	3.88881	3.96298	4.14119	4.00278	3.73748	4.00095	3.78897	3.86913	3.73146	3.8273	3.95413	4.01254	3.66452	4.38481	3.75878	3.95508	4.0619	4.08449	3.761	4.06417	3.837	3.823	4.083	3.892	3.99117	3.7725	3.9025	3.81695
ARMC5	7.08853	7.5196	7.35619	7.46417	7.24008	7.34468	7.26095	7.44631	7.31623	7.30329	7.25155	7.29583	7.44587	7.26143	7.33786	7.2881	7.33079	7.48548	7.22115	7.31389	7.24048	7.155	6.93283	7.2215	7.33	7.19125	7.2415	7.23683	6.9297	7.12767	7.218
ARMC6	6.5669	6.59472	6.26125	6.44387	6.23762	6.37881	6.30821	6.57452	6.40754	6.43278	6.45821	6.6623	6.20833	6.29956	6.47095	6.69369	6.49956	6.71641	6.68476	6.43028	6.62889	6.075	6.128	6.50113	6.43975	6.1875	6.62917	6.323	6.31983	5.93	6.3407
ARMC7	6.33698	6.36433	6.10524	5.8556	5.90845	6.10016	6.04619	6.01907	6.08266	5.88464	6.14071	6.34823	6.25167	5.98296	5.93837	6.16746	6.20149	6.25546	5.93321	6.18675	6.09788	4.83558	5.557	5.25267	5.56017	5.0365	5.3525	5.375	5.656	5.13825	5.54875
ARMC8	6.035	6.13771	6.22582	6.35643	6.28159	6.26989	6.26348	6.27952	6.18651	6.21429	6.25167	6.16845	6.16746	6.15714	6.27444	6.2871	6.21706	6.14905	6.19111	6.2463	6.13884	6.482	6.47197	6.73133	6.5225	6.46483	6.59829	6.5155	6.454	6.41317	6.26108
ARMC9	6.59905	6.22806	6.24381	6.27994	6.30008	6.4256	6.4881	6.21488	6.56222	6.25302	6.12252	6.29929	6.57675	6.51841	6.00659	6.27492	6.37254	6.2634	6.71472	6.24094	6.57743	5.1455	6.54867	5.656	5.93	6.2258	6.066	5.847	6.5355	6.25338	6.42817
ARMCX1	7.5655	7.3619	7.72008	7.65762	7.84063	7.70476	7.64571	7.46738	7.74976	7.5269	7.72008	7.42464	7.26095	7.6819	7.6019	7.57619	7.58897	7.29734	7.69214	7.77357	7.52571	8.575	7.54704	8.12	7.81262	8.01608	7.9845	7.839	7.53567	8.4995	7.60783
ARMCX2	6.58615	6.89611	7.52524	7.52274	7.47571	7.49381	7.45401	7.19758	7.5473	7.49548	7.30988	6.91484	7.08885	7.37345	7.47611	7.17056	7.36952	6.98488	7.47504	7.67956	7.20476	7.8075	7.3085	7.56067	7.5835	7.523	7.404	7.6145	7.143	7.7255	7.49725
ARMCX3	5.7669	5.50833	5.70811	5.43226	5.57532	5.409	5.71735	5.41263	5.60681	5.49169	5.53403	5.31833	5.56992	5.34476	5.34147	5.44581	5.5252	5.58274	5.6044	5.5869	5.72964	5.666	5.487	5.70483	5.74283	5.4385	5.74417	5.52463	5.417	5.75632	5.31617
ARMCX3-AS1	4.13685	4.13155	4.20327	4.1881	4.17643	4.09536	4.01802	3.9554	3.95496	3.99214	4.24994	3.82183	4.19754	4.41754	4.36008	4.04889	4.16968	4.01151	4.00252	4.40854	3.87825	4.50967	4.686	4.9904	4.351	5.27683	4.50158	4.3425	4.46	5.57675	4.53767
ARMCX4	4.259	4.3305	4.47932	4.4816	4.34996	4.42242	4.35363	4.34584	4.4189	4.4073	4.39116	4.43771	4.47363	4.49106	4.46575	4.51838	4.41544	4.36738	4.38231	4.46256	4.28814	4.72173	4.4165	4.5805	4.46473	4.78277	4.6887	4.524	4.5083	4.6975	4.6236
ARMCX5	5.87634	6.05024	6.01333	6.19905	6.31682	6.18365	6.09788	6.07802	6.16754	6.08667	6.22643	5.98595	5.95492	6.0556	6.23836	6.30187	6.06349	6.02167	6.0823	6.18675	5.92768	6.502	5.941	6.39383	6.106	6.08533	6.1807	6.34217	5.88867	6.5385	6.02835
ARMCX6	5.19151	5.09153	4.92817	5.43226	5.57532	5.60175	5.8673	5.53111	5.74929	5.42345	5.57359	5.60548	5.32365	5.6373	5.62929	5.82839	5.70027	5.28718	5.4449	5.6746	5.4448	5.47283	5.28979	5.5045	5.193	5.316	5.3725	4.9715	5.35414	5.39092	5.40467
ARMH1	5.37968	5.56107	5.20071	5.03452	4.99579	4.87555	4.99183	5.10667	5.10302	5.32373	5.11188	5.30742	5.10214	5.2031	5.0531	5.11569	4.81619	5.42139	4.93103	5.03937	5.18302	4.52093	4.77952	4.4825	4.763	4.3195	4.72367	4.592	4.65825	5.3335	4.89983
ARMH3	6.6274	6.34694	6.26125	6.26992	6.31682	6.29629	6.3431	6.347	6.155	6.225	6.38794	6.43821	6.30538	6.21837	6.18848	6.46278	6.2977	6.29271	6.39609	6.36433	6.26917	6.078	6.39533	6.3188	6.358	6.2115	6.25173	6.09567	6.32767	6.16167	6.1845
ARMH4	4.58984	4.58468	4.72226	4.88776	4.64871	4.75216	4.58696	4.73379	4.7681	4.73595	4.70206	4.32381	4.75676	4.94617	4.53891	4.60333	4.75875	4.80458	4.8945	4.60762	4.33427	5.55792	5.08867	5.81757	5.14483	5.62058	5.68054	5.37208	5.061	5.7465	5.0755
ARMS2	3.81836	3.8056	3.6719	3.71607	3.62992	3.96119	3.85548	3.80273	3.92552	3.82444	3.92058	4.00397	3.79919	3.74992	3.77437	3.85825	3.50714	3.98262	3.84948	3.72968	3.82702	3.9035	3.7845	4.56517	3.699	3.8515	3.9745	3.771	3.80783	4.236	4.0235
ARMT1	5.45286	5.56698	5.59125	5.68786	5.415	5.4746	5.50938	5.60206	5.49675	5.62238	5.44306	5.63706	5.57532	5.63212	5.51909	5.6181	5.49325	5.48145	5.49944	5.42807	5.36806	5.26683	5.16833	5.28	5.252	4.9195	5.3416	5.33567	5.20133	5.236	5.30408
ARNT	5.31648	5.33905	5.19052	5.44452	5.46259	5.36754	5.32758	5.54119	5.42611	5.29337	5.43238	5.41321	5.77248	5.41442	5.37183	5.22442	5.33222	5.34734	5.51643	5.18897	5.24776	5.63312	5.46892	5.6765	5.3465	5.753	5.42387	5.297	5.714	5.3025	5.5595
ARNT2	4.52095	4.7606	4.37347	4.87488	4.48579	4.57571	4.37881	4.81476	4.57071	4.64869	4.8044	4.69027	4.83341	4.67079	4.65018	4.8249	4.49984	4.68579	4.79748	4.49286	4.45714	4.60467	4.50121	5.00571	4.61258	4.5755	4.50417	4.55158	4.55265	4.9135	4.71817
ARNTL	4.18917	4.25071	4.37	4.44397	4.1322	4.12454	4.435	4.27852	4.19929	4.50922	4.32016	4.41524	4.36203	4.03802	4.16742	4.18667	4.38913	4.2994	4.37659	4.12525	4.5506	4.184	4.60346	4.268	4.59933	4.3655	4.078	4.5015	4.7648	4.1565	4.547
ARNTL2	5.24111	5.44306	5.36389	5.40262	5.30611	5.43159	5.446	5.62929	5.63629	5.56981	5.26833	5.46181	5.48143	5.28419	5.35369	5.43238	5.43589	5.53522	5.6044	5.09297	5.32373	4.98271	5.6125	5.8235	5.3725	5.38305	5.22775	5.34475	5.638	5.51617	5.40467
ARPC1B	7.51202	8.00921	8.58675	8.55333	8.63921	8.66929	8.79794	8.67815	8.66325	8.72963	8.61357	8.93556	8.5646	8.65607	8.53198	8.90405	8.84226	8.03413	8.57653	8.61993	8.85476	7.48592	8.0315	8.016	8.2515	7.294	8.15	8.339	8.072	6.92967	8.53133
ARPC2	8.93702	8.92198	8.51873	8.66556	8.80787	8.67873	8.58893	8.69692	8.71214	8.64321	8.82101	8.7654	8.69357	8.72774	8.75619	8.76595	8.62605	8.8754	8.65351	8.75462	8.5531	8.2205	8.2825	8.6445	8.3185	8.25383	8.5865	8.40883	8.1925	8.348	8.313
ARPC3	9.77093	9.94524	9.94619	9.94524	10.0043	9.77093	9.89206	10.0849	9.85214	10.1394	9.97583	9.87849	9.94429	9.86452	9.69143	9.99694	9.92694	9.97925	9.93298	9.88571	10.1052	9.17833	9.3265	9.289	9.397	8.852	9.256	9.4925	9.3705	9.13783	9.643
ARPC4	6.0469	5.60994	5.81903	5.74401	5.82437	5.81556	5.90714	5.64821	5.80522	4.80906	5.97857	5.9073	5.70925	5.70603	5.69619	6.09595	5.85623	5.6981	5.7669	5.82832	5.67504	5.1815	5.53779	5.9382	5.634	5.42883	5.8525	5.66683	5.5305	5.47483	5.34733
ARPC5	8.73405	8.66238	9.00151	8.56111	8.76746	8.65738	8.1704	8.72963	8.06563	8.64468	8.67238	8.92065	8.79794	8.24563	8.66078	8.02258	8.59391	8.66929	8.14302	8.48111	8.08052	8.22925	7.82967	8.42813	8.44008	8.20317	8.35583	8.4475	7.818	8.20783	8.61383
ARPC5L	6.95518	7.14016	7.47532	7.43238	7.21742	7.27548	7.26095	7.32929	7.30754	7.47591	7.23008	7.15	6.83024	7.28071	7.26143	7.27048	7.11151	7.08565	7.22115	7.0301	7.42476	6.69925	7.44175	7.36658	7.437	6.97583	7.002	7.33917	7.369	6.55692	7.0815
ARPIN	7.02321	6.19032	6.46937	6.35167	6.50063	6.45627	6.34841	6.44037	6.30048	6.8046	6.37761	6.88115	6.5669	6.28915	6.22925	6.64107	6.40048	6.16762	6.23788	6.60111	6.36468	5.969	6.11075	6.0465	6.26371	5.9785	5.92092	6.0165	5.99817	5.7465	6.086
ARPP19	6.94492	6.52697	6.56802	6.60595	6.87619	6.73889	6.68333	6.65956	6.75167	6.67105	6.70619	6.68391	6.42024	6.78771	6.64363	6.82976	6.76817	6.51381	6.66968	6.84833	6.65409	7.06275	6.6265	7.0415	6.617	6.9495	6.91775	6.7505	6.596	7.21075	6.61117
ARPP21	3.87667	3.88603	4.32746	3.97405	4.07734	3.85548	4.32921	3.81381	4.08079	3.7131	4.3527	4.15008	3.89987	3.76143	3.8614	3.9154	3.84048	3.7804	3.89952	4.04395	3.88254	3.77582	3.9785	5.10892	4.012	3.68967	5.24267	4.14658	4.05992	4.18525	4.16683
ARR3	4.13685	3.7129	4.01286	3.88881	3.68432	4.04744	3.80198	3.84792	3.91363	3.5781	4.05065	3.93929	3.84611	3.85463	3.96286	4.15619	4.02167	3.95115	4.08403	3.88155	3.85476	3.711	3.875	4.024	3.90352	3.83933	4.088	3.99117	3.8645	3.97025	3.941
ARRB1	6.33698	5.828	6.13929	5.88675	5.98239	6.12143	6.13952	6.07802	5.96913	6.24833	6.18639	6.63917	5.72768	5.92476	6.00109	6.47055	6.29143	5.80565	6.00683	6.13028	6.24516	4.91992	5.52041	4.804	5.56017	5.00533	5.18483	5.71892	5.417	4.62846	5.853
ARRB2	9.56087	9.27849	8.18994	8.5219	8.94857	8.70238	8.76917	8.88496	8.4731	8.76905	8.87151	9.16611	8.9131	8.71048	8.62151	8.98417	8.88104	9.1881	8.86091	8.74327	9.14262	7.2205	8.3985	6.9635	8.1625	7.19125	7.55283	8.0675	8.481	6.77908	8.313
ARRDC1	7.22865	6.59472	6.47671	6.20869	6.535	6.44662	6.49897	6.62024	6.4419	6.25762	6.55226	6.67385	6.47538	6.41643	6.31817	6.75119	6.6069	6.7002	6.55881	6.38627	6.53627	6.014	6.06992	5.53779	6.1845	5.91188	6.11667	6.0505	6.11383	5.46167	6.285
ARRDC1-AS1	4.85214	4.77824	4.93821	4.8006	4.81333	4.80202	5.00141	4.9127	4.9396	4.83722	4.91987	4.9306	4.70563	4.78111	4.85048	5.02667	5.0074	4.90714	4.84063	4.93119	4.75381	5.00183	4.89242	4.91833	4.732	5.0365	5.10213	4.8175	5.0315	4.8975	4.8075
ARRDC2	6.90071	6.80381	7.15901	7.11579	7.18786	7.29476	6.93405	7.22468	7.09633	7.12333	7.30988	7.20774	6.88859	7.05512	7.31738	7.09794	7.21817	6.75585	7.18813	7.11456	7.09738	7.073	7.61775	6.83975	7.222	6.86917	6.8675	7.27583	7.6795	6.8155	7.0985
ARRDC3	6.28131	5.95205	5.41921	5.81552	5.56629	5.25246	5.63801	5.47008	5.19224	5.61716	5.63389	5.35444	5.47187	5.50778	5.14127	5.60722	5.99488	6.24643	5.3227	5.43246	5.56119	5.931	5.88333	4.9715	5.204	6.105	4.96575	5.239	6.052	6.607	5.48775
ARRDC3-AS1	3.56024	3.8481	3.89873	3.74	3.79548	3.84881	3.54333	3.64246	3.77508	3.60214	4.20746	3.91786	3.68714	3.77115	3.52238	3.68714	3.74103	3.60476	3.71119	3.62218	4.0204	3.6815	3.725	3.79387	3.73567	3.78917	3.709	4.225	3.79567	3.588	3.73933
ARRDC4	6.99726	7.48643	7.03381	7.50472	7.4131	7.13357	7.0846	7.58897	7.25861	7.45762	7.1619	7.2473	7.66714	7.12746	6.86869	7.40556	7.34325	7.29734	7.31548	7.25171	7.06667	6.116	6.47197	5.9785	6.40067	5.8625	6.014	6.381	6.393	6.094	6.89629
ARRDC5	4.57175	4.41859	4.50373	4.49971	4.65531	4.44724	4.57786	4.52242	4.31373	4.38921	4.6325	4.7225	4.43413	4.44421	4.44184	4.69675	4.67544	4.18659	4.36512	4.62675	4.57932	3.894	4.461	3.804	4.13072	3.726	3.95438	4.401	4.3005	3.7315	4.28817
ARSA	9.12333	8.78353	8.91952	8.63258	8.65095	9.16345	9.40548	9.27762	9.36528	8.66383	9.03679	9.2225	9.51619	9.24951	9.12393	9.26992	9.41722	8.76484	9.25151	9.2175	9.26849	8.3155	8.8925	8.22317	8.9465	8.3475	8.8325	8.72	9.03375	8.1295	9.00883
ARSB	5.92619	5.5723	5.62587	5.66024	5.50619	5.62708	5.72603	5.57683	5.7869	5.6696	5.64526	5.94646	5.96548	5.56119	5.35369	5.77202	5.7177	5.49389	5.35782	5.64778	5.62685	4.13792	5.39842	4.83119	5.216	5.09372	5.08092	5.048	5.264	4.609	5.165
ARSD	5.76023	5.59413	5.63468	5.40881	5.34175	5.41286	5.49337	5.51429	5.31115	5.70516	5.68119	5.56034	5.3904	5.75218	5.54786	5.64675	5.44071	5.61794	5.57925	5.6746	5.43861	5.51583	5.28979	5.67404	5.41283	5.13283	5.40933	5.44317	5.22633	5.45683	5.33267
ARSE	4.09696	4.28619	3.90952	3.85603	4.02464	4.21717	3.88726	4.10893	4.12952	3.69688	4.19861	3.843	4.10905	4.30988	3.77437	3.90952	3.84048	4.13286	4.06393	4.16302	3.70286	3.865	4.31	4.03578	4.12367	4.35208	4.088	3.931	4.0655	4.03883	4.2775
ARSEP1	3.64964	3.42048	3.77339	3.74762	3.80444	3.78443	3.71151	3.91048	3.87317	3.96008	3.74433	3.93929	3.78198	3.64601	3.7419	3.78365	3.85071	3.96272	3.82714	3.72968	3.94849	3.7805	3.832	3.79387	3.80283	3.78917	3.5665	3.699	3.837	3.782	3.775
ARSF	4.02667	4.15167	3.89873	3.98163	3.69405	3.81607	3.73095	4.00429	3.94505	3.88714	3.81131	3.99325	3.99381	3.85463	3.91397	3.97532	3.93024	4.13286	4.17648	4.23289	3.7419	3.6615	3.8645	4.0875	3.8525	3.6685	3.82217	3.90798	3.8265	4.11883	4.04158
ARSG	5.56119	5.17649	5.25464	5.05159	5.00984	5.01429	5.1446	4.99452	5.14286	4.9927	4.99643	5.16552	4.93202	4.96024	5.07824	5.06383	5.26492	5.19532	5.12115	4.98956	5.3291	4.7365	4.97981	4.8275	4.9307	4.69887	4.76562	5.04213	4.93833	4.675	4.85983
ARSH	3.78905	3.74347	3.85548	3.98163	3.59083	3.77333	3.83849	3.67214	3.54714	3.65452	3.75333	3.69254	3.71119	3.74992	3.69845	3.71952	3.88905	3.97333	3.7631	3.85167	3.70286	4.23475	3.673	3.8245	3.8525	3.6475	3.8435	3.771	3.885	3.711	3.7585
ARSI	4.17857	4.44123	4.29964	4.16795	4.02464	4.3104	3.99427	4.14921	4.24742	4.20377	3.99214	4.06873	4.19754	4.34098	4.30857	4.24815	4.20867	4.48567	4.21881	4.3402	3.83333	4.0375	4.27183	4.8595	4.341	4.195	4.42317	4.08767	4.3415	4.3195	4.38417
ARSJ	3.77875	3.95143	3.82381	3.9921	3.96833	3.82762	4.79913	3.99392	4.07781	3.89833	4.05968	3.74303	3.86635	3.9831	4.01254	3.94143	3.99143	3.74548	3.84948	4.1181	3.86244	3.9135	4.23192	4.849	3.9315	3.97938	4.372	4.164	4.25367	4.3895	3.85533
ARSK	4.79808	4.47754	4.57952	4.47655	4.49567	4.61786	4.73764	4.51161	4.6526	4.57582	4.60024	4.51008	4.3821	4.69036	4.42576	4.47152	4.37083	4.55071	4.61738	4.49971	4.80119	4.556	4.58614	4.611	4.341	4.5195	4.505	4.52167	4.541	4.8835	4.39
ART1	3.72	3.83913	3.86656	3.82381	3.90627	3.85929	3.86571	3.85825	3.98425	3.88714	3.86913	3.98212	3.91585	4.55302	3.8614	3.80488	3.8031	3.72278	3.98113	3.87262	3.79413	3.771	3.773	3.68955	3.7735	3.87333	3.8125	3.761	3.942	3.761	3.699
ART3	3.66968	3.70286	3.70315	3.68714	3.72881	3.74643	3.69048	3.54548	3.77508	3.67905	3.69476	3.77889	3.86635	3.82212	3.78619	3.72992	3.99143	3.71224	3.78476	3.71952	3.81135	3.72233	3.673	3.753	3.7085	3.7575	3.892	3.921	3.81783	3.84479	3.826
ART4	5.09214	4.69352	5.57359	5.47216	5.49337	6.08868	5.5281	5.54119	6.155	5.29337	5.67861	4.97037	5.96548	5.56119	5.83764	4.87231	5.5252	4.92746	5.55349	5.2849	5.64683	5.64494	5.756	5.02092	5.733	5.38305	5.54033	5.83592	5.80492	5.3525	5.27825
ART5	3.98929	4.12897	3.98563	4.1331	3.85706	4.04296	3.97496	4.09215	4.06332	4.00397	4.11649	4.06873	4.01746	4.15058	4.17708	4.22286	4.06533	4.07032	3.98496	3.96155	3.88937	3.95	4.03433	4.18933	4.24867	4.2995	4.3415	4.279	3.83195	4.32383	4.1535
ARV1	6.77742	6.62786	6.47671	6.5577	6.5879	6.55599	6.90726	6.46167	6.62171	6.56222	6.61933	6.44581	6.54846	6.71183	6.46152	6.63198	6.6069	6.65323	6.70938	6.61944	6.52587	6.8525	6.10139	6.553	6.37942	5.84101	6.541	6.41271	6.2425	6.576	6.46717
ARVCF	4.48929	4.59003	5.16427	5.10393	5.16073	5.26508	5.2019	4.66262	5.38918	4.97825	5.39101	4.78274	5.12381	5.00141	5.33095	4.84162	5.07169	4.62632	5.29933	4.815	4.70349	5.11217	5.557	6.116	5.634	5.753	5.8045	5.62921	5.38	5.43183	5.0755
ARX	4.27976	4.0825	3.98224	4.15873	4.14369	4.03889	4.09773	4.19754	4.229	3.99214	4.27976	4.10833	3.9854	3.90614	4.04238	4.05915	4.09976	4.20643	3.86833	4.73079	4.09976	3.9135	4.04754	4.0555	4.02267	4.2355	4.0165	4.08767	4.0455	4.129	4.03313
AS3MT	8.15518	8.24667	8.28667	8.43468	8.07579	8.40762	8.24786	8.13556	8.29333	8.33893	8.3444	8.10004	8.3219	8.51718	8.36181	8.08187	8.23762	8.24452	8.45655	8.15443	8.18881	8.16	8.095	8.291	8.137	8.1675	8.32375	8.1525	8.04	8.4075	8.4095
ASAH1	10.1477	9.65802	10.02	9.58393	10.217	9.93731	10.3607	9.9225	9.94429	9.83095	10.2812	10.498	9.87538	10.0129	9.51071	10.4325	10.1795	9.62643	9.91095	10.1464	9.77093	8.95525	9.37283	8.52017	9.541	8.6775	8.791	9.53175	9.35642	8.8535	9.55467
ASAP1	6.68341	6.09567	5.97135	5.83512	5.98239	5.95286	5.87702	5.96421	6.095	5.70037	5.97857	6.09595	6.18365	6.08452	5.78849	6.12341	5.9054	6.1111	5.83173	5.68312	4.65968	4.67533	5.52041	5.09187	5.2675	5.1925	5.0915	5.587	5.49175	5.17925	5.52783
ASAP1-IT1	6.3026	6.64542	6.88349	6.69794	6.6071	6.69502	6.63638	6.90381	6.62171	6.69508	6.51032	6.79325	7.05833	6.77714	6.56841	6.86286	6.81333	6.73706	6.60306	6.44138	6.63984	6.03217	6.245	5.46413	6.25262	5.901	5.89967	6.19493	6.31983	6.052	6.7815
ASAP2	6.24873	6.09567	6.76786	6.6226	6.55649	6.97357	6.41781	6.40786	6.76353	6.38138	6.63887	6.2	6.43032	6.73421	6.52633	6.2271	6.48952	6.29271	7.07067	6.805	6.66968	7.135	6.7615	7.03517	6.49867	7.324	7.2075	6.92217	6.9425	7.4545	6.73958
ASAP3	5.19476	5.55873	5.11976	5.25464	4.97719	5.14802	4.77726	5.26743	4.94357	5.25722	4.9331	5.05815	5.21259	5.16386	5.00754	4.87231	5.16228	5.55095	5.26292	4.94981	5.12255	5.75054	5.21168	5.2925	5.48058	5.67467	5.50475	5.49667	5.2078	5.815	5.79617
ASB1	5.7769	5.67881	5.83558	5.69278	5.78924	5.80596	5.94857	5.69584	5.82361	5.73036	5.95294	5.8626	5.81348	5.87579	5.95198	5.88414	5.7177	5.64512	5.78377	5.82832	5.8419	6.1355	5.6765	6.4855	5.8645	6.09417	6.20567	5.93167	5.719	6.08617	5.79617
ASB10	6.57698	6.57579	6.44138	6.40204	6.36984	6.20548	5.92313	6.60317	6.32817	6.23821	6.36776	6.36486	6.49897	5.91556	5.98683	6.2271	6.49956	6.76437	6.69502	6.39567	6.20149	6.05521	6.65183	6.632	6.6585	6.99687	6.62917	6.56642	6.47	6.482	6.30407
ASB11	3.70214	3.69429	3.7131	3.71952	3.78257	3.68746	4.02841	3.60071	3.83369	3.75202	3.70012	3.9877	3.59357	3.74992	3.69845	3.77369	3.72532	3.76452	3.83143	3.74012	3.75317	3.741	3.70683	3.6995	3.77883	3.7205	3.755	3.74573	3.7821	3.922	3.7535
ASB12	3.77	3.82776	3.61429	3.69476	3.89754	4.00095	3.95611	3.84792	3.88286	3.83357	3.7236	3.91786	3.86635	3.8969	3.65262	3.82748	3.66119	3.76452	4.0524	3.62218	3.78738	3.711	3.594	3.941	3.9725	3.9585	3.792	3.8012	3.84567	3.8755	3.85533
ASB13	6.08103	6.42291	6.20637	6.45071	6.11237	6.135	6.12778	6.24659	6.06934	6.30194	6.18048	6.41476	6.18036	6.06962	6.19798	6.33607	6.21706	6.37452	6.26976	6.10865	6.47675	5.9105	6.089	6.14164	6.337	6.105	6.10617	6.10258	6.05663	5.9235	6.27041
ASB14	3.80643	3.58833	3.7831	3.86712	3.77556	3.86889	3.85548	3.50667	3.4931	3.62056	3.76258	3.73146	3.96466	3.6748	3.83024	3.58881	3.58833	3.60476	3.78476	3.74833	3.57786	3.7515	3.6985	3.8135	3.678	3.6575	3.689	3.632	3.67	3.62729	3.73933
ASB15	4.01746	3.8481	3.81405	3.66278	3.76718	3.88841	3.88726	3.70368	3.77508	3.84262	3.75333	3.63702	3.68714	3.83325	3.77437	3.61214	3.64817	3.88127	3.92143	3.51333	3.75706	3.7515	3.967	3.8465	3.8325	3.9165	3.771	3.741	3.67	3.57575	3.86592
ASB16	7.46095	6.34044	6.01333	5.52206	6.21594	6.0028	6.10937	5.97373	6.12558	5.80717	6.2571	7.0831	6.08527	5.6179	5.53139	6.82976	6.33469	6.43119	6.0469	6.44138	5.9054	4.84775	5.56792	4.89112	5.3175	4.9073	5.00617	5.2885	5.458	4.88775	4.93
ASB16-AS1	5.55302	5.45286	5.37357	5.48266	5.13224	5.1723	5.30405	5.39127	5.36325	5.24024	5.3169	5.37099	5.41806	5.15893	5.2623	5.53044	5.4873	5.67703	5.69381	5.30963	5.33496	5.1815	5.17467	5.13	5.364	5.22896	5.55867	5.33567	5.33142	5.078	5.33617
ASB17	3.67905	3.73238	3.86656	3.61214	3.83905	3.78443	3.72317	3.58738	3.795	3.88714	3.62107	3.58845	3.8273	3.87619	3.88317	3.53357	3.66119	3.60476	3.68976	3.78087	3.7419	3.72233	3.581	3.837	3.6265	3.83017	3.8017	3.699	3.7575	3.917	4.51383
ASB18	4.38091	4.62908	4.41619	4.6045	4.46476	4.34214	4.46516	4.5403	4.61786	4.42288	4.36932	4.75452	4.46679	4.35101	4.36008	4.64869	4.52877	4.67171	4.57243	4.41905	4.81063	4.4015	4.77952	4.84017	4.65675	4.95821	4.7025	4.53225	4.88025	4.82933	4.4215
ASB3	8.67665	8.82448	8.79881	8.71841	8.75905	8.71048	8.61651	8.73984	8.68267	8.7255	8.67433	8.57599	8.68706	8.84562	8.81563	8.63996	8.68	8.8104	8.61038	8.75087	8.75541	8.86425	8.603	8.749	8.5245	8.676	8.693	8.701	8.5615	8.7345	8.8755
ASB4	3.72516	3.69781	3.7869	3.755	3.66262	3.75087	3.74296	3.80273	3.68881	3.78897	3.87619	3.74303	3.59833	3.74	3.72135	3.64929	3.71214	3.65817	3.77	3.54548	3.78246	3.7005	3.79883	3.759	3.71317	3.69983	3.74317	3.875	3.6155	3.8725	3.69233
ASB5	3.79833	3.62833	3.74425	3.83476	3.63937	3.7031	3.76143	3.82405	3.74613	3.87535	3.78266	3.81252	3.72077	4.02117	3.62056	3.80488	3.9727	3.75359	3.79505	3.84157	3.78246	3.931	3.568	3.533	3.8525	3.83933	3.8725	3.761	3.709	3.761	3.581
ASB7	5.01395	5.01808	5.11516	5.17228	5.21	5.16651	5.21703	4.94742	5.08044	5.16349	5.20139	5.03901	5.01786	5.10214	5.0444	5.12595	5.03587	4.94481	5.04827	5.19857	5.00151	4.8935	4.79777	5.17667	4.888	4.6475	4.95	5.0936	4.7135	4.99992	4.87733
ASB8	4.85214	4.6625	4.6681	4.90333	4.86747	4.82461	4.85877	4.60762	4.73931	4.69905	4.76071	4.73274	4.53024	4.8431	4.79942	4.74103	4.77288	4.65387	4.74294	4.90167	4.52881	4.6634	4.59437	5.364	4.6975	4.5879	4.755	4.86483	4.389	5.22392	4.62933
ASB9	4.83159	5.01808	4.81651	5.09865	4.6427	5.11206	4.47429	4.9127	4.80119	4.90206	4.58415	4.86214	4.89359	4.815	4.89147	5.20429	5.17214	5.08155	4.96379	4.72075	4.86636	4.641	4.8645	4.39867	4.9055	4.41325	4.675	5.059	4.807	5.06925	5.08617
ASB9P1	4.09696	4.1704	4.0675	4.01088	4.09167	4.04744	3.80198	4.0381	4.0231	4.09167	4.00262	4.27198	4.26667	3.99333	4.04944	4.01913	4.20867	4.05935	4.1881	3.93857	3.90873	4.021	4.04754	4.014	4.225	4.2055	3.932	3.90798	3.99467	3.9915	4.0525
ASCC1	6.13067	5.81683	5.8405	5.91454	5.86821	5.9323	5.80832	5.79611	5.84984	5.88464	5.8001	5.71314	5.7377	5.91556	5.73536	5.92673	5.89466	5.99155	5.92276	5.96913	5.77687	5.4405	5.756	5.946	5.79317	5.7325	5.89967	5.90623	5.70417	5.7335	5.6855
ASCC2	5.61762	5.30448	5.47897	5.34423	5.38431	5.48891	5.46563	5.53111	5.46395	5.49169	5.53403	5.81087	5.36242	5.42559	5.58742	5.65063	5.5654	5.32581	5.42284	5.52901	5.57271	5.32	5.50933	5.53779	5.28767	5.09372	5.272	5.43333	5.3745	5.09372	5.297
ASCC3	6.2581	6.85694	7.25087	7.00603	6.67661	6.95266	6.92655	7.02548	7.05115	7.21996	6.61933	6.65115	7.08885	6.88929	6.79119	6.69369	6.8631	6.73706	6.83143	6.58929	6.93833	6.88625	6.96283	6.566	6.9745	6.85883	6.69	6.791	7.0115	6.23118	7.02083
ASCL2	6.73774	6.7123	6.65792	6.42202	6.39758	6.21429	6.46968	6.29343	5.93566	6.84302	6.35956	6.5275	6.67266	6.3869	6.00109	6.34024	6.38905	6.65323	6.2803	6.23758	7.04792	4.50967	5.3125	4.27875	5.88067	4.617	5.32958	5.6955	5.24112	3.9915	5.916
ASCL3	3.76056	3.72278	3.93119	3.77	3.52381	3.78443	3.67857	3.71619	3.51524	3.84262	3.75333	3.71563	3.72077	3.59667	4.00242	3.92065	3.8031	3.89	3.83857	3.78087	3.84857	3.761	3.673	3.962	3.812	3.547	3.892	3.82917	3.8265	3.85425	3.835
ASCL4	3.74754	3.86833	3.75405	3.87769	3.41905	3.59548	3.73095	3.89966	3.91363	3.50036	4.03063	3.71563	3.65262	3.85463	3.79756	3.96381	3.88905	3.80857	3.7631	3.98373	3.43238	3.7805	3.7625	3.554	3.823	3.518	3.6385	3.52	3.80783	3.564	3.689
ASF1A	4.19901	4.06563	4.27214	4.12935	4.4177	4.2069	4.1331	4.17754	3.92552	4.21202	4.39921	4.25302	4.14901	4.24413	4.1496	4.38029	4.24087	4.07032	4.08403	4.30161	4.05907	4.291	4.1015	4.56517	4.19417	4.067	4.15508	4.31683	4.02267	4.77804	4.06367
ASF1B	5.88559	5.28452	4.98968	4.91491	4.96694	4.9307	4.97105	4.97913	5.0069	4.71062	5.0837	5.14098	4.84845	5.06799	4.81012	5.24546	5.10202	5.33587	5.03103	4.94981	4.87838	4.50071	4.2985	4.3005	4.61725	4.38433	4.81767	4.48983	4.4305	4.11883	4.60017
ASGR1	5.4126	5.54786	5.32516	5.35837	5.2874	4.96143	5.32157	5.06799	5.18845	5.25722	5.01942	5.50619	5.13921	5.01667	4.95637	5.23952	5.25544	5.51881	5.03103	5.03581	5.56679	4.29817	5.03593	4.43233	4.66345	4.483	4.5475	4.592	5.003	4.52508	4.93867
ASGR2	6.08952	6.20048	6.08385	5.77583	6.36	5.47869	6.00583	5.79611	5.73944	5.95286	6.0996	6.17934	5.86626	5.79071	5.55873	5.83901	5.98595	6.22747	5.56302	5.80565	5.99889	5.22242	6.164	4.84017	5.773	4.685	5.02437	5.88583	6.0413	4.38025	5.26767
ASH1L	5.15095	5.75835	5.63468	5.74401	5.75409	5.62708	5.62708	5.74619	5.69453	5.7575	5.5531	5.64345	5.71894	5.72755	5.69619	5.70027	5.61794	5.73032	5.70942	5.70111	5.54357	5.9505	5.88333	6.26108	6.22367	6.20613	6.00629	5.969	5.79443	5.8235	5.75433
ASH1L-AS1	5.61762	5.62016	5.84984	5.76611	5.61643	5.61794	5.77778	5.76687	5.64706	5.92534	5.69494	5.6848	5.63817	5.72755	5.87734	5.79944	5.57532	5.73952	5.6044	5.72312	5.7869	5.825	5.844	5.843	5.64417	6.30683	5.6655	5.706	5.89987	6.173	5.58742
ASH2L	6.66552	6.73156	6.27159	6.9169	6.72029	6.91143	6.71504	6.80287	6.76353	6.62786	6.87924	6.73607	6.68183	6.73421	6.86869	6.79976	6.80214	6.73706	6.79353	6.89679	6.69972	6.718	6.514	6.9245	6.895	6.5869	6.922	6.90058	6.47	6.7275	6.65079
ASIC2	4.32952	4.41859	4.65702	4.49971	4.08079	4.50162	4.1331	4.25571	4.64778	4.27881	4.39921	4.29905	4.30857	4.32996	4.47159	4.54937	4.37963	4.50683	4.63683	4.43069	4.52881	4.07142	4.61107	4.4615	4.452	4.5195	4.47233	4.44142	4.7648	4.236	4.225
ASIC3	4.33976	4.46643	4.32016	4.4073	4.4177	4.22821	4.10833	4.37095	4.29665	4.24929	4.16937	4.47822	3.9854	4.21635	4.34937	4.32016	4.29905	4.25208	4.34606	4.20169	4.4269	4.291	4.2805	4.4615	4.2035	4.3195	4.3205	4.0365	4.4305	4.3195	4.4035
ASIC4	9.52406	8.71095	7.63893	7.95	8.19095	7.81202	7.83976	8.14946	7.81937	8.00921	8.03722	8.60709	8.19107	7.40161	7.43155	8.5881	8.18881	8.59494	8.06913	8.15443	8.00619	6.37633	7.45267	6.1275	7.3585	6.50988	6.49975	7.23683	7.389	6.03	6.7505
ASIC5	3.66968	3.77357	3.85548	3.70552	3.61024	3.86889	3.79107	3.61976	3.81405	3.65452	3.95988	3.70286	3.7381	3.86532	3.87266	3.76238	3.89944	3.77452	3.79505	3.79069	3.77381	3.79943	3.673	3.671	3.656	3.941	3.8435	3.82917	3.78733	3.835	3.602
ASIP	4.11817	3.95143	3.92098	3.79238	3.8881	3.88841	3.93588	3.79052	4.06833	3.91786	4.07052	4.19893	4.13843	4.05738	3.83024	4.09097	4.07929	4.1754	4.11738	4.08044	3.95738	3.94	4.08921	4.0455	4.002	3.98717	3.88117	4.11683	3.985	3.865	3.95175
ASL	6.65452	6.67381	6.75909	6.59036	6.5879	6.7329	6.61452	6.70099	6.68529	6.62786	6.68476	7.12246	6.5973	6.49984	6.73113	6.89976	6.7626	6.73706	6.84405	6.67032	6.56794	6.60642	6.596	6.797	6.719	6.5502	6.8155	6.7505	6.4925	6.25338	6.53283
ASMT	3.87667	4.86556	4.17127	4.22649	4.30857	4.39066	4.36774	4.55151	4.3731	4.29881	4.16937	4.30942	4.26667	4.49532	4.1496	4.02929	4.26667	4.25208	4.06393	4.15401	4.15603	4.1945	4.351	4.63	4.1735	4.48	4.17275	4.412	4.184	4.64475	4.266
ASMTL	7.30857	7.11825	7.185	7.03865	7.08151	7.05833	7.0619	7.07913	7.0619	7.15024	7.08123	7.19845	7.11	7.04627	7.14849	6.91036	7.13706	7.08565	6.98413	7.29175	7.13905	7.46425	7.29158	7.73333	7.42917	7.76525	7.3785	7.368	7.226	8.13875	7.2515
ASMTL-AS1	5.42284	5.06871	5.60532	5.52206	5.51758	5.39015	5.51839	5.50849	5.48563	5.39437	5.3169	5.66609	5.53147	5.53915	5.43913	5.25611	5.34301	5.01225	5.36762	5.47583	5.4548	5.048	5.1925	4.73757	5.18	5.071	4.83962	4.94779	5.21417	4.5985	5.41729
ASNS	6.46968	6.31357	6.5325	6.37829	6.48762	6.33841	6.56222	6.53794	6.38318	6.46063	6.57246	6.43683	6.57159	6.3119	6.64476	6.42952	6.48952	6.42553	6.45563	6.39861	6.53627	6.51733	6.40155	6.24867	6.22042	6.3855	6.2235	6.15517	6.30683	6.07983	6.69925
ASNSD1	7.48643	7.74603	7.66825	7.61492	7.67976	7.66679	7.5196	7.8006	7.79722	7.7394	7.68202	7.77643	7.77357	7.51405	7.63881	7.64917	7.69286	7.57405	7.69214	7.50071	7.45762	7.8075	7.587	7.78	7.7415	7.49275	7.593	7.71483	7.53567	7.71008	7.536
ASPA	4.13685	4.32395	4.01286	4.50762	4.31857	4.08683	3.92556	4.60762	3.65077	4.37975	3.89857	3.96024	4.57638	4.815	4.54413	4.17665	4.13079	4.30952	4.00252	4.1	4.05907	5.825	4.64979	5.2305	5.15983	5.12327	5.3625	5.25988	4.70679	5.54267	4.93
ASPDH	3.80643	3.91976	3.95159	3.86712	3.65762	3.92806	3.69048	3.79052	3.92552	3.81377	3.85	4.03667	3.77286	3.82212	3.66357	3.69516	4.00194	3.98262	4.0524	3.83159	3.85476	3.85767	3.9135	4.3005	3.76475	3.7575	3.942	3.8685	3.885	4.02933	3.524
ASPG	4.0765	4.03171	4.08849	3.93079	3.86825	4.01054	3.84845	3.97506	3.89119	3.86529	3.86913	3.92837	3.9371	3.8969	3.91397	3.8892	3.91024	3.89952	4.00252	3.91971	4.01143	3.92125	3.6585	4.00267	4.225	4.047	4.0365	4.11683	3.81783	4.19775	3.671
ASPH	6.95798	7.3523	7.43452	7.59857	7.1354	7.21825	7.11357	7.48484	7.08968	7.46984	6.94766	7.24206	7.56444	7.33845	7.19508	7.27048	7.55508	7.34889	7.24952	7.08619	7.11651	7.073	7.1025	7.10883	7.19808	7.16783	7.24817	7.17467	7.09762	7.18723	7.2515
ASPHD1	6.90071	6.44238	6.4881	6.09437	6.66579	6.58421	6.44008	6.33512	6.77573	6.52026	6.72262	6.58282	6.85452	6.93571	6.35107	6.46041	6.05329	6.47115	6.39609	6.28762	6.62889	4.3415	4.9475	4.36657	4.8065	4.5665	4.43417	4.401	5.21417	3.9795	6.06517
ASPHD2	4.70804	4.56897	4.72226	4.58504	4.50377	4.72382	4.66006	4.60286	4.55185	4.71619	4.74468	4.5794	4.59683	4.53762	4.56897	4.64579	4.66192	4.66734	4.77855	4.67705	4.80119	3.814	4.31	3.789	4.1285	3.866	4.041	4.11201	4.28033	3.896	4.33958
ASPM	5.70925	5.7269	5.50833	5.66024	5.66325	5.36754	5.83698	5.61881	5.46395	5.35591	5.42175	5.62587	5.63817	5.79071	5.49897	5.59921	5.64032	5.65024	5.15095	5.46484	5.58548	4.088	4.533	3.941	4.70875	4.078	5.04675	4.9595	4.369	4.069	4.93867
ASPN	6.54587	6.91405	7.4777	7.64036	7.31944	8.085	7.10627	7.13548	7.57151	7.28341	7.42786	6.45278	7.23008	7.76262	7.45782	6.64635	7.5269	6.97476	7.59381	7.7369	7.13254	8.25342	7.851	8.72875	8.00867	8.74575	8.43917	8.0485	7.9005	8.38125	8.212
ASPRV1	5.49905	6.11151	5.84984	6.32087	6.03504	6.12143	5.95452	6.3225	5.76706	6.11964	6.21429	5.81952	6.07476	6.04611	6.15683	5.75044	5.96504	6.1111	5.63428	6.16397	5.86599	6.1845	5.776	5.804	6.05542	6.1875	5.464	6.0505	5.7835	5.91825	6.086
ASPSCR1	5.50938	5.3342	5.26175	5.26142	5.23325	5.2643	5.26867	5.2717	5.28681	5.244	5.34744	5.60082	5.31975	5.20094	5.26721	5.46263	5.37714	5.32933	5.3174	5.2777	5.41076	5.2272	5.203	5.38857	5.24033	5.27053	5.3763	5.19173	5.2087	5.19137	5.20943
ASRGL1	7.08853	7.55002	7.26968	7.37333	7.05952	7.165	7.26095	7.45714	7.29571	7.32151	7.23008	7.76544	7.40429	7.16972	7.29643	7.32929	7.26143	7.58683	7.125	7.26095	7.5369	7.40092	7.32083	7.074	7.561	7.37767	7.0415	7.16575	7.349	6.92967	7.402
ASS1	5.70393	6.54444	6.14967	6.56225	6.23119	6.29119	6.18139	6.16857	6.53394	6.26905	6.44706	5.67516	6.2906	6.25762	6.61357	5.72071	5.86722	6.50438	6.29143	6.17306	5.76289	6.5745	6.92708	7.21	7.0115	6.59442	6.81983	6.97233	6.86033	6.53188	6.66763
ASTE1	5.20127	5.09153	5.35143	5.00667	5.33508	5.30175	5.31595	5.19108	5.18167	5.26274	5.34744	5.23167	5.235	5.28419	5.29126	5.162	5.31024	5.05235	5.21238	5.30963	5.37437	5.1815	4.5045	5.03342	5.01033	4.7525	4.87258	5.059	4.451	4.8975	5.08617
ASTN1	3.69152	3.77875	3.61071	3.76617	3.75913	3.87619	3.69623	3.74119	3.76667	3.78897	3.78266	3.80319	3.79919	3.71214	3.70929	3.62714	3.61738	3.91714	3.82183	3.6479	3.77381	4.704	3.9135	3.76275	3.8285	4.184	3.7395	3.765	3.8515	4.4725	3.80283
ASTN2	5.7769	5.3622	5.45683	5.25016	5.37873	5.07886	5.35175	5.1823	5.30548	5.11534	5.33012	5.28998	5.44306	5.2796	5.4875	5.40859	5.33222	5.49893	5.53937	5.71746	5.09769	5.2625	5.418	5.95804	5.309	5.58717	5.6445	5.50683	5.2875	5.355	5.155
ASTN2-AS1	3.77	3.87865	3.75405	3.72683	3.70246	3.77333	3.72317	3.71619	3.86394	3.62056	3.56893	3.82183	3.6277	3.68714	3.77437	3.77369	3.7727	3.85075	3.87825	3.78087	4.08968	3.885	3.74425	3.76275	3.72	3.70567	3.8435	3.678	3.837	3.77233	3.659
ASXL1	5.94524	6.22139	6.31881	6.21881	5.98239	6.07865	6.29629	6.09881	6.13532	6.08667	6.05873	6.08704	6.14881	6.04611	5.98683	5.93566	5.98595	6.20298	6.14905	6.01619	6.25667	7.5455	6.33083	6.37667	6.699	6.88825	6.43367	6.423	6.4925	6.5255	6.26508
ASXL2	5.75113	5.78377	5.867	5.9183	5.89349	5.96405	5.98147	5.93464	5.84345	5.95286	5.91603	6.03738	6.02452	6.01754	5.95198	6.0021	5.90893	5.86506	5.8852	5.92925	5.94646	5.714	5.73187	5.69822	5.58833	5.6785	5.73051	5.79392	5.7805	5.633	5.83358
ASXL3	4.17857	4.17984	4.19091	4.35262	4.45338	4.2069	3.93588	3.97506	4.3053	3.79246	4.08213	3.89873	4.17722	4.13119	4.18825	3.79447	4.15042	4.2625	4.20869	4.38905	3.98262	5.0595	4.48233	5.4555	4.53092	4.685	4.755	4.714	4.516	5.46167	4.51383
ASZ1	3.64964	3.55619	3.70315	3.61214	3.70246	3.59548	4.07762	3.80273	3.90254	4.0019	3.74433	3.67008	3.42857	3.6748	3.8081	3.67536	3.60837	3.58095	3.72181	3.74012	3.84054	3.7005	3.63	3.581	3.58	3.628	3.515	3.581	3.84567	3.896	3.671
ATAD2	6.00389	6.09567	6.21171	6.19905	6.27669	6.14976	6.04619	6.19905	6.095	6.00429	6.18639	5.89758	6.14881	6.10476	6.21107	6.07623	6.27233	6.01105	6.11657	6.20595	6.2273	6.36825	6.06992	6.42475	6.205	6.596	6.3842	6.37042	6.0413	6.43367	6.10717
ATAD2B	5.53349	5.3473	5.25079	5.12083	5.32571	5.30175	5.30405	5.24563	5.19224	5.33488	5.18183	5.15115	5.09246	5.34476	5.27143	5.22442	5.27056	5.41001	5.11429	5.25481	5.26445	5.3415	5.34454	5.2635	5.18	5.418	5.22775	5.106	5.165	5.6035	5.2231
ATAD3A	8.04143	8.28571	7.99988	7.9381	7.81976	7.88024	7.83095	8.1204	7.90976	7.76183	7.7394	8.16024	7.94093	7.88639	8.03833	8.19952	7.97357	8.1219	7.82036	7.81853	7.95103	7.6395	7.90833	7.80675	7.595	7.6605	7.66325	7.59533	7.869	7.5835	7.8415
ATAD3B	7.29329	7.55972	7.48933	7.30563	7.31853	7.30778	7.305	7.50937	7.38095	7.00302	7.26198	7.54905	7.35389	7.33444	7.45782	7.56151	7.40302	7.49127	7.2969	7.2877	7.37175	7.18	7.26642	7.12725	7.0315	7.1655	7.10833	6.93933	7.20967	6.85767	7.32467
ATAD3C	4.22762	4.14827	4.3827	4.2591	4.23563	4.39066	4.34288	4.25571	4.38905	4.12111	4.36932	4.38052	4.08849	4.30151	4.32294	4.56464	4.43516	4.3881	4.44544	4.288	4.26778	4.23842	4.44017	4.5325	4.158	4.409	4.42317	4.2655	4.52508	4.305	4.07721
ATAD5	4.04718	4.41859	4.50373	4.19758	4.19603	4.17905	4.20508	4.32885	4.21857	4.09167	4.03063	4.18087	4.35378	4.36942	4.2304	4.16611	4.25071	4.40762	4.25767	4.07079	4.35107	4.002	3.89375	3.984	3.76475	4.078	4.0365	3.951	3.985	4.05954	4.14267
ATAT1	5.26067	5.37369	5.49493	5.19151	5.48175	5.36299	5.32758	5.44484	5.34744	5.25088	5.48353	5.27188	5.19038	5.47233	5.4031	5.39595	5.40698	5.41001	5.32689	5.29721	5.44038	5.51617	5.16667	5.3735	5.193	5.3685	5.18104	5.213	5.36233	5.4555	5.55592
ATCAY	3.79357	3.75976	3.70963	3.6727	3.80857	3.68641	3.84397	3.80867	3.69683	3.83	3.77786	3.75952	3.74085	3.665	3.74762	3.64929	3.85976	3.65817	3.74833	3.69152	3.79871	3.761	3.66817	3.759	3.7505	3.86163	3.7345	3.7645	3.8125	3.7074	3.8065
ATE1	4.71715	5.08012	5.31304	5.21827	4.98621	5.03194	5.04107	5.13629	5.09164	5.07185	4.93976	5.21206	5.12887	4.90071	4.97873	5.12595	5.15369	4.9594	5.0119	4.82508	4.93944	4.941	5.24267	5.23967	5.0015	5.484	5.08092	5.17725	5.28	5.2842	4.97725
ATE1-AS1	4.03722	3.87865	4.51516	4.37544	4.03548	4.86353	4.29	4.32885	4.75021	4.26857	4.55482	4.15981	4.95824	4.97011	4.52179	4.23768	3.84048	3.88127	4.42861	4.37171	3.83333	4.8975	3.7365	3.931	4.732	3.96829	4.40367	4.5735	3.63	4.11883	4.461
ATF1	6.26989	6.47897	6.64774	6.85234	6.88071	6.78968	6.77742	6.81262	6.67708	6.84302	6.79119	6.73607	6.53765	6.79583	6.88071	6.85155	6.68082	6.25546	6.58302	6.93405	6.71791	6.95783	6.55371	7.24833	6.804	6.4836	7.002	7.01858	6.459	7.155	6.8855
ATF2	5.70925	5.32876	5.27188	5.26535	5.35667	5.39015	5.31595	5.28829	5.31115	5.49169	5.20139	5.21206	5.12887	5.37639	5.37183	5.27644	5.39848	5.22952	5.3227	5.30963	5.38383	5.4405	5.43875	5.54842	5.33592	5.23675	5.576	5.42775	5.458	5.705	5.27825
ATF3	7.58353	6.40056	7.1144	6.45071	6.49679	6.34798	6.29629	6.29004	6.49821	6.61143	6.32362	6.78829	6.18867	6.49679	7.05968	6.49453	6.49956	6.49929	6.61369	6.47238	7.07091	6.899	6.85975	5.90328	5.90888	6.88325	7.39975	5.92254	6.8785	6.54333	5.96933
ATF4	10.2055	10.4502	10.8468	10.6414	10.7028	10.5951	10.4742	10.5805	10.6727	10.4255	10.6188	10.3917	10.6325	10.5652	10.6462	10.508	10.4577	10.406	10.6727	10.5693	10.3948	10.4835	10.54	10.9445	10.667	10.9815	10.6057	10.7268	10.5239	10.9315	10.6653
ATF4P4	4.36095	4.45748	4.40746	4.51667	4.1322	4.24929	4.19556	4.20706	4.34206	4.25845	4.30933	4.29905	4.44421	4.16	4.34937	4.60333	4.40881	4.46571	4.71042	4.32048	4.21034	4.24437	4.42567	4.36657	4.50167	4.40491	4.53092	4.39	4.46763	4.28283	4.318
ATF5	6.82079	6.46223	6.46937	6.51917	7.01683	6.29119	6.72706	6.46167	6.55786	7.02885	6.9232	6.41476	7.12048	6.39802	6.31032	6.68349	6.47319	6.40821	6.13905	6.14976	6.52587	5.69733	5.73942	5.60333	5.49033	5.87217	5.40213	5.6052	5.714	5.49517	5.99142
ATF6B	5.03302	5.02999	4.86106	5.25464	5.22048	5.05569	5.15468	4.90151	5.10302	4.82728	4.96774	5.07254	5.16337	5.10609	4.99527	5.11569	4.94071	5.14549	5.12558	4.92111	4.85297	4.84775	4.758	4.849	5.0015	4.8725	4.94475	4.90392	4.85917	5.156	4.86738
ATF7	3.69152	3.73238	3.99262	3.98163	3.98762	3.59548	3.84845	4.13931	3.85326	3.91786	3.98036	3.92837	3.91585	3.97333	3.81924	3.59952	3.99143	3.84095	3.72181	3.89095	3.78246	3.6615	3.9135	3.962	3.73567	3.97938	3.792	3.741	3.9315	4.02933	3.88633
ATF7IP	6.48649	6.81738	6.95286	7.09294	6.70056	6.81643	6.83393	7.15905	6.68333	7.07829	6.68476	6.8644	7.04	6.83643	6.81321	6.78556	6.99988	6.77563	6.73063	6.74198	6.97573	6.934	6.65183	6.37667	6.76363	6.4901	6.4165	6.616	6.69475	6.5975	6.92625
ATF7IP2	6.42127	6.40571	6.52706	6.63373	6.54659	6.4256	6.00583	6.3603	6.62929	6.43278	6.37761	5.94646	6.5869	6.21246	6.22925	6.19656	6.54881	6.47115	6.16708	5.92476	6.90274	6.397	6.06992	5.5045	5.93433	5.484	5.41517	6.0505	6.00933	5.91825	6.06517
ATG10	4.51565	4.47754	4.61548	4.46563	4.61782	4.58147	4.42378	4.39877	4.60532	4.58063	4.51016	4.55405	4.47859	4.57131	4.52179	4.63065	4.63385	4.50262	4.55302	4.56286	4.4269	4.8175	4.50121	4.804	4.53483	4.778	4.57712	4.5635	4.4625	4.891	4.452
ATG101	6.39246	6.58548	6.72927	6.66679	6.72029	6.97357	6.73917	6.83119	6.78437	6.82294	6.89056	7.03298	6.69167	6.89833	6.95929	6.94302	6.85421	6.59714	6.8536	6.87895	6.89071	6.63883	6.9035	7.11583	6.596	6.804	7.021	6.782	6.77808	6.5385	6.7716
ATG12	5.85177	5.84114	5.77758	5.80195	5.83905	5.92534	5.85575	5.79095	5.76507	5.90125	5.92544	5.94275	5.78881	5.83887	5.71938	5.87809	5.83589	5.78658	5.89798	5.81181	5.83472	5.946	5.6765	6.0065	5.7225	5.69131	5.81594	5.863	5.74467	5.831	5.793
ATG13	5.13937	5.01393	4.92008	5.25016	5.30119	5.37087	5.27998	5.19873	5.44677	5.00844	5.31198	5.61881	5.20337	5.36731	5.37183	5.34708	5.33222	4.99917	5.34911	5.22135	5.14041	4.97267	5.203	5.322	5.15575	5.22633	5.34642	5.23375	5.2875	4.92075	5.35633
ATG14	4.24198	4.47754	4.61548	4.4073	4.30857	4.33099	4.52264	4.40905	4.32238	4.46881	4.50613	4.51952	4.46679	4.44421	4.48063	4.60333	4.59605	4.47563	4.63683	4.43069	4.29389	4.312	4.65825	4.82317	4.452	4.5879	4.48343	4.42117	4.27017	5.3525	4.502
ATG16L1	5.73762	5.62702	5.48327	5.53944	5.54171	5.5577	5.57552	5.49079	5.58643	5.61716	5.48984	5.61881	5.4854	5.46188	5.52532	5.56554	5.51865	5.49389	5.47897	5.50075	5.62135	5.50021	5.4925	5.66633	5.37675	5.58717	5.51583	5.4375	5.59833	5.50117	5.52783
ATG16L2	8.64468	8.88195	8.97238	8.88929	8.94857	8.642	8.9331	9.16435	8.68992	8.84505	8.76742	9.08571	9.09415	8.85175	8.60063	9.05143	9.1842	8.96829	8.78965	8.83738	9.1498	8.082	8.57387	6.85008	8.12025	7.93342	7.46617	8.2575	8.517	7.4545	8.57137
ATG2A	6.7323	6.68778	6.44837	6.5577	6.55649	6.58421	6.44008	6.45109	6.50557	6.51071	6.51716	6.56105	6.46063	6.5069	6.66254	6.48599	6.52825	6.5726	6.38639	6.55226	6.51651	6.27617	6.9665	6.39383	6.49867	6.9245	6.6255	6.45975	6.99725	6.545	6.5665
ATG2B	6.23786	6.32841	6.58929	6.44387	6.6071	6.41438	6.50933	6.51546	6.50557	6.52026	6.48937	6.27492	6.57675	6.3759	6.64833	6.4052	6.56929	6.54988	6.498	6.53567	6.50405	6.67983	6.545	6.85008	6.73842	6.96758	6.62	6.83692	6.4425	6.83292	6.661
ATG4A	6.33698	6.24437	6.21171	5.97667	6.19095	6.14011	6.08704	6.01907	6.01468	6.09595	6.13196	6.16845	6.02871	6.0556	6.14702	6.20806	6.14831	6.29271	6.09379	6.10474	6.14137	5.89367	5.941	6.4588	5.8915	5.74167	5.997	6.15517	5.92	6.11117	6.03633
ATG4B	6.06452	6.38318	6.45251	6.485	6.52238	6.5331	6.59071	6.58402	6.49313	6.51651	6.60345	6.60738	6.49897	6.42988	6.57464	6.58976	6.57827	6.52853	6.51762	6.55762	6.49038	6.67983	6.5245	6.5175	6.54735	6.5869	6.5555	6.4365	6.566	6.265	6.51458
ATG4C	5.02356	4.90516	5.0451	5.05957	4.98621	5.00083	5.14037	5.19638	5.04298	5.11167	5.07849	5.1823	5.11508	5.00079	4.92871	5.15115	5.21996	4.84778	4.97913	5.1777	4.92899	5.00537	4.70227	4.70967	4.877	4.61083	4.72623	4.8305	4.56483	4.82933	4.84288
ATG4D	5.04246	4.85405	4.80567	4.65897	4.76234	4.69389	4.74512	4.63786	4.67921	4.5856	4.79012	4.8239	4.73794	4.65627	4.64488	4.74103	4.76298	4.79734	4.68548	4.73079	4.57932	4.52093	4.64979	4.872	4.61725	4.861	4.861	4.6445	4.60113	4.61983	4.70233
ATG5	6.0227	5.73754	5.91022	5.83056	6.04855	5.97079	5.96471	5.89754	5.92867	5.83638	6.02131	5.97548	5.92825	5.93224	5.90954	5.97325	5.93183	5.91266	5.9645	6.05989	5.86032	6.11	5.71967	6.28242	5.78483	5.65002	5.92992	5.95233	5.7085	6.274	5.79443
ATG7	7.00762	6.60579	6.63658	6.34772	6.29722	6.5331	6.51917	6.58402	6.39246	6.5341	6.71913	6.94071	6.40319	6.47667	6.37722	6.74555	6.65738	6.56222	6.59429	6.54122	6.64655	5.6055	6.037	5.695	5.94278	5.94	5.77388	5.853	6.01748	5.57675	6.1325
ATG9A	5.02929	4.87579	5.15956	5.29087	5.12214	5.3925	5.27032	5.23829	5.26309	5.19052	5.39659	5.4231	5.0337	5.40385	5.31897	5.40262	5.37183	5.01786	5.25621	5.3039	5.1649	4.91525	5.22277	5.2635	5.07893	5.299	5.4925	5.2545	5.1585	4.848	5.40467
ATG9B	3.74754	3.83913	3.89357	3.87769	3.86825	3.86392	3.86976	3.82857	3.85841	3.83738	3.84501	3.82714	3.89558	3.78468	3.89381	4.01286	3.88683	3.97825	3.79505	3.91548	3.84054	4.07142	3.822	3.904	3.99792	3.7205	3.865	3.786	3.889	3.84479	3.71517
ATIC	7.07976	7.08151	7.01389	6.86675	6.90048	6.89976	7.04095	6.82163	6.93881	6.97234	6.75817	7.0431	7.03333	6.7572	6.94968	7.09794	6.91143	7.04016	7.06135	6.93405	7.00599	6.40617	6.91175	6.975	6.67	6.75025	6.68	6.69475	6.8575	6.826	6.63975
ATL1	5.67897	5.89806	5.84984	5.84406	5.59716	6.05587	5.63801	5.59849	5.7769	5.7575	5.75202	5.45083	6.01143	5.86907	5.96579	5.45735	5.65087	5.76472	5.89798	5.82832	5.71813	6.32967	6.13767	6.5327	6.075	6.2355	6.276	6.0505	6.06267	6.393	5.60125
ATL2	5.5071	5.46436	5.62587	5.50722	5.39282	5.4449	5.50688	5.54405	5.47106	5.39087	5.384	5.41087	5.39302	5.45339	5.46768	5.3373	5.41143	5.54955	5.48367	5.31623	5.42115	6.20877	5.844	5.49883	5.44867	6.07442	5.55042	5.4175	5.9075	6.3342	5.5175
ATL3	6.82079	6.57579	6.54754	6.33119	6.50063	6.45627	6.53004	6.5069	6.62171	6.46923	6.5004	6.75179	6.54846	6.55603	6.44556	6.70619	6.46126	6.63373	6.5486	6.53567	6.47159	6.45117	6.71942	6.9425	6.5355	6.34933	6.98467	6.64725	6.662	6.5385	6.563
ATM	5.48877	5.58123	5.89349	5.71618	5.58595	5.64127	5.80171	5.85313	5.56429	5.79719	5.73859	5.85575	5.84282	5.7637	5.6496	5.73734	5.76726	5.54579	5.60913	5.73754	5.93635	5.37846	5.43875	4.93133	5.378	5.35867	5.15267	5.2885	5.42204	5.324	5.69173
ATMIN	4.98086	5.01283	4.96094	4.92234	4.92068	4.7964	4.89277	4.86033	4.89195	4.86762	4.94952	4.98384	4.89052	4.83924	4.92662	4.98833	4.87991	5.02879	5.07067	4.97964	4.88451	5.04028	4.8371	5.165	4.95587	4.91027	5.07519	4.9899	4.8834	4.98005	4.92192
ATN1	7.44063	7.03988	6.70873	6.53784	6.73905	6.82119	6.51917	6.58402	6.77573	6.40406	6.8156	6.41476	6.5669	6.85387	6.89512	6.55968	6.65738	6.96533	6.93222	6.79456	6.43095	6.68908	7.07475	7.68333	7.021	7.76525	7.2415	6.94325	6.9297	7.0725	6.873
ATOH1	3.47333	3.78381	3.81405	3.78242	3.97786	3.67944	3.57262	3.67214	3.4931	3.59381	3.83071	3.82183	3.64548	3.79087	3.85167	3.72992	3.8031	3.45214	3.48476	3.70929	4.52881	3.58325	3.6445	3.63	3.678	3.556	3.458	3.87817	3.699	3.907	3.775
ATOH7	3.63	3.60964	3.68571	3.64357	3.56381	3.6069	3.55238	3.80273	3.65077	3.65452	3.76258	3.54619	3.6019	3.82212	3.57762	3.53357	3.57821	3.61571	3.82714	3.69548	3.74988	3.733	3.6445	3.87683	3.76475	3.7785	3.6385	3.71069	3.922	3.907	3.581
ATOH8	5.10959	4.75647	5.17151	4.68036	4.94952	4.98133	4.9247	4.50071	5.20671	4.50922	4.70873	4.46298	4.6952	4.90492	5.01976	4.6377	4.78274	4.77476	5.01786	4.94652	5.02187	5.176	5.17837	5.21075	5.21125	5.28	5.42387	5.204	5.2325	5.484	4.848
ATP10A	5.25611	5.08365	5.51909	5.36389	5.19108	5.6628	5.22944	5.27794	5.42611	5.29337	5.27377	5.02854	5.50619	5.40385	5.409	5.2874	5.13794	5.06138	5.49895	5.38833	5.22214	5.17421	5.26421	5.733	5.74865	5.38725	5.6545	5.615	5.175	5.43183	5.21017
ATP10B	5.13435	5.2419	5.13238	5.16337	4.97719	4.97719	5.00629	5.17349	4.982	5.16988	5.11534	5.27621	5.0659	4.87639	5.0819	5.07536	4.99749	5.11167	5.14678	4.96119	5.37437	5.16792	5.006	5.13283	5.26203	5.27683	5.28983	5.239	5.02706	5.029	5.1445
ATP10D	4.49286	4.45748	4.64643	4.48782	4.52333	4.70623	4.435	4.36095	4.48325	4.27881	4.43637	4.30942	4.44421	4.3203	4.3881	4.17665	4.56853	4.2994	4.49135	4.43863	4.31905	4.5785	4.2805	5.0595	4.50167	4.3765	4.76562	4.8815	4.1635	4.73142	4.25475
ATP11A	6.89135	6.78226	6.83119	6.73804	6.57722	6.59333	6.51917	6.66613	6.70393	6.73028	6.84698	6.82087	6.55762	6.58968	6.46152	6.75119	6.41087	6.83095	6.60306	6.53567	6.47159	5.7545	6.042	5.88867	6.28222	5.76267	5.997	6.2261	6.09233	5.705	6.24525
ATP11AUN	3.9081	3.79478	3.57762	3.6727	3.86825	3.72524	3.79107	3.91048	3.63357	3.74643	3.52714	3.71563	3.94603	3.84279	3.83024	3.68714	3.67952	3.60476	3.7631	3.82183	4.29389	3.67392	3.8645	3.742	3.8525	3.895	3.98438	3.771	3.659	3.886	3.592
ATP11B	5.26067	5.25098	5.57359	5.51183	5.46259	5.47869	5.6181	5.70755	5.65849	5.6398	5.525	5.4231	5.48143	5.59794	5.67202	5.45735	5.45464	5.35831	5.55349	5.30963	5.46552	5.5535	5.74675	5.5865	5.78125	5.92302	5.71583	5.68	5.67558	6.20863	5.804
ATP11C	5.40206	5.46063	5.05317	5.7096	5.43769	5.36299	5.59704	5.51937	5.57647	5.45278	5.53877	5.41893	5.52595	5.54571	5.59743	5.40859	5.28008	5.55992	5.45115	5.32032	5.28808	5.4365	5.78183	5.88867	5.67767	5.65983	5.586	5.46667	5.8095	5.844	5.705
ATP12A	3.93929	3.88925	3.90952	3.80385	3.8881	3.92806	3.93588	3.84792	3.98425	3.75607	3.86913	4.00397	3.77286	3.87619	3.76312	3.94143	3.8031	3.86119	3.73218	3.83159	3.81976	3.875	4.057	4.35333	3.72658	3.81067	3.892	3.8405	3.84567	4.83988	4.235
ATP13A1	6.80913	6.34044	6.28111	6.06361	6.25776	6.23467	6.10937	6.23836	6.26917	6.21877	6.37761	6.47635	6.26989	6.15079	6.28143	6.48016	6.28159	6.32515	6.19684	6.30794	6.40389	5.60067	5.873	6.05558	5.9135	5.96933	5.94	6.02867	5.89987	5.3335	5.93767
ATP13A2	6.26989	5.96228	6.07609	5.72964	5.89754	5.84361	6.04167	6.01325	6.12127	5.85879	6.08421	6.33119	5.9452	5.98716	5.87734	6.13238	6.01317	5.92313	5.84631	6.10048	6.04619	5.86125	5.46067	5.66633	5.5335	5.5655	5.5945	5.625	5.50133	5.236	5.81442
ATP13A3	6.88762	6.65571	6.64135	6.77548	7.06571	6.9219	7.14595	7.03478	7.14893	7.02885	6.99496	7.04845	6.89798	7.15256	6.77857	7.13357	6.90667	6.71641	6.81262	6.842	6.90794	6.37633	7.16725	6.8175	6.67583	6.7015	6.688	6.49683	7.21383	6.87983	6.971
ATP13A4	3.862	3.7129	3.7284	3.71214	3.78262	3.79949	3.77802	3.7631	3.6719	3.77643	3.61476	3.7831	3.8073	3.70963	3.84738	3.81631	3.8031	3.69595	3.85387	3.78381	3.72135	3.88883	3.858	3.789	3.75517	3.738	3.8855	3.771	3.83195	3.803	3.728
ATP13A5	3.80643	3.65	3.80397	3.63238	3.78683	3.4706	3.88726	3.69476	3.68881	3.65452	3.82103	3.73146	3.85476	3.74992	3.65262	3.75143	3.59833	3.78694	3.65762	3.74833	3.7648	3.789	3.773	3.8135	3.73567	3.6985	3.8325	3.689	3.699	3.5985	3.8065
ATP1A1	6.5573	6.44806	6.66278	6.485	6.54004	6.65409	6.4881	6.57905	6.64948	6.54754	6.51841	6.59036	6.3929	6.64883	6.80042	6.66667	6.56929	6.44593	6.58302	6.47913	6.41942	6.40617	6.90833	6.41901	6.55845	7.12517	6.57877	6.6765	6.9035	6.6395	6.69
ATP1A1-AS1	4.1031	4.02095	4.05095	4.1881	4.28679	4.09968	4.19881	4.2627	4.27968	4.12833	4.32016	4.11942	4.42659	4.28468	4.19413	4.34206	4.26154	4.11676	4.21473	4.35411	4.08968	4.16183	4.09667	4.22817	4.09933	4.15317	4.18517	4.16083	4.1095	4.34292	4.22858
ATP1A2	3.73992	3.87865	3.98224	4.17791	4.07146	4.03889	3.95611	3.91048	4.08762	3.75607	4.11024	3.76738	4.045	3.9831	4.03349	3.78365	4.04933	4.07032	4.02308	4.21289	3.94849	5.37425	4.4515	5.27417	4.795	5.266	4.8495	4.666	4.389	5.785	4.432
ATP1A3	5.35829	5.76716	5.7379	5.55754	5.47175	5.53667	5.5281	5.67881	5.62714	5.6075	5.5531	5.92504	5.62763	5.1374	5.4875	5.76134	5.57532	5.90714	5.80885	5.57035	6.04964	5.364	5.63375	5.41713	5.804	5.80242	5.614	5.83592	5.89987	5.51617	5.23475
ATP1A4	5.64345	5.75438	6.02452	5.96302	6.06476	6.1773	6.02502	5.94524	6.17595	6.10837	6.02131	6.13905	5.76667	5.97698	6.03667	6.20262	5.90893	5.73032	6.12325	6.01619	5.9681	5.2052	6.07833	5.941	5.8965	6.17817	6.0625	6.0505	6.1165	5.70308	5.94825
ATP1B1	8.4881	7.83738	8.44381	8.3501	8.62234	8.52	8.51679	8.58161	8.37321	8.5503	8.21798	8.81845	8.3844	8.76738	8.03833	8.93576	8.53456	7.91937	8.3923	8.57925	8.35357	8.03825	7.7015	7.33883	8.433	8.18717	7.92767	8.4385	7.56467	7.94633	7.8345
ATP1B2	4.61048	5.14328	4.67843	4.8006	4.43317	4.43729	4.40079	4.94093	4.53911	4.80906	4.43637	4.39302	4.53929	5.00603	5.0819	4.45385	4.90333	5.07137	4.56218	4.48472	4.65968	5.484	5.1925	4.73757	5.364	5.8625	5.06225	5.365	5.1325	5.633	6.181
ATP1B3	10.0218	10.071	10.3052	9.99905	9.96944	10.17	10.0107	10.0313	10.1877	10.2122	9.99694	9.98063	9.96376	10.0948	10.1273	10.0441	10.1423	10.1477	9.98206	10.1144	10.06	9.1665	10.3009	10.0642	9.724	10.552	9.797	9.841	10.3115	10.0425	10.0184
ATP1B4	3.8681	3.70286	3.79262	3.77	3.95024	3.7379	3.65881	3.80273	3.795	3.69688	3.85984	3.81252	3.90614	3.93471	3.8614	3.85825	3.85976	3.87206	3.67889	3.91971	4.15603	3.6815	3.754	3.671	3.75517	3.86163	3.88117	3.85029	3.699	4.069	3.6785
ATP23	5.68869	5.86722	5.50833	6.09437	5.69377	6.05587	5.89071	5.56	5.94652	5.68079	5.93823	5.41321	6.09517	5.78377	5.58742	6.0054	5.87305	5.89595	6.2169	5.74484	6.25667	6.75175	5.52041	5.9	5.92576	5.87217	6.0625	5.5335	5.5305	6.33925	5.793
ATP2A1	3.80198	3.86487	3.87647	3.8502	3.82071	3.86302	3.69587	3.85825	3.88841	3.76508	3.85504	3.8327	3.91008	3.77462	3.87889	3.87371	3.81643	3.84095	3.91024	3.8873	3.84857	3.9425	3.78873	3.753	3.77133	3.85533	3.75517	3.81517	3.89967	3.886	3.80183
ATP2A2	6.37913	6.22806	6.60345	6.51917	6.35389	6.4256	6.44008	6.39246	6.57975	6.52544	6.35956	6.42964	6.42024	6.48793	6.52633	6.5669	6.25933	6.33893	6.41639	6.51055	6.34621	6.81467	6.6215	7.20367	6.75475	7.50417	6.83033	6.7335	6.62025	7.33275	6.577
ATP2A3	3.81836	4.09219	4.29964	4.1381	4.1221	4.33099	4.29	4.13016	4.1894	4.10127	4.05065	4.20909	4.11837	4.35101	4.15868	4.33921	4.25857	4.11071	4.01286	4.24421	4.05907	4.0455	4.16217	3.9935	4.0433	3.97938	4.19825	4.04633	4.2345	4.22667	4.235
ATP2B1	4.63262	4.76877	4.85539	5.03048	4.6696	4.86929	4.87349	5.09751	4.88517	5.04254	4.79598	4.9856	5.10667	4.86747	4.94959	5.04277	5.1131	4.90714	4.9681	4.77312	5.13657	4.46767	4.8775	4.65925	4.7432	4.70967	4.77095	4.73908	5.01642	4.5025	4.715
ATP2B1-AS1	4.11817	4.24149	4.07762	4.02	3.96833	3.95143	3.98429	3.89966	3.84283	4.10127	4.19861	3.94881	4.03413	4.0773	4.06905	4.04889	4.20867	3.89	4.03325	4.1181	3.97405	4.15571	4.1831	3.837	3.9315	4.108	3.8435	4.056	3.99467	4.05954	4.072
ATP2B2	3.83857	3.87865	3.90952	3.86929	3.85167	4.01433	4.00688	3.99143	3.99036	3.92333	3.86913	4.06332	3.99929	3.96829	4.00242	3.97032	3.93024	3.9969	3.7631	3.74012	3.85802	3.931	3.725	3.84112	3.9475	4.10173	3.917	3.98123	3.9285	3.81	3.7615
ATP2B3	4.51565	4.33992	4.12107	4.35262	4.25964	4.15933	4.12024	4.22165	4.1131	4.23563	4.23881	4.33524	4.15426	4.09524	4.29374	4.3527	4.21552	4.45595	4.33099	4.36095	4.43448	4.44683	4.2455	4.337	4.39117	4.306	4.26833	4.25367	4.2985	4.411	4.11133
ATP2B4	5.90246	5.88736	6.0646	6.04746	6.04937	6.1648	6.00963	5.89635	6.095	5.83016	5.92958	5.85567	6.02425	6.21706	6.18817	5.83417	5.93635	5.90379	6.05222	6.00315	5.90154	6.06583	6.28217	6.33033	6.0065	6.61933	6.25933	5.992	6.222	6.30357	6.22807
ATP2C1	5.8999	5.90907	6.36214	5.88675	5.95548	6.08348	6.15851	6.21488	5.84345	6.17846	6.00776	6.05238	6.2794	5.98296	5.93488	6.0823	6.22833	5.8743	6.16708	5.9556	6.10837	5.4555	5.28979	5.165	5.322	5.20917	5.31017	5.3415	5.496	5.27233	5.804
ATP2C2	3.71048	3.7129	4.0675	3.86712	3.87741	3.95143	3.96472	3.77905	3.92552	3.7731	3.99214	3.70286	3.6019	3.59667	3.84135	3.96381	3.88905	4.03147	3.80494	3.74833	3.7648	3.875	4.13873	3.7205	3.8325	4.022	3.7395	3.689	4.3595	3.826	3.72
ATP4A	3.81836	3.88925	3.92098	3.81405	3.80444	3.86889	3.69048	3.94464	3.6719	3.75607	3.85	3.93929	3.89558	3.79087	3.85167	3.74024	3.59833	3.74548	3.6696	3.88155	3.6719	3.7005	3.822	3.907	3.7085	3.604	3.85233	3.941	3.61	3.6995	4.11133
ATP4B	3.70214	3.65	3.65286	3.64357	3.45429	3.84881	3.65881	3.66278	3.73897	3.64595	3.51524	3.60452	3.65262	3.6146	3.59857	3.64381	3.63702	3.51286	3.62619	3.85167	3.98262	3.64567	3.6585	3.742	3.80283	3.6685	3.9025	3.72	3.7695	3.62729	3.699
ATP5F1A	8.70821	8.71095	8.86413	9.01661	8.96077	8.99286	9.05806	8.82726	8.945	8.7901	9.04976	8.95032	8.6177	9.08143	9.0027	9.10167	9.17052	8.78053	9.05948	9.12333	8.97107	9.216	8.88533	9.327	9.07783	8.908	9.22367	9.1655	8.8225	9.4955	9.08075
ATP5F1B	8.28262	7.98198	8.0531	8.09119	8.22143	7.81202	8.20198	8.15944	8.28643	8.13869	8.2831	8.22143	7.83778	8.405	8.23762	8.56111	8.33857	7.98198	8.35321	8.34488	8.28571	7.871	8.095	8.3595	8.0309	7.972	8.14	8.133	8.1345	8.337	8.29225
ATP5F1C	6.52214	6.96462	7.25087	7.26095	7.24008	7.36524	7.14595	7.3169	7.27446	7.33704	7.26198	7.32496	6.92571	7.28071	7.20016	7.46369	7.28198	6.87864	7.30468	7.39123	7.21556	7.65725	7.18025	7.606	7.241	7.25575	7.45325	7.33917	7.143	7.57258	7.349
ATP5F1D	7.98524	7.75837	7.59917	7.26095	7.53381	7.51262	7.41571	7.58095	7.60714	7.39008	7.63119	7.72556	7.49548	7.55063	7.5625	7.59709	7.68202	7.71167	7.67504	7.61599	7.79397	7.57137	7.7375	7.8815	7.6045	7.74696	7.716	7.4945	7.745	7.57258	7.49725
ATP5IF1	7.17151	7.28944	7.44159	7.51333	7.34913	7.41778	7.54484	7.44028	7.48548	7.48548	7.34452	7.36897	7.6323	7.55063	7.43845	7.37833	7.49786	7.37421	7.45063	7.56643	7.56413	7.899	7.37733	7.5095	7.4615	7.38583	7.44333	7.427	7.3555	7.54067	7.402
ATP5MC1	7.5906	7.57	7.59917	7.4519	7.57238	7.63381	7.69845	7.50429	7.5473	7.45762	7.58984	7.54905	7.44587	7.6156	7.6019	7.74167	7.68202	7.43333	7.60349	7.66754	7.62976	7.6045	7.59558	7.99267	7.638	7.3045	7.58325	7.562	7.637	7.5455	7.263
ATP5MC2	10.129	9.98349	9.86714	9.91429	9.89206	9.76664	9.8619	9.8573	9.79286	9.53024	9.96212	9.82108	9.80917	9.80429	9.89413	9.89952	9.88357	9.90369	9.67418	9.82328	9.8596	9.66133	9.66133	9.692	9.7685	9.514	9.54536	9.7215	9.69075	9.656	9.643
ATP5MC3	9.59683	9.62325	9.71464	9.74024	9.8619	9.89206	9.85214	9.99238	9.98063	9.89	9.8619	9.95429	9.76046	9.91976	9.78714	10.1477	9.83798	9.54127	9.71464	9.91702	9.91976	9.50034	9.55583	9.94763	9.724	9.249	9.667	9.7665	9.455	9.7105	9.735
ATP5MD	9.63155	9.94524	10.0738	10.0165	10.071	10.0357	10.0973	9.97786	10.0627	9.8697	10.1236	9.89599	9.95429	9.88143	10.0218	10.1123	10.0895	9.95429	10.0533	10.0578	9.92865	10.6103	9.832	10.2115	10.1293	9.944	10.0571	10.0498	9.80425	9.98362	9.89367
ATP5ME	9.89599	10.1464	10.1158	9.98496	10.1102	10.0462	10.0462	10.0421	10.0948	9.96048	10.015	10.0895	10.1316	9.98643	10.0357	10.0767	10.0895	10.0654	10.0822	9.96048	10.0556	10.4635	9.94925	10.1893	9.977	9.897	9.989	9.85775	9.9085	9.96756	9.92604
ATP5MF	9.16524	8.88195	8.72333	8.63258	8.71302	8.71433	8.59556	8.59623	8.70573	8.61038	8.72333	9.01388	8.69067	8.63921	8.60063	8.96143	8.66383	8.82726	8.71647	8.7654	8.71944	8.56875	8.3565	8.45625	8.38725	8.01608	8.4625	8.453	8.339	8.0595	8.261
ATP5MGL	6.113	6.18714	6.07052	6.1404	6.19095	6.08464	6.10937	6.04265	6.06349	6.10837	6.13196	6.1298	6.08056	5.99129	6.06835	6.2271	6.05873	6.1796	6.1219	6.13591	6.12583	6.32967	6.12538	6.30042	6.20055	6.0895	6.1735	6.2415	6.06267	6.14075	6.1275
ATP5MPL	7.26095	7.23944	7.00571	7.07	7.12558	6.87071	7.07091	7.0677	7.07631	7.01925	7.1319	7.2473	7.18262	7.05512	7.0006	7.13167	7.12048	7.26024	6.92341	7.12373	7.0781	7.44175	6.94383	6.9508	7.0425	6.848	7.1995	6.77217	6.90833	6.749	6.8405
ATP5PB	8.48079	8.43206	8.26056	8.36214	8.51423	8.33857	8.35734	8.49738	8.42738	8.51738	8.4619	8.52095	8.26627	8.43079	8.36776	8.63192	8.37321	8.36452	8.34171	8.57103	8.48226	8.326	8.1542	8.45625	8.433	7.93342	8.2335	8.339	8.025	8.3895	8.1815
ATP5PD	9.61786	9.95869	9.93095	9.8697	9.90369	9.87996	10.0107	9.96048	9.91262	9.89952	9.89952	9.9298	9.97786	9.86452	9.91095	10.015	10.02	9.90369	9.9666	9.90857	9.8596	9.81067	9.75667	10.036	9.85775	9.46033	9.7815	9.841	9.7215	9.72275	9.735
ATP5PF	8.85869	9.03778	9.13413	9.07357	9.16345	9.16345	9.12333	9.05532	9.225	9.01482	9.23417	9.03357	8.99762	9.11077	9.09667	9.06917	9.12905	9.02357	9.03179	9.22905	9.01482	9.525	8.96075	9.46033	9.06275	8.992	9.333	9.20813	9.00883	9.18112	8.89425
ATP5PO	9.74905	10.0165	10.0335	10.1052	10.02	9.98206	10.175	10.1077	10.0129	10.06	10.1102	10.0421	10.1452	10.0241	10.0654	10.0914	10.1236	10.071	10.1316	9.99905	10.1464	10.334	9.7745	10.0642	9.938	9.92015	9.95092	10.0498	9.91449	10.178	10.081
ATP6AP1	10.0441	9.5519	9.61368	9.23617	9.41988	9.51878	9.59837	9.375	9.50802	9.22579	9.56833	9.76343	9.54976	9.58071	9.22024	9.66194	9.51619	9.60863	9.53714	9.39071	9.43048	8.1135	8.866	8.40808	8.86663	8.593	8.76358	8.9335	9.09925	8.47867	9.111
ATP6AP1L	4.83527	5.11048	5.46585	5.4479	5.00107	5.12714	5.25126	4.89651	5.3467	5.1346	5.03211	4.62619	5.17349	5.36731	5.03587	4.78981	5.2544	5.14242	5.15512	5.39194	5.2606	6.22783	5.02867	5.46858	5.28083	5.34683	5.69893	5.40243	4.93683	5.65483	5.05933
ATP6AP2	8.69067	8.80952	9.36274	9.17619	9.1419	9.23417	9.07357	9.04952	9.15188	9.04976	9.08143	8.85381	9.27353	9.38857	9.04345	8.97312	8.97929	8.80571	9.17897	8.73405	9.25536	8.26575	8.655	8.37025	8.6235	8.43579	8.53875	8.66525	8.69525	7.9705	8.76267
ATP6V0A1	9.44048	9.32738	9.25619	9.01661	9.56258	9.51878	9.35476	9.59683	9.20952	9.60175	9.4427	9.91702	9.40373	9.63256	9.28325	9.57238	9.31992	9.09415	9.33333	9.57345	9.47587	8.61058	8.791	8.64	8.80517	9.0075	8.63263	8.9455	8.759	9.343	9.09325
ATP6V0A4	3.74754	3.74347	3.6719	3.82381	3.9954	3.78443	3.86571	3.81381	3.87317	3.85409	3.86913	3.8327	4.08849	4.04702	3.974	3.95238	3.75103	3.84095	4.12905	3.86119	3.85476	3.95	3.875	3.73225	3.95125	3.8845	4.088	3.8685	3.885	3.649	3.88633
ATP6V0B	9.63155	9.3719	9.26992	8.96667	9.27762	9.07095	9.1802	9.09667	9.16524	8.99839	9.28401	9.39333	9.07274	9.12393	8.97829	9.49119	9.24722	9.46762	9.19893	9.04012	9.17139	8.12925	8.613	7.962	8.5061	8.0945	8.348	8.495	8.52525	8.16125	8.671
ATP6V0C	11.3804	11.0517	11.2938	11.0811	11.3356	11.2412	11.5824	11.2412	11.4563	11.176	11.312	11.4057	11.0937	11.2602	10.9882	11.4502	11.3595	11.0874	10.9882	11.2602	11.0236	9.446	10.6057	10.151	10.5435	10.224	10.3276	10.5365	10.627	10.0815	10.7544
ATP6V0D1	7.12718	6.68349	6.84931	6.53784	6.65873	6.67246	6.90726	6.7323	6.84798	6.71276	6.75468	7.17135	6.65746	6.76159	6.51357	7.01976	6.76817	6.64829	6.60694	6.74655	6.7819	5.60067	6.02542	5.87771	6.0815	5.78321	5.962	6.21175	6.14973	5.57283	6.19493
ATP6V0D2	5.9156	5.41238	4.55546	4.90333	5.23016	5.61794	5.76706	5.46063	6.01468	5.29337	5.70405	6.36486	5.25357	5.79071	4.72111	6.5004	5.89466	5.19056	4.60152	5.81667	5.07893	3.495	4.55517	3.87683	4.38083	3.95083	4.088	4.47125	4.62083	4.0011	4.308
ATP6V0E1	8.8031	8.6046	8.81845	8.67063	8.91238	8.96937	8.96268	8.64071	8.82024	8.7901	8.88104	8.79794	8.53238	8.86262	8.58202	9.01821	8.81246	8.68135	8.78965	8.88104	8.83488	7.899	8.44367	8.45625	8.74575	8.083	8.6705	8.784	8.491	8.69671	8.4625
ATP6V0E2	5.24111	4.76877	4.7681	4.58504	4.82555	5.1229	4.93984	4.74087	4.81929	4.77131	5.14151	5.17175	4.54762	4.45528	4.82816	5.00569	4.94955	4.64427	4.91044	4.87488	4.80119	4.704	4.67608	5.2635	4.70875	5.1925	5.0915	4.8075	4.62083	5.06925	4.5265
ATP6V0E2-AS1	4.71715	4.88653	4.96762	4.92728	4.68349	5.06676	4.92028	4.97913	5.01697	4.87946	5.04952	4.91198	5.06041	4.815	4.91298	4.9396	4.78274	4.86405	4.88048	4.71048	5.08757	4.652	4.8075	4.7465	4.795	4.8725	4.89879	4.7455	4.70679	5.09372	4.684
ATP6V1A	8.88048	8.92881	8.57306	8.64395	8.77032	8.62183	8.60429	8.60747	8.86413	8.71155	8.61357	8.79794	8.50857	8.82915	8.35357	9.05143	8.80524	8.77381	8.30578	8.67508	8.65095	7.2744	7.516	7.5095	7.80229	7.073	7.7545	7.89	7.53567	7.63833	8.028
ATP6V1B1	3.87667	3.81671	4.03548	4.12935	3.62992	3.95143	3.80198	3.85825	3.795	3.69688	3.85	3.86671	3.86635	3.85463	3.87266	3.87817	3.85071	3.92028	3.94095	3.78087	3.69476	3.82	3.989	3.76275	3.90352	3.6685	3.942	3.8685	3.80783	3.7315	3.73933
ATP6V1B2	8.9481	8.21667	8.38298	8.1881	8.38774	8.4431	8.46095	8.43603	8.37321	8.4506	8.6375	8.73163	8.14329	8.405	8.27452	8.83862	8.41016	8.14563	8.44357	8.38679	8.34429	6.77267	7.5605	7.28333	7.437	6.9857	7.284	7.64967	7.4255	7.05192	7.9105
ATP6V1C1	8.0877	7.90024	7.84262	7.74321	7.8469	7.71048	8.03587	7.94405	8.02905	7.8954	7.90393	8.23714	7.8469	7.95353	7.62137	8.30627	8.04173	7.88833	7.6356	7.76262	7.71913	7.155	7.43592	7.0845	7.387	6.9495	7.184	7.40225	7.507	7.23975	7.60783
ATP6V1C2	4.87131	4.90516	4.65702	4.88143	4.94257	4.87555	4.75401	4.83762	4.96827	4.80906	4.90002	5.0023	4.92496	5.2031	4.81857	5.08127	4.82718	4.87282	4.68548	4.89079	4.85297	4.58875	4.72467	4.84017	4.676	4.69467	4.776	4.65633	4.817	3.9915	4.70233
ATP6V1D	6.94492	6.5341	6.73933	6.75927	6.89183	6.83099	6.88869	6.84119	7.0619	6.72155	6.82786	7.13167	6.63627	6.63246	6.63802	7.07762	6.68082	6.70742	6.67476	6.73571	6.48504	6.37633	6.494	6.39383	6.4915	6.36862	6.698	6.47304	6.5751	6.65317	6.42342
ATP6V1E1	6.52214	6.43413	6.55778	6.45563	6.6444	6.7548	6.63638	6.51546	6.7319	6.67105	6.73136	6.91484	6.38663	6.64183	6.57957	6.85155	6.6931	6.37639	6.77107	6.805	6.76659	6.47207	6.57823	6.9508	6.773	6.52897	7.0315	7.00833	6.596	6.9495	6.4855
ATP6V1E2	4.7625	4.62619	4.8119	4.74091	4.95857	4.60933	4.86222	4.78972	4.64214	4.78639	4.71825	4.62536	4.9102	4.61675	4.68833	4.59794	4.64266	4.62632	4.61528	4.69192	4.80119	4.8065	4.62467	5.18813	4.704	4.839	4.668	4.8405	4.6065	4.85662	4.8175
ATP6V1F	10.3075	9.87849	9.24722	9.35071	9.555	9.59417	9.585	9.68524	9.66381	9.57	9.6931	10.1316	9.51619	9.59683	9.29413	9.94524	9.72729	9.7104	9.38857	9.64452	9.65595	8.624	8.97425	8.68325	9.14775	8.491	8.855	9.127	8.95025	8.89675	9.2348
ATP6V1FNB	3.96714	4.00095	4.15079	3.94063	3.98762	4.22821	3.99427	4.02821	3.97419	4.08087	4.01143	4.18087	3.8273	3.76143	3.95347	4.04889	4.04933	4.12167	4.075	4.08968	4.1881	3.95	3.7625	3.61183	3.9315	3.98717	4.006	3.8012	3.9315	4.088	3.81695
ATP6V1G1	8.62286	8.642	8.89605	8.88104	8.84873	9.02452	8.85214	8.68738	9.06917	8.91591	8.91274	8.70119	8.58161	8.95421	8.72869	8.95238	8.84226	8.78825	8.80883	8.81563	8.91381	8.61058	8.3985	8.63113	8.6725	8.3475	8.5665	8.79875	8.32433	8.74575	8.303
ATP6V1G2	4.7625	4.65127	4.65702	4.59385	4.78111	4.52202	4.55324	4.77938	4.49147	4.68873	4.51544	4.47822	4.89359	4.62675	4.75667	4.66802	4.40881	4.68063	4.53373	4.69879	4.89048	5.11217	4.79777	4.43075	4.795	5.266	4.7455	4.85767	4.908	5.715	4.65775
ATP6V1G3	3.64262	3.77357	3.80397	3.54857	3.64857	3.67139	3.77238	3.84792	3.68881	3.99214	3.83071	3.67952	3.84611	3.82212	3.79756	3.58881	3.74103	3.68952	3.92143	3.74833	3.48802	3.67392	3.725	3.68955	3.7845	3.726	3.8725	3.90798	3.67	3.6705	3.689
ATP6V1H	5.90646	5.50833	5.83058	5.48266	5.81548	5.75776	5.71735	5.76687	5.93566	5.69056	5.86611	5.88966	5.46175	5.79071	5.49897	5.91756	5.72743	5.55603	5.78881	5.81667	5.56119	5.00183	5.28979	5.51503	5.3175	5.2875	5.5225	5.40717	5.28	5.46167	5.52783
ATP7A	5.6944	5.7929	5.95426	5.97056	5.75906	5.70992	5.97222	5.84921	5.77984	5.79105	5.77738	5.8059	5.92702	5.77075	5.81123	5.84595	5.84214	5.92274	5.89369	5.71544	5.92405	5.95825	5.89257	5.83875	5.997	5.98825	5.87572	5.847	5.96775	6.1031	5.82975
ATP8A1	7.10837	6.37659	6.72927	6.33119	7.02675	6.40371	7.07091	6.62024	6.32817	6.65871	6.73136	7.0431	6.86802	6.55603	6.41786	6.88071	6.46126	6.3953	6.33945	6.43028	7.01607	6.91483	6.60675	5.98792	6.607	6.626	6.08075	6.6365	6.64596	6.90883	6.563
ATP8A2	3.88127	4.13155	4.11913	3.87769	3.95484	3.81325	4.08852	4.02206	4.17373	3.95413	4.00262	3.89501	4.01663	4.10405	4.10905	3.84163	4.03659	4.07976	4.10944	3.99959	3.88948	4.5355	3.8115	3.88317	4.09967	3.9165	3.9025	3.89417	3.83217	4.1688	3.9645
ATP8B1	6.89135	7.09794	7.51262	7.64036	7.50508	7.49381	7.37131	7.23476	7.42972	7.25155	7.27556	6.79325	7.44587	7.51405	7.75111	6.91036	7.16976	7.19806	7.42345	7.51262	7.20476	8.082	7.678	8.326	7.7795	8.17575	8.28825	7.89	7.6655	8.2145	7.717
ATP8B2	4.48353	5.13371	5.53937	5.36389	5.16073	5.30984	5.33758	5.39127	5.37357	5.32373	5.11188	4.78274	5.48968	5.35548	5.29126	4.77913	5.19238	5.08155	5.28389	4.98956	5.21694	5.51042	5.834	5.5865	5.7635	6.04309	5.695	5.39567	5.76583	5.873	5.75433
ATP8B3	3.74754	3.8481	3.97246	3.78242	3.70246	3.9081	3.81921	3.58738	3.87317	3.87535	3.85984	3.77889	3.78198	3.82212	3.8081	3.98563	3.85071	3.65817	3.71119	3.71952	3.6202	3.761	3.7935	3.7205	3.9315	3.7575	3.82217	3.7815	3.777	3.6995	3.73933
ATP8B4	5.85806	5.90907	6.11582	5.92571	6.21594	5.81556	5.76706	6.04619	5.81413	5.89609	6.18639	5.76952	5.89349	5.84679	6.03177	5.68079	5.81536	5.8275	6.14905	5.94516	5.7669	4.96326	5.1515	4.4615	5.4715	4.95821	4.96575	5.44317	4.95437	4.94125	5.45233
ATP8B5P	4.42472	4.50643	4.36095	4.39667	4.63881	4.38198	4.37302	4.42786	4.44706	4.51452	4.40524	4.29405	4.56698	4.24413	4.42147	4.45929	4.31325	4.31952	4.40179	4.49929	4.22902	4.2155	4.3405	4.58628	4.305	4.505	4.5355	4.49413	4.30475	4.73142	4.29725
ATP9A	5.81287	5.9054	6.55778	6.52847	6.37485	6.33143	6.40456	5.87587	6.47305	6.18627	6.26976	5.81952	6.32841	6.5402	6.44214	6.00083	6.08464	5.9496	6.37143	6.76405	6.24516	7.0565	6.7105	6.93283	6.846	7.2675	7.16737	6.88508	6.803	7.248	6.57423
ATP9B	5.47516	5.51429	5.67302	5.53821	5.46259	5.6527	5.54143	5.64198	5.49675	5.50486	5.71728	5.94275	5.4854	5.63212	5.57683	6.01619	5.67651	5.48924	5.47897	5.57468	5.49056	5.3415	5.3825	5.48483	5.2345	5.406	5.31433	5.239	5.39511	5.4555	5.27325
ATPAF1	4.04718	3.94071	4.29071	3.90993	4.26667	4.09536	4.10833	4.11944	4.24742	4.17347	4.07052	4.11942	4.18749	4.34098	4.29881	4.02929	4.29905	4.05935	4.075	4.20169	4.00198	4.15571	4.1935	4.442	4.0335	4.4425	4.15508	4.2685	4.244	4.54667	4.36627
ATPSCKMT	5.4126	5.48984	5.31304	5.08789	5.28401	5.24392	5.08111	5.22246	5.01697	5.30294	5.19151	5.2848	4.95824	5.35548	5.16103	5.36984	5.25008	5.27067	5.17194	5.2849	5.30304	5.4285	5.131	5.08104	5.112	5.0365	5.1445	5.17725	5.022	5.65483	5.12567
ATR	6.67405	6.79198	6.70873	6.53784	6.65361	6.57448	6.68722	6.5249	6.49313	6.69508	6.54238	6.41476	6.6271	6.64183	6.68365	6.72335	6.74048	6.79893	6.77107	6.58929	6.76659	6.2455	6.379	6.702	6.337	6.116	6.31619	6.47304	6.4925	6.393	6.671
ATRAID	7.09802	6.78226	6.92802	6.57992	7.03976	7.05833	6.93405	6.63917	6.81659	6.74016	7.10337	6.81262	6.86802	6.84675	6.74775	6.77155	6.70381	6.78897	7.09437	6.94357	7.06667	6.88625	6.73142	6.9635	6.895	6.69	6.922	7.05775	6.72833	6.7275	6.69925
ATRIP	4.63262	4.46358	4.50373	4.53719	4.57373	4.65897	4.56631	4.60762	4.47932	4.5856	4.525	4.6154	4.42698	4.57131	4.71589	4.65317	4.64437	4.7606	4.68048	4.52738	4.66884	4.33917	4.43	4.50233	4.5965	4.4515	4.675	4.5285	4.565	4.4315	4.58037
ATRN	6.5573	6.6177	6.60942	6.86675	6.76905	6.91143	6.90726	6.91369	6.67708	6.97234	6.84698	7.06351	6.81869	6.86655	6.70529	6.89976	6.9219	6.63373	6.83143	6.73571	6.70619	5.70733	6.4425	6.26108	6.459	6.1415	6.36617	6.433	6.393	6.173	6.932
ATRNL1	4.15222	3.89381	4.22006	4.26466	4.17278	4.32187	4.38972	4.25571	4.39467	4.03444	4.30933	4.27198	4.12881	4.28611	4.18825	4.11627	4.09976	4.22574	4.30772	4.22762	4.27856	4.106	4.23192	4.65	4.46367	4.38975	4.5545	4.3815	4.155	4.874	4.0805
ATRX	5.49127	5.63536	5.76433	5.79787	5.72798	5.69377	5.71329	5.70226	5.7554	5.71774	5.71772	5.61881	5.76667	5.75724	5.72506	5.60409	5.67079	5.67159	5.60788	5.70111	5.69048	6.16825	5.94533	6.1045	5.79936	6.1125	5.99142	5.89075	5.81673	6.38933	5.8345
ATXN1	5.43192	5.3473	5.30833	5.37115	5.35252	5.55087	5.42988	5.41263	5.45188	5.44578	5.29738	5.4031	5.37861	5.39115	5.43476	5.48491	5.55222	5.27067	5.5131	5.50817	5.39719	5.45683	5.49317	5.44217	5.378	5.57083	5.48483	5.46017	5.36783	5.45142	5.33033
ATXN10	5.96857	5.87361	6.07821	6.08794	5.96567	6.04698	5.97591	6.14506	6.0531	6.08667	6.03274	6.18905	5.83173	5.9425	6.10794	6.20163	5.98016	5.95496	5.99818	6.05329	6.18885	6.37633	6.09583	6.20742	6.13575	6.32175	6.23425	6.1735	6.1915	6.5095	6.00157
ATXN1L	5.24563	5.18712	5.35829	5.55754	5.52206	5.4746	5.36762	5.42284	5.38918	5.53589	5.5902	5.27621	5.34437	5.57881	5.39173	5.54833	5.44186	5.31135	5.49504	5.52901	5.27381	5.42417	5.3015	5.747	5.431	5.49367	5.57067	5.6455	5.33592	5.324	5.27168
ATXN2	6.82079	6.73156	6.64135	6.40204	6.57722	6.4256	6.50391	6.41313	6.51137	6.44599	6.5573	6.40434	6.40881	6.49984	6.49103	6.48599	6.48175	6.69635	6.42024	6.57722	6.48504	6.43308	6.363	6.43758	6.28833	6.69667	6.2475	6.26108	6.4445	6.65967	6.51117
ATXN2L	6.78047	6.76786	6.82657	6.83563	6.6373	6.72101	6.68246	6.89052	6.75865	6.74619	6.69008	6.90302	6.80175	6.79583	6.77468	6.90381	6.78293	6.78365	6.77714	6.79032	6.7123	6.81683	6.6855	6.53692	6.60333	6.64967	6.61617	6.53188	6.61117	6.27767	6.60525
ATXN3	5.80062	6.34044	6.55198	6.59702	6.47055	6.4256	6.45171	6.59735	6.44706	6.52026	6.38371	6.32611	6.5869	6.51038	6.54976	6.23119	6.51187	6.31881	6.50275	6.2796	6.43095	7.25737	6.5865	6.61083	6.67	7.0215	6.51117	6.5715	6.623	7.32775	6.71288
ATXN3L	3.89817	3.89881	4.12107	3.82381	4.7194	3.71413	3.76143	4.11944	3.96381	3.91786	3.85	3.63702	4.25571	3.71841	3.71119	3.82748	3.73071	4.23377	4.08403	3.71952	3.90873	3.741	3.9785	4.4935	4.3105	3.8515	4.006	3.99117	3.575	3.782	4.4819
ATXN7	4.54111	4.27857	4.4454	4.64877	4.40762	4.60933	4.40079	4.55151	4.60095	4.42288	4.66183	4.47822	4.32693	4.37786	4.55358	4.59137	4.44091	4.3594	4.47778	4.41905	4.4073	4.4625	4.72467	4.78383	4.411	4.547	4.6936	4.5015	4.53483	4.55558	4.60017
ATXN7L1	5.92149	5.26635	5.17663	5.00087	5.06524	5.06676	5.09175	5.10214	5.06687	5.01976	5.11534	5.32157	5.05317	5.04151	5.10424	5.13371	5.12952	5.41001	4.95942	5.0531	5.244	4.822	5.08867	4.78383	4.8815	4.93933	4.861	5.009	5.1045	4.9855	4.91064
ATXN7L2	5.5071	6.0686	5.77758	6.79948	5.56629	5.61024	5.446	6.6569	5.86056	6.015	5.5825	6.50806	6.93405	5.41442	5.94619	5.98706	5.67079	6.35849	6.33071	5.55992	6.18313	6.1285	5.997	5.5935	6.5751	5.9785	6.276	5.83592	6.09233	5.39092	7.011
ATXN7L3	5.78685	5.81683	5.80849	5.71618	5.88944	5.6628	5.6181	5.8152	5.7974	5.58986	5.81929	5.79095	5.70925	5.59794	5.7166	5.98706	5.74724	5.88675	5.71828	5.84121	5.73952	5.15892	5.576	5.85542	5.68458	5.603	5.586	5.73051	5.448	5.44425	5.46217
ATXN7L3B	6.42127	6.37659	6.13929	6.07181	6.23762	6.01162	6.23077	6.08754	6.12558	5.85879	6.29722	6.02761	6.14881	6.23664	6.10286	6.12341	6.11762	6.33413	6.18639	6.40579	6.07726	6.014	5.8235	6.357	6.12592	5.9961	6.12742	6.0165	5.81358	6.1031	5.96933
ATXN8	5.01395	4.86556	4.79865	4.97792	4.9019	4.86353	5.00141	4.94093	4.81063	4.74302	4.90802	5.05292	4.92496	4.68518	4.82816	4.98394	4.63881	4.93901	4.71042	4.96119	5.08757	4.50967	4.60346	4.8815	4.93642	4.861	4.82921	4.928	4.70679	4.6935	4.547
ATXN8OS	3.61202	3.58833	3.64357	3.6727	3.67254	3.71413	3.76143	3.84792	3.71873	3.81377	3.59845	3.80319	3.50262	3.6146	3.7419	3.78365	3.6719	3.55048	3.70119	3.83159	3.59532	3.82	3.516	3.64958	3.609	3.7485	3.588	3.82917	3.659	3.4595	3.618
AUH	6.41163	6.20048	6.22992	6.25933	6.34944	6.04433	6.20637	5.97373	6.095	5.98377	6.26976	5.95991	6.12476	6.13147	6.16573	6.02665	6.16405	6.14905	6.0823	6.16397	6.09788	6.1735	6.1845	6.23875	6.1845	6.3855	6.35433	6.1845	6.1755	6.4925	6.1735
AUNIP	4.23238	4.0825	4.39778	4.20696	4.23563	4.21717	4.27087	3.98619	4.04675	4.03929	4.13996	4.02479	4.27897	4.30988	4.18825	4.18667	4.25857	4.28099	4.1475	4.16302	4.1881	3.67392	3.9585	3.773	3.922	3.87333	3.9745	3.88713	3.953	3.803	3.81695
AUP1	7.3281	7.27613	7.37738	7.43238	7.5246	7.59869	7.54841	7.33845	7.49768	7.49548	7.67563	7.73732	7.02363	7.64036	7.48595	7.8963	7.70262	7.21046	7.53369	7.55107	7.57405	6.8525	7.32083	7.09538	7.09958	6.93167	7.252	7.16575	7.369	6.8155	7.41383
AURKA	5.42284	5.08012	5.00952	5.05957	5.22048	5.1723	5.08111	5.07857	5.08044	4.97143	5.09341	5.09246	5.029	5.22014	5.06313	5.30463	5.20294	4.97143	4.76425	5.23575	5.08757	4.07142	4.442	4.27875	4.48017	4.108	4.53092	4.55158	4.40883	3.97025	4.59
AURKAIP1	8.22	8.16229	8.13143	7.83738	7.94179	7.93599	7.85828	8.07786	8.08024	7.98611	7.98095	8.20417	8.02377	7.8202	7.97033	8.09333	8.10786	8.2026	8.02349	7.97452	8.16556	8.03825	7.80229	8.21475	7.912	7.6715	8.03192	7.78033	7.78	8.0665	7.77925
AURKB	3.81836	4.02095	4.17127	4.11015	4.10266	4.29083	4.31952	4.28929	3.83369	3.97119	4.08213	4.28161	4.14901	4.37786	4.17708	4.22825	4.19786	3.80857	3.83857	4.19159	4.1881	4.029	3.967	3.941	3.843	3.6985	3.8725	3.961	3.8745	3.792	4.0805
AURKC	4.26167	4.06563	4.69766	4.12935	4.05399	4.38198	4.36774	4.28929	4.07781	4.20377	4.38853	4.41524	4.33722	4.16	4.11913	4.58008	4.19786	3.86119	4.21881	4.56746	4.10952	4.06417	4.1115	3.97267	4.1428	4.39533	3.995	4.164	4.012	3.92917	4.06367
AUTS2	5.18167	5.2874	5.33052	5.36841	5.32968	5.05569	5.23226	5.23873	5.19638	5.25088	5.22686	5.1669	5.18668	5.20726	5.51571	4.99024	5.14983	5.22238	5.19069	5.16095	5.26445	6.27065	5.68467	5.8235	5.5209	5.76583	5.6595	5.50233	5.6275	5.773	5.79875
AVEN	6.88071	6.89611	6.99361	6.985	6.95548	7.12186	6.99373	6.76444	7.15089	6.88389	7.07	6.60738	7.03333	6.86655	6.89512	6.93143	6.7626	6.93	7.19952	7.05159	6.92131	7.023	7.16425	7.78	7.40033	7.03212	7.8605	7.368	7.10892	7.145	6.92233
AVL9	4.85214	4.71437	4.85539	4.8006	4.77257	4.74754	4.97679	4.92329	4.78452	4.8522	4.86573	5.16167	4.64847	4.76234	4.55988	4.97913	4.86214	4.60024	4.8081	4.75127	4.59683	4.58433	4.78617	4.75233	4.45542	4.715	4.675	4.56683	4.68371	4.666	4.8815
AVP	4.96599	5.51944	5.45	5.00667	4.86747	5.00683	4.99183	5.01937	4.85433	5.16349	5.25867	5.11198	4.91513	4.65627	4.86913	5.15115	5.0404	5.46937	5.33173	5.16697	4.87838	4.6315	4.735	5.08104	5.24577	5.0365	5.2465	5.4175	4.77575	4.83988	4.78933
AVPI1	8.03	6.70619	6.68401	6.35167	6.86671	6.83639	6.64071	6.54734	6.64948	6.58773	6.8156	7.00317	6.28455	6.71755	6.52633	6.93591	6.84962	6.72262	6.77107	6.7777	6.74911	6.2655	7.34975	6.351	6.31608	6.81525	6.3386	6.29721	7.36175	6.8525	6.6345
AVPR1A	3.8573	3.95143	3.82381	3.82381	3.82071	3.63619	3.84845	3.84792	3.72685	3.89833	3.67224	3.86671	3.68714	3.86532	3.6879	3.66452	3.9619	3.86119	3.96119	3.55827	4.14167	3.771	4.43283	4.4825	4.2035	4.53767	4.33	4.33658	4.4405	5.39923	4.8495
AVPR1B	3.8573	3.86833	3.88802	3.78242	3.61024	3.88841	3.81921	4.04738	3.93456	3.82444	3.88881	3.9081	3.86635	3.99333	3.8614	3.87817	3.9619	3.88127	3.93159	3.99357	3.85476	3.931	3.8645	3.91983	3.669	3.81067	3.892	3.921	4.0355	3.97025	3.73933
AVPR2	3.92929	4.14111	3.98224	3.85603	3.8881	3.78443	4.07762	4.00429	3.82452	3.9081	3.86913	3.79077	3.9854	3.87619	3.79756	3.79447	4.14002	3.9298	4.06393	3.82183	3.90873	3.847	3.7365	4.03578	4.0655	3.97938	4.3	4.096	3.7575	4.148	4.0525
AWAT1	3.77875	3.76325	3.84409	3.82381	3.65762	3.72524	3.51143	3.70368	3.75659	4.01151	3.81131	3.58845	3.70286	3.69734	3.87266	3.61214	3.54643	3.72278	3.80494	3.64298	3.72643	3.564	3.90387	3.6995	3.95125	3.604	3.8325	3.547	3.9315	3.61742	3.74967
AWAT2	3.56024	3.65	3.51583	3.61214	3.63937	3.76667	3.74296	3.70368	3.73897	3.97119	3.64286	3.67008	3.7631	3.64601	3.72135	3.56738	3.6719	3.67167	3.815	3.70929	3.56833	3.82	3.7935	3.711	3.73567	3.604	3.74967	3.6005	3.84567	3.69038	3.457
AXDND1	3.93929	3.77357	3.79262	3.92008	3.37524	3.72524	3.84845	3.83635	3.95496	3.71883	3.78266	3.81252	3.99381	3.90614	3.92456	3.77369	3.70976	3.88127	4.90079	3.92857	3.75706	3.789	3.854	3.8465	3.556	3.6985	3.8017	3.921	3.90467	3.92917	3.699
AXIN1	5.13937	5.12227	5.38143	5.14698	5.47175	5.19497	5.40214	5.26743	5.4756	5.26274	5.41238	5.54631	5.39848	5.38742	5.30798	5.49091	5.44624	5.15571	5.39143	5.38143	5.20651	4.97267	5.34454	5.762	5.14967	5.3735	5.48483	4.995	5.3005	5.156	5.26767
AXIN2	4.23238	4.67475	4.86106	5.29087	4.88383	4.82461	4.75401	4.94093	4.97812	4.90206	4.7316	4.69027	5.11985	4.6954	5.16103	4.41951	4.79468	4.88944	5.00302	4.64494	4.77631	6.27617	6.00662	5.9785	6.26371	6.014	6.09942	5.83592	6.0223	5.7765	5.611
AXL	7.98524	7.7004	8.06214	7.995	7.81976	7.99833	7.77512	8.03587	7.78649	7.57405	7.91437	8.01714	8.03548	7.6919	7.70594	7.95	7.87976	7.61575	8.19952	7.97452	7.81095	7.7925	8.0575	8.37025	8.233	8.6175	8.29617	8.01667	8.0955	8.15275	7.95058
AZGP1	4.45929	4.65127	4.35087	4.53719	4.32901	4.01054	4.24177	4.68048	4.55853	4.57582	4.40877	4.44357	4.72714	4.17085	4.49143	4.27976	4.24087	4.48567	4.62762	4.40854	4.83341	4.36021	4.99297	4.58628	5.10267	4.923	5.20842	5.27	4.807	4.442	4.71817
AZGP1P1	3.80341	3.74762	3.84409	3.79595	3.88262	3.79968	3.85167	3.73748	3.74613	3.92333	3.88881	3.88857	3.83167	3.925	3.81405	3.84249	3.8031	3.76452	3.80494	3.68214	3.7069	3.8335	3.89697	3.931	4.23542	3.78317	4.13017	4.16	3.898	3.8305	3.80283
AZI2	6.095	5.97813	6.16746	6.10286	6.07476	6.04433	6.06145	5.97774	5.96913	5.99389	6.05499	6.08185	5.96115	5.90246	6.04667	6.0553	5.94611	6.09103	6.1219	6.03143	5.95246	6.13767	6.1425	6.20742	6.20055	5.9985	6.23101	6.21175	6.222	6.186	6.02835
AZIN1	7.51202	7.3523	7.20563	7.33079	7.02675	7.29476	7.11976	7.21476	6.98548	7.25155	7.4481	7.33397	7.09905	7.1179	7.30726	7.4194	7.38738	7.39202	7.44234	7.4221	7.3646	7.8075	7.27042	7.59725	7.284	7.155	7.2075	7.40225	7.331	7.606	7.32775
AZIN1-AS1	4.8027	4.75111	4.80567	4.94422	4.61528	4.49254	4.51161	4.73087	4.71715	4.82728	4.6325	4.75452	4.99833	4.55302	4.79942	4.76952	4.75369	4.71345	4.86968	4.69879	4.69933	5.2785	4.77021	4.849	4.817	5.09372	4.7455	4.8485	4.85917	4.92075	4.78025
AZIN2	4.84258	5.12662	4.95079	5.00667	4.75206	4.91429	4.9496	4.97913	4.86747	4.81333	4.83361	4.63698	4.78246	4.97738	4.79378	4.94869	5.23151	5.10959	4.91349	4.76439	5.20651	4.72533	4.6941	4.337	4.385	4.88233	4.82921	4.48983	4.9297	5.19992	5.13
AZU1	4.59956	4.13155	3.99262	4.21639	3.95024	4.39066	4.05746	3.89966	4.44706	3.85409	4.36932	4.34008	3.90614	4.24413	3.9931	3.95238	4.33968	4.11071	3.92143	4.23289	4.1201	4.17462	4.1495	4.129	4.0655	4.31055	3.995	3.98123	4.2045	4.52508	3.9645
B2M	11.1371	11.0517	11.5824	11.3521	11.6298	11.5824	11.6171	11.4919	11.5057	11.611	11.5277	11.5343	11.1438	11.5135	11.3176	11.6054	11.73	11.0577	11.1852	11.7421	11.6782	10.141	10.939	10.178	10.9315	10.4917	10.3823	11.08	10.9784	10.9175	11.131
B3GALNT1	6.14981	6.20048	6.27159	6.24968	6.15115	6.26617	6.02502	6.27233	6.26917	6.21877	6.39825	5.84033	6.31881	6.22559	6.23836	6.16746	6.36214	6.14905	6.22837	6.29629	6.0173	6.397	5.6024	6.30867	6.0355	5.8625	6.052	5.98758	5.6665	6.2201	5.99142
B3GALNT1P1	5.09214	4.54253	4.56575	4.3871	4.58512	4.62929	4.48208	4.40905	4.44706	4.37	4.59446	4.48825	4.48988	4.59404	4.36865	4.40976	4.40881	4.32881	4.53373	4.57702	4.44061	4.3915	4.057	4.3765	4.46133	4.14	4.0465	4.2575	3.885	3.865	4.32796
B3GALNT2	5.58758	5.88206	6.00315	6.1152	5.95548	6.04698	6.12234	5.42639	6.03495	5.75249	5.88752	5.77619	5.96115	6.01929	6.35107	5.88284	5.67079	5.77567	5.9031	5.88032	5.96321	7.1175	6.41737	6.632	6.67	6.92583	7.11558	6.66225	6.41833	6.40858	6.1275
B3GALT1	3.71048	3.69429	3.79262	3.82381	3.72881	3.74643	3.72317	3.72524	3.59369	3.6881	3.80198	3.755	3.72077	3.76143	3.71119	3.76238	3.75103	3.77452	3.72181	3.76101	3.78738	3.771	3.7625	3.742	3.7845	3.78917	3.82217	3.7505	3.72	3.782	3.7675
B3GALT2	3.96714	3.87865	4.15079	3.72683	3.84835	3.93992	3.98429	3.99392	4.16847	3.95024	4.11024	4.35071	3.7631	3.97333	3.9931	3.81631	4.15042	3.92028	4.11738	3.82183	4.03929	3.95733	3.7625	3.804	4.0875	4.022	4.2155	4.056	3.99467	4.148	3.931
B3GALT4	7.64452	7.88881	7.57583	7.76595	7.86121	7.96496	7.81143	7.83913	7.78649	7.76183	7.74363	7.91992	8.00048	7.8202	7.77095	7.60714	7.82897	7.71746	7.6501	7.92079	7.8006	7.3365	7.32083	7.54807	7.71317	7.4635	7.879	7.756	7.32117	7.42483	7.516
B3GALT5	3.70214	3.68365	3.70315	3.68714	3.70246	3.62929	3.72317	3.64246	3.70929	3.66429	3.71351	3.70286	3.67786	3.63262	3.65262	3.61214	3.70976	3.64881	3.61524	3.71952	3.74988	3.6815	3.6985	3.659	3.689	3.70567	3.709	3.64217	3.728	3.7205	3.70937
B3GALT5-AS1	5.17448	5.38766	5.26651	5.33179	5.09341	5.10718	5.1446	5.30246	5.12697	5.21786	5.19151	5.25353	5.15282	5.1374	5.2258	5.21052	5.15017	5.43153	5.32591	5.14211	5.31958	5.35967	5.187	5.22425	5.31175	5.35225	5.163	5.23525	5.18917	5.15058	5.204
B3GALT6	7.02321	7.3523	7.05429	7.15595	7.22845	7.1956	7.30024	7.23476	7.17056	7.26246	6.84698	7.29583	7.24381	7.18722	6.98333	7.15929	7.13706	7.36048	7.13437	7.16337	7.125	6.52117	6.57823	6.975	6.895	6.293	6.95429	6.7335	6.699	6.576	7.18
B3GAT1	4.36095	3.82776	4.27214	3.94063	4.2069	4.02978	3.51143	3.93238	3.97419	4.5197	3.74433	4.00397	3.71119	4.02929	3.53381	4.07929	3.91024	3.80857	3.815	4.36095	4.35107	4.14692	4.0375	3.7205	3.963	3.8	3.628	3.88713	3.895	3.85425	3.699
B3GAT2	4.58099	4.38945	4.70921	4.04127	4.37806	4.23976	4.29	4.06824	4.21857	4.18409	4.13996	4.19024	4.28786	4.01238	4.25964	4.30933	4.27794	4.36738	4.20869	3.99357	4.29389	4.27329	4.20937	4.36657	4.1635	4.3195	4.2155	4.31683	4.2345	3.85425	4.2775
B3GAT3	7.67024	7.68794	7.55885	7.28897	7.24008	7.2523	7.43702	7.43452	7.25861	7.11381	7.38202	7.32496	7.61619	7.36194	7.30726	7.35516	7.36135	7.68909	7.44234	7.22357	7.46889	7.084	7.135	7.06358	6.99217	7.3145	7.073	6.977	7.226	7.01425	7.37371
B3GLCT	5.73762	5.71606	5.53937	5.08789	5.11281	5.19497	5.00141	5.00921	5.19224	5.6696	5.75202	5.54631	5.60175	5.0472	5.12931	5.36085	5.0404	5.73952	4.57243	5.60675	4.31905	5.12221	5.17467	5.6335	5.52983	5.5655	5.89967	5.587	5.1195	4.4935	5.3745
B3GNT10	4.27976	4.46643	4.57592	4.47655	4.36774	4.54901	4.435	4.39877	4.41262	4.59498	4.2699	4.58845	4.35378	4.38796	4.42576	4.45385	4.33968	4.56026	4.39738	4.0619	4.39623	4.312	4.2805	4.235	4.28967	4.38433	4.191	4.18475	4.1465	3.9795	4.17308
B3GNT2	6.82079	5.73754	5.6959	5.38369	6.02452	5.74762	6.10937	5.56	5.89595	5.51371	5.96778	6.12298	5.66798	5.66012	5.30798	6.06916	5.75659	5.7502	5.4031	5.73294	5.65643	4.61	4.89242	5.04213	5.41283	4.778	5.25517	5.45425	4.8265	5.0259	4.9883
B3GNT3	4.23238	4.55438	4.15952	4.3423	3.91363	4.11508	4.12494	4.23421	4.08762	4.33	4.02103	4.07952	4.01286	4.95014	4.11913	4.41951	4.09976	4.61683	4.36512	4.14532	4.13087	4.029	3.9785	4.129	4.48017	3.9585	4.0365	4.4515	3.9315	3.7315	4.37542
B3GNT4	3.91786	3.74347	4.00286	3.92008	3.80444	3.93992	3.70214	3.70368	3.64152	3.89833	3.7236	3.85528	3.8073	3.84279	4.02238	3.57762	3.82071	3.73327	3.71119	3.79069	3.6202	3.64567	3.6615	3.6995	3.823	3.628	3.8435	3.678	3.895	3.9915	3.78717
B3GNT5	6.57698	6.52214	6.35413	6.41292	6.52597	6.4381	6.38167	6.60317	6.47305	6.52026	6.51032	6.22833	6.36762	6.27865	6.36583	6.43413	6.28159	6.54988	6.61369	6.37478	6.45937	5.203	5.93	5.0595	5.57275	5.7325	5.31987	5.6955	5.9785	5.37208	6.02835
B3GNT6	3.77875	3.86833	3.90952	3.95956	3.8881	3.78443	3.99427	3.57762	3.78595	3.80397	3.92058	3.94881	3.7381	3.85463	3.78619	3.83828	3.91984	3.80857	3.89952	3.88155	3.70286	3.69133	3.6445	3.68955	3.9315	3.6395	3.74967	3.82033	3.90467	4.0785	3.659
B3GNT7	5.59743	5.38921	5.08333	5.18668	5.18075	5.12619	5.32157	5.16351	5.17542	5.07824	5.30714	5.56081	5.08187	5.12679	5.01976	5.51429	5.20886	5.32099	5.34548	5.3551	5.15103	5.09567	4.97867	4.97867	5.02542	4.94983	5.02437	4.861	5.0365	5.05033	5.09783
B3GNT8	7.69048	6.70274	7.02363	6.67643	7.01683	6.81033	7.2181	6.95772	7.03155	6.70421	7.05159	7.34548	7.05833	6.64183	6.46152	7.1823	6.91143	6.65323	6.75225	6.78341	6.56794	5.7445	6.06992	5.55733	6.44925	6.04309	6.1554	6.323	6.13211	5.705	6.05422
B3GNT9	5.70925	5.3575	5.57359	5.60159	5.50619	6.02262	5.54536	5.51937	5.7869	5.6696	5.64526	5.38192	5.65782	6.02444	5.57683	5.39143	5.82571	5.33587	5.96079	5.84121	5.43357	5.9505	5.47788	5.86425	5.901	6.06378	5.959	6.0165	5.734	5.853	5.82371
B3GNTL1	5.33683	5.23016	5.15956	5.1377	5.18075	5.22258	5.03048	5.05851	4.84254	5.12255	5.02854	5.19881	4.84845	5.0472	4.96694	5.22442	5.1131	5.19056	4.97347	5.03048	5.35389	4.17462	4.77952	4.57683	4.63587	4.3765	4.372	4.633	4.8265	4.129	4.75105
B4GALNT1	5.55302	5.88736	4.6369	5.7558	5.44306	5.73762	5.87702	5.64821	5.64706	5.30294	5.25867	5.69381	6.03754	5.85833	5.4225	5.55841	5.88175	5.83667	5.67366	5.60675	5.525	5.09058	5.24267	5.23967	5.4715	5.02706	5.586	5.4175	5.55592	4.77804	5.1835
B4GALNT2	3.92929	3.8576	3.93119	3.78242	3.67254	4.00095	4.01802	4.02821	3.66194	3.72825	3.99214	3.92837	3.7381	3.83325	3.96286	3.82748	3.89944	3.76452	3.83857	3.82183	4.08968	4.15571	3.604	3.6995	3.95125	3.7785	3.95438	3.8012	3.942	3.85425	3.81695
B4GALNT3	3.72524	4.07909	3.87171	3.89302	3.80444	3.83476	3.87905	3.83058	3.83865	3.81877	3.85984	3.86976	3.90952	3.79563	3.88881	3.88317	3.83476	3.96272	3.94845	3.83712	3.84054	4.0845	3.8275	4.10375	3.89617	4.0735	3.917	3.89367	3.885	4.12533	3.922
B4GALT1	6.22881	6.08554	6.08385	6.06361	5.86821	6.14011	5.67897	6.04619	5.86056	5.92534	5.92093	6.31905	6.00071	5.9068	5.83764	6.14475	5.87305	6.16762	6.05802	5.90492	5.77687	5.01133	6.3595	5.57637	5.804	6.105	5.7835	5.76715	6.35858	5.344	5.804
B4GALT2	6.83103	6.96462	7.03381	6.93751	6.98548	7.1473	7.03357	6.97573	7.10643	6.77667	6.9119	6.86976	7.02363	6.94583	6.98333	6.79976	6.88929	7.09726	7.19952	6.87895	6.91341	6.59633	7.06383	7.4155	6.815	7.10262	7.12725	6.87925	7.10892	6.89775	6.9435
B4GALT3	6.91357	6.58929	6.5309	6.47048	6.57246	6.61528	6.72706	6.54734	6.53394	6.59238	6.62919	6.78921	6.35902	6.6373	6.69321	6.72101	6.62171	6.5781	6.5486	6.67476	6.74911	6.12183	6.44861	6.331	6.13575	6.514	6.45838	6.23617	6.4855	6.4785	6.41317
B4GALT4	5.68869	5.20726	5.61655	5.48266	5.545	5.42163	5.59897	5.51937	5.52901	5.40603	5.63389	5.55786	5.56992	5.56119	5.57683	5.54833	5.47667	5.47607	5.81944	5.63881	5.55333	5.58742	5.62233	6.076	5.74283	5.753	6.09942	5.847	5.85	5.89683	5.695
B4GALT5	7.86974	7.52905	7.62659	7.32099	7.18786	7.26246	7.35357	6.96758	7.74976	7.5654	7.36175	7.655	7.01312	7.41214	7.285	7.30595	7.15917	7.46921	7.09437	7.46381	7.34563	6.28733	7.09683	6.804	6.62533	7.08267	7.0115	6.58575	7.07725	7.1175	7.349
B4GALT6	3.73992	3.51929	3.90952	4.32048	3.84835	3.82762	3.88726	3.68612	3.85326	3.72825	3.77298	3.76738	3.96466	3.6019	3.8614	3.83828	3.78252	3.76452	3.815	3.72968	3.87825	3.64567	3.6865	4.07467	3.8325	3.895	3.58	3.729	3.8265	4.138	3.73933
B4GALT7	5.44186	5.46972	5.53937	5.53202	5.705	5.75776	5.79784	5.74619	5.72995	5.7575	5.83558	5.86738	5.40536	5.71553	5.77718	6.08675	5.79095	5.3806	5.81944	5.71083	5.55333	5.25871	5.64239	5.86425	5.48058	5.5425	5.614	5.6455	5.61696	5.236	5.57688
B4GAT1	5.89587	5.88736	5.81903	5.81552	5.92093	6.0349	5.80832	5.86433	5.87256	5.76706	5.92958	5.67516	5.52238	5.81413	5.90954	5.78087	5.84821	5.83667	5.9431	5.94516	5.72964	5.79625	5.844	5.66633	5.92576	6.105	6.09233	6.07704	5.75475	6.2201	5.88983
B9D1	5.93603	5.38921	5.37016	5.08789	5.2874	5.57813	5.59437	5.15869	5.63187	5.15212	5.42778	5.60968	5.48143	5.20849	5.4127	5.56554	5.18009	5.41496	5.40785	5.50428	5.29472	5.4795	5.34117	5.71142	5.2345	5.28983	5.51583	5.34327	5.29208	5.29367	5.0755
B9D2	7.03155	7.02222	6.63658	6.88879	6.80619	6.81033	6.75774	6.39246	6.74198	6.82294	6.73136	6.83095	6.94508	6.8046	6.82786	6.87338	6.77361	7.07619	6.82213	6.70381	6.89071	5.84942	6.503	5.8345	6.106	6.08533	6.212	6.23617	6.47	5.95062	6.392
BAALC	4.85964	4.6625	4.68353	4.59956	4.75722	4.68813	4.64905	4.64202	4.78026	4.61048	4.65816	4.84889	4.55358	4.69933	4.62929	4.66115	4.73379	4.68698	4.46464	4.61196	4.59683	4.17275	4.19625	4.39075	4.465	4.24167	4.3915	4.348	4.35375	4.50125	4.51967
BAALC-AS1	4.0765	4.01405	4.07164	4.19373	4.08079	4.18223	4.1031	3.92214	3.89827	4.0019	3.9749	3.88857	3.88548	4.01238	4.02238	3.83171	4.06873	3.85675	3.98656	3.91548	4.03444	4.16342	3.9405	4.29	4.138	4.0735	4.305	4.062	4.09575	4.48	4.10636
BAALC-AS2	6.94492	6.22139	5.6959	5.62007	5.7456	5.60175	5.56482	5.49905	5.44677	5.71133	5.78881	6.22833	5.77248	5.44578	5.53139	6.06916	5.60806	6.13048	5.75667	5.74484	5.82832	8.029	5.576	5.8142	5.52983	5.42883	5.79413	5.42775	5.448	5.061	5.165
BAAT	3.83857	3.59857	3.9623	3.82381	3.83905	4.09536	3.92556	3.67214	3.77508	3.7831	3.67224	4.09754	3.8273	3.95413	3.62056	3.68714	4.01238	3.71224	3.50595	3.88155	3.6023	3.9135	3.854	3.61183	3.843	3.86163	3.678	3.65	3.79567	3.917	3.70937
BABAM1	7.44063	7.55972	7.41327	7.27179	7.44524	7.36524	7.20786	7.3169	7.46484	7.41351	7.42381	7.57238	7.28944	7.30381	7.47611	7.48484	7.5066	7.53008	7.3269	7.43262	7.55865	7.191	7.39258	7.6445	7.263	7.1385	7.431	7.25	7.226	7.383	7.09033
BABAM2	6.5669	6.37659	6.33881	6.37313	6.19095	6.36767	6.35989	6.33512	6.2794	6.41208	6.38794	6.58282	6.23996	6.52901	6.40754	6.43413	6.37702	6.37639	6.3204	6.37478	6.2273	6.2035	6.53533	6.2775	6.26371	6.393	6.23101	6.3145	6.47	6.35883	6.21254
BACE1	6.86187	6.73643	7.11833	7.03298	6.88619	7.30952	7.01925	6.84698	7.07631	6.86667	6.86671	6.83095	7.07488	7.21698	6.89512	6.65746	6.91143	6.82079	7.12254	6.85897	6.98171	6.98483	6.97583	7.15567	7.1605	6.99687	7.20133	7.18167	7.01567	6.60267	7.27542
BACE1-AS	4.29	4.61933	3.99262	4.41619	4.33903	4.39066	4.31952	4.71214	4.34206	4.54008	4.38853	4.15008	4.51161	4.38796	4.45127	4.38029	4.49	4.53817	4.52405	4.15401	4.51758	4.53167	4.3795	5.2635	4.58875	4.5305	4.82921	4.55158	4.311	4.463	4.7287
BACE2	8.34222	8.642	8.24563	8.67925	8.33365	8.39127	8.14563	8.49738	8.12333	8.07917	8.42738	8.37917	8.28548	8.22048	8.27452	8.09333	8.14135	8.69321	8.6025	7.97452	8.00048	7.95325	8.7095	8.54133	8.2515	8.3705	8.19983	8.166	8.827	8.0935	8.6545
BACH1-AS1	4.17857	3.90976	4.12107	4.24871	4.08079	4.14992	4.29	4.1679	3.92552	4.04913	4.20746	4.04722	4.09905	3.96317	4.30857	4.27976	4.14002	4.25208	4.15788	4.12525	4.10952	4.255	4.23192	4.19458	4.1635	4.24567	4.19825	4.155	4.13658	3.97025	4.266
BACH1-IT1	4.41516	4.61008	4.79865	4.68929	4.54127	4.41675	4.6159	4.60762	4.49147	4.5856	4.49929	4.54849	4.62925	4.57131	4.45127	4.6273	4.40881	4.50683	4.28857	4.3402	4.86636	4.2155	4.7455	4.695	4.28967	4.1735	4.42317	4.23583	4.72717	4.4838	4.70233
BACH1-IT2	3.89817	3.89881	3.7131	4.1196	3.86825	3.84881	4.21449	4.17754	4.10905	5.07185	4.08213	4.02479	4.11837	4.02929	3.85167	4.43152	3.60837	3.93929	3.79505	4.51452	4.24675	3.8385	3.9405	3.85775	4.0875	3.86163	3.922	3.7505	3.9745	3.81433	4.1305
BACH1-IT3	4.20952	4.44123	4.7681	4.63881	4.4177	4.41675	4.67421	4.80982	4.47494	4.57582	4.36932	4.78274	4.75676	4.45528	4.64488	4.51183	4.4002	4.46571	4.42861	4.37171	4.39623	4.1945	4.59437	4.4205	4.2035	4.3195	4.006	4.14658	4.56867	4.01933	4.89075
BACH2	4.01286	4.10024	4.19786	4.23119	3.99252	3.97171	4.17881	4.09869	4.26048	4.14119	4.01143	3.93429	3.9854	4.0773	4.41619	3.90502	4.08968	4.04913	4.13313	4.03929	4.03047	4.121	4.4525	5.31242	4.0433	4.7735	4.47233	4.3	4.3595	4.79379	4.32796
BAD	5.89587	5.73754	5.49829	5.64135	5.79821	5.86532	5.8004	5.7296	5.81413	5.54131	5.80602	5.89758	5.82294	5.78377	5.75978	5.84329	5.765	5.73952	5.84631	5.84984	5.55333	5.92117	5.734	5.90328	5.7225	5.856	5.847	5.62921	5.66467	5.9585	5.706
BAG1	7.69341	7.80825	7.57135	7.88397	7.98937	7.97587	8.08079	7.94712	7.95111	7.8963	7.97587	8.14135	7.90333	7.81651	7.95421	7.915	7.9402	7.88246	7.95111	7.90889	7.81778	8.11842	8.06183	8.39667	7.84883	8.03233	8.12737	7.87133	8.10067	8.40017	7.93567
BAG2	6.52214	6.1426	6.46937	6.39393	6.6444	6.77857	6.38167	6.26405	6.75167	6.26905	6.42659	5.95991	6.06715	6.43413	6.62726	6.2924	6.30238	6.25546	6.83143	6.77361	6.29452	8.082	7.34232	8.12	7.65044	7.65075	8.419	7.674	7.176	7.606	6.5855
BAG3	5.71908	5.55302	5.90246	6.00492	5.76607	6.19462	5.95452	5.94524	6.25016	5.92534	6.03694	5.79956	5.84282	6.07448	6.05222	5.95385	5.91615	5.63881	6.16708	6.00746	5.70865	5.78764	6.57823	6.7285	6.1545	7.12825	6.84608	6.381	6.70633	6.2835	6.29325
BAG4	4.79808	4.73764	4.34774	5.0187	4.78691	4.75722	4.69147	4.64708	4.67347	4.68537	4.77427	4.80302	4.58056	4.80236	4.68833	4.77446	4.77929	4.70476	4.58869	4.85462	4.64107	4.61633	4.72467	4.9904	4.86225	4.797	4.86892	4.8485	4.73267	5.01633	4.4819
BAG5	6.88071	6.88071	6.69502	6.73804	7.02675	6.89976	6.72706	6.76444	6.89762	6.91444	6.97476	6.68391	6.5669	6.81448	6.80819	7.00595	6.74048	6.84071	6.84405	6.98052	6.65792	6.659	6.514	7.18833	7.00171	6.74042	7.0835	7.118	6.566	7.195	6.8405
BAG6	9.0506	9.04952	8.88437	8.80155	8.93063	8.8898	8.82179	8.93702	8.8873	8.81988	8.8604	9.01988	8.91012	8.98236	8.99702	8.94679	8.90631	9.04262	8.89333	8.89183	9.05226	8.3485	8.6345	8.865	8.48775	8.77283	8.705	8.56225	8.6745	8.807	8.887
BAGE	4.52095	4.64619	4.93139	5.015	4.83794	4.72382	4.75401	5.01467	4.79821	5.06515	4.74103	4.83914	4.9306	4.76234	4.72857	4.84162	4.80064	4.55071	4.69291	4.71048	4.85297	4.958	5.048	4.8075	4.848	5.06775	4.82533	4.7615	5.1045	5.13825	5.165
BAGE4	4.54111	4.90516	5.14849	5.19548	4.96694	5.06676	5.03048	5.28829	5.06687	5.08278	4.70206	5.05292	5.08187	5.02587	4.95637	5.11569	5.04903	4.88063	4.9406	4.815	4.99013	5.048	5.418	5.03342	5.10267	5.55467	4.96575	4.91717	5.2226	5.57675	5.25558
BAHCC1	5.83532	6.55524	5.97135	6.21881	5.67262	6.0349	5.80832	6.06754	5.94652	5.87607	5.81016	5.39154	6.16746	6.10476	6.13591	5.48157	6.08464	6.59714	6.18639	5.84121	5.71813	5.931	5.7665	6.4588	5.8445	6.52897	6.167	5.847	5.74467	6.2201	6.24525
BAHD1	7.30857	7.2477	7.0725	7.04924	7.2831	7.12186	7.13333	7.08913	7.1329	7.04821	7.12214	7.13167	7.12048	7.14929	7.03357	7.22992	7.06571	7.19806	7.01976	7.09726	7.03798	6.718	6.8825	6.9245	6.84958	7.1385	6.896	6.815	6.8695	6.9495	6.89629
BAIAP2	6.06724	5.51944	5.09778	5.07956	5.51032	5.36437	5.41456	5.38556	5.29669	5.3904	5.26187	5.76952	5.31796	5.40385	4.9276	5.54278	5.45083	5.41698	5.27905	5.11022	5.28401	5.01783	5.00517	4.46682	4.97387	5.364	4.9325	4.90392	5.08162	4.71433	5.00525
BAIAP2-DT	6.72937	7.03095	6.80633	6.82095	7.08151	6.97357	6.98488	6.92538	6.89762	7.0604	6.94444	6.99357	7.15917	6.76728	6.80042	6.78151	7.00595	7.00337	6.84405	6.842	6.86857	5.4285	6.00662	5.0505	6.09535	5.55467	5.60383	6.2655	5.99817	5.05033	6.51458
BAIAP2L1	4.41516	4.10024	4.13119	3.95442	3.76317	4.0777	3.84845	3.93238	3.91363	3.98532	3.92611	4.18087	3.99929	4.02117	4.02238	3.94786	4.06478	4.15786	4.06921	4.19159	3.94283	4.4905	4.0105	3.9795	4.0995	4.1255	4.16783	4.08767	4.012	4.13323	4.13713
BAIAP2L2	4.43575	4.46358	4.32016	4.5271	4.4177	4.43317	4.62762	4.48103	4.41262	4.4996	4.39921	4.56919	4.60984	4.45075	4.48063	4.51627	4.45593	4.60984	4.49135	4.65964	4.43448	4.312	4.50121	4.31683	4.72133	4.49413	4.516	4.5565	4.56867	4.47017	4.26983
BAIAP3	3.79833	3.98167	4.08849	3.95002	4.11393	4.2069	3.93588	4.04738	4.10905	3.9081	3.80198	3.91786	4.06762	4.0773	4.04944	3.75143	4.00194	3.77452	3.93159	3.76101	3.81976	4.13792	4.25142	3.91983	4.3	4.26833	4.098	4.107	4.28033	4.2165	3.982
BAMBI	6.91357	6.91405	7.38897	6.61079	7.39202	7.59869	7.35357	6.89548	7.76992	7.13996	6.83905	6.41476	6.69167	7.41214	7.53286	6.53056	7.07746	7.04016	7.04008	7.27024	7.20476	9.09925	7.587	9.04675	8.12025	8.3565	9.7705	8.2055	7.6795	7.91437	7.77925
BANF1	7.79722	7.2673	6.90452	6.60155	6.72029	6.7329	6.61452	6.48778	6.68529	6.31576	6.79119	6.55671	6.6271	6.84675	6.79119	6.77155	6.72258	7.24048	6.95512	6.83218	6.85008	6.68908	6.74175	7.31783	6.55283	6.85883	6.896	6.6089	6.90833	6.994	6.392
BANF2	3.88738	3.86833	3.66294	3.72683	3.86825	3.80545	3.60103	3.41952	3.86394	3.92857	3.77298	3.8327	3.90614	3.77115	3.96286	3.72992	3.56792	3.91024	3.84948	3.66452	3.80397	3.552	3.594	3.68	3.6385	3.9165	3.6385	3.85029	3.67	4.01063	3.659
BANK1	4.17857	4.39833	4.39778	4.59385	4.26667	4.23976	3.95611	4.20706	4.64778	4.60667	4.20746	4.19024	4.28786	4.36095	4.29881	4.06857	4.27794	4.32881	4.11738	4.38905	4.31905	3.80983	4.029	4.2045	4.401	3.87333	4.1365	4.48	3.985	3.792	4.195
BANP	5.88123	5.89397	6.05286	6.07181	6.00963	6.10016	6.09314	6.04619	6.17595	6.205	6.02593	6.17325	6.0484	6.05024	6.0971	6.08333	6.21983	5.94476	5.98157	6.01317	6.03405	5.91708	6.11667	5.753	5.61183	5.95466	5.75067	5.625	6.0305	5.81359	6.10717
BAP1	5.9156	5.85627	6.33881	6.32087	6.32794	6.498	6.43095	6.3603	6.37909	6.35369	6.46972	6.49829	5.96548	6.3759	6.42929	6.6069	6.47319	5.86798	6.64583	6.54762	6.38456	6.116	6.05067	6.68	6.348	6.34933	6.7405	6.48167	5.94	6.349	6.41317
BARD1	5.46063	5.4223	5.17151	5.36389	5.545	5.06676	5.60722	5.35992	5.44677	5.30294	5.25867	5.29576	5.40536	5.31421	5.56861	5.39143	5.42504	5.37095	5.4031	5.1459	5.35389	6.32967	5.71967	6.3188	5.56017	6.053	6.03217	5.40717	5.5209	6.62067	5.65925
BARHL1	3.64262	3.77357	3.97246	3.88881	3.70246	4.00095	3.77238	3.93238	3.81405	3.71883	4.13996	3.97171	3.84611	3.64601	3.93369	3.8892	3.79222	3.92028	3.815	3.81214	4.39623	4.117	3.7845	3.87683	3.86375	3.895	3.8125	4.0175	4.13658	4.069	3.86592
BARHL2	3.82859	3.6719	3.74425	3.87769	4.09167	3.87833	3.89714	3.83635	3.83369	3.7831	3.88881	3.76738	3.91585	3.81214	3.78619	3.80488	3.81214	3.71224	3.55389	3.82183	3.61171	3.63342	3.8115	4.0875	3.8525	4.03567	3.82217	3.8685	3.777	3.7205	4.17308
BARX1	4.58099	3.91976	3.54952	4.16795	3.77556	3.67139	3.70214	3.88931	3.94505	3.98063	3.76258	3.63702	3.78198	4.46532	3.93369	3.79447	3.62857	3.73327	4.77394	3.49548	3.86244	3.495	3.8435	3.866	3.86375	3.726	3.515	3.7815	3.80783	3.92917	3.699
BARX2	3.64262	3.89881	3.7831	3.97024	3.85706	3.84881	3.86571	3.75897	3.90254	3.82444	3.7046	4.19893	3.81643	3.77115	3.8081	3.89938	3.76143	3.97333	4.04238	3.60111	3.86244	3.6815	3.52975	3.87683	3.812	3.6775	3.932	3.82033	3.9315	3.93933	3.73933
BASP1	9.56087	9.04952	9.0656	8.86614	9.1802	8.67873	9.23067	8.72963	8.85381	9.03952	9.25063	9.39333	8.85549	8.59071	8.57345	9.05143	8.642	9.05532	8.78965	9.0506	8.89925	8.326	9.12805	8.68325	8.53383	8.635	8.63263	8.57275	9.1655	8.421	8.5535
BASP1-AS1	3.69152	3.89333	3.8931	3.68183	3.98254	3.79901	3.91714	3.64246	3.90905	3.94598	3.88016	3.84905	3.64175	3.70349	3.66849	3.76759	3.72579	3.97008	3.80997	3.78381	3.9277	3.76617	3.875	3.76967	3.70117	3.85533	3.75517	3.99467	3.86833	3.7664	3.75367
BASP1P1	5.7669	5.29345	5.33984	5.14698	5.0554	4.99758	5.24402	5.38135	5.06687	5.25088	5.18183	5.47165	5.15282	4.80236	4.72857	5.50825	4.96897	5.29897	5.00302	5.12448	5.02187	5.0365	5.28	4.95	4.96067	5.1445	5.01602	4.7455	5.2325	4.75717	4.89075
BATF	8.21155	8.11179	8.04722	7.87976	7.94179	7.86524	8.39179	8.19317	7.77745	8.4892	7.97095	8.56174	8.17145	7.6819	7.62905	8.2844	8.04908	8.10937	7.74952	7.9602	8.34429	5.9595	7.33192	6.1655	7.3195	5.59292	6.51117	7.285	7.25242	5.86283	7.0815
BATF2	6.01409	6.03333	6.47671	6.13147	5.80608	6.14011	6.02502	5.84313	6.22968	6.3427	5.93823	5.9073	6.43833	6.03631	6.11383	5.72071	6.15491	5.89595	5.6044	6.05989	6.27367	5.12221	5.09817	5.09187	5.40281	5.625	5.176	5.46667	5.3745	4.9855	5.507
BATF3	6.4004	6.43413	6.43119	6.32087	5.89754	6.52847	5.92313	6.2826	6.11582	6.24833	6.30929	6.29319	6.48887	6.29956	6.68365	6.28119	6.0734	6.34532	6.31	6.3181	6.25667	5.45067	6.48325	6.1045	6.17383	6.32938	5.92992	6.15517	6.393	6.43367	6.09829
BAX	7.19587	6.90992	6.89488	6.89262	6.80214	6.77405	6.86337	6.89	6.81659	6.8325	6.81103	6.90302	6.89222	6.70548	6.69321	6.95952	6.88071	7.00337	6.895	6.76929	6.83119	6.0486	6.415	6.116	6.433	6.222	6.4775	6.45053	6.48058	5.844	6.63975
BAZ1A	6.4004	6.55524	6.44138	6.34127	6.28687	6.19462	6.2765	6.39246	6.33841	6.43278	6.13196	6.27492	6.25937	6.39802	6.16573	6.28119	6.33469	6.5089	6.105	6.13028	6.50405	5.6235	6.1955	5.8142	5.81442	5.851	5.89967	5.89667	6.201	6.274	6.05422
BAZ1B	7.45044	7.1675	6.91127	7.06381	7.09837	7.01579	6.86746	6.97573	7.1329	6.96254	7.09095	6.8556	7.03333	7.01746	7.02752	6.93143	6.96774	7.24048	7.04472	6.99909	7.0303	7.20683	7.04683	7.18208	6.99217	7.18723	7.063	7.0285	6.946	7.236	6.74433
BAZ2A	5.89587	6.0028	6.15976	6.1404	6.13048	6.18365	5.95452	6.27233	6.14532	6.18206	6.08868	6.04762	6.06715	6.26845	6.26905	6.09595	6.09627	6.02167	6.06952	6.19656	6.16329	6.05521	6.285	6.3188	5.9535	6.71233	6.052	6.14467	6.13211	6.20863	6.29325
BAZ2B	5.73762	5.62016	5.70811	5.56925	5.7456	5.53667	5.59897	5.37079	5.45476	5.58077	5.525	5.39154	5.36242	5.70603	5.51909	5.40262	5.64032	5.59171	5.4756	5.66567	5.67504	5.92117	5.335	5.78158	5.4365	5.576	5.67567	5.635	5.264	6.0735	5.41729
BBC3	7.1777	7.61381	7.99988	7.6501	7.7081	7.78218	7.73246	7.63984	7.61571	7.69294	7.86298	7.83143	7.88833	7.75837	7.51452	7.56619	7.92821	7.61575	7.77048	7.74151	7.83357	6.64983	6.83333	6.54217	7.118	7.052	6.596	7.16575	6.9203	6.71883	7.199
BBIP1	5.38365	5.56107	5.52611	5.44452	5.4875	5.48891	5.36643	5.49653	5.41988	5.40036	5.46428	5.37849	5.31796	5.44578	5.56389	5.43238	5.43222	5.50817	5.44159	5.49099	5.63024	5.69244	5.54267	5.746	5.55525	5.60896	5.85542	5.6225	5.54517	5.844	5.54
BBOF1	4.17857	4.1704	4.41619	4.2373	4.33903	4.24929	4.27976	4.44357	4.48325	4.31992	4.2699	4.25302	4.50086	4.30151	4.17708	4.19658	4.32016	4.02155	4.25767	4.1354	4.17849	4.255	4.319	4.4515	4.36021	4.291	4.2575	4.363	4.2045	4.2165	4.215
BBOX1	3.98929	4.10024	4.04615	4.05079	3.89754	3.77333	3.76143	3.71619	4.31373	4.01151	4.08213	3.58845	3.9371	4.49532	4.46048	3.75143	3.81214	3.9931	3.815	4.00333	3.81976	4.13792	3.9785	4.61817	3.89367	4.14	3.8125	3.82033	4.0355	4.704	3.915
BBS1	5.04872	4.57893	4.6925	4.4955	4.78111	4.59487	4.49639	4.30929	4.38254	4.52373	4.58849	4.39833	4.33722	4.63611	4.62794	4.65521	4.51758	4.53817	4.65548	4.60275	4.66884	4.61633	4.58614	4.59008	4.53483	4.6065	4.71667	4.65633	4.57744	4.82933	4.51383
BBS10	5.55302	5.65081	5.49829	5.82556	6.04484	5.9431	5.73683	5.72556	5.81413	5.71133	5.92958	5.51738	5.72768	6.04611	5.90954	5.70027	5.78232	5.73032	5.5254	5.98847	5.87453	5.84942	5.21168	5.614	5.4255	5.0365	5.55042	5.635	5.2226	5.44425	5.36542
BBS12	5.45286	5.3473	5.33984	5.35325	5.60651	5.62708	5.24402	5.26743	5.43757	5.37583	5.59405	5.47165	5.31325	5.34476	5.4031	5.39143	5.41442	5.45905	5.62544	5.59692	5.23873	4.8975	5.3015	5.38313	5.32644	4.70483	5.576	5.40717	5.143	5.19567	5.0755
BBS2	6.82079	7.08151	7.35619	7.22992	7.09837	7.09905	7.0619	7.05214	7.03155	7.24048	7.08123	7.00317	7.28944	7.19587	7.1581	6.99452	7.0253	7.04016	7.24349	7.15256	7.125	7.359	6.854	6.975	6.815	7.284	6.98467	6.92217	6.8695	7.369	7.227
BBS5	7.61393	7.48317	7.5625	7.36214	7.43127	7.33274	7.41214	7.5246	7.37579	7.36635	7.40119	7.46635	7.50937	7.48873	7.44476	7.5304	7.41095	7.4025	7.30802	7.36841	7.32194	7.879	7.3585	7.3935	7.31165	7.42617	7.2285	7.32167	7.24125	7.18383	7.406
BBS7	4.29	4.33659	4.45528	4.55558	4.38825	4.50162	4.29	4.55978	4.46532	4.43295	4.22825	4.39302	4.43413	4.42706	4.21881	4.49175	4.32016	4.23377	4.25767	4.31111	4.17849	4.50967	4.33	4.82317	4.41979	4.5665	4.87258	4.592	4.32092	5.05033	4.35733
BBS9	5.42284	5.335	5.50359	5.6699	5.3168	5.56698	5.62135	5.51937	5.47016	5.53589	5.41238	5.69778	5.59794	5.6373	5.65657	5.56937	5.70027	5.43575	5.53006	5.36389	5.48023	5.97513	5.3935	5.322	5.57275	5.69131	5.461	5.50117	5.59392	6.17742	5.69038
BBX	7.24881	7.16929	7.30595	7.36214	7.23143	7.36524	7.17151	7.16972	7.33762	7.25155	7.32456	6.95127	7.22115	7.26143	7.40659	7.01018	7.15274	7.19028	7.25635	7.32389	7.1994	7.6635	7.522	7.61842	7.5835	7.6935	7.421	7.54642	7.507	8.03025	7.349
BCAM	4.09696	3.95143	3.95159	4.14748	4.19603	4.14119	4.25071	4.09869	4.26659	4.3594	4.19861	4.00397	4.20696	4.16	4.26909	4.17665	4.02167	4.25208	4.15788	4.0619	4.17849	4.6634	4.533	4.55517	4.4315	5.13283	4.46175	4.39	4.631	4.76792	4.70233
BCAP31	8.96268	8.67758	8.59873	8.33325	8.73897	8.62183	8.71944	8.60747	8.81563	8.53119	8.71391	8.9277	8.6177	8.5969	8.51698	8.96897	8.65913	8.56413	8.41365	8.60143	8.46706	7.40917	8.23383	7.4625	8.09667	7.81467	7.96364	8.18533	8.17417	7.70767	8.2795
BCAR1	5.71381	5.82421	6.20782	6.03308	5.88032	5.97167	5.88369	5.86994	6.03817	5.80245	5.91683	5.64716	5.95179	6.09483	6.18889	5.93119	5.85222	5.97794	5.84984	5.98357	5.76438	5.93867	6.06992	6.38083	6.12058	6.791	6.12233	6.10083	6.12767	6.11617	6.14367
BCAR3	6.18897	6.04198	5.94817	6.21881	6.07476	6.01162	5.99778	6.01907	6.16754	5.97373	6.15167	5.9073	5.95492	6.25762	6.07425	5.99726	5.9054	6.01105	6.0469	6.18675	6.03929	5.88233	5.7665	6.1045	5.85283	5.87217	6.167	5.98758	5.64692	6.33925	5.64967
BCAR4	4.12833	4.00095	4.15079	4.04127	4.4261	4.11508	4.45506	4.13931	4.20881	4.11237	4.37871	4.25302	4.22762	4.29	4.09905	4.24815	4.16968	4.22574	4.24698	4.12525	4.04867	3.931	3.95	4.0655	4.106	3.895	3.8325	3.85029	4.0655	3.97025	4.09054
BCAS1	3.5769	3.87865	3.90952	3.88881	3.87286	3.79197	3.74296	3.79052	3.97419	3.77643	3.67984	3.76032	3.79365	3.84279	4.01844	3.92065	3.98524	3.83679	3.82714	3.80623	3.93097	4.0065	4.35417	4.129	4.4055	3.96829	4.10383	4.27417	4.3415	4.0355	3.931
BCAS2	7.10837	6.86675	7.02363	6.92766	7.14849	7.07778	7.13333	6.93678	7.07631	7.1331	7.07	6.89395	6.88008	7.09905	6.94968	7.1823	7.19028	6.88831	7.11508	7.10627	6.94766	7.496	6.7615	7.36658	7.0845	7.052	7.155	7.06417	6.89633	7.51375	6.994
BCAS3	4.82613	4.57032	4.87619	4.88921	4.83329	5.01937	4.87824	4.74087	4.77239	4.80418	4.87703	4.97582	4.81659	4.9031	4.83579	4.88921	4.90079	4.64427	4.90669	4.83597	4.83341	4.941	5.05883	5.33133	4.99383	5.25078	5.307	5.0775	5.1325	5.14675	4.89983
BCAS4	4.97986	4.78813	4.65119	4.58802	4.52832	4.58683	4.56631	4.59214	4.77869	4.41776	4.58849	4.56919	4.71022	4.45528	4.49143	4.47738	4.37083	4.55071	4.70583	4.63929	4.56611	4.91992	4.54962	4.8275	4.90058	4.98137	4.891	4.72925	4.52167	4.5985	4.502
BCAT1	7.18698	7.07062	7.16524	7.0029	7.16905	7.38968	7.10698	7.40004	7.21056	7.40742	7.13725	7.41817	7.23996	7.41798	7.24881	7.56619	7.44667	7.05452	7.38524	7.25171	7.06667	5.61933	6.7005	5.49967	6.22367	5.3935	5.6655	6.21175	6.6092	5.18813	7.067
BCAT2	6.84119	6.51016	6.22992	6.15012	6.36	6.31202	6.28567	6.39937	6.34889	6.35369	6.40857	6.5275	6.63627	6.36238	6.28143	6.47055	6.46126	6.60952	6.46119	6.37478	6.47159	6.3595	6.164	6.27121	6.41936	6.19775	6.46808	6.4425	6.2425	6.62067	6.138
BCCIP	4.86733	4.79151	4.96379	5.02517	4.89004	4.90286	5.09175	4.87194	4.87099	4.79598	4.90333	4.75079	4.97202	5.05815	4.95637	4.89048	4.87119	4.89333	4.98238	4.94981	4.87838	5.37425	5.029	5.247	5.02542	5.0235	4.96575	5.0365	5.00867	5.599	4.85725
BCDIN3D	5.8084	6.1219	5.67302	6.04333	6.04484	5.88476	5.91548	5.93464	6.04433	5.96449	5.8973	5.84984	6.12476	5.81413	5.81835	5.89816	5.88175	6.02167	5.78881	5.92476	6.06934	5.676	5.26875	5.9288	5.64417	5.0595	5.764	5.587	5.1195	5.427	5.40467
BCDIN3D-AS1	4.18917	3.97286	4.17127	4.08905	3.96833	4.02	4.0381	4.01681	3.84283	3.99214	3.95988	3.96024	3.91585	4.1129	3.9931	3.98563	4.01238	3.93929	3.99252	3.87262	3.86976	4.0455	3.90387	3.931	3.76475	3.81067	3.932	4.14658	3.8645	4.0495	3.826
BCHE	4.02667	3.93087	4.29071	4.36281	3.9954	4.13265	4.74512	4.11944	4.03548	4.12111	4.00262	4.06873	3.79016	4.2644	4.04944	3.84849	4.09976	4.27091	3.98113	4.08968	4.01143	5.289	4.64979	5.1385	4.8945	5.625	5.272	5.06963	4.451	5.8345	4.8285
BCKDHA	5.91042	5.56698	5.48552	5.60675	5.56629	5.43357	5.54536	5.60778	5.47984	5.55087	5.51032	5.84033	5.49921	5.45155	5.43551	5.67004	5.63403	5.56089	5.42937	5.50428	5.51746	5.32	5.51608	5.3335	5.38837	5.39733	5.365	5.33067	5.47483	5.41433	5.42263
BCKDHB	5.89587	5.88736	6.09504	6.19905	5.96204	6.10016	6.16702	6.0077	6.10492	6.18206	6.14071	6.01994	6.06715	6.18085	6.21107	6.02665	6.09627	5.93464	6.17675	6.05989	6.09788	6.94467	6.3405	6.68	6.459	6.74042	6.5505	6.58575	6.30683	6.92967	6.18975
BCKDK	7.5304	7.01385	6.86429	6.75213	6.9731	6.89262	6.93833	6.98702	7.01101	7.02405	7.09095	7.20329	6.93	6.75202	6.92131	7.16365	7.03333	6.94667	7.13024	7.01925	6.9731	6.078	6.85925	6.60283	6.4805	6.4765	6.607	6.4855	6.88679	6.2855	6.85708
BCL10	3.83857	3.90976	3.79262	3.58643	3.84835	3.78443	3.83849	3.80273	3.88286	3.89833	3.85	3.69254	3.84611	4.13119	3.79756	3.71952	3.86913	3.87206	3.83857	3.965	3.73587	3.771	3.7625	3.6995	3.7085	3.7785	3.932	3.972	3.8745	4.069	3.671
BCL11A	4.94952	4.59003	4.60984	4.49325	4.4227	4.45205	4.38345	4.30381	4.74381	4.55171	4.58694	4.71077	4.83155	4.65964	4.58206	4.67246	4.46829	4.55631	4.14131	4.48075	4.73004	4.20025	4.54525	4.06015	4.115	4.047	3.917	4.05058	4.5095	3.9415	4.1305
BCL11B	4.72262	4.48583	4.77938	4.66393	4.9606	4.70032	4.88147	5.01467	4.6952	5.01976	4.85057	4.87231	4.79113	4.51758	4.76425	4.78427	4.76691	4.44544	4.43464	4.96698	5.19151	4.18117	4.849	3.854	4.524	4.3195	3.8465	4.46473	4.7135	4.1565	4.5735
BCL2	5.96857	5.76472	6.28464	6.40619	6.07	6.18905	6.17206	6.14506	6.00089	6.0677	6.2463	5.97857	6.07476	6.20782	6.19798	5.96171	5.95205	5.725	6.44346	6.09087	6.08444	5.93767	5.93642	6.27121	6.04975	6.02383	6.19717	6.1155	5.95752	6.33175	6.205
BCL2A1	7.93881	7.7081	7.76143	7.29988	7.64754	7.4869	7.77512	7.49786	7.83492	7.71972	7.8569	8.21252	7.3606	7.29944	7.32964	8.11238	7.56335	7.63087	7.45063	7.46381	7.62976	5.63779	7.00525	5.55375	6.6135	5.51464	5.50933	6.632	6.95325	5.75632	6.994
BCL2L1	5.83532	5.13371	5.70811	5.34423	5.75409	5.88476	5.77778	5.51937	5.68647	5.61716	6.03694	6.01048	5.47187	5.62771	5.70735	6.03698	5.70027	5.13468	5.91002	5.85841	5.53349	5.0225	5.451	5.793	5.48058	5.42883	5.72443	5.6955	5.46967	5.17925	5.40467
BCL2L10	3.9081	3.70286	3.69476	3.94063	4.07146	4.52202	3.99427	3.77905	4.07781	4.01151	3.98036	4.15981	3.8073	3.68714	4.12881	3.94143	4.06873	4.02155	3.6696	3.74833	3.78246	4.002	3.9585	3.907	3.982	3.8515	3.728	3.961	4.0455	3.69038	4.04158
BCL2L11	6.10948	6.14921	5.97706	6.24968	5.96706	5.82024	5.94443	5.98806	5.89095	6.18206	5.87587	6.11196	6.07165	5.94163	5.95895	5.77583	6.05901	6.185	5.78881	5.94052	6.35056	5.29427	6.33083	5.02733	5.68592	5.7865	5.33408	5.512	6.27858	5.43333	6.07133
BCL2L12	6.74198	6.81738	6.56802	6.77095	6.79907	6.73	6.85333	6.90881	6.63638	6.7852	6.82143	7.04698	6.79861	6.63246	6.62726	7.00107	6.86587	6.72262	6.81706	6.80103	6.85571	6.28733	6.47197	6.36742	6.5265	6.31275	6.49975	6.53188	6.4985	6.136	6.69225
BCL2L13	5.27365	5.31222	5.42357	5.55155	5.39282	5.45405	5.49762	5.66419	5.53475	5.55583	5.35206	5.61597	5.59345	5.42559	5.38082	5.57432	5.55587	5.39282	5.41726	5.36984	5.45099	5.38742	5.557	5.3922	5.30133	5.364	5.244	5.33567	5.57917	5.19183	5.43717
BCL2L14	3.7303	3.97286	3.81405	3.88881	3.67254	3.7569	3.86571	3.72524	3.86394	3.86529	3.67224	3.69254	3.66075	3.71841	3.83024	3.75143	3.88905	3.82984	3.72181	3.92857	3.82702	3.8385	3.875	3.7205	3.74467	3.78917	3.86177	3.6595	3.602	3.6995	4.06367
BCL2L15	4.27657	4.0825	4.06083	4.1196	3.93123	4.09062	3.99427	4.0425	4.14897	4.16802	4.18091	4.27198	3.97536	4.01238	4.08889	4.12052	4.04933	4.1754	4.26753	4.16302	4.51187	4.32758	4.13873	4.19458	4.148	4.043	4.1275	4.1275	4.1195	4.07517	4.09054
BCL3	8.53907	9.4881	8.88829	8.96667	8.7796	8.66929	8.74393	8.91012	8.71944	9.21476	8.96095	8.89512	8.9131	8.91952	8.78825	8.80377	8.94944	9.36627	8.62234	8.68675	9.06024	7.6325	9.03933	8.0865	8.31375	9.55583	8.14	8.46	9.0675	9.251	9.43725
BCL6	7.82016	7.91881	7.83575	7.77984	7.67976	7.72905	7.60643	7.66754	7.5546	7.83563	7.76286	7.49238	7.3606	7.86274	7.78643	7.59709	7.55968	7.83071	7.8127	7.60643	7.74603	7.23642	8.0225	7.09538	7.525	8.132	7.93608	7.71483	8.129	8.083	7.898
BCL6B	4.93295	6.76183	5.88421	6.33119	5.92093	5.85337	5.77778	5.99627	6.13532	5.7575	5.57359	5.07254	5.70925	5.77631	6.11383	5.53929	6.01317	6.66375	5.29444	5.46484	5.7973	5.22242	5.557	4.66546	5.0015	5.418	5.28	5.00333	5.5305	5.93	6.73958
BCL7A	5.18167	5.05925	4.92008	4.70893	4.99579	4.53119	4.76349	4.62794	4.94971	4.41222	4.84014	4.45583	4.90333	4.71371	4.72857	4.37087	4.51758	4.9594	5.06607	4.92111	4.81063	5.484	5.28	5.64608	4.8325	5.685	5.32958	4.928	5.38517	6.30958	5.08617
BCL7B	6.78476	6.45276	6.46937	6.43246	6.52597	6.31202	6.34841	6.44037	6.4419	6.33384	6.45821	6.54788	6.38663	6.31905	6.42929	6.46041	6.25413	6.6226	6.48167	6.44138	6.15067	6.116	6.1955	6.83975	6.29442	6.423	6.698	6.381	6.09233	6.33925	5.843
BCL7C	5.00844	5.13371	5.05317	5.19151	5.27381	5.26192	5.10571	5.17893	5.2781	5.16988	5.29738	5.18056	5.05317	5.15893	5.28681	5.19522	5.16671	5.1019	5.31857	5.20583	5.12754	5.627	5.187	5.53779	5.2345	5.5275	5.50933	5.204	5.33592	5.28	5.1585
BCL9	4.48353	4.6625	4.52567	4.83067	4.58512	4.36206	4.85052	4.83762	4.80119	4.43295	4.84014	4.69027	5.06041	4.65627	4.71214	4.48317	4.54909	4.87282	4.54285	4.46627	4.5506	5.58742	5.0025	5.21075	5.0015	5.5235	5.2465	4.90392	5.111	5.46167	5.05375
BCL9L	5.36277	5.70694	5.95426	5.98073	5.74888	5.84885	5.78857	5.61437	5.922	5.7575	5.72417	5.57563	5.97222	6.15079	5.81835	5.56373	5.80717	5.76472	5.78563	5.71746	5.9681	5.765	5.879	6.30042	5.7635	6.47	5.71142	5.88583	5.95083	6.36388	5.6855
BCLAF1	7.72	8.07143	8.30627	8.32171	8.02286	8.14087	8.07095	8.20129	8.17082	8.18071	7.97095	7.89262	8.2311	8.16202	8.27452	7.89048	8.09119	8.1704	8.0831	7.9602	8.24016	8.6385	8.17925	8.326	8.2565	8.36625	8.21692	8.23975	8.1405	8.24108	8.2205
BCLAF3	4.87555	4.76476	4.98653	4.99942	4.98028	4.92405	4.99183	4.75433	4.99155	4.89583	4.97244	4.90764	5.0337	4.99964	4.91907	4.91044	4.93673	4.82893	4.8945	4.77651	4.61675	5.38986	4.95771	5.29179	4.95175	5.1445	5.02008	5.0255	5.00867	5.3845	4.92192
BCO1	3.74754	3.88925	3.72349	3.85603	3.89754	3.71413	3.74296	3.84792	3.61262	3.59381	3.69476	3.8773	3.77286	3.72893	3.81924	3.99492	3.67952	4.05935	3.97266	3.77175	4.23455	3.6045	3.754	3.64958	3.72	3.7575	3.892	3.6705	3.79567	3.865	3.85533
BCOR	4.78216	5.05597	4.93294	4.96714	5.00844	4.9819	5.05235	4.99337	5.07097	4.84681	5.00452	4.78881	5.02157	5.04238	4.7169	4.90079	4.95487	4.95187	4.86968	4.94981	5.00151	4.864	5.03117	5.03792	4.70323	5.59867	4.7925	4.5375	4.97908	5.38542	4.84412
BCORL1	6.22881	6.26778	6.01333	5.71618	5.98239	5.91022	5.89071	5.76687	6.00492	5.6398	5.96778	5.95991	6.0484	6.02444	6.012	5.65063	5.72743	6.30282	5.88081	5.93488	5.92768	6.15433	6.245	6.222	5.96762	6.4836	6.2021	5.9968	6.201	6.14075	5.93767
BCORP1	4.25795	4.52222	4.50373	4.58113	4.34996	4.37228	4.35911	4.62325	4.40238	4.50922	4.37871	4.71077	4.45601	4.22754	4.50643	4.65317	4.41524	4.59905	4.6127	4.49286	4.51187	4.337	4.58614	4.4515	4.6665	4.505	4.685	4.54133	4.58408	4.36275	4.37012
BCR	5.76023	6.40571	6.23852	6.26992	6.02452	6.25016	6.25294	6.21016	6.25584	6.02482	6.13702	5.96449	6.42659	6.23098	6.40111	5.7769	6.12143	6.3197	6.36563	5.8877	6.18825	6.19335	6.585	6.7285	6.348	6.90017	6.63533	6.37042	6.58642	6.08783	6.718
BCRP2	4.3967	4.51619	4.62298	4.72647	4.34996	4.63635	4.61048	4.60286	4.72869	4.5197	4.66702	4.56919	4.59374	4.6954	4.65804	4.64202	4.56853	4.5119	4.70392	4.64494	4.4269	4.42093	4.941	4.94475	4.70875	5.06775	4.82921	4.628	4.88858	4.48	4.7287
BCYRN1	11.4205	11.6938	11.6719	11.6719	11.611	11.6505	11.4624	11.7506	11.6298	11.7131	11.5488	11.5057	11.6892	11.7131	11.7131	11.4695	11.6233	11.6938	11.6433	11.7131	11.7131	11.8483	11.6111	11.5235	11.5985	11.6237	11.333	11.5875	11.559	11.5678	11.6825
BDH1	5.5169	5.49841	5.30246	5.30079	5.09341	5.31897	5.5281	5.12697	5.22052	5.20237	5.49373	5.84984	4.92496	5.41442	5.07185	5.44581	5.01683	5.53522	4.85986	4.79484	5.04024	4.6315	4.8175	4.66546	5.40281	4.666	4.78783	5.5335	4.58933	4.54667	4.8285
BDKRB1	4.33976	5.13371	4.22006	4.09952	4.1221	4.50162	3.85548	4.17754	3.96381	4.31992	3.7919	4.19024	4.15919	4.27226	4.16742	4.12052	4.21913	5.07137	4.1475	3.99357	4.24675	4.1945	5.16358	5.18317	4.0655	5.324	4.776	4.29628	5.204	5.6035	4.78933
BDKRB2	5.74714	6.83246	5.5501	5.82556	5.19108	5.75776	5.55583	5.49905	5.16325	5.68079	5.34744	5.8306	5.43417	6.00167	6.07425	5.51988	5.64032	6.71641	5.41238	5.29721	6.39393	5.9595	6.60675	6.43758	6.04483	7.4635	6.39349	6.0505	6.5543	7.43725	6.607
BDNF	4.42472	3.99381	4.53179	3.88881	4.22143	4.18796	4.19556	4.11381	4.3781	4.11237	3.93891	3.9877	3.98004	4.13683	3.96877	3.75861	4.04087	3.86119	4.06393	4.09524	4.1201	4.312	4.48233	5.18813	4.6975	4.617	5.375	4.81267	4.47575	4.50975	4.311
BDNF-AS	4.83159	4.58468	4.92008	4.42524	4.675	4.73179	4.57786	4.60762	4.72869	4.59498	4.57571	4.75452	4.72714	5.10609	4.59421	4.54937	4.85762	4.63607	4.62762	4.60762	4.45306	5.38417	4.849	5.00067	4.9055	4.89483	4.83962	4.85767	4.9155	4.65613	4.684
BDP1	4.82246	5.13371	5.25079	5.39302	5.41175	5.44806	5.1323	5.23277	5.01697	5.15468	5.28651	5.02333	5.11985	5.38742	5.24181	5.27644	5.32058	5.09194	5.10347	5.24667	5.04024	5.58742	5.17467	5.85542	5.3935	5.2015	5.586	5.47808	5.061	5.7335	5.34733
BEAN1	4.61913	4.15167	4.13119	4.17791	4.48063	4.55302	4.60306	4.46873	4.47952	4.11237	4.56468	4.87231	4.41414	4.41318	4.31929	4.87774	4.43619	4.29698	4.48455	4.5506	4.43448	4.5355	4.3405	4.35333	4.30342	4.26833	4.23633	4.14658	4.63573	4.1535	4.308
BECN1	7.4025	7.5906	7.72008	7.76595	7.76258	7.80423	7.64571	7.87341	7.7394	7.86633	7.70929	7.75512	7.81857	7.71746	7.84143	7.74167	7.63778	7.45262	7.70381	7.75048	7.70262	7.41625	7.71717	7.84917	7.6795	7.50417	7.82	7.7385	7.516	7.90425	7.695
BEGAIN	5.25079	5.51944	5.17151	4.82246	4.28679	5.02333	5.11206	4.7503	4.98786	5.34468	5.14151	4.94079	4.75676	4.50624	5.0819	5.2956	5.09233	5.43153	4.63683	5.08333	4.97884	5.58742	5.46067	4.79329	5.46233	5.576	4.755	5.4175	5.289	5.078	4.9883
BEND2	3.98381	3.89381	3.9623	4.02452	3.95024	3.94587	3.93588	3.97105	3.99036	3.9019	3.99214	4.09175	3.92238	3.90614	3.84714	4.0027	3.99458	3.9969	3.94762	3.9619	3.77381	3.989	3.9275	3.9795	4.0335	4.05633	4.0165	3.904	3.96767	3.8405	3.938
BEND3	4.63262	4.99476	4.84228	4.83627	4.79808	4.71452	4.70603	4.64708	4.68956	4.81847	4.63754	4.78274	4.60704	4.67167	4.72111	4.87231	4.57348	4.80458	4.74294	4.56286	4.93944	4.88033	4.64117	5.06475	4.704	4.6905	4.82921	4.7245	4.675	4.65108	4.7615
BEND3P1	4.09696	4.0825	3.85548	3.82381	4.05399	3.87833	3.89714	3.87817	3.89119	3.87535	3.90881	3.843	3.9854	4.06738	4.17708	4.11071	4.11048	3.93929	3.94095	4.10929	3.83333	3.99283	3.854	3.941	4.02267	3.98717	4.15508	4.04633	3.8265	3.9795	4.11133
BEND4	3.87286	3.9769	3.74806	3.77369	3.79087	3.83857	3.80198	3.69048	3.8573	3.90274	3.7381	3.97171	3.93119	3.67024	3.84135	3.59643	3.71214	3.90598	3.78032	3.775	3.74595	3.719	3.9725	3.8195	3.72658	3.738	3.7395	3.77483	3.84567	3.7675	3.8835
BEND5	4.87131	5.15268	5.36389	5.71618	5.7456	5.2894	5.45595	5.04024	5.7769	4.95161	5.54353	4.73274	5.42625	5.59794	5.7556	4.77913	5.39848	5.13468	5.56302	5.80565	5.15432	6.991	6.3595	7.00858	6.0065	6.804	6.2021	5.9968	6.331	7.248	6.1735
BEND6	4.22762	4.69909	4.34071	4.46149	4.2069	4.57462	4.24595	4.70786	4.36281	5.24514	4.27567	4.56438	4.55242	4.38087	4.50071	4.45385	4.72468	4.62127	4.37659	4.38388	4.19381	4.3085	4.37342	4.30892	4.158	4.1255	4.226	4.34117	4.22008	4.2145	4.498
BEND7	4.19901	4.44692	4.54745	4.58048	4.62135	4.26988	4.47694	4.36492	4.66806	4.44357	4.46623	3.94881	4.40385	4.45833	4.59794	3.92706	4.18448	4.52008	4.54905	4.18788	4.32266	4.88917	5.11517	5.49488	4.9055	5.58067	5.04908	4.82908	5.1675	5.39417	4.8253
BEST1	5.75667	5.4223	5.19052	4.9879	5.14975	5.1229	5.09175	4.97913	4.91833	5.29337	5.06226	5.43333	4.96734	5.17107	4.91298	5.33333	5.1131	5.35831	5.14265	5.08333	5.04845	5.299	4.79	4.513	4.78433	4.28	4.5475	4.797	4.77575	4.24558	4.65775
BEST2	4.29905	4.90516	4.41619	5.21827	4.28679	4.49254	4.66627	4.59627	4.47494	4.64869	4.37871	4.69027	4.86647	4.34098	4.86913	4.68607	4.38913	4.91643	4.65548	4.48472	4.91238	4.4625	4.60346	4.7055	5.09383	4.685	5.44433	4.928	4.33067	4.11883	4.60963
BEST3	4.31317	4.58008	3.92635	4.9308	4.43817	4.18365	4.47008	4.75975	4.48643	4.56937	4.46115	4.36205	4.53397	4.38796	4.65056	4.43152	4.44397	4.86405	4.72558	4.39562	4.61905	4.60608	4.461	4.43717	5.0135	4.54133	4.94917	4.37756	4.49408	4.08283	4.62408
BET1	5.14336	4.89095	4.96762	4.91491	5.12754	4.93984	4.9247	4.95008	5.0369	4.99829	5.00325	4.95456	5.07032	5.08167	4.81012	5.06383	4.94955	4.98987	5.03681	5.01635	5.00798	5.00617	4.88345	4.97717	4.9745	4.72533	4.431	4.9715	4.9297	5.01633	4.85463
BET1L	5.68869	5.37369	5.40413	5.46738	5.37873	5.37437	5.43086	5.49653	5.40326	5.35252	5.48353	5.53052	5.41806	5.36731	5.48079	5.49627	5.48238	5.46625	5.58495	5.47119	5.39719	5.54025	5.52041	5.66633	5.4255	5.576	5.464	5.424	5.48667	5.427	5.40467
BEX1	4.15817	4.89776	4.38825	4.46563	5.09341	5.39909	4.20508	5.10667	4.47494	4.68873	4.48837	4.17177	4.26667	4.28079	4.19794	4.45385	4.29905	4.92746	4.59396	4.73079	4.07905	4.56629	5.42792	5.41713	4.0655	5.155	4.3	4.3425	5.165	5.156	4.32796
BEX2	5.62802	5.41238	5.74762	5.58937	5.7456	5.50865	6.25768	5.30736	5.83984	5.14437	6.45821	5.64345	5.39848	5.42559	5.96579	5.40262	5.21238	5.39683	5.36762	6.2463	5.7669	7.32567	6.2355	6.98633	6.4915	7.544	6.69	6.4425	6.201	7.145	5.48775
BEX3	8.96268	9.08863	9.25619	9.47286	9.34599	9.28401	9.50937	9.27762	9.60175	9.26409	9.4579	9.12429	9.22137	9.49786	9.49786	9.08954	9.34119	9.07024	9.14387	9.41321	9.08667	10.0965	9.43967	9.7835	9.7105	9.739	9.7265	9.66367	9.30386	10.068	9.302
BEX4	6.65452	5.93067	6.3933	6.5089	6.41893	5.96405	6.38167	6.24659	6.07421	6.29722	6.22643	6.31905	6.09517	6.06516	6.34056	6.43413	6.21313	6.12183	6.36563	6.01619	6.11734	6.69925	6.391	6.4478	6.24353	6.71233	6.46808	6.45608	6.13211	7.1175	6.1275
BEX5	4.69058	5.21712	5.22135	5.43226	4.9331	5.09022	5.24402	5.35992	5.66802	4.46028	5.34744	4.24167	5.37186	4.5225	5.78849	4.29881	5.09233	5.16607	5.0119	4.92111	4.52881	6.804	5.9505	6.975	5.64417	6.50217	6.12742	5.615	5.89987	7.024	5.54
BFAR	6.43774	6.5341	6.32653	6.67643	6.79476	6.81033	6.51917	6.62881	6.76353	6.57522	6.77857	6.81262	6.7325	6.77714	6.70529	6.61528	6.70381	6.60952	6.74016	6.68246	6.59933	6.56667	6.6265	6.67083	6.41936	6.541	6.49975	6.463	6.64596	6.662	6.661
BFSP1	5.01395	5.2419	5.35143	5.3753	4.97719	5.92195	5.21173	4.96818	5.51845	5.06062	5.12099	4.6683	5.56992	5.52758	5.11976	4.78981	5.4973	5.23873	5.3799	5.51877	5.17361	6.31067	5.1195	5.6855	5.57275	5.78321	5.8895	5.587	5.1195	6.2408	5.45233
BFSP2	3.84863	3.76325	3.80397	3.81405	3.82881	3.69435	4.01802	3.88931	3.74613	3.98063	3.86913	3.77889	4.08849	3.96317	4.03349	4.02929	4.06873	3.82984	3.6696	4.07079	3.9231	3.847	3.89375	3.962	3.794	3.70567	3.771	3.82033	3.9745	3.649	3.9645
BFSP2-AS1	4.72857	4.80413	4.79865	4.59385	4.35881	4.50162	4.37881	4.53151	4.48325	4.45205	4.7503	4.53806	4.22762	4.48486	4.5119	4.53179	4.4002	4.3881	4.32786	4.57702	4.5506	4.3915	4.533	4.55517	4.47125	4.5965	4.38225	4.42117	4.547	4.369	4.25475
BGLAP	6.41163	6.77202	5.76706	5.70405	5.30611	5.75776	5.4121	5.77702	5.33137	5.55964	5.81016	5.62587	5.61881	5.50778	5.51909	5.6181	5.72743	6.80669	6.02495	5.65643	5.70865	5.40917	5.32417	5.354	5.49033	5.88367	5.30096	5.43333	5.42837	5.86283	5.429
BGN	7.12127	7.29476	7.89857	8.03571	7.79738	8.26386	7.87976	7.67806	8.32651	7.63429	8.07786	7.25413	7.52302	8.14329	8.0177	7.4194	8.0831	7.26952	8.06913	7.78181	7.74603	7.924	8.1435	8.22317	8.20717	8.3805	8.522	8.2225	8.14425	7.606	8.27492
BHLHA15	4.04718	4.19958	4.02271	4.33119	4.11393	3.83857	3.83849	4.29905	3.90254	4.24929	4.08213	4.24167	4.21712	3.77115	4.15868	4.16611	4.14002	4.1754	4.20869	3.99357	4.00198	4.184	4.029	4.268	4.38083	3.941	4.43417	4.14658	4.13658	3.95883	4.121
BHLHA9	4.0765	4.05504	4.11071	4.1381	4.1322	4.11968	4.06056	4.04738	3.96381	4.02667	3.90881	4.17722	4.12881	3.97881	4.1445	4.10018	4.14002	4.24651	4.10597	4.14071	4.06512	4.00662	3.984	4.1145	4.1185	4.01092	4.29433	3.99117	4.05817	4.13323	4.13713
BHLHB9	4.61913	4.62908	4.41619	4.69913	4.58512	4.64024	4.44575	4.30929	4.40238	4.33	4.57571	4.53806	4.56698	4.50624	4.37841	4.51183	4.57855	4.47563	4.56218	4.55599	4.22238	5.0225	4.5045	4.78383	4.48017	4.5965	4.6936	4.633	4.3415	5.236	4.461
BHLHE22	4.30917	5.46063	5.04863	5.63261	4.22754	4.55774	4.10833	5.03021	3.85326	4.95161	4.37871	4.64032	5.00832	4.60433	4.90321	4.64869	4.9585	5.30675	4.20869	4.79484	4.56103	4.6634	4.13873	4.29	4.26	4.5015	4.31042	4.48983	3.8645	4.61983	4.77113
BHLHE23	7.48643	7.3619	7.77123	6.96533	7.69167	6.95266	7.28012	7.4773	7.32655	7.47591	7.81044	7.33397	7.45913	6.90893	7.29643	7.36802	7.33079	7.58683	7.78849	7.23071	7.18698	7.21025	7.7015	7.26	8.0555	7.294	7.325	7.46	7.28133	7.383	7.383
BHLHE40	7.83944	7.47571	6.90452	7.17675	6.67661	7.1956	7.0031	7.05889	6.94897	6.99306	7.1619	7.06351	6.66529	6.82548	6.69321	7.22992	7.29895	7.55294	7.08	6.67032	6.93833	6.34	7.4625	6.87033	6.962	7.80883	6.8855	6.847	7.416	7.78	7.4325
BHLHE41	7.86974	7.29476	7.47532	7.33079	7.4948	7.79476	7.75258	7.46738	7.39143	7.54881	7.91437	8.06151	7.26095	7.30381	7.41817	8.13048	7.69286	7.36048	7.60349	7.8481	7.29853	6.3595	7.0115	6.3188	6.904	7.74696	6.46808	6.815	6.90833	7.629	7.2515
BHMG1	3.75405	3.68365	3.7284	3.85	3.62024	3.63619	3.80452	3.7203	3.66194	3.75202	3.7046	3.62357	3.85476	3.68714	3.65262	3.81095	3.8031	3.8219	3.86833	3.80206	3.84857	3.747	3.6795	3.65525	3.8675	3.78917	3.74317	3.516	3.7725	3.81	3.771
BHMT2	4.74929	5.53349	4.89129	5.6699	5.07226	5.01429	5.50938	5.29786	5.7769	5.14437	5.36762	4.73274	5.45323	5.39567	5.24181	4.44214	5.28976	5.34734	5.27188	5.20583	4.96833	6.00408	5.49704	6.076	5.40281	6.08533	6.09942	5.49667	5.5209	6.265	5.34733
BICC1	4.58099	5.28907	4.51516	4.86508	4.53844	4.56833	4.80558	4.99452	4.27976	4.64286	4.19024	4.47429	4.85462	4.62103	4.89909	4.44214	4.32615	5.31135	4.92575	4.22762	4.86636	5.029	4.50121	5.61933	5.4285	4.5905	5.3935	5.27533	4.55887	4.7085	5.57688
BICD1	4.20952	4.35262	4.56575	4.45579	4.43317	4.58147	4.44575	4.61738	4.52762	4.50922	4.42706	4.19024	4.56698	4.5225	4.52179	4.50075	4.37083	4.47563	4.36512	4.50357	4.4269	4.33067	4.27183	4.54454	4.51067	4.31055	4.41367	4.633	4.1465	4.4725	4.5735
BICD2	7.35532	7.32409	7.52524	7.47532	7.57238	7.55671	7.34258	7.40262	7.38095	7.45762	7.41345	7.25413	7.40429	7.4781	7.48595	7.45488	7.36952	7.32579	7.50758	7.5621	7.20476	7.135	7.249	7.375	7.284	7.3955	7.33192	7.306	7.25242	7.2685	7.2515
BICDL1	3.94929	3.8056	3.88802	3.74	3.79548	3.7379	3.92556	3.91048	3.70929	3.83357	3.68667	3.8327	3.7631	3.9434	3.79756	3.72992	3.68841	3.7014	3.64784	3.76101	4.04867	3.9135	3.90387	3.87683	3.617	3.8	3.72	3.761	3.84567	3.761	3.81695
BICDL2	4.58099	4.77824	4.35087	4.48782	4.76234	4.5396	4.65548	4.56833	4.48325	4.72155	4.7131	4.55917	4.65873	4.5225	4.565	4.53976	4.56853	4.53817	4.74294	4.39976	4.82504	4.8175	4.71477	4.685	4.452	4.65325	4.7135	4.29628	4.58933	4.38025	4.66917
BICRA	5.03869	4.95718	5.01786	4.9737	4.75777	4.82461	4.86762	4.78462	4.90181	4.79109	4.77427	4.90764	4.8827	4.77088	4.91804	4.99543	4.90333	5.16607	4.90079	4.79484	4.97446	4.8175	4.97981	5.0505	5.04817	5.01887	5.01133	4.965	4.976	4.8835	4.68575
BID	7.8963	7.97587	7.79248	7.80333	7.87262	7.73563	7.68397	8.10762	7.99119	7.95536	7.90532	8.24302	7.86786	7.71167	7.77095	8.17145	7.97952	7.97131	7.72952	7.87516	8.13286	6.1475	7.43592	6.234	7.14433	6.27592	6.3	6.99483	7.4025	6.33925	7.571
BIK	4.05817	4.07577	4.37	4.09952	3.94095	3.83857	3.95611	3.84792	3.96381	4.29881	4.04095	3.755	4.33722	4.01238	4.02238	3.8892	4.04933	4.18659	3.75321	4.1354	4.03047	3.761	4.172	3.7205	3.8325	3.82	3.8325	3.87817	4.1465	3.917	3.6495
BIN1	6.64615	6.40571	6.5089	6.33119	6.19095	6.1106	6.13952	6.44037	6.31044	6.37313	6.34849	6.44581	6.36762	6.00167	6.11383	6.2271	6.40048	6.35849	6.35	6.39567	6.36468	6.06583	6.06992	5.87771	6.49867	6.2355	6.212	6.36108	6.11383	5.6665	5.916
BIN2	6.57698	6.46223	6.035	6.00492	6.15115	6.06724	6.01512	6.3225	6.10492	6.35369	6.26976	6.50806	6.22956	6.10476	5.8084	6.55054	6.46126	6.27213	6.12817	6.27021	6.3275	4.17462	5.3125	4.31192	5.256	4.5879	4.82921	5.43333	5.31	4.22667	5.2231
BIN3	6.5919	6.84889	6.86429	6.53784	6.66579	6.74357	6.6775	6.63917	6.76353	6.68438	6.72262	6.59036	6.67266	6.7572	6.74775	6.69369	6.68082	6.77563	6.75225	6.70381	6.6181	6.502	7.06383	6.9508	6.719	7.155	6.9035	6.815	7.05025	6.73717	6.89629
BIN3-IT1	4.37087	4.71437	4.47548	4.46563	4.50377	4.47694	4.73225	4.63786	4.52762	4.4996	4.49929	4.64905	4.61889	4.49532	4.77869	4.98394	4.54909	4.77476	4.73079	4.38905	4.72569	4.61	4.71477	4.64608	4.53954	5.12327	4.7455	4.6025	4.74563	4.7455	4.59
BIRC2	6.91357	7.02222	7.41327	7.21919	7.18786	7.29476	7.20786	7.44631	7.20329	7.32151	7.08123	7.18111	7.23476	7.40161	7.21056	7.17056	7.27179	7.1754	7.25175	7.18476	7.42476	7.20092	6.9935	6.804	6.88175	6.906	6.922	6.95233	6.98504	7.10583	7.128
BIRC3	7.24032	7.18524	7.10524	6.88879	6.89183	6.7246	6.71504	7.1319	6.82929	6.88389	6.6496	6.5275	7.04529	6.51841	7.02175	6.54201	6.81333	7.13167	6.60306	6.71276	7.44738	6.5477	7.20133	6.30042	5.9535	7.09217	5.56667	5.94	7.18267	6.42462	6.42342
BIRC5	6.5919	6.83246	6.52706	6.475	6.29377	6.20548	6.37087	6.72552	6.60345	6.18206	6.38794	6.54788	6.66529	6.49984	6.35107	6.59879	6.66767	6.77563	6.105	6.27021	6.40389	4.72533	5.10783	4.4205	5.7635	4.65325	6.32475	5.71892	5.111	4.11883	5.99142
BIRC6	5.8084	5.70694	5.80849	5.61111	5.83389	5.61024	5.71735	5.70755	5.76706	5.59849	5.74377	5.6848	5.9452	5.74877	5.60112	5.84845	5.75659	5.83667	5.72956	5.73294	5.63615	5.81714	5.79563	5.9785	5.79317	6.1875	5.8045	5.75067	5.92983	6.01808	5.66717
BIRC8	3.69152	3.6719	3.83438	4.26946	3.73952	3.61905	3.81921	3.75897	3.83369	3.84262	3.56893	3.8327	3.72077	3.58667	3.94206	3.87817	4.02167	3.64881	3.77381	3.72968	3.71111	3.79943	3.89375	3.641	3.89367	3.8515	3.892	3.6595	3.73877	3.77233	3.85533
BIVM	5.6496	5.95205	6.0736	5.95488	5.76607	5.9431	5.85832	5.94524	5.95671	5.89609	5.86611	5.71314	5.81348	6.06516	6.03177	5.85673	5.87305	5.93464	5.9523	6.00746	5.97754	6.163	5.9505	5.85542	5.98767	5.94	5.75417	5.94	5.94	6.19879	6.1165
BLACE	3.66968	3.78381	3.68571	3.76143	3.80444	3.65944	3.65881	3.88931	3.84283	3.56774	3.86913	3.96024	3.91585	3.77115	3.81924	3.86833	3.68841	3.85075	3.72181	3.54071	3.77381	3.80983	3.8645	3.7835	3.8525	3.86163	3.98438	3.729	3.90467	3.6995	3.992
BLCAP	5.24675	5.21317	5.32689	5.30079	5.35282	5.35032	5.4121	5.36411	5.32762	5.31857	5.39813	5.5125	5.30833	5.36325	5.37677	5.51635	5.41143	5.35831	5.4719	5.44756	5.41143	5.216	5.3085	5.54133	5.42775	5.51464	5.634	5.54033	5.36333	5.29933	5.30067
BLID	4.22042	5.08012	5.50833	5.44452	5.38431	5.31897	5.57552	5.41263	5.49675	5.26274	5.10313	4.97918	5.48968	5.55062	5.22135	4.96632	5.35504	4.99917	5.55349	5.36004	5.12754	6.255	6.0935	5.64608	5.86183	6.60608	5.26483	5.73954	5.92983	6.77908	5.75433
BLK	4.11817	4.2304	4.72845	4.07952	4.26667	4.17905	4.27976	4.23421	4.9396	4.29881	4.37871	4.64905	4.78775	4.20686	4.43317	4.23768	4.18865	4.25208	3.94095	4.49286	4.1881	3.64567	4.43283	4.07467	3.74467	3.81067	3.86177	3.82917	4.184	3.907	4.06367
BLM	5.47016	5.32876	5.13794	4.91491	5.10357	5.04413	4.99183	5.12697	5.09164	5.10107	5.24806	5.17175	5.07032	5.1374	5.02644	5.09079	5.12381	5.32581	4.91966	5.07516	5.21694	4.1285	4.6975	4.235	4.86225	3.93017	4.41367	4.8485	4.8265	3.782	4.65775
BLMH	6.73774	6.47897	6.55778	6.61079	6.57722	6.63595	6.72706	6.40786	6.69405	6.54754	6.56405	6.63917	6.42024	6.5754	6.5973	6.63198	6.70381	6.56794	6.74016	6.64825	6.58929	6.78283	6.47197	6.596	6.5185	6.50217	6.772	6.72367	6.4925	6.9405	6.62667
BLNK	6.5573	5.94746	6.16401	5.93698	5.98239	5.89832	6.10937	6.16425	5.922	6.0704	6.28218	6.45929	6.20341	5.99518	5.84381	6.2871	6.2977	5.81944	6.06225	6.22802	6.08913	5.627	4.776	4.184	4.98982	4.5665	4.94475	5.16633	4.85917	4.564	5.0915
BLOC1S1	8.37008	7.78583	7.43714	7.18683	7.34313	7.22393	7.42853	7.29607	7.24076	7.26246	7.52351	7.72556	7.53357	7.14929	7.11071	7.58817	7.47667	7.7004	7.45063	7.48873	7.52571	7.3365	6.97325	7.18833	7.155	6.91817	7.16737	7.0845	6.88679	6.826	6.92233
BLOC1S2	8.51698	8.3219	8.63044	8.25667	8.72869	8.58315	8.10937	8.73552	8.63127	7.99762	8.66556	9.25972	8.5646	8.405	8.28571	8.38679	8.49857	8.23909	8.40825	8.73405	8.48226	7.72958	7.84242	7.766	8.0665	7.2185	7.7255	8.269	7.734	6.97233	7.9765
BLOC1S3	5.81429	5.95548	5.93095	5.89897	5.75906	5.91528	5.93683	6.01907	5.81413	6.01976	5.88752	5.97857	6.0546	5.81413	5.73536	5.98706	5.9054	6.02167	5.81552	5.8356	5.9054	5.64855	5.6455	5.70483	5.78483	5.615	5.63817	5.6025	5.5101	5.47967	5.6245
BLOC1S4	5.25079	5.4223	5.49127	5.52206	5.64187	5.37921	5.33758	5.55095	5.56861	5.40603	5.68595	5.41321	5.44306	5.42559	5.4875	5.53044	5.27056	5.55603	5.50619	5.68312	5.21694	4.84775	5.28	5.9	5.66342	5.418	5.55867	5.44317	4.95437	5.41783	5.25558
BLOC1S5	5.95302	6.34044	6.58282	6.6226	6.51508	6.52544	6.55365	6.48952	6.63638	6.55524	6.49638	6.45278	6.6271	6.51038	6.55617	6.3953	6.50746	6.43738	6.52272	6.35274	6.47675	6.87308	6.4785	6.59183	6.5265	6.44075	6.45108	6.393	6.47	6.5975	6.36425
BLOC1S5-TXNDC5	6.93524	6.95772	6.55778	6.89452	6.73024	7.21919	7.28012	6.86571	7.4094	7.36492	6.70619	6.94071	7.11	6.89833	7.48379	6.98627	6.51762	6.99881	6.52762	6.87338	7.15778	6.1805	7.2185	6.80058	6.6585	6.4325	6.78942	6.6365	7.31637	6.47258	6.671
BLOC1S6	7.92036	8.01881	8.22	8.2269	8.40853	8.29345	8.25313	8.38571	8.25738	8.54063	8.37198	8.30578	8.34619	8.33282	8.29345	8.2731	8.25	8.10937	8.3129	8.37799	8.17673	8.3945	7.944	8.2	8.0665	7.92767	8.046	8.11475	8.04	8.11842	8.3565
BLVRA	9.44048	9.53833	9.46524	9.53992	9.31675	9.50675	9.52265	9.61208	9.50802	9.63062	9.43286	9.73655	9.60679	9.54262	9.44929	9.66194	9.40548	9.40373	9.30147	9.63155	9.29976	9.33067	9.09925	9.365	9.384	9.099	9.438	9.50825	8.96913	9.38933	8.94025
BLVRB	10.0654	9.58071	9.43706	9.72548	9.67418	9.13881	9.62806	9.57452	9.29762	9.80738	9.48333	9.9298	9.64738	9.47119	8.88496	9.62968	9.65317	9.60863	9.43905	9.62163	9.54976	9.438	8.905	8.749	9.367	8.8655	9.30025	9.39525	9.047	8.8865	8.816
BLZF1	5.04754	5.14958	5.32689	5.39743	5.24585	5.33238	5.38679	5.3331	5.43278	5.35591	5.34744	5.2848	5.42625	5.37087	5.4127	5.29897	5.24563	5.14242	5.38659	5.25481	5.31808	5.6235	5.16633	5.2985	5.33958	5.17725	5.26783	5.28267	5.13867	5.47075	5.24783
BMF	5.16159	4.76877	4.49254	4.42524	4.96694	4.70623	5.05235	4.58688	4.49999	4.5856	4.65167	5.21206	4.80539	4.90988	4.31929	4.86214	4.9585	4.68063	4.71042	4.74623	4.67894	4.0455	4.564	4.1495	4.26	4.25742	4.0265	4.352	4.70679	4.148	4.547
BMI1	5.49905	5.46972	5.59643	5.81552	5.51151	5.77619	5.71735	5.70067	5.70786	5.69584	5.70405	5.42992	5.63817	5.74571	5.69619	5.45735	5.63403	5.52452	5.76176	5.67034	5.53006	5.83683	5.50317	5.96175	5.69717	5.6115	5.825	5.7235	5.48033	6.1275	5.6235
BMP1	4.65444	4.59003	4.54745	4.39667	4.29107	4.48587	4.40079	4.43429	4.53294	4.18409	4.58849	4.49266	4.35968	4.35101	4.45127	4.51183	4.54397	4.60508	4.59396	4.46627	4.51187	4.5025	4.5195	4.64258	4.524	4.483	4.89492	4.5985	4.6535	4.19775	4.51967
BMP10	3.9977	3.8576	3.7131	4.04127	4.06325	3.84881	3.7823	3.88931	3.89119	3.93929	3.88016	4.04722	4.25571	3.8969	3.8614	4.05915	3.62857	3.85075	4.00252	3.83159	3.9173	4.13792	4.0375	3.941	4.19417	3.93017	4.17275	3.8405	4.0655	3.9795	3.835
BMP15	3.6581	3.79478	3.68571	3.87769	3.72	3.74643	3.5219	3.77905	3.85326	3.63619	3.69476	3.76738	3.61214	3.8969	3.52238	4.11071	4.03175	3.78694	3.71119	3.93857	3.81135	3.95733	3.52975	3.641	3.80283	3.6985	3.58	3.6005	3.728	3.81433	3.659
BMP2	5.03302	5.63107	4.88119	4.97792	5.17202	5.35833	5.02127	4.86625	5.31115	5.02502	4.74103	4.41524	5.00832	5.1374	5.29905	4.56937	4.82718	5.41001	4.89095	4.97964	5.00151	5.80533	5.873	6.14708	5.65337	6.4325	6.052	5.71892	5.8345	5.65483	5.36542
[truncated: 22,517 more rows]
